# Supplementary material
Source: Research Square preprint supplement (doi:10.21203/rs.3.rs-8903249/v1)
Supplement: Supplementary file 1 [file 7056e77350603c1db8c2e506.xlsx]

## Sheet: Sheet1
Mass	Retention Time	Putative Formula	Isomers	Putative metabolite	confidence	Max Intensity	Polarity	Detections	Map	Pathway	Fold change WTcp/WTcp	Fold change OEcp/WTcp	Fold change dKOcp/WTcp	Fold change WTsn/WTsn	Fold change OEsn/WTsn	Fold change dKOsn/WTsn	Log2 FC OEcp/WTcp	Log2 FC dKOcp/WTcp	Log2 FC OEsn/WTsn	Log2 FC dKOsn/WTsn	WT cp_1	WT cp_2	WT cp_3	TcoDMT-OE cp_1	TcoDMT-OE cp_2	TcoDMT-OE cp_3	TcoDMT_dKO cp_1	TcoDMT_dKO cp_2	TcoDMT_dKO cp_3	WT sn_1	WT sn_2	WT sn_3	TcoDMT-OE sn_1	TcoDMT-OE sn_2	TcoDMT-OE sn_3	TcoDMT_dKO sn_1	TcoDMT_dKO sn_2	TcoDMT_dKO sn_3
257.103	11.7409	C8H20NO6P	1	sn-glycero-3-Phosphocholine	10	1163190912	posneg	24	Lipid Metabolism	Glycerophospholipid metabolism__Ether lipid metabolism	1	0.46123	1.11309	1	1.15451	1.14711	-1.11644	0.154565	0.207284	0.197998	681566976	894816064	1136295040	533488224	374551936	343128096	998582528	1163190912	857669888	2888399	2987247	3.22817e+06	2.62819e+06	3.60224e+06	4.28004e+06	2.8084e+06	3.503e+06	4.13163e+06
115.063	11.0983	C5H9NO2	4	L-Proline	10	1141222272	posneg	24	Amino Acid Metabolism	Arginine and proline metabolism__Novobiocin biosynthesis	1	1.00019	0.894264	1	1.12598	1.00807	0.000273511	-0.161227	0.171185	0.0116015	880650688	1008942464	1071731520	1141222272	918615296	902048576	799252928	1016394944	832558272	155378672	143630608	155979760	139987056	172135968	200186720	147299152	138309296	173054160
203.116	9.68163	C9H17NO4	1	O-Acetylcarnitine	10	1100426368	posneg	24	Amino Acid Metabolism	Alanine and aspartate metabolism	1	1.30914	1.08244	1	1.1604	0.996753	0.388622	0.114284	0.214625	-0.00469245	635350592	514002688	767236224	1100426368	856449984	552212992	579477696	753477376	741634240	9711756	8813956	9300698	8913696	11483768	11892354	9254567	9145345	9336138
183.066	11.9671	C5H14NO4P	1	Choline phosphate	10	891704512	posneg	24	Lipid Metabolism	Glycerophospholipid metabolism__Glycine, serine and threonine metabolism	1	1.08837	0.726272	1	2.45945	1.67879	0.122172	-0.461418	1.29834	0.747418	727097728	591897024	668304704	891704512	673464128	597753408	398463360	501898144	542958400	343848	655639	303980	918826	1365267	921717	669238	694633	824369
161.105	11.194	C7H15NO3	2	L-Carnitine	10	743453952	pos	24	Amino Acid Metabolism	Lysine degradation	1	0.81339	1.16503	1	1.04973	0.97152	-0.297981	0.220363	0.0700171	-0.0416847	478735520	531056032	594525056	475465472	407082976	422386912	523141952	743453952	602475328	50037448	47256504	45804336	40369016	49507404	60338020	43643324	45744568	49634932
146.069	12.3809	C5H10N2O3	6	L-Glutamine	10	389918752	posneg	24	Amino Acid Metabolism	Glutamate metabolism__Purine metabolism__Pyrimidine metabolism__D-Glutamine and D-glutamate metabolism__Nitrogen metabolism	1	1.06994	0.953599	1	1.06342	0.975641	0.097527	-0.0685452	0.0887127	-0.0355774	316544928	351271072	350957824	372494112	327611808	389918752	325468000	350451744	295582048	287980800	243587216	268481504	262839984	321223648	266725728	250941968	256114752	273504544
118.027	12.3353	C4H6O4	7	Succinate	10	343623168	neg	24	Carbohydrate Metabolism	Citrate cycle (TCA cycle)__Oxidative phosphorylation__Glutamate metabolism__Alanine and aspartate metabolism__Tyrosine metabolism__Phenylalanine metabolism__gamma-Hexachlorocyclohexane degradation__Glyoxylate and dicarboxylate metabolism	1	0.84009	0.835568	1	1.40277	1.29097	-0.251385	-0.25917	0.488276	0.368457	239501584	217368432	343623168	282593664	197732288	192160048	175849504	235419968	257597264	23602098	23861700	37703068	32087300	42262336	45119692	40223328	45100688	24623990
117.079	10.042	C5H11NO2	17	Betaine	10	270284704	posneg	24	Amino Acid Metabolism	Glycine, serine and threonine metabolism	1	1.12361	0.779151	1	1.11596	1.00781	0.168138	-0.360026	0.15829	0.0112287	181831264	186527312	224149168	270284704	192363552	203097728	141583616	190923360	129145736	45262880	39054056	46926140	38535100	49159340	58768040	42525160	44862116	44881268
134.022	12.8998	C4H6O5	4	(S)-Malate	10	220890896	neg	24	Carbohydrate Metabolism	Citrate cycle (TCA cycle)__Glutamate metabolism__Alanine and aspartate metabolism__Pyruvate metabolism__Glyoxylate and dicarboxylate metabolism__Carbon fixation__Reductive carboxylate cycle (CO2 fixation)	1	1.00561	0.721057	1	1.57536	1.10462	0.00807694	-0.471816	0.655678	0.143549	167174496	157925952	190468336	220890896	157589056	139983344	96060400	114029888	161663984	1.59316e+06	1.61449e+06	1.93806e+06	2.17414e+06	2.82727e+06	3.1049e+06	1959731	2134923	1.58939e+06
165.079	9.24856	C9H11NO2	7	L-Phenylalanine	10	110906640	posneg	24	Amino Acid Metabolism	Phenylalanine metabolism__Phenylalanine, tyrosine and tryptophan biosynthesis__Phenylpropanoid biosynthesis__Alkaloid biosynthesis II	1	0.939808	1.06018	1	1.03358	0.920026	-0.089562	0.0843092	0.0476517	-0.120253	76096992	78881824	87492176	81364936	65089496	81421752	110906640	83802128	62354120	30201050	27043888	31533460	24521210	33012344	34226128	26282594	26159054	29236798
89.0478	12.4156	C3H7NO2	9	L-Alanine	10	88690128	posneg	24	Amino Acid Metabolism	Alanine and aspartate metabolism__Cysteine metabolism__Taurine and hypotaurine metabolism__Selenoamino acid metabolism__D-Alanine metabolism__Carbon fixation__Reductive carboxylate cycle (CO2 fixation)	1	0.543722	0.550626	1	1.15562	1.00446	-0.879058	-0.860856	0.208672	0.00641995	84314152	62362392	88690128	55463728	37295400	35214960	28842762	44374712	56381436	2842926	2.09817e+06	2.36985e+06	1.82398e+06	3.02216e+06	3.60257e+06	2440765	2.60734e+06	2.29545e+06
149.051	10.2389	C5H11NO2S	5	L-Methionine	10	84691456	posneg	24	Amino Acid Metabolism	Methionine metabolism	1	0.996922	0.991456	1	1.07971	1.00002	-0.00444783	-0.0123794	0.110643	3.0707e-05	67686240	75599640	80396624	73573576	64728920	84691456	70954776	81886880	68929704	40274600	36897104	37840580	36135808	43183280	44860744	37191692	37244976	40578064
103.1	18.0556	C5H13NO	1	Choline	10	84551488	pos	24	Amino Acid Metabolism	Glycine, serine and threonine metabolism__Glycerophospholipid metabolism	1	0.531894	0.672751	1	1.19321	1.2015	-0.910788	-0.571856	0.254845	0.264836	34637836	48671020	84551488	35843792	27207722	26232464	31331816	42374852	39221524	3.7411e+06	3013650	3797220	2.93489e+06	4740630	4.91518e+06	4.40446e+06	3912900	4360830
172.014	11.9619	C3H9O6P	3	sn-Glycerol 3-phosphate	10	73664056	negpos	24	Lipid Metabolism	Glycerolipid metabolism__Glycerophospholipid metabolism	1	0.985985	0.935099	1	0.821041	0.742051	-0.0203629	-0.0968089	-0.284473	-0.430409	56773688	51411396	73664056	72953336	52539556	53807564	49715484	59731552	60599928	55324.9	70207.8	45607	44819.8	55365	40327.9	38627.2	40466.3	47900.9
174.112	20.033	C6H14N4O2	2	L-Arginine	10	69049240	posneg	24	Amino Acid Metabolism	Arginine and proline metabolism__Clavulanic acid biosynthesis__D-Arginine and D-ornithine metabolism	1	0.864986	0.848757	1	1.03644	0.96317	-0.209251	-0.236576	0.0516429	-0.0541372	58455268	63564656	69049240	57341008	48937356	58993812	49962148	60202304	52006852	26509104	23427714	21426326	20257722	25810512	27895704	21924154	22174790	24635918
181.074	11.3662	C9H11NO3	11	L-Tyrosine	10	59479660	posneg	24	Amino Acid Metabolism	Tyrosine metabolism__Phenylalanine, tyrosine and tryptophan biosynthesis__Novobiocin biosynthesis__Thiamine metabolism__Phenylpropanoid biosynthesis__Alkaloid biosynthesis I	1	1.04198	0.89152	1	1.10475	1.00254	0.0593253	-0.165661	0.143716	0.00366648	47248996	47986208	58247452	56495132	43950812	59479660	43455796	54838452	38538600	22225124	19427030	19093512	18180386	23458028	25470162	19180340	19432392	22287510
113.059	9.05826	C4H7N3O	1	Creatinine	10	48926120	posneg	24	Amino Acid Metabolism	Arginine and proline metabolism	1	0.790901	0.728595	1	1.04282	1.04597	-0.33843	-0.456811	0.0604944	0.0648386	37559644	48926120	43600304	34250768	29315236	39319248	28828884	36554452	29396714	19168612	18103972	18152144	15798972	19910214	22088998	22416594	17023446	18532448
133.038	12.2452	C4H7NO4	4	L-Aspartate	10	39379120	negpos	24	Amino Acid Metabolism	Alanine and aspartate metabolism__Arginine and proline metabolism__Glycine, serine and threonine metabolism__Lysine biosynthesis__Arginine and proline metabolism__Histidine metabolism__beta-Alanine metabolism__Cyanoamino acid metabolism__Carbon fixation	1	1.09924	1.29941	1	1.19981	0.861148	0.136508	0.377857	0.262808	-0.215666	28241084	21749168	28705314	33677572	23453902	29373930	27196132	35682564	39379120	2324033	2.40845e+06	1966082	2296713	2.92937e+06	2.81093e+06	1.97224e+06	1.74698e+06	2049239
146.105	18.4967	C6H14N2O2	8	L-Lysine	10	37331004	posneg	24	Amino Acid Metabolism	Lysine biosynthesis__Lysine degradation__Biotin metabolism__Alkaloid biosynthesis II	1	1.05361	0.731202	1	1.19192	0.932947	0.0753439	-0.451659	0.253286	-0.100134	23921708	27771454	31538610	30564540	19798466	37331004	18594332	25397316	16867570	11969546	10839993	10376055	11563158	12000290	15991086	9322665	9747642	11890078
204.09	10.4773	C11H12N2O2	6	L-Tryptophan	10	30841002	posneg	24	Amino Acid Metabolism	Tryptophan metabolism__Phenylalanine, tyrosine and tryptophan biosynthesis__Indole and ipecac alkaloid biosynthesis	1	0.796502	0.895765	1	1.10482	0.856721	-0.328249	-0.158807	0.14381	-0.223103	21745396	21372128	30841002	22917474	17550808	18439866	20268374	26265122	19715982	2380077	2.32795e+06	2.28348e+06	1.96172e+06	2919293	2.84333e+06	1.55728e+06	1.7865e+06	2.64598e+06
175.096	12.8807	C6H13N3O3	3	L-Citrulline	10	28436740	posneg	24	Amino Acid Metabolism	Arginine and proline metabolism	1	0.954863	0.833481	1	1.1609	0.971174	-0.0666341	-0.262779	0.215239	-0.0421986	22345196	25559216	27630534	25054180	18634618	28436740	20049444	22640796	20266712	5891451	5.98427e+06	5801138	5.07218e+06	6903032	8545782	4.94534e+06	5.50343e+06	6718531
219.111	8.29972	C9H17NO5	1	Pantothenate	10	27474184	posneg	24	Amino Acid Metabolism	beta-Alanine metabolism__Pantothenate and CoA biosynthesis	1	1.01867	0.787077	1	1.16791	0.985096	0.0266904	-0.345423	0.223928	-0.021664	20838792	24503166	21359172	22556494	17915932	27474184	16904806	19402220	16191893	8438157	5.22392e+06	7533409	6.33603e+06	8394994	10023382	7409890	5730444	7739250
180.063	12.5919	C6H12O6	57	D-Glucose	10	24823426	neg	24	Carbohydrate Metabolism	Glycolysis / Gluconeogenesis__Pentose phosphate pathway__Galactose metabolism__Starch and sucrose metabolism__Streptomycin biosynthesis__Indole and ipecac alkaloid biosynthesis	1	1.01499	0.817259	1	1.01545	0.927729	0.0214595	-0.291136	0.0221222	-0.108225	18139926	18946804	15742224	16196935	12600276	24823426	14495906	16181560	12497446	17206242	15861526	14897822	13437254	16988606	18280898	14128411	14263781	16106861
146.021	12.7315	C5H6O5	7	2-Oxoglutarate	10	22952712	neg	24	Carbohydrate Metabolism	Citrate cycle (TCA cycle)__Ascorbate and aldarate metabolism__Glutamate metabolism__Alanine and aspartate metabolism__Lysine biosynthesis__Histidine metabolism__D-Glutamine and D-glutamate metabolism__Glyoxylate and dicarboxylate metabolism	1	0.861487	0.453742	1	1.01048	0.960052	-0.215099	-1.14006	0.0150389	-0.0588155	22952712	22057754	16424001	20144208	15265285	17515502	9841986	9548144	8485253	4.00682e+06	3.72454e+06	3.87053e+06	2.74918e+06	3.83325e+06	5.14103e+06	3.62406e+06	3.56818e+06	3.94617e+06
260.03	12.675	C6H13O9P	46	D-Glucose 6-phosphate	10	20965198	neg	15	Carbohydrate Metabolism	Starch and sucrose metabolism__Streptomycin biosynthesis__Inositol phosphate metabolism	1	0.673145	0.629886	NA	NA	NA	-0.571012	-0.666837	NA	NA	19411992	15293605	20101934	20965198	8798871	7.12932e+06	7.77479e+06	11407953	15339762	0	0	0	0	0	0	0	0	0
222.067	13.2738	C7H14N2O4S	4	L-Cystathionine	10	20254770	negpos	24	Amino Acid Metabolism	Glycine, serine and threonine metabolism__Methionine metabolism	1	0.926202	0.640969	1	1.56586	1.07468	-0.110601	-0.641674	0.646952	0.103901	17870456	14339599	16627117	20254770	12739385	12238943	7430879	10463695	13408534	16481	17816.5	15558.9	24835.1	25813	27419.8	16583.4	19875.8	17120.2
196.058	11.8486	C6H12O7	11	D-Gluconic acid	10	18666632	neg	24	Carbohydrate Metabolism	Pentose phosphate pathway	1	1.06651	0.814662	1	1.08855	0.949167	0.092903	-0.295727	0.122414	-0.075266	14083948	12465260	14223478	18666632	13071791	11746221	9225335	11886995	12103621	513051	522762	441139	489833	549406	568504	461661	440530	499682
169.085	10.7552	C7H11N3O2	5	N(pi)-Methyl-L-histidine	10	18264562	posneg	24	Amino Acid Metabolism	Histidine metabolism	1	1.02116	0.80733	1	1.16645	0.976859	0.03021	-0.308769	0.222122	-0.0337784	12320542	15521927	13647736	12143940	11959666	18264562	10813109	12752289	9930899	9128133	8575176	8373645	8082368	10505752	11829283	7310046	8647474	9515975
185.993	13.0716	C3H7O7P	3	3-Phospho-D-glycerate	10	12798384	negpos	24	Carbohydrate Metabolism	Glycolysis / Gluconeogenesis__Glycine, serine and threonine metabolism__Glycerolipid metabolism__Glyoxylate and dicarboxylate metabolism__Carbon fixation	1	1.04451	0.366027	1	1.53779	1.26598	0.06283	-1.44998	0.620862	0.340257	5240631	3.35335e+06	9268884	12798384	3.4064e+06	2.45321e+06	1.134e+06	1.7324e+06	3.6719e+06	14742.1	23294.2	7346.05	24233.9	34516.6	11038.3	17503	19334.1	20616.2
180.042	7.85935	C9H8O4	11	3-(4-Hydroxyphenyl)pyruvate	10	7980112	neg	24	Amino Acid Metabolism	Tyrosine metabolism__Phenylalanine, tyrosine and tryptophan biosynthesis__Novobiocin biosynthesis__Alkaloid biosynthesis I__Biosynthesis of vancomycin group antibiotics	1	1.16459	0.586893	1	1.53788	1.09753	0.219818	-0.76883	0.620938	0.134254	6241827	6182899	5.44141e+06	7980112	5285424	7.54112e+06	3.65862e+06	4004706	2822190	1.9327e+06	1.73868e+06	2.03195e+06	2.4731e+06	2.99143e+06	3.30649e+06	2.13179e+06	2191432	1.93633e+06
167.058	7.72672	C8H9NO3	9	Pyridoxal	10	7783309	posneg	24	Metabolism of Cofactors and Vitamins	Vitamin B6 metabolism	1	1.51279	0.744146	1	1.16786	0.808084	0.597209	-0.426342	0.223867	-0.307423	2.67567e+06	5987860	3.45347e+06	6.26793e+06	4279200	7783309	3.17969e+06	3.10183e+06	2.73529e+06	3184014	3574342	4.09332e+06	4.24136e+06	3.96379e+06	4468086	2.46992e+06	3092063	3207077
90.0318	9.18055	C3H6O3	6	(R)-Lactate	10	6943167	neg	24	Carbohydrate Metabolism	Pyruvate metabolism	1	0.986966	0.72742	1	0.972088	0.928652	-0.0189274	-0.45914	-0.0408417	-0.10679	5.01682e+06	5883320	5.30729e+06	5.03482e+06	4.0182e+06	6.94317e+06	3.67151e+06	4289445	3.82865e+06	2.95592e+06	2.90412e+06	2.62667e+06	2.24237e+06	2.9291e+06	3.07835e+06	2.46195e+06	2.5721e+06	2847153
88.0161	8.15433	C3H4O3	3	Pyruvate	10	4294499	neg	24	Carbohydrate Metabolism	Glycolysis / Gluconeogenesis__Citrate cycle (TCA cycle)__Pentose phosphate pathway__Ascorbate and aldarate metabolism__Biosynthesis of steroids__Alanine and aspartate metabolism__Glycine, serine and threonine metabolism	1	0.739972	0.275479	1	1.02562	0.762121	-0.434458	-1.85999	0.0364995	-0.391908	4.2945e+06	4.11692e+06	1.78738e+06	3.30786e+06	1.82654e+06	2412423	809498	885836	1.11422e+06	1.32839e+06	1.16531e+06	715920	883795	1.16342e+06	1244635	625147	603361	1.21761e+06
135.055	8.89478	C5H5N5	1	Adenine	10	3732149	posneg	24	Nucleotide Metabolism	Purine metabolism__Zeatin biosynthesis	1	0.440845	0.803986	1	0.591024	0.560262	-1.18166	-0.314758	-0.758712	-0.835827	2.49085e+06	2.1957e+06	3.73215e+06	1.46773e+06	1.33475e+06	908872	1.69282e+06	2.26833e+06	2.80736e+06	199679	227802	225250	125312	108314	152154	110791	111538	143372
125.015	12.6821	C2H7NO3S	1	Taurine	10	3652540	negpos	24	Lipid Metabolism	Bile acid biosynthesis__Taurine and hypotaurine metabolism	1	1.65073	1.19888	1	1.16245	0.993092	0.723108	0.261687	0.217163	-0.01	935928	1.69844e+06	1.02935e+06	1.0874e+06	1.65009e+06	3.31035e+06	2.01883e+06	1474345	899191	2.70727e+06	2151947	2339941	2.16656e+06	2.76655e+06	3.43551e+06	2.23648e+06	2.29783e+06	2.61512e+06
151.049	11.2388	C5H5N5O	3	Guanine	10	2805480	posneg	24	Nucleotide Metabolism	Purine metabolism	1	1.14819	0.866032	1	2.24779	1.07205	0.199363	-0.207507	1.16851	0.100378	1112667	1.63219e+06	2.03659e+06	1951454	1.60419e+06	1.93437e+06	1237055	1.24761e+06	1656221	1.09839e+06	966780	1.4537e+06	2.49971e+06	2.60451e+06	2.80548e+06	1.2405e+06	1.41288e+06	1.11905e+06
145.11	13.8297	C7H15NO2	6	Acetylcholine	10	2647076	pos	24	Lipid Metabolism	Glycerophospholipid metabolism	1	0.571342	0.537223	1	1.04891	1.53613	-0.807574	-0.896408	0.0688971	0.619304	1.97255e+06	2.64708e+06	2.53114e+06	1.64626e+06	1.21167e+06	1.2276e+06	1184851	1.43125e+06	1.22545e+06	9376.5	7477.73	11019.8	8047.25	10619.4	10570.9	16826.4	13887.8	12104.1
167.982	13.4651	C3H5O6P	3	Phosphoenolpyruvate	10	1491901	negpos	15	Carbohydrate Metabolism	Glycolysis / Gluconeogenesis__Citrate cycle (TCA cycle)__Phenylalanine, tyrosine and tryptophan biosynthesis__Aminophosphonate metabolism__Pyruvate metabolism__Carbon fixation__Reductive carboxylate cycle (CO2 fixation)	1	0.739187	0.469411	NA	NA	NA	-0.435988	-1.09108	NA	NA	945441	914598	1.4919e+06	1.27395e+06	675896	527867	380757	429079	763601	0	0	0	0	0	0	0	0	0
123.032	7.54338	C6H5NO2	4	Nicotinate	10	1384000	pos	24	Metabolism of Cofactors and Vitamins	Nicotinate and nicotinamide metabolism__Alkaloid biosynthesis II	1	0.668091	0.748181	1	1.44992	1.06095	-0.581883	-0.418541	0.535978	0.0853519	633485	1.06089e+06	1.384e+06	627688	546377	882569	651259	887121	764800	236042	217009	298129	284632	347046	457477	270435	273088	253440
267.097	8.39207	C10H13N5O4	3	Adenosine	10	1227507	posneg	24	Nucleotide Metabolism	Purine metabolism	1	0.958496	0.522643	1	0.881537	1.09788	-0.0611562	-0.936102	-0.181906	0.134722	829568	833661	1222595	1.22751e+06	832577	705965	388113	512741	607403	7116.49	5539.54	9163.79	5809.62	6267.7	7157.65	8020.53	9268.78	6666.24
132.09	17.3429	C5H12N2O2	6	L-Ornithine	10	964928	neg	24	Amino Acid Metabolism	Arginine and proline metabolism__D-Arginine and D-ornithine metabolism__Glutathione metabolism	1	0.554372	0.889302	1	1.08234	1.04345	-0.851073	-0.169254	0.11416	0.0613576	800132	617308	964928	539796	347862	433062	619566	818584	680496	59926.7	74068.2	56179.2	54701	81816.1	69316.8	57316.7	67880.8	73239.2
169.074	7.5961	C8H11NO3	4	Pyridoxine	10	791053	pos	24	Metabolism of Cofactors and Vitamins	Vitamin B6 metabolism	1	0.83665	0.855014	1	1.43545	1.15017	-0.257304	-0.22598	0.521499	0.201842	451903	522284	791053	549935	428820	498135	415866	528350	565090	98251.8	78898.6	107754	111042	154205	143718	117216	109775	100696
126.043	10.3571	C5H6N2O2	2	Imidazole-4-acetate	10	478689	pos	24	Amino Acid Metabolism	Histidine metabolism	1	0.882423	0.566311	1	1.2106	1.04163	-0.180458	-0.820334	0.275721	0.0588415	365440	358400	478689	405456	238659	417024	185312	250665	245029	76854.2	76545.2	81200.8	66105.4	97044.5	120857	77024.8	82187.6	85154
238.099	9.4298	C8H18N2O4S	1	HEPES	9	1188456064	posneg	24	Medium Component	0	1	0.980296	0.944316	1	1.05821	0.998404	-0.0287105	-0.0826585	0.0816221	-0.0023043	889015744	945804544	934091456	906846144	844542144	962965056	857545408	922075328	835106624	825216576	787454336	834890048	788709696	837339712	963977152	824970368	789429504	829254912
441.14	12.9827	C19H19N7O6	1	Folate	9	2235261	neg	24	Metabolism of Cofactors and Vitamins	One carbon pool by folate__Folate biosynthesis	1	0.708942	1.01747	1	1.15911	0.862872	-0.49626	0.0249793	0.213011	-0.212782	1.58318e+06	1.0951e+06	2220024	1.55513e+06	912649	1.00483e+06	1.30309e+06	2.23526e+06	1.4455e+06	91458.9	83316.1	79992.4	87710.5	101704	105888	64947.7	77958.6	76925.4
131.095	9.68469	C6H13NO2	12	L-Leucine	8	109691520	posneg	24	Amino Acid Metabolism	Valine, leucine and isoleucine degradation__Valine, leucine and isoleucine biosynthesis	1	1.11281	0.937721	1	1.29435	0.936127	0.154206	-0.092769	0.372223	-0.095224	67255520	71022320	78450440	71264784	60220832	109691520	65474744	75737680	62018284	34709292	30473960	34774844	29753600	60142912	39483804	29701292	29248414	34623756
147.053	12.0107	C5H9NO4	14	L-Glutamate	8	99395744	posneg	24	Amino Acid Metabolism	Arginine and proline metabolism__Glutamate metabolism__Histidine metabolism__D-Glutamine and D-glutamate metabolism__Glutathione metabolism_Butanoate metabolism_C5-Branched dibasic acid metabolism_Porphyrin and chlorophyll metabolism_Nitrogen metabolism	1	0.68742	0.916693	1	1.07047	0.922681	-0.540736	-0.12549	0.0982401	-0.116095	69849496	81426664	99395744	63416248	48476252	60424384	68994136	83277720	77517200	30097328	26810644	26986516	25535520	31055658	33215092	25551682	25714414	26141796
126.043	7.1318	C5H6N2O2	2	Thymine	8	88348048	negpos	24	Nucleotide Metabolism	Pyrimidine metabolism	1	0.995229	0.825367	1	0.955147	0.872889	-0.00689985	-0.276893	-0.0662057	-0.19613	67484904	68090288	66132028	61485264	50911524	88348048	56712076	60761336	49009020	42684044	43104604	43827820	33950936	44115288	45736520	36332900	35746412	41061476
136.039	9.50263	C5H4N4O	3	Hypoxanthine	8	86762248	posneg	24	Nucleotide Metabolism	Purine metabolism	1	1.00198	0.865509	1	1.31215	1.07533	0.00284652	-0.208379	0.391932	0.104777	59709744	64691920	60823488	66814280	50432932	68343760	53120152	57996480	49197436	40207456	38436332	39111912	37776372	38496852	78239816	50167280	38455548	38003156
105.043	12.9831	C3H7NO3	4	L-Serine	8	29364166	negpos	24	Amino Acid Metabolism	Glycine, serine and threonine metabolism__Methionine metabolism__Cysteine metabolism__Cyanoamino acid metabolism__Sphingolipid metabolism__Methane metabolism__Sulfur metabolism	1	0.813773	0.847294	1	1.00024	0.918889	-0.297302	-0.239066	0.000349526	-0.122038	29364166	23877946	27472884	26187860	19313502	20182326	21424180	23475388	23489728	5.16073e+06	4914264	4402771	4.25047e+06	4937118	5293678	4.25422e+06	4257018	4.79221e+06
75.032	12.9954	C2H5NO2	3	Glycine	8	26471938	negpos	24	Amino Acid Metabolism	Bile acid biosynthesis__Purine metabolism__Glycine, serine and threonine metabolism__Lysine degradation__Cyanoamino acid metabolism__Glutathione metabolism__Methane metabolism__Thiamine metabolism__Porphyrin and chlorophyll metabolism__Nitrogen metabolism	1	0.995859	0.763975	1	1.19351	0.961673	-0.00598728	-0.388403	0.255209	-0.0563822	20946560	16908992	22426444	26471938	17522712	16037690	12265237	17141420	16647282	600441	554462	548236	576845	713949	741918	525955	561813	550094
132.053	12.578	C4H8N2O3	6	L-Asparagine	8	18558644	negpos	24	Amino Acid Metabolism	Alanine and aspartate metabolism__Tetracycline biosynthesis__Cyanoamino acid metabolism__Nitrogen metabolism	1	0.918242	1.05729	1	1.065	0.909716	-0.123053	0.080367	0.0908476	-0.136512	13314237	15338676	13545683	11752871	12484084	14511576	16138824	14014229	14462972	7913159	7411436	6898842	6630188	8.32208e+06	8715596	6197557	6771646	7247808
240.024	12.8686	C6H12N2O4S2	2	L-Cystine	8	18198130	posneg	24	Amino Acid Metabolism	Cysteine metabolism	1	1.12927	0.896075	1	1.4822	0.761895	0.175386	-0.158309	0.567737	-0.392336	9528211	12114773	10878098	10419909	8106940	18198130	9525120	10569925	9046280	1.72248e+06	2.69308e+06	3.23548e+06	2787687	3421293	5.13137e+06	1.12145e+06	2.5596e+06	2.14824e+06
148.037	12.1352	C5H8O5	18	(R)-2-Hydroxyglutarate	8	8651503	neg	24	Amino Acid Metabolism	glutamate degradation V (via hydroxyglutarate)	1	1.30089	0.800385	1	1.0242	0.764881	0.379502	-0.321235	0.0344967	-0.386692	5.18268e+06	4.92252e+06	4.98544e+06	6126562	4853242	8651503	3777947	4.15896e+06	4.14142e+06	1.3453e+06	1.29592e+06	898516	937335	1.34171e+06	1.34634e+06	841378	898100	967996
145.11	11.1629	C7H15NO2	6	4-Trimethylammoniobutanoate	8	8386824	pos	24	Amino Acid Metabolism	Lysine degradation	1	1.03696	0.871896	1	0.961538	0.88314	0.0523562	-0.197772	-0.0565835	-0.179286	6161191	6028272	8.38682e+06	8361972	6588405	6.38635e+06	5.30303e+06	6.48395e+06	6153412	706548	621736	628908	510501	648001	723414	536458	567950	624067
152.033	10.5449	C5H4N4O2	3	Xanthine	8	3762717	negpos	24	Nucleotide Metabolism	Purine metabolism__Caffeine metabolism	1	1.14285	0.93598	1	1.09208	0.891081	0.19264	-0.095451	0.127083	-0.166372	2.59749e+06	2.81562e+06	2.61746e+06	2.88481e+06	2.53024e+06	3762717	2.47475e+06	2.79253e+06	2.24917e+06	1.70133e+06	1.59573e+06	1.64214e+06	1.5249e+06	1.76029e+06	2.10883e+06	1.38333e+06	1.49275e+06	1.52514e+06
97.9768	11.91	H3O4P	1	Orthophosphate	8	2253363	pos	24	Energy Metabolism	Oxidative phosphorylation__Photosynthesis__Peptidoglycan biosynthesis	1	1.05693	1.02555	1	0.698442	0.918679	0.0798779	0.0363928	-0.517788	-0.122368	1712410	1.58064e+06	1.98138e+06	2.25336e+06	1.59293e+06	1.7284e+06	1.3258e+06	1.86459e+06	2.21878e+06	5923.81	6859.8	12098.7	5247.1	5395.2	6736.52	6225.74	6836.8	9796.28
347.063	11.1871	C10H14N5O7P	7	AMP	8	1741731	posneg	15	Nucleotide Metabolism	Purine metabolism__Zeatin biosynthesis	1	0.972068	1.0931	NA	NA	NA	-0.0408703	0.128422	NA	NA	951692	984732	1367160	1243025	979342	988943	934145	1.74173e+06	935262	0	0	0	0	0	0	0	0	0
192.027	13.8611	C6H8O7	12	Citrate	8	1727554	neg	24	Carbohydrate Metabolism	Citrate cycle (TCA cycle)__Glutamate metabolism__Alanine and aspartate metabolism__Glyoxylate and dicarboxylate metabolism__Reductive carboxylate cycle (CO2 fixation)	1	0.995758	0.719102	1	1.0107	0.898398	-0.0061329	-0.475731	0.0153587	-0.154574	1204376	1.39784e+06	1.44886e+06	1.36061e+06	945732	1.72755e+06	935978	1.02686e+06	950310	212040	170435	168561	143762	179484	233689	160053	155909	179088
104.047	8.82657	C4H8O3	13	(R)-3-Hydroxybutanoate	8	1422135	neg	24	Lipid Metabolism	Synthesis and degradation of ketone bodies__Butanoate metabolism	1	0.905073	0.754385	1	1.02109	0.953603	-0.143893	-0.406627	0.0301047	-0.0685391	1203669	1.24525e+06	1.34496e+06	1.17927e+06	832333	1.42214e+06	881219	1.06023e+06	920595	514502	443574	437580	365868	515030	544186	456208	418147	456546
309.106	11.2829	C11H19NO9	5	N-Acetylneuraminate	8	809066	neg	24	Carbohydrate Metabolism	Aminosugars metabolism	1	0.690601	0.927676	1	1.03063	0.939136	-0.534076	-0.108307	0.0435316	-0.0905942	733464	767737	809066	556466	505270	533737	746405	782616	614158	27819.3	20257.9	20729.6	16526	25331.1	29057.5	23257.4	24861.1	16500.5
179.079	12.6577	C6H13NO5	10	D-Glucosamine	8	581439	neg	24	Carbohydrate Metabolism	Aminosugars metabolism	1	0.999367	0.927047	1	1.13564	1.13422	-0.000913667	-0.109286	0.183508	0.1817	499167	525343	421686	436012	427829	581439	478180	507990	354521	132418	128810	98030.6	113772	157358	136858	141002	130017	136459
221.09	10.4799	C8H15NO6	7	N-Acetyl-D-glucosamine	8	500403	pos	24	Amino Acid Metabolism	Glutamate metabolism__Aminosugars metabolism	1	0.876727	0.848252	1	1.7982	1.13887	-0.1898	-0.237436	0.846557	0.187598	500403	403964	497284	467975	349440	411451	353925	463345	371683	48641.1	45489.9	58820	68292.3	89015.2	117729	56247.7	63184.9	54758.1
243.086	10.6832	C9H13N3O5	4	Cytidine	8	498235	posneg	24	Nucleotide Metabolism	Pyrimidine metabolism	1	1.05663	1.23944	1	1.52046	1.06053	0.0794748	0.309684	0.604505	0.0847788	271751	249377	373078	343427	274598	326823	392544	498235	217532	38433	35096.4	46780.2	47137.4	62925.5	72862.7	35584.1	40752.5	51254.8
156.017	9.68951	C5H4N2O4	2	Orotate	8	416895	neg	24	Nucleotide Metabolism	Pyrimidine metabolism	1	1.1265	0.987737	1	1.37806	1.18612	0.171852	-0.0178013	0.462636	0.246247	215281	263744	376838	293579	253659	416895	262659	353675	229034	100512	120207	171724	138890	189124	212794	171013	172010	122459
230.019	12.5117	C5H11O8P	16	D-Ribose 5-phosphate	8	383164	neg	15	Carbohydrate Metabolism	Pentose phosphate pathway__Purine metabolism__Carbon fixation	1	0.518209	0.686068	NA	NA	NA	-0.948393	-0.543576	NA	NA	215021	263142	383164	191712	121965	132671	106118	222784	262027	0	0	0	0	0	0	0	0	0
324.036	12.1146	C9H13N2O9P	4	UMP	8	313928	neg	15	Nucleotide Metabolism	Pyrimidine metabolism__Peptidoglycan biosynthesis	1	0.985007	0.883007	NA	NA	NA	-0.0217947	-0.179504	NA	NA	266613	221933	257095	313928	178058	242476	181835	287657	188914	0	0	0	0	0	0	0	0	0
515.292	4.06919	C26H45NO7S	5	Taurocholate	8	160977	neg	24	Lipid Metabolism	Bile acid biosynthesis__Taurine and hypotaurine metabolism	1	0.947469	0.807488	1	0.968426	0.787425	-0.0778495	-0.308488	-0.0462863	-0.344786	153727	149270	121098	143252	97587.2	160977	114108	116830	111514	74189.9	59463.9	60199	49086.2	67294.3	71351.5	47371.3	48686.3	56586.8
251.102	7.64674	C10H13N5O3	4	Deoxyadenosine	8	73503	pos	15	Nucleotide Metabolism	Purine metabolism	1	2.37584	0.945445	NA	NA	NA	1.24844	-0.0809344	NA	NA	16067.4	24443.3	34492.5	73502.5	62450.5	42242.3	12834.4	16152.5	41924.5	0	0	0	0	0	0	0	0	0
228.075	7.82815	C9H12N2O5	3	Deoxyuridine	8	63064	neg	24	Nucleotide Metabolism	Pyrimidine metabolism	1	1.27477	1.04396	1	1.1768	1.10497	0.350241	0.062072	0.234872	0.144007	40674.8	39213.2	41999.8	56695	35620.1	63064.3	41957.6	40278.3	45010.5	15996.2	17638.8	17041.4	15062.1	20461.2	24112.7	17931.4	20175.3	17889.2
188.116	10.8507	C8H16N2O3	7	N6-Acetyl-L-lysine	8	273604096	posneg	24	Amino Acid Metabolism	Lysine degradation	1	0.809961	1.03786	1	1.68052	1.25321	-0.304075	0.0536187	0.748909	0.325628	235023280	237690576	270328896	229470544	191304592	181060864	237024656	273604096	260549280	7.26184e+06	8115873	10642894	11699773	15229770	16798656	11491729	12368769	8748772
256.24	3.25507	C16H32O2	27	Hexadecanoic acid	8	187649888	neg	24	Lipid Metabolism	Fatty acid biosynthesis__Fatty acid elongation in mitochondria__Fatty acid metabolism__Biosynthesis of unsaturated fatty acids	1	0.734586	0.848829	1	0.822484	0.921368	-0.444996	-0.236455	-0.281941	-0.11815	187649888	184430944	148229456	154282704	126053152	101877056	128051912	159488512	154113792	116501312	136428368	85173296	83422992	98560912	96100296	104367296	85314624	121835392
119.058	12.067	C4H9NO3	11	L-Threonine	8	126472920	posneg	24	Amino Acid Metabolism	Glycine, serine and threonine metabolism__Valine, leucine and isoleucine biosynthesis__Porphyrin and chlorophyll metabolism	1	0.768601	0.673705	1	0.975499	0.952628	-0.379693	-0.569811	-0.0357875	-0.0700149	126472920	113035968	115759512	112506688	75089784	85463224	66643160	81362688	91340192	22164346	21750204	22476998	17836618	21760256	25168022	20365872	20264908	22615680
155.07	12.2211	C6H9N3O2	5	L-Histidine	8	94886120	posneg	24	Amino Acid Metabolism	Histidine metabolism__beta-Alanine metabolism	1	0.976092	0.912245	1	1.07112	1.02781	-0.034911	-0.132507	0.099126	0.0395758	80435408	88143272	83044432	80927456	69793720	94886120	73124808	83155328	73261760	46360396	41583432	42358544	38332688	51757452	49479908	44198028	40570320	49157936
176.032	12.5777	C6H8O6	15	Ascorbate	8	74875816	neg	24	Carbohydrate Metabolism	Ascorbate and aldarate metabolism__Glutathione metabolism	1	1.10843	0.744575	1	1.31744	0.873682	0.148517	-0.42551	0.397742	-0.194819	55737592	57802072	60160724	74875816	50885740	66773088	36534268	48975696	43823040	10917102	10351761	10343131	12602516	15621446	13423089	8703691	9336013	9579133
188.153	16.7883	C9H20N2O2	2	N6,N6,N6-Trimethyl-L-lysine	8	38778740	posneg	24	Amino Acid Metabolism	Lysine degradation	1	0.949931	0.387423	1	2.24852	1.22723	-0.0741056	-1.36802	1.16897	0.295407	31151260	20596766	28293464	38778740	13897515	23357624	5245253	11658872	14105820	207936	187795	221450	369815	382461	635466	241983	237677	277764
125.999	10.2396	C2H6O4S	1	2-Hydroxyethanesulfonate	8	19340082	neg	24	Amino Acid Metabolism	Taurine and hypotaurine metabolism	1	1.14681	0.848428	1	1.28936	0.936307	0.197621	-0.237135	0.366659	-0.0949457	11086676	11256986	13319012	13486165	8.07191e+06	19340082	9805179	11617526	8834514	4920649	4.12553e+06	4614091	5320357	4.86171e+06	7430974	4.01939e+06	4.22008e+06	4550734
360.644	14.4541	C27H47N9O10S2	1	Trypanothione disulfide	8	17038220	posneg	23	Amino Acid Metabolism	Glutathione metabolism	1	0.339508	0.340264	1	2.26859	1.91157	-1.55848	-1.55527	1.1818	0.934755	4.25306e+06	2.94392e+06	17038220	5.5199e+06	1.2833e+06	1.42486e+06	1.32067e+06	4.47048e+06	2455213	1081.87	6931.92	0	9843.59	6020.33	2316.1	3300.08	5432.77	6586.05
164.047	4.3204	C9H8O3	13	Phenylpyruvate	8	13036983	neg	24	Amino Acid Metabolism	Phenylalanine metabolism__Phenylalanine, tyrosine and tryptophan biosynthesis	1	1.04703	0.514837	1	1.51028	1.04703	0.0663083	-0.957812	0.594818	0.0662965	10930486	8968775	9613497	13036983	6.82948e+06	11034396	5276541	5567839	4349885	2.62279e+06	2242668	2525074	3.29e+06	3.68499e+06	4186798	2.5826e+06	2.59022e+06	2.56525e+06
566.055	12.7515	C15H24N2O17P2	3	UDP-glucose	8	8979326	neg	15	Carbohydrate Metabolism	Pentose and glucuronate interconversions__Galactose metabolism__Ascorbate and aldarate metabolism__Pyrimidine metabolism__Starch and sucrose metabolism__Nucleotide sugars metabolism__Glycerolipid metabolism__Zeatin biosynthesis__Biosynthesis of ansamycins	1	0.429234	0.83079	NA	NA	NA	-1.22016	-0.267444	NA	NA	8979326	5.05608e+06	8564948	5.45051e+06	2.25689e+06	1.99345e+06	3.83982e+06	6.85551e+06	8.08081e+06	0	0	0	0	0	0	0	0	0
145.037	9.84564	C5H7NO4	2	2-Oxoglutaramate	8	7675166	neg	24	Amino Acid Metabolism	Glutamate metabolism	1	1.05991	0.878979	1	1.16904	0.979115	0.0839482	-0.1861	0.225324	-0.0304502	5.70691e+06	5904699	6.36215e+06	6.50152e+06	4873968	7675166	5.20469e+06	5.91575e+06	4678107	2.14136e+06	1.75882e+06	2.12791e+06	1.77771e+06	2.41822e+06	2851138	2061932	1.93604e+06	1.90421e+06
200.178	3.42407	C12H24O2	15	Dodecanoic acid	8	6155920	neg	24	Lipid Metabolism	Fatty acid biosynthesis	1	0.683591	0.824721	1	0.619768	1.05096	-0.548796	-0.278023	-0.6902	0.0717049	6.15592e+06	5.01344e+06	5.16273e+06	4760003	3827316	2.57715e+06	3731870	4.98841e+06	4749137	3.96939e+06	2.9229e+06	2.30155e+06	1.48566e+06	2.45861e+06	1.75378e+06	3.3355e+06	2357625	3.96922e+06
166.063	7.11164	C9H10O3	17	3-(3-Hydroxy-phenyl)-propanoic acid	8	4689000	neg	20	Amino Acid Metabolism	Phenylalanine metabolism	1	1.41709	0.391916	1	1.89513	0.375273	0.502931	-1.35138	0.9223	-1.41399	2.15701e+06	1.74352e+06	2413935	4.689e+06	2.33511e+06	1.92405e+06	567334	879884	1.02752e+06	0	25573.8	29372	0	39686.9	64442.7	0	20619.6	0
130.063	7.1521	C6H10O3	18	3-Oxo-4-methylpentanoic acid	8	4601044	neg	24	Amino Acid Metabolism	Valine, leucine and isoleucine degradation	1	0.773239	0.783271	1	0.586225	0.857936	-0.371014	-0.352417	-0.770474	-0.221058	4601044	3.63052e+06	3319201	2.55008e+06	3.48816e+06	2.89326e+06	2.71844e+06	3.34946e+06	2.97948e+06	3.2433e+06	2.1859e+06	2144062	913694	2362254	1.16369e+06	2.39676e+06	1.89801e+06	2.20261e+06
106.027	10.7049	C3H6O4	2	D-Glycerate	8	4242826	neg	24	Carbohydrate Metabolism	Glycine, serine and threonine metabolism__Glycerolipid metabolism__Glyoxylate and dicarboxylate metabolism	1	1.01217	0.629642	1	1.18342	0.92957	0.0174493	-0.667396	0.242964	-0.105364	3.56923e+06	2.65686e+06	2981047	4.24283e+06	2.64388e+06	2.43248e+06	1.55389e+06	2.05565e+06	2187666	206489	183033	211198	188664	244479	277763	175106	185780	197526
134.058	8.68212	C5H10O4	8	Deoxyribose	8	4121194	neg	24	Carbohydrate Metabolism	Pentose phosphate pathway	1	0.797623	0.477238	1	1.38264	1.32278	-0.326222	-1.06722	0.467429	0.403572	4.12119e+06	3.42751e+06	3.13199e+06	4044220	2.57803e+06	1.89691e+06	963200	1.26546e+06	2868571	18903.1	21217.4	17909.5	25780.2	30165.8	24288.8	27576.4	22051.3	27133.1
132.042	7.18292	C5H8O4	16	2-Acetolactate	8	3531253	neg	24	Carbohydrate Metabolism	Butanoate metabolism__Pantothenate and CoA biosynthesis	1	1.34874	0.474017	1	1.43342	1.02305	0.431614	-1.07699	0.519459	0.0328708	1.80341e+06	1.76242e+06	1.13803e+06	3.53125e+06	1.76042e+06	1.05261e+06	438474	734155	1057075	14909.3	16233	15572.5	22295.3	30008.7	14657.8	12752.7	23153.2	11885.5
159.053	11.2603	C6H9NO4	3	4-Methylene-L-glutamate	8	3482418	negpos	24	Carbohydrate Metabolism	C5-Branched dibasic acid metabolism	1	0.685143	0.865454	1	1.20523	0.915869	-0.545523	-0.208471	0.269311	-0.126786	2.8497e+06	2.42595e+06	3482418	2609840	1.75028e+06	1.6404e+06	1.98964e+06	2.86917e+06	2.72089e+06	71284.7	62301.1	61646.8	63669.8	80403	91227.8	55420.1	57496.6	65890.9
172.146	3.58033	C10H20O2	23	Decanoic acid	8	3244509	neg	24	Lipid Metabolism	Fatty acid biosynthesis	1	0.883559	0.654249	1	0.688549	0.903353	-0.178602	-0.612089	-0.53837	-0.146638	3244509	2.32414e+06	2.62862e+06	2.67976e+06	2.50704e+06	2055968	1.84646e+06	1.85849e+06	1.6581e+06	1.84743e+06	2.28043e+06	1.29195e+06	1.17603e+06	1394956	1.16082e+06	1.23166e+06	1.5236e+06	2140745
130.111	15.839	C6H14N2O	2	N-Acetylputrescine	8	3083462	pos	24	Amino Acid Metabolism	Arginine and proline metabolism	1	0.679855	0.774678	1	1.12736	1.15821	-0.556702	-0.368331	0.172944	0.211891	2584836	3083462	2968990	2.09148e+06	1846642	1.93398e+06	2200443	2.40246e+06	2.08822e+06	531381	504819	527842	433024	581449	748761	654638	534718	622126
182.058	8.7566	C9H10O4	13	3-(4-Hydroxyphenyl)lactate	8	2980198	neg	24	Amino Acid Metabolism	Tyrosine metabolism	1	1.33321	0.611417	1	1.17939	1.18358	0.414902	-0.709771	0.238036	0.243157	1.49693e+06	1.33029e+06	2.03148e+06	2.9802e+06	1.86786e+06	1.6296e+06	853232	1.01987e+06	1.09759e+06	87014.2	73680.3	86182.2	75444.4	98085.1	117633	114328	105406	72464.5
215.056	12.5588	C5H14NO6P	1	sn-glycero-3-Phosphoethanolamine	8	1745100	negpos	15	Lipid Metabolism	Glycerophospholipid metabolism__Ether lipid metabolism	1	0.33515	2.51389	NA	NA	NA	-1.57712	1.32992	NA	NA	376743	494340	817360	170448	202318	193115	1.7451e+06	1.69153e+06	807936	0	0	0	0	0	0	0	0	0
259.046	13.6366	C6H14NO8P	8	D-Glucosamine 6-phosphate	8	1707781	posneg	15	Amino Acid Metabolism	Glutamate metabolism__Aminosugars metabolism	1	1.07003	0.670357	NA	NA	NA	0.0976505	-0.576999	NA	NA	1.04622e+06	773206	1.34895e+06	1.70778e+06	890024	792457	514393	843835	765719	0	0	0	0	0	0	0	0	0
264.104	19.7157	C12H16N4OS	1	Thiamin	8	1632272	posneg	24	Metabolism of Cofactors and Vitamins	Thiamine metabolism	1	0.924404	0.719211	1	1.37748	0.75855	-0.113405	-0.475513	0.46203	-0.398684	961557	1.63227e+06	1.43916e+06	1.12364e+06	984087	1.62039e+06	768730	1.24322e+06	888623	334414	315943	381872	336972	432439	652462	287878	171843	323276
154.038	9.8764	C6H6N2O3	2	Imidazol-5-yl-pyruvate	8	1552295	posneg	24	Amino Acid Metabolism	Histidine metabolism	1	0.749896	0.477257	1	2.1393	1.02154	-0.415237	-1.06716	1.09714	0.0307422	1.22567e+06	1416438	1.5523e+06	1313838	893798	937735	581481	736387	683943	49009.9	70673	141400	154432	166836	237266	49605.4	165099	52001.9
145.074	8.21019	C6H11NO3	9	6-Amino-2-oxohexanoate	8	1549182	pos	24	Amino Acid Metabolism	Lysine degradation	1	1.52828	1.23167	1	0.883832	1.06344	0.611912	0.300613	-0.178157	0.0887435	999350	421122	324580	1.54918e+06	745714	372035	576574	589986	982762	100230	112562	77251.2	64510.5	127494	64344.9	87409.4	88392	132643
189.064	12.0023	C7H11NO5	4	N-Acetyl-L-glutamate	8	1539756	negpos	24	Amino Acid Metabolism	Arginine and proline metabolism	1	0.446974	0.271158	1	0.550563	0.573907	-1.16174	-1.88279	-0.861019	-0.80111	1.53976e+06	525242	335669	604873	285939	182222	96443.4	174528	379988	12776.4	32231.7	34838.6	13009	15009.3	15942.4	14347.3	11664	19813.3
165.046	11.3335	C5H11NO3S	4	L-Methionine S-oxide	8	1317307	posneg	24	Amino Acid Metabolism	Methionine metabolism	1	0.742678	0.786048	1	1.01935	0.990248	-0.429191	-0.347311	0.0276498	-0.0141379	1.09429e+06	1317307	1.26362e+06	861017	691096	1.17739e+06	1.16999e+06	941306	777606	639101	528433	514483	439485	617321	657759	511186	545110	609319
174.079	7.11572	C10H10N2O	4	Indole-3-acetamide	8	1261324	pos	24	Amino Acid Metabolism	Tryptophan metabolism	1	2.08162	0.803882	1	3.84455	0.5853	1.0577	-0.314944	1.94281	-0.772751	264293	322150	677940	958950	420165	1252845	377267	318716	320432	85979.2	120301	492795	1.02602e+06	400288	1.26132e+06	78563.6	243742	86863.6
104.022	10.357	C2H4N2O3	1	Urea-1-carboxylate	8	1140228	neg	24	Amino Acid Metabolism	Arginine and proline metabolism__Atrazine degradation	1	1.07448	0.804027	1	8.78052	3.82255	0.10364	-0.314685	3.13431	1.93453	924282	863652	928675	1.04538e+06	733334	1.14023e+06	677129	814644	692453	32900.4	37511.2	28017.9	351413	52351.2	460498	46037.3	41805.2	288409
483.969	13.5434	C9H15N2O15P3	1	UTP	8	1117986	neg	19	Nucleotide Metabolism	Pyrimidine metabolism	1	0.703084	0.650575	1	1.95129	1.1903	-0.508232	-0.620213	0.964431	0.251324	1.11799e+06	661255	958132	953591	572118	398893	453595	623238	704032	0	2806.34	0	2784.85	2691.15	0	0	0	3340.39
115.063	22.3004	C5H9NO2	4	D-Proline	8	1082520	neg	24	Amino Acid Metabolism	Arginine and proline metabolism	1	1.82584	1.59519	1	1.53951	0.566862	0.868564	0.673732	0.622471	-0.818931	498724	459295	206560	808983	706854	610503	334141	957398	566190	392526	403371	702304	1.08252e+06	531971	692003	231914	366729	250629
149.105	8.78318	C6H15NO3	1	Triethanolamine	8	1031199	pos	24	Lipid Metabolism	Glycerophospholipid metabolism	1	0.652643	1.90478	1	0.379241	0.169801	-0.615633	0.929623	-1.39881	-2.55809	52426.6	143551	28985.1	36728.2	73656.6	36435.6	34488.1	76939.1	317077	1.0312e+06	130897	79634.1	395427	35246.6	40241.2	116019	29477.7	65349.5
160.121	17.7154	C7H16N2O2	6	N6-Methyl-L-lysine	8	877353	posneg	24	Amino Acid Metabolism	0	1	1.26675	0.385517	1	1.2842	0.979956	0.341137	-1.37513	0.360865	-0.0292117	472521	321916	877353	557185	794318	766244	166292	285693	192519	203789	126475	140901	218057	109981	277031	131364	136114	194242
129.079	11.9037	C6H11NO2	9	L-Pipecolate	8	867918	posneg	24	Amino Acid Metabolism	Lysine degradation__Alkaloid biosynthesis II	1	0.97493	0.778539	1	1.06085	1.43231	-0.0366301	-0.361159	0.0852221	0.518345	867918	732865	719086	848724	811557	601427	532728	676558	596821	40302.9	82682.1	44616.8	43609.8	85614.9	48575.9	61333.3	79490.9	99233.9
131.095	12.3056	C6H13NO2	12	(3R)-beta-Leucine	8	845759	neg	24	Amino Acid Metabolism	Valine, leucine and isoleucine degradation	1	1.01824	0.779379	1	1.18683	0.841038	0.0260782	-0.359604	0.24711	-0.249756	566784	468510	564914	539118	458721	631557	421734	433089	392346	699737	578960	670695	724256	743577	845759	456937	562767	619811
117.043	9.25321	C4H7NO3	5	L-2-Amino-3-oxobutanoic acid	8	839797	neg	24	Amino Acid Metabolism	Glycine, serine and threonine metabolism	1	1.18675	0.814375	1	1.16991	0.882595	0.247021	-0.296235	0.226398	-0.180177	544072	619378	570003	713232	504154	839797	405543	526573	479566	336763	282081	340042	335005	388915	397890	284237	277066	285006
156.053	10.1905	C6H8N2O3	4	4-Imidazolone-5-propanoate	8	836836	posneg	24	Amino Acid Metabolism	Histidine metabolism	1	0.562306	0.625422	1	1.16422	1.01329	-0.830574	-0.677098	0.21936	0.0190413	798891	836836	817843	573839	397582	408235	477551	446491	610475	50537.5	51962.9	52879	42883.3	62626.3	75385.7	50966.8	45312.3	61164.6
103.063	11.7812	C4H9NO2	15	N,N-Dimethylglycine	8	831813	neg	24	Amino Acid Metabolism	Glycine, serine and threonine metabolism	1	0.497371	0.722213	1	1.06792	0.901778	-1.0076	-0.469504	0.0948094	-0.149156	831813	651525	634306	361180	286602	405474	492612	424445	612333	231584	234059	234352	208400	269151	269990	215255	211162	204823
161.069	8.84114	C6H11NO4	10	O-Acetyl-L-homoserine	8	780825	negpos	24	Amino Acid Metabolism	Methionine metabolism__Sulfur metabolism	1	0.637021	0.610812	1	0.943631	0.988125	-0.650587	-0.711199	-0.0837051	-0.0172346	780825	602512	686326	588917	420380	309123	320092	412784	531300	42339.7	44549.9	45984.9	36148.2	40897	48339.4	48567.1	40190.8	42538.7
187.121	7.1536	C9H17NO3	3	8-Amino-7-oxononanoate	8	701137	pos	24	Metabolism of Cofactors and Vitamins	Biotin metabolism	1	0.706102	0.447541	1	1.59175	0.884865	-0.502051	-1.15991	0.670616	-0.176471	345576	531490	225905	240239	357540	181031	154240	170152	169233	188998	221179	206229	115966	164062	701137	251578	146452	147406
200.977	14.2103	C3H7NO5S2	1	S-Sulfo-L-cysteine	8	612240	negpos	24	Amino Acid Metabolism	Cysteine metabolism	1	0.919316	0.822209	1	1.06777	0.96926	-0.121368	-0.282424	0.094601	-0.045044	555928	504542	612240	471310	459161	607278	432226	493648	449442	251099	241360	232891	183617	284338	306552	227085	224664	251305
74.0367	8.379	C3H6O2	7	Propanoate	8	585589	neg	24	Carbohydrate Metabolism	Propanoate metabolism__Ethylbenzene degradation__Nicotinate and nicotinamide metabolism	1	1.09639	1.26819	1	0.904676	0.9954	0.132767	0.342767	-0.144527	-0.00665224	388388	312448	413464	418677	435954	367081	392765	585589	434786	467884	440394	377843	351759	424006	387758	467604	359834	452766
173.069	7.35968	C7H11NO4	6	N-Acetyl-L-glutamate 5-semialdehyde	8	562896	pos	24	Amino Acid Metabolism	Arginine and proline metabolism	1	0.934913	0.829414	1	0.337916	1.1151	-0.0970961	-0.269835	-1.56526	0.157174	470820	256134	256772	230832	562896	125971	272679	265159	278079	299943	184772	167377	7586.27	203210	9556.82	324724	239745	162679
159.09	11.104	C7H13NO3	10	5-Acetamidopentanoate	8	530873	pos	24	Amino Acid Metabolism	Lysine degradation	1	0.775707	0.898013	1	0.971676	1.01425	-0.366417	-0.155192	-0.0414522	0.0204073	401917	530873	402547	358740	382657	294432	371299	441089	386762	154075	158690	149164	106403	197767	144676	151067	164092	153351
112.027	8.14464	C4H4N2O2	2	Uracil	8	491922	negpos	24	Nucleotide Metabolism	Pyrimidine metabolism__beta-Alanine metabolism__Pantothenate and CoA biosynthesis	1	0.656324	1.21015	1	1.3853	1.29625	-0.60752	0.275182	0.470202	0.374348	175045	260282	491922	206833	153338	248404	301773	430476	389857	66424.7	51902.4	76082.6	75839.9	89543.6	103933	90186.7	97198.2	64619.3
136.052	11.5337	C8H8O2	16	Phenylacetic acid	8	439480	neg	24	Amino Acid Metabolism	Phenylalanine metabolism__Styrene degradation	1	0.824079	0.884938	1	1.07831	1.07665	-0.279146	-0.176351	0.108773	0.106545	282977	236584	439480	352253	177790	260282	214296	329124	305273	50535	69579.7	45801.5	59515.1	65625.2	53768.8	56243.8	56079.3	66310
246.133	10.2068	C9H18N4O4	2	N2-(D-1-Carboxyethyl)-L-arginine	8	434379	pos	24	Amino Acid Metabolism	Arginine and proline metabolism	1	0.913433	1.04466	1	0.999886	1.11155	-0.130629	0.0630268	-0.000164905	0.15257	209328	215161	221608	172764	184663	232739	243759	240594	190596	303048	385335	382843	318486	330191	422428	408551	347790	434379
145.158	19.9216	C7H19N3	1	Spermidine	8	389417	pos	24	Amino Acid Metabolism	Arginine and proline metabolism__beta-Alanine metabolism__Glutathione metabolism	1	0.605342	0.810273	1	1.21147	2.14427	-0.724178	-0.30352	0.27676	1.10049	90118.9	380211	377637	215938	161237	136134	227223	372159	87702.1	99140.6	74545.2	295588	81922.5	171718	314871	368745	331039	306469
145.158	21.6403	C7H19N3	1	Spermidine	8	374786	pos	24	Amino Acid Metabolism	Arginine and proline metabolism__beta-Alanine metabolism__Glutathione metabolism	1	0.555634	0.807034	1	1.56473	2.7151	-0.847794	-0.309299	0.645909	1.44101	76657.1	361536	374786	183578	150781	117360	224306	361912	69884.2	80478.4	59656.3	216035	94126.9	164034	299146	346750	293539	326749
146.058	11.6958	C6H10O4	16	(S)-2-Aceto-2-hydroxybutanoate	8	361414	neg	24	Amino Acid Metabolism	Valine, leucine and isoleucine biosynthesis	1	1.09487	0.413793	1	0.81505	0.754223	0.130761	-1.27302	-0.295039	-0.406937	296450	183519	192136	361414	212301	162153	71833.7	74641.7	131637	19852	16267.6	35485.8	16253	19682.9	22426.1	17493.2	20428.5	16084.8
130.027	12.4098	C5H6O4	7	Itaconate	8	344528	neg	24	Carbohydrate Metabolism	C5-Branched dibasic acid metabolism	1	0.883362	0.682127	1	1.19595	0.878807	-0.178923	-0.551889	0.258157	-0.186382	241943	331464	294169	344528	200731	221124	157114	236737	197945	103883	66374	86770	98746.7	86238.1	122407	74314.4	72549.1	79013.9
87.032	12.9186	C3H5NO2	3	2-Aminoacrylate	8	334156	pos	24	Amino Acid Metabolism	Cysteine metabolism	1	0.737807	0.62514	1	1.09278	1.06132	-0.438684	-0.677748	0.127999	0.0858662	240024	268405	334156	297622	139819	184225	62646.4	238443	225645	34660.3	28149	35863.2	31941.1	33844	42041.9	35559	29019.8	40144.8
148.074	8.51292	C6H12O4	14	[FA methyl,hydroxy(5:0)] 3R-methyl-3,5-dihydroxy-pentanoic acid	8	316538	negpos	24	Lipids: Fatty Acyls	Fatty Acids and Conjugates	1	0.445418	0.536039	1	1.04346	0.902209	-1.16677	-0.899591	0.0613737	-0.148466	287674	299416	316538	168479	122045	111968	135261	134139	214979	11727	12225.2	13591.4	13602.5	14374.6	11198.1	11131.9	10831.4	11908.9
138.043	8.32921	C6H6N2O2	3	Urocanate	8	291693	pos	24	Amino Acid Metabolism	Histidine metabolism	1	0.990499	0.862675	1	0.210382	0.235339	-0.0137723	-0.213112	-2.24892	-2.08719	60607.4	70486.7	57847.6	49957.9	57018.7	80170.1	56978.2	52677.2	53339.9	67487.4	264287	291693	39820.6	36678.4	54667.2	52849.9	42431.1	51445.4
145.11	8.82041	C7H15NO2	6	3-Dehydroxycarnitine	8	270738	pos	24	Amino Acid Metabolism	LysineDegradation	1	0.794216	0.77425	1	0.791801	0.845258	-0.332397	-0.369129	-0.336791	-0.242536	270738	159330	189321	160449	179003	152476	160293	168935	150333	141665	137542	123894	93050.3	129950	96175.1	115245	119765	105713
160.085	10.77	C6H12N2O3	4	N-gamma-Acetyldiaminobutyrate	8	267763	posneg	24	Amino Acid Metabolism	Glycine, serine and threonine metabolism	1	0.705358	0.664188	1	1.28641	0.784496	-0.503572	-0.590336	0.363349	-0.350161	267763	194940	234791	194116	123812	174055	128594	151409	183264	50118.4	101719	67880.6	72939.1	92266.3	117441	39610.2	74291.6	58465.8
132.09	19.897	C5H12N2O2	6	D-Ornithine	8	240967	neg	24	Amino Acid Metabolism	D-Arginine and D-ornithine metabolism	1	0.825705	0.83058	1	1.06954	0.942543	-0.276301	-0.267809	0.0969959	-0.0853695	214083	200712	240967	183753	144021	213693	172071	203413	169179	79445.5	78149.5	79027.3	72594.6	82397.6	98085.8	69754.5	76991.5	76280.7
376.138	7.92911	C17H20N4O6	2	Riboflavin	8	237046	pos	24	Metabolism of Cofactors and Vitamins	Riboflavin metabolism	1	0.856635	0.6307	1	1.06852	1.47125	-0.223248	-0.664974	0.0956188	0.557047	170413	163787	231687	237046	116784	130929	95381	151460	110064	15296.4	9284.64	13817.3	8845.15	17053.1	15131.3	20468.2	12011.1	24014.4
140.059	8.64365	C6H8N2O2	7	Methylimidazoleacetic acid	8	234720	pos	24	Amino Acid Metabolism	Histidine metabolism	1	0.779582	0.885879	1	1.00926	0.866624	-0.359227	-0.174818	0.0132944	-0.206521	197381	203724	188449	43292.7	181594	234720	166829	186452	168993	108272	90013.8	100353	81827.8	109515	110060	78887.2	86327.9	93591.8
158.044	12.6299	C4H6N4O3	3	Allantoin	8	208895	neg	24	Nucleotide Metabolism	0	1	1.15934	0.928009	1	1.05521	1.00424	0.213306	-0.107789	0.0775366	0.0061044	114333	137093	124424	102948	123896	208895	114064	129605	105123	151433	132015	162493	138699	156357	175507	168338	128461	151033
163.067	13.1848	C6H13NO2S	6	S-Methyl-L-methionine	8	180084	pos	24	Amino acid Metabolism	S-methylmethionine cycle __ dimethylsulfoniopropionate biosynthesis II (Spartina) __ dimethylsulfoniopropionate biosynthesis I (Wollastonia) __ methionine biosynthesis II __ superpathway of lysine, threonine and methionine biosynthesis II	1	1.03028	0.785983	1	1.36309	0.950225	0.0430394	-0.34743	0.446885	-0.0736589	111369	142747	115094	108100	92207.3	180084	89491.6	115783	84918.5	51488.4	55297.3	52501.3	57346.8	76222.3	83554	40896.8	60090.8	50370.8
127.063	12.4637	C6H9NO2	7	2,3,4,5-Tetrahydropyridine-2-carboxylate	8	174385	neg	24	Amino Acid Metabolism	Lysine degradation	1	1.14453	0.862835	1	1.17119	0.98341	0.194749	-0.212843	0.227978	-0.0241347	138943	125883	106940	174384	116003	135108	96369.3	113871	110532	57539.7	44856.6	56439.1	61395.8	66025.4	58605.6	40170.6	59174.3	56855.5
499.297	3.60061	C26H45NO6S	3	[ST hydrox] N-(3alpha,7alpha-dihydroxy-5beta-cholan-24-oyl)-taurine	8	173519	neg	24	Lipids: Sterol lipids	Bile acid biosynthesis	1	1.01214	0.903467	1	1.20173	1.63547	0.0174102	-0.146456	0.265118	0.709706	142881	159100	119459	173519	104176	148862	128230	142111	110417	50817.7	35895.3	54495.3	36859.6	74042.8	58792.4	81858.7	69828.3	79255.1
116.095	11.577	C5H12N2O	1	5-Aminopentanamide	8	171131	pos	24	Amino Acid Metabolism	Lysine degradation	1	0.911641	0.976745	1	0.961852	1.11731	-0.133462	-0.0339459	-0.0561133	0.160032	171131	74454.4	105369	105349	138236	76360.2	136452	104794	101547	81847.4	65275.7	62298.2	58325.9	82205.7	60900.7	91457.3	79050.4	63481.2
120.042	9.95077	C4H8O4	9	L-Erythrulose	8	166305	neg	24	Carbohydrate Metabolism	0	1	0.970236	1.0099	1	0.808294	0.90605	-0.0435918	0.0142143	-0.307048	-0.142337	134846	100691	97502.3	113356	89256.2	120515	109616	92237.5	134483	86314.5	79702.6	75727.6	64132.3	61100.6	70167.9	85004.5	65489.4	68538.9
138.043	9.96689	C6H6N2O2	3	Urocanate	8	165731	neg	24	Amino Acid Metabolism	Histidine metabolism	1	1.09624	1.01715	1	0.332867	0.296637	0.132558	0.0245329	-1.58698	-1.75323	40304.4	36570.9	38392.4	42258.6	43403.2	40698.8	38864.9	41623.8	36755.9	41658.5	165731	50645.6	24737.1	26336.7	34817.3	25068.3	24839.2	26635
148.019	4.43959	C5H8O3S	1	[FA oxo,methyl(4:0)] 2-oxo-4-methylthio-butanoic acid	8	163406	neg	24	Amino Acid Metabolism	Methionine metabolism	1	0.665576	0.196712	1	1.68837	0.975103	-0.587324	-2.34585	0.755629	-0.0363731	152309	163406	140610	113344	93391.6	96983.5	29152.9	35468.8	25142.7	24166.6	18189.9	17404.9	17843	44582.4	38473.9	13310	16234.7	28728.8
187.121	4.41101	C9H17NO3	3	8-Amino-7-oxononanoate	8	142449	neg	24	Metabolism of Cofactors and Vitamins	Biotin metabolism	1	0.791141	0.770565	1	1.78405	0.672028	-0.337994	-0.376012	0.835157	-0.573407	55091.1	70408.1	49444.9	44023.2	57553.1	36829	35247.1	53480.4	46078.2	33677.9	45731.2	27968.9	30386.3	18732.6	142449	22657.2	25008.5	24495.3
131.058	8.40525	C5H9NO3	14	N-Acetyl-beta-alanine	8	136247	neg	24	Amino Acid Metabolism	beta-Alanine metabolism	1	1.0011	0.787263	1	1.09434	0.912968	0.0015828	-0.345083	0.130058	-0.131363	136247	105924	111318	125789	103361	124728	90335.9	96366.3	91587	57092	49571.2	43530.7	51257.4	53007.6	60098	43469.6	47084	46568.6
522.991	14.3353	C10H16N5O14P3	6	GTP	8	131317	negpos	15	Nucleotide Metabolism	Purine metabolism__Riboflavin metabolism__Folate biosynthesis	1	0.749385	0.776565	NA	NA	NA	-0.416221	-0.364821	NA	NA	131317	83951.2	114952	109452	81435.4	56574.9	56842.8	69233.6	130361	0	0	0	0	0	0	0	0	0
264.111	4.47934	C13H16N2O4	4	Formyl-N-acetyl-5-methoxykynurenamine	8	104832	pos	24	Amino Acid Metabolism	Tryptophan metabolism	1	1.24085	0.819166	1	0.818551	0.9572	0.311331	-0.287772	-0.288856	-0.0631071	62707.7	77216.3	62283.5	104832	57562.1	88515.3	47967.5	65267.2	52406.8	47609.7	37834.7	42118.9	21705.4	40813.5	41898.1	32412.1	43675.7	46015.8
196.037	10.8213	C9H8O5	3	3-(3,4-Dihydroxyphenyl)pyruvate	8	100828	neg	24	Amino Acid Metabolism	Tyrosine metabolism	1	1.09578	0.883587	1	1.07268	1.03318	0.131956	-0.178556	0.101226	0.0470887	53617.6	59078.2	59418.9	43672.2	44099	100828	47432.6	65751.1	38894.6	25071.7	18457.2	24595.5	14728.1	22865.6	35482.2	20797.6	26515.9	23071
168.028	11.2029	C5H4N4O3	1	Urate	8	96608	neg	24	Nucleotide Metabolism	Purine metabolism	1	1.05255	0.81953	1	1.03273	0.82751	0.0738862	-0.287132	0.0464606	-0.273151	48630.5	46694.2	47188.8	37875	49551.1	62576.2	34819	43906	38069	91886.5	73541.2	90085.5	71524.7	96607.5	95743.5	62187.3	72198.7	77053.7
141.976	9.73852	C2H6O3S2	1	2-Mercaptoethanesulfonate	8	85770	neg	24	Metabolism of Cofactors and Vitamins	Folate biosynthesis	1	0.793948	0.930714	1	0.522943	0.993426	-0.332884	-0.10359	-0.935273	-0.00951503	72017.5	85769.8	33877.1	50908.3	49919.9	51343.3	63019.5	55639.9	59725.3	68593.3	60319.9	42427.6	7773.08	52023.7	29804.8	55795.9	44205.5	70213
129.09	20.1337	C5H11N3O	3	4-Guanidinobutanal	8	79519	pos	24	Amino Acid Metabolism	Arginine and proline metabolism	1	0.820324	0.781862	1	1.26511	0.975652	-0.285735	-0.355013	0.339257	-0.0355613	53233.9	63561.4	79519.4	58945.1	40140.1	61956.5	46878.7	60507.7	46104.7	32571.4	31567.5	33633.1	45297.7	36898.8	41495.5	29798.9	32832.5	32760.2
113.048	9.9014	C5H7NO2	6	1-Pyrroline-2-carboxylate	8	77571	pos	23	Amino Acid Metabolism	Arginine and proline metabolism__D-Arginine and D-ornithine metabolism	1	0.724522	0.90726	1	1.06178	1.15762	-0.464898	-0.140413	0.0864848	0.211168	49622	63987.4	46196.2	0	38211.8	77570.8	37654.6	61427.9	45902.6	29311.1	29558.6	33041.3	29558.8	31623.7	36406.7	35127.1	31089.8	40181.6
193.037	11.3764	C9H7NO4	4	L-Dopachrome	8	72334	pos	17	Amino Acid Metabolism	Tyrosine metabolism	1	1.75918	0	1	1.35086	0.699347	0.814902	NA	0.433883	-0.515919	0	34520.6	0	0	30336.3	30391.5	0	0	0	30438.6	40426.4	54938.5	44711.4	52898.2	72334	24221.8	35945.2	27813.4
123.983	12.9739	C2H4O4S	1	Sulfoacetaldehyde	8	62387	neg	24	Amino Acid Metabolism	Taurine and hypotaurine metabolism	1	0.86242	0.830601	1	1.22546	0.528104	-0.213538	-0.267772	0.293325	-0.921106	42886.3	27790.8	47878.8	30643.4	42136.8	29464.8	26393.3	37901.7	34177.6	30407.6	39250.1	44636.5	35853	41823.3	62386.9	14795.1	29122.7	16441.4
174.053	11.355	C7H10O5	7	Shikimate	8	58859	neg	24	Amino Acid Metabolism	Phenylalanine, tyrosine and tryptophan biosynthesis	1	0.959194	0.880029	1	0.909091	0.851236	-0.0601061	-0.184378	-0.137503	-0.23237	40048.7	46850	58859.1	43327.9	48665.7	47816.3	46636.3	34623.7	47011	24111.7	25642.4	29936.9	23550.8	25963.4	22932.1	19335.5	22660.4	25839.9
169.074	13.0408	C8H11NO3	4	L-Noradrenaline	8	57753	pos	24	Amino Acid Metabolism	Tyrosine metabolism	1	0.94948	0.783297	1	1.14427	1.56056	-0.0747904	-0.352368	0.194431	0.642063	28101.7	35938.1	43528.1	37022.5	25412.7	39698.3	26978.4	32249.1	25030.1	20025.8	19758	22947	18609.2	24513.8	28658.2	33578.1	30598.4	33718.7
164.069	10.7287	C6H12O5	25	L-Rhamnose	8	46775	neg	24	Carbohydrate Metabolism	Fructose and mannose metabolism	1	0.968431	0.685332	1	1.04071	0.953147	-0.0462794	-0.545126	0.0575745	-0.0692299	37327.3	38482.7	43786.3	33772.6	35273.2	46775	32382.4	25998.1	23582.6	20912.2	19205.9	18408.9	18281.5	18330.4	24298	18170.9	15143	22470.8
153.009	12.0339	C3H7NO4S	2	3-Sulfino-L-alanine	8	43426	neg	16	Amino Acid Metabolism	Cysteine metabolism__Taurine and hypotaurine metabolism	1	1.35152	0.789639	1	5.1281	1.31336	0.434579	-0.340734	2.35843	0.39326	24983.9	29220.9	0	29833	0	43425.6	21945.7	20856.5	0	4993.23	0	5801.13	16787.2	14141	24426.3	4706.77	4959.73	4510.35
425.587	8.67536	C26H44N7O17P3S	4	3-Methylbutanoyl-CoA	8	43166	neg	15	Amino Acid Metabolism	Valine, leucine and isoleucine degradation	1	0.414712	1.20852	NA	NA	NA	-1.26982	0.273239	NA	NA	37472.1	31514.9	25017.7	15637.4	10699.5	12647.9	30032.3	43166.4	40407.7	0	0	0	0	0	0	0	0	0
264.104	22.92	C12H16N4OS	1	Thiamin	8	39531	pos	24	Metabolism of Cofactors and Vitamins	Thiamine metabolism	1	0.924092	0.810885	1	1.1851	1.00446	-0.113891	-0.302431	0.245008	0.0064177	27774.9	34003.1	39531.1	36431.7	20290.6	36896.7	22437.7	34699.1	25013.2	7708.37	9281.41	7505.23	7500.79	9573.03	11955.2	7958.27	6926.92	9719.01
162.016	13.0679	C5H6O6	2	4-Hydroxy-2-oxoglutarate	8	37207	neg	24	Carbohydrate Metabolism	Glyoxylate and dicarboxylate metabolism	1	0.745683	0.608225	1	0.923449	0.737941	-0.423366	-0.717322	-0.114896	-0.438422	37207	35183.9	34620.7	27806.1	15917.1	36073.5	16366.8	23051.1	25669.3	13305.6	12413.6	11314.7	12097.2	13625.9	8475.8	9397.23	5287.98	12643.6
254.09	21.1455	C11H14N2O5	4	N-Ribosylnicotinamide	8	36416	pos	20	Metabolism of Cofactors and Vitamins	Nicotinate and nicotinamide metabolism	1	0.691555	0.905905	1	2.29854	1.75561	-0.532084	-0.142568	1.20072	0.811971	15514.4	27291.3	33474	19369	19739.7	13642.9	13057.1	36415.8	19629.3	808.668	0	0	0	892.308	966.448	719.956	699.749	0
137.084	11.6743	C8H11NO	7	Tyramine	8	30509	neg	24	Amino Acid Metabolism	Tyrosine metabolism__Alkaloid biosynthesis I	1	1.02708	0.843663	1	1.29042	1.52734	0.0385515	-0.245261	0.367841	0.611026	25005.5	15396.1	30421.1	30508.8	17073.9	25158	18972.8	19204.6	21573.1	5256.25	7839.54	5151.68	8019.98	8379.95	7146.97	10303.9	9723.28	7842.97
144.101	13.4414	C5H12N4O	1	4-Guanidinobutanamide	8	29706	pos	24	Amino Acid Metabolism	Arginine and proline metabolism	1	1.19339	1.41779	1	1.42138	1.63905	0.25506	0.503648	0.507293	0.712859	10967.9	10525.6	7952.23	13805.4	8289.2	13045.4	14117	13817.4	13813.6	7024.68	19213.2	15586.3	28797	16616.6	14034.5	16777.1	22069.3	29705.5
125.059	8.74014	C5H7N3O	4	5-Methylcytosine	8	24584	pos	24	Nucleotide Metabolism	Pyrimidine metabolism	1	0.947613	0.89064	1	1.04893	1.23997	-0.0776307	-0.167086	0.0689243	0.31031	16545.6	18653.2	23738.8	17322.3	14701.7	23826	12939.3	24584.1	14968.8	14982.1	20285.3	9983.14	9959.71	21892.6	15612.5	13129.6	22210	20769.8
162.1	17.0955	C6H14N2O3	6	N6-Hydroxy-L-lysine	8	23970	neg	24	Amino Acid Metabolism	Lysine degradation	1	1.28167	1.30696	1	1.02059	0.870758	0.358023	0.38622	0.0293989	-0.199656	16199.2	11719.3	16932.5	23969.7	12366.7	21147.8	15340.6	21283.8	21994.4	2564.13	2218.94	1907.42	2339.3	2354.45	2134.47	1507.67	2170.79	2147.33
204.147	15.1987	C9H20N2O3	1	3-Hydroxy-N6,N6,N6-trimethyl-L-lysine	8	12473	pos	24	Amino Acid Metabolism	Lysine degradation	1	0.977938	0.867912	1	1.14787	0.961457	-0.0321853	-0.20438	0.198963	-0.0567055	12173.9	8453.4	10232.1	10769	6936.71	12472.8	6669.27	10745.7	9368.24	2885.76	3807.39	2703.4	3610.21	3478.89	3696.95	2524.26	3025.67	3484.45
260.038	7.12452	C26H20N2O6S2	1	Bathocuproine disulfonic acid	7	151063696	negpos	24	Medium Component	0	1	0.864197	0.75815	1	0.903661	0.910324	-0.210567	-0.399444	-0.146147	-0.135548	134555296	117208408	137089072	111554256	73427608	151063696	88657568	105644224	100507016	50264976	55048816	48502888	37994596	58029864	42973620	46167208	45867660	47988148
166.986	5.60483	C7H5NS2	1	2-Mercaptobenzothiazole	7	133863360	negpos	24	0	0	1	0.676719	1.01344	1	0.180241	1.39191	-0.563371	0.0192614	-2.472	0.477063	118135240	106843392	83040616	103865512	93554072	11022868	81535608	133863360	96760216	79413400	41802616	16806668	1.28987e+06	22824658	762812	79061552	28051208	85001960
122.048	7.15866	C6H6N2O	4	Picolinamide	7	124224168	posneg	24	0	Glycerophosphoinositols	1	1.05351	0.94816	1	1.17076	1.06481	0.0751993	-0.0767983	0.227445	0.090602	96041848	123744624	106937504	114097200	105884480	124224168	104498288	114645792	90642376	90153016	82002408	86356384	98185824	95437784	109031520	89895120	89552080	95819904
201.057	12.7567	C7H11N3O2S	1	Ovothiol A	7	82693760	posneg	24	0	0	1	1.13567	0.791379	1	1.59651	1.41885	0.183546	-0.337559	0.67492	0.504725	37907108	54164056	71942128	82693760	48116740	55454712	33480244	45807956	50508504	3746.82	9773.84	6478.26	10329.4	16558.6	5040.41	5078.75	9717.47	13579.3
129.152	17.8186	C8H19N	2	Tetraethylammonium	7	82202024	pos	24	0	0	1	0.710788	0.94933	1	0.473708	0.705641	-0.492509	-0.075019	-1.07793	-0.502993	60945352	82202024	48481356	60595420	62365068	13246889	58229012	59576336	64113484	15963136	23112288	14058046	3.25063e+06	17198256	4720878	12395052	12621321	12476806
85.0892	8.98385	C5H11N	1	Piperidine	7	73286000	pos	24	0	piperine biosynthesis	1	1.67857	1.79308	1	1.29	1.76304	0.747231	0.842437	0.367371	0.818066	12553731	12782339	11359536	23336116	15325939	22934026	19345788	22545616	23906632	5485374	28463542	7.16617e+06	10619453	30200870	12218120	20634652	26611570	25241338
260.038	4.37867	C26H20N2O6S2	1	Bathocuproine disulfonic acid	7	72413304	negpos	24	Medium Component	0	1	0.783388	0.759148	1	0.955816	0.942891	-0.352201	-0.397546	-0.0651954	-0.0848374	70794024	58148736	72413304	51539760	42539692	63660456	49268336	55183856	48406948	29531320	25686116	23572832	19151800	32154030	24003156	22630302	25415212	26245104
831.577	2.99195	C48H82NO8P	23	PC(40:7)	7	26840368	pos	24	Lipids: Glycerophospholipids	Glycerophosphocholines	1	0.914214	0.88307	1	0.58641	1.04352	-0.129396	-0.1794	-0.770017	0.0614578	24327890	22295632	26840368	25420920	20643650	21097142	20601476	23527254	20745020	44609.8	77578.8	47748.8	21602.8	44910.4	33139.9	43803.9	57816.4	75712.6
369.194	9.70845	C22H27NO4	2	Thalicsessine	7	25972034	pos	24	0	0	1	0.949245	0.938936	1	1.10623	1.03617	-0.0751474	-0.0909011	0.145648	0.0512608	21380168	23218494	22318976	19431944	18117262	25972034	21194428	23963164	17673794	13757832	13317045	12618073	11776875	15413017	16719524	13731456	13205141	14192050
193.074	4.3981	C10H11NO3	10	Gentioflavine	7	17063306	pos	24	0	0	1	1.08126	0.80235	1	1.32175	0.967571	0.112712	-0.317697	0.40245	-0.0475603	11227553	12792795	12661837	11654797	10944841	17063306	10402319	10078390	8951225	9315752	11286933	13043024	14762538	13956056	15752628	11797769	9666886	11089963
523.364	3.76488	C26H54NO7P	11	[PC (18:0)] 1-octadecanoyl-sn-glycero-3-phosphocholine	7	16924002	pos	24	Lipids: Glycerophospholipids	Glycerophosphocholines	1	0.561805	0.822814	1	0.701822	0.958114	-0.831859	-0.281362	-0.510824	-0.061731	16924002	15207893	14201515	10163764	8225720	7640859	10748964	12537420	14837375	824171	692323	643116	312414	571854	631393	587517	620153	861482
242.019	13.6382	C6H11O8P	2	D-myo-Inositol 1,2-cyclic phosphate	7	16197566	neg	23	0	0	1	1.16338	0.736681	1	3.65664	1.01049	0.218326	-0.440888	1.87052	0.0150594	10636154	8615403	11933601	16197566	10638820	9443893	5.96617e+06	8531906	8475433	2735.51	0	6748.36	10573	11811.1	12295	2277.69	3264.52	4041.18
325.371	7.137	C22H47N	1	di-n-Undecylamine	7	13596691	pos	24	0	0	1	9.32598	0.740457	1	0.969211	0.628959	3.22125	-0.433513	-0.0451167	-0.668961	829378	759967	731326	13596691	7568651	477176	398839	766651	552866	133437	95797.1	101260	113600	117022	89695.9	79953.8	72716.7	55196.4
835.609	3.1111	C48H86NO8P	28	PC(40:5)	7	12785682	pos	24	Lipids: Glycerophospholipids	Glycerophosphocholines	1	0.758336	0.958745	1	0.653144	0.948871	-0.39909	-0.0607814	-0.614528	-0.0757161	11258718	10632778	12785682	9753474	8.12737e+06	8416113	10355121	11686101	11205339	227943	206478	137153	78017.8	170701	124601	167030	183990	191329
326.133	12.457	C35H36N6O7	1	Asp-Phe-Trp-Trp	7	11539734	neg	24	Peptide(tetra-)	Hydrophobic peptide	1	1.36109	1.42675	1	0.955953	0.949057	0.444758	0.512735	-0.0649881	-0.0754329	3092060	2942068	2.58805e+06	3.58147e+06	4380644	3.77342e+06	4168885	3.34939e+06	4.78345e+06	8.19456e+06	7468621	7454303	8.27652e+06	6.74042e+06	7082301	7163487	7.02973e+06	7746599
370.308	3.00067	C22H42O4	3	2-monooleoylglycerol	7	11261782	pos	24	Lipids: Glycerolipids	Monoradylglycerols	1	0.074056	3.60799	1	0.0110237	1.05599	-3.75524	1.85119	-6.50325	0.0785981	119540	3019214	4638.13	4653.22	166873	61260.7	4929957	3095704	3.31566e+06	11261782	6.69973e+06	1.95357e+06	25086.6	160320	34131.9	8976836	5452928	6600397
116.084	4.36082	C6H12O2	24	Hexanoic acid	7	10509540	neg	24	Lipids: Fatty Acyls	OxidationofVeryLongChainFattyAcids	1	0.827163	0.86063	1	0.675277	0.990136	-0.273757	-0.216536	-0.566449	-0.0143017	10509540	8.3391e+06	9757681	9203812	8103497	6354774	7709264	8915474	7.99471e+06	8977483	8.02312e+06	5404971	5008645	5376814	4.7445e+06	6786811	5924863	9472891
174.101	11.2118	C7H14N2O3	5	N5-Ethyl-L-glutamine	7	9870469	posneg	24	0	0	1	0.567783	0.756919	1	1.04745	0.937891	-0.816589	-0.401789	0.0668861	-0.0925084	8637165	8464691	9870469	5475762	4.34168e+06	5496979	5.9731e+06	8030707	6412070	1.36341e+06	1.13721e+06	1.18461e+06	1.01248e+06	1.36319e+06	1.48445e+06	1.06185e+06	1083564	1.31093e+06
221.108	3.69371	C9H19NO3S	1	CAPS	7	8826627	neg	24	Medium Component	0	1	0.743903	0.821578	1	0.311003	1.29799	-0.426814	-0.283531	-1.685	0.37628	8826627	6.13169e+06	5112099	5.00578e+06	7.87575e+06	2.0489e+06	5.26393e+06	6042564	5.18291e+06	4.32815e+06	2.94199e+06	2.75292e+06	9915.21	3.05771e+06	49580.7	4.36052e+06	3550005	5099324
495.333	3.90019	C24H50NO7P	8	[PC (16:0)] 1-hexadecanoyl-sn-glycero-3-phosphocholine	7	8299830	pos	24	Lipids: Glycerophospholipids	Glycerophosphocholines	1	0.611232	0.92589	1	0.630953	0.862262	-0.710209	-0.111088	-0.664396	-0.213802	8299830	5.25358e+06	6.83926e+06	4.93606e+06	4.02781e+06	3.50078e+06	5129159	6.32473e+06	7.42747e+06	574313	484061	396116	216209	355492	346013	419502	336509	498140
122.048	11.5898	C6H6N2O	4	Isonicotineamide	7	7685406	posneg	24	0	0	1	0.653205	0.801777	1	1.01543	0.980798	-0.614392	-0.318726	0.0220855	-0.0279715	6.44549e+06	5221894	7685406	5606155	3.76838e+06	3.2668e+06	4.20774e+06	6387910	4.92097e+06	165272	177041	155919	165411	178249	162258	147794	171237	169634
324.1	4.10642	C19H16O5	3	[Fv Dimethoxy(9:1)] 5,6-Dimethoxy-[2'',3'':7,8]furanoflavanone	7	6998828	posneg	23	Lipids: Polyketides	Flavonoids	1	0.439914	0.71804	1	0.302189	1.8257	-1.18471	-0.477864	-1.72648	0.868454	1059050	375775	179666	180285	529953	0	368580	319650	471039	6.27081e+06	1.79887e+06	1134555	5964.62	2769131	6319.64	6.23664e+06	3.56875e+06	6.99883e+06
702.568	3.24615	C39H79N2O6P	3	[SP (16:0)] N-(hexadecanoyl)-sphing-4-enine-1-phosphocholine	7	6072469	pos	24	Lipids: Sphingolipids	Ceramide phosphocholines (sphingomyelins)	1	0.994973	0.953066	1	0.763786	1.11577	-0.00727104	-0.0693524	-0.38876	0.158039	4.77461e+06	4.75659e+06	5.32741e+06	6072469	3.85469e+06	4.85675e+06	4.49115e+06	4.96814e+06	4701945	263494	256652	282195	83627.6	344207	184982	294945	304083	296200
297.09	7.16479	C11H15N5O3S	2	5'-methylthioformycin	7	5508761	pos	15	0	0	1	0.365352	0.860577	NA	NA	NA	-1.45264	-0.216623	NA	NA	5.50876e+06	4297815	5460565	2.21641e+06	1.99004e+06	1.37144e+06	3.67262e+06	4.17043e+06	5.2955e+06	0	0	0	0	0	0	0	0	0
153.994	7.13921	C3H6O5S	1	3-sulfopropanoate	7	5222359	neg	24	0	0	1	0.85956	0.960325	1	0.925926	1.14632	-0.218329	-0.0584059	-0.111031	0.197007	4.42129e+06	3.32716e+06	4.41211e+06	3.97298e+06	3.33927e+06	3140479	4352158	3.74268e+06	3583240	4642550	4.17504e+06	3.49887e+06	3.33475e+06	4.14122e+06	3.92816e+06	4827076	4.92943e+06	4362070
144.115	3.79927	C8H16O2	23	[FA (8:0)] octanoic acid	7	4827882	neg	24	Lipids: Fatty Acyls	Fatty acid biosynthesis	1	0.76069	0.691155	1	0.544435	1.01577	-0.394619	-0.53292	-0.877169	0.0225738	4827882	2.32987e+06	3.06091e+06	2.8842e+06	2.52632e+06	2.36272e+06	2.05553e+06	2695521	2.31163e+06	2.67287e+06	3506418	1.46598e+06	1.33265e+06	1544904	1.2848e+06	2.27535e+06	1.8763e+06	3.61418e+06
523.364	7.10346	C26H54NO7P	11	LysoPC(18:0)	7	4479332	pos	24	Lipids: Glycerophospholipids	Glycerophosphocholines	1	0.829143	0.755003	1	0.529513	0.652281	-0.270307	-0.405446	-0.917262	-0.616435	1.28329e+06	896800	866852	1.23381e+06	494356	798189	569029	881794	849631	56669.2	58516.3	27668.2	21312.1	32986.4	21344.5	18243.7	32307.8	42629.2
173.043	10.9951	C5H7N3O4	1	L-azaserine	7	4094868	neg	24	0	0	1	1.02713	0.786329	1	1.06764	0.898758	0.0386172	-0.346795	0.0944195	-0.153996	2975766	3358604	3.63094e+06	3.75026e+06	2390535	4.09487e+06	2401549	2.9931e+06	2.44136e+06	1.36869e+06	1.3067e+06	1.18779e+06	1.01349e+06	1.42358e+06	1.68739e+06	1.16905e+06	1.0976e+06	1.20541e+06
130.099	4.19674	C7H14O2	21	[FA methyl(6:0)] 2-methyl-hexanoic acid	7	4040148	neg	24	Lipids: Fatty Acyls	Fatty Acids and Conjugates	1	0.829272	0.867917	1	0.607161	1.0435	-0.270082	-0.20437	-0.71985	0.0614303	4.04015e+06	2.65893e+06	3064518	3.10363e+06	2.89317e+06	2.09988e+06	2579116	2.99823e+06	2.89664e+06	3.06962e+06	2.26041e+06	1.97476e+06	1123995	1.98668e+06	1.3245e+06	2.49641e+06	2.12539e+06	3000744
912.573	2.81775	C49H85O13P	23	PI(40:5)	7	3451647	neg	22	Lipids: Glycerophospholipids	Glycerophosphoinositols	1	0.778752	1.00835	1	1.54342	1.84494	-0.360765	0.0119972	0.626134	0.883577	3269434	2.97739e+06	3.40325e+06	2630967	2.69384e+06	2.1902e+06	2.96641e+06	3.3126e+06	3.45165e+06	0	4766.78	5166.18	0	9436.38	5894.4	6442.87	5308.05	6574.85
217.132	8.76908	C10H19NO4	1	O-Propanoylcarnitine	7	2708252	pos	24	Lipids: Fatty Acyls	OxidationofBranchedFattyAcids	1	0.985845	0.777	1	1.0345	1.06131	-0.0205672	-0.364013	0.0489303	0.0858523	2.16221e+06	1.6678e+06	2293751	2708252	1.63307e+06	1.69576e+06	1.35984e+06	1972402	1.42592e+06	155915	77704.9	222850	145939	144510	181769	143180	124074	217205
133.074	7.34148	C5H11NO3	4	N-hydroxyvaline	7	2698808	pos	24	0	superpathway of linamarin and lotaustralin biosynthesis __ linamarin biosynthesis	1	0.432669	0.986166	1	0.457197	0.380332	-1.20866	-0.0200975	-1.12911	-1.39467	2.69881e+06	1.17019e+06	2.44777e+06	1.06143e+06	898916	772724	1.87985e+06	1.92134e+06	2.42819e+06	13633	22352.5	54556.1	21421.9	13626.3	6347.13	10613.3	10555.8	13266.8
394.105	7.18667	C22H18O7	5	Justicidin A	7	2616723	neg	23	0	0	1	1.0244	0.902466	1	0.281331	1.04123	0.034779	-0.148056	-1.82966	0.0582841	1.30944e+06	925057	754344	996196	1.34535e+06	720224	854452	961613	881265	819176	502839	401360	0	435332	49507.7	504659	544745	745021
537.512	3.16318	C34H67NO3	4	[SP (16:0)] N-(hexadecanoyl)-sphing-4-enine	7	2303618	negpos	15	Lipids: Sphingolipids	Ceramides	1	0.947562	1.02298	NA	NA	NA	-0.0777072	0.0327798	NA	NA	1.81745e+06	1.93939e+06	2.30362e+06	1.94837e+06	1.83938e+06	1.95492e+06	2.1131e+06	2.21461e+06	1.87203e+06	0	0	0	0	0	0	0	0	0
269.105	4.43471	C16H15NO3	1	alpha-(p-Methoxyphenyl)-6-methyl-2-pyridineacrylic acid	7	2246610	pos	24	0	0	1	0.661896	0.672147	1	1.03092	0.82566	-0.595323	-0.573152	0.0439273	-0.276381	2013769	1.58771e+06	2246610	1.67421e+06	1.20102e+06	995606	1.21119e+06	1.51411e+06	1.20547e+06	175924	163401	159830	125072	194078	195437	117377	157795	136959
73.0893	17.0282	C4H11N	5	2-Methylpropanamine	7	1764861	pos	24	0	0	1	0.716063	0.850172	1	0.789173	0.84746	-0.481842	-0.234173	-0.341586	-0.238783	1.37884e+06	1.76486e+06	986239	1.23881e+06	1.17837e+06	540121	921760	1.20085e+06	1.38855e+06	636825	742202	581702	464598	637116	445641	542037	553736	565866
270.219	3.34149	C16H30O3	19	[FA oxo(16:0)] 3-oxo-hexadecanoic acid	7	1709895	posneg	24	Lipids: Fatty Acyls	Fatty Acids and Conjugates	1	0.797889	0.814313	1	1.12744	1.10117	-0.325739	-0.296345	0.173047	0.139038	917973	762413	609123	586914	645137	594723	624318	649239	590819	728248	642714	563104	666858	732222	781458	669596	670127	790013
206.167	3.55367	C14H22O	6	[PR] (+)-15-nor-4-thujopsen-3-one	7	1624984	neg	24	Lipids: Prenols	Isoprenoids	1	0.690783	1.00969	1	0.641485	1.27889	-0.533694	0.0139183	-0.640513	0.354893	1051897	1.08134e+06	1.01453e+06	736696	897786	539944	741405	1.41415e+06	1.02273e+06	1.31826e+06	801091	682119	378676	888111	530312	1102725	855061	1.62498e+06
231.147	7.94431	C11H21NO4	3	O-Butanoylcarnitine	7	1583330	pos	24	Lipids: Fatty Acyls	Fatty acyl carnitines	1	0.958546	1.00097	1	1.07201	1.02146	-0.0610804	0.00139214	0.10032	0.0306374	1310585	1.12342e+06	1.28548e+06	1.58333e+06	1.09076e+06	891204	909395	1.36124e+06	1.45244e+06	57644.9	38971.3	56724.2	34380.5	63993.4	66008.8	53507.4	42709.2	60415
281.272	3.4913	C18H35NO	2	[FA (18:1)] 9Z-octadecenamide	7	1569706	pos	24	Lipids: Fatty Acyls	Fatty amides	1	0.480884	0.49065	1	0.386638	0.745481	-1.05624	-1.02723	-1.37094	-0.423757	1.56971e+06	945134	815480	896682	292014	412801	513688	519672	600660	272705	348838	228930	147284	144007	37534.1	241208	127704	265099
95.988	12.7282	CH4O3S	1	Methanesulfonic acid	7	1558014	neg	24	0	dimethylsulfide degradation II (oxidation) __ methanesulfonate degradation	1	1.06055	1.07531	1	1.03748	0.993712	0.0848067	0.104749	0.0530786	-0.0090996	1.18733e+06	1278351	1164492	1.0755e+06	1.35494e+06	1.41953e+06	1.41622e+06	1.22773e+06	1.2596e+06	1.27973e+06	1.28269e+06	1.14051e+06	1.24108e+06	1.28442e+06	1.31621e+06	1.1121e+06	1333088	1.23447e+06
174.137	16.4494	C8H18N2O2	1	Ne,Ne dimethyllysine	7	1409141	posneg	24	0	0	1	1.05251	0.310662	1	1.41211	1.18376	0.0738381	-1.68658	0.497851	0.24338	456019	469644	1409141	654037	1.09598e+06	707398	167088	362042	196204	92033.3	65405.7	116298	108477	84554.1	193515	98170.8	113900	111969
278.152	3.45614	C16H22O4	7	2-Ethylhexyl phthalate	7	1377102	pos	24	0	0	1	1.16252	0.958931	1	1.01698	1.16009	0.217258	-0.0605013	0.0242929	0.214235	503241	699405	694849	619433	922936	663510	821938	469913	527715	644380	1.09613e+06	679947	877928	731734	851899	810183	908159	1.0896e+06
168.079	3.88573	C9H12O3	3	1,3,5-trimethoxybenzene	7	1266992	posneg	24	Biosynthesis of Secondary Metabolites	1,3,5-trimethoxybenzene biosynthesis	1	1.03893	0.760399	1	1.17077	1.02616	0.0551053	-0.395171	0.227456	0.0372555	1.18544e+06	683012	1.20328e+06	1.05198e+06	872358	1.26699e+06	862914	768958	703874	841320	830820	797303	831092	922150	1.1379e+06	787872	924634	821537
294.183	3.39335	C17H26O4	3	[6]-Gingerol	7	1219478	neg	24	0	0	1	0.971091	0.737381	1	0.653638	0.997605	-0.0423211	-0.439518	-0.613437	-0.00346005	588171	1.21948e+06	903391	729554	725699	1177414	740964	689638	568467	435459	848184	392449	417850	309825	367882	354272	651820	665985
400.099	12.6496	C14H20N6O4S2	1	Ovothiol A disulfide	7	1138792	pos	15	0	0	1	1.29797	0.632562	NA	NA	NA	0.376257	-0.660721	NA	NA	410042	435040	758868	1.13879e+06	506957	436129	230912	347125	436562	0	0	0	0	0	0	0	0	0
121.089	4.32528	C8H11N	6	N,N-Dimethylaniline	7	1030218	pos	24	0	0	1	0.67588	0.598565	1	0.887419	0.833257	-0.565162	-0.740421	-0.172313	-0.263167	1.03022e+06	447471	658940	508629	473128	462348	373754	460695	444462	510973	325956	413008	296850	421040	391328	336057	363555	341907
140.084	4.01926	C8H12O2	14	2-Methyl-6-oxohepta-2,4-dienal	7	1028700	pos	24	0	0	1	1.02855	0.93798	1	1.34235	0.846429	0.0406132	-0.0923704	0.424758	-0.240539	639975	526050	669881	633414	556269	698639	595588	563450	563006	551792	669338	792877	757494	917304	1.0287e+06	576917	610851	516946
208.052	13.0634	C6H12N2O4S	2	Cys-Ser	7	1006738	posneg	23	Peptide(di-)	Polar peptide	1	0.824678	0.664047	1	1.2443	0.695974	-0.278097	-0.590642	0.315331	-0.522895	792819	632676	922031	1.00674e+06	552477	376740	354952	609869	594048	2906.15	5167.52	5195.3	4390.5	5549.41	6570.64	0	5628.35	3606.51
569.348	3.64796	C30H52NO7P	2	LysoPC(22:5(4Z,7Z,10Z,13Z,16Z))	7	929120	pos	15	Lipids: Glycerophospholipids	Glycerophosphocholines	1	0.61104	0.765593	NA	NA	NA	-0.710661	-0.38535	NA	NA	740502	877142	929120	640714	510459	405002	570709	693779	685298	0	0	0	0	0	0	0	0	0
166.027	11.8145	C8H6O4	7	Phthalate	7	922694	neg	24	Xenobiotics Biodegradation and Metabolism	2,4-Dichlorobenzoate degradation__Naphthalene and anthracene degradation__Fluorene degradation	1	0.863471	0.795341	1	1.01138	1.03424	-0.21178	-0.330355	0.016325	0.0485672	566418	736044	922694	633844	505678	781836	642283	459591	667884	338747	227063	349241	309923	455941	159600	271324	284035	391021
249.086	7.29137	C10H19NO2S2	2	S-Acetyldihydrolipoamide	7	862465	pos	15	0	Alanineandaspartatemetabolism	1	1.17015	0.854872	NA	NA	NA	0.226697	-0.22622	NA	NA	589789	585617	675399	862465	690377	612882	439784	513610	628807	0	0	0	0	0	0	0	0	0
181.041	12.6562	C5H11NO4S	1	DL-Methionine sulfone	7	847626	negpos	24	0	0	1	0.82617	1.00444	1	1.07888	0.819302	-0.275489	0.00638501	0.109534	-0.287534	158608	107062	91411.9	81525.8	100781	112704	155092	115849	87725.8	472727	712431	463268	403406	847626	527421	428371	481072	441115
172.085	10.7624	C7H12N2O3	2	Glycylproline	7	689871	posneg	24	Peptide(di-)	Polar peptide	1	0.990303	0.837374	1	1.69829	1.02736	-0.0140577	-0.256055	0.764086	0.0389384	599090	510991	613758	689871	524934	492319	388723	554951	499825	31537.4	43782	35896	52150.4	74311.1	62414.8	36906.4	47385.6	29966
133.074	11.7045	C5H11NO3	4	1-deoxyxylonojirimycin	7	654736	posneg	24	0	0	1	0.640246	0.429425	1	1.21545	0.876243	-0.643303	-1.21952	0.281495	-0.190598	654736	518548	390147	337492	343434	320053	210783	238906	221687	217246	424141	306967	276502	558340	317837	211777	268133	351078
201.137	4.39411	C10H19NO3	2	Capryloylglycine	7	561446	pos	20	0	0	1	1.03018	0.820386	1	0.498438	0.909493	0.0428918	-0.285625	-1.00451	-0.136866	561446	445555	0	485101	319501	232786	236431	297437	292262	290517	278085	235207	138982	147056	114611	215898	214265	300896
264.048	13.9869	C18H24O18	1	&Delta;4,5-unsaturated trigalacturonate	7	527025	neg	24	0	0	1	1.28541	0.727673	1	1.37955	0.911222	0.362224	-0.458637	0.464202	-0.134125	323479	394528	374425	527025	409149	468044	268476	284345	242112	161312	134208	124124	160422	215768	202731	124218	120896	137275
154.099	4.01777	C9H14O2	16	[FA (9:2)] 2,6-nonadienoic acid	7	512951	posneg	24	Lipids: Fatty Acyls	Fatty Acids and Conjugates	1	0.899051	0.794142	1	1.34084	0.997024	-0.153525	-0.332532	0.423137	-0.0043004	479618	435805	414103	434835	334495	425981	356002	356288	343542	315003	341673	358055	370011	512951	477631	288952	344854	377905
164.12	3.92972	C11H16O	5	Jasmone	7	507012	neg	24	Lipids: Fatty Acyls	Octadecanoids	1	0.831682	0.719633	1	0.923425	0.643392	-0.265897	-0.474666	-0.114934	-0.636229	262112	370830	175197	305359	238178	128578	164827	228379	188358	281888	433818	299870	219323	507012	211474	271591	169397	212426
296.235	3.31551	C18H32O3	40	[FA hydroxy(18:2)] 9S-hydroxy-10E,12Z-octadecadienoic acid	7	495021	neg	24	Lipids: Fatty Acyls	Linoleic acid metabolism	1	0.893709	0.698831	1	0.988348	1.07134	-0.162123	-0.516984	-0.0169091	0.0994148	472251	362258	451870	495021	358552	296076	291977	245043	361941	135640	117795	90828.1	73838.8	176103	90310.3	157449	78564.5	132809
200.08	9.76332	C8H12N2O4	2	Dihydroclavaminic acid	7	470975	posneg	15	Biosynthesis of Secondary Metabolites	Clavulanic acid biosynthesis	1	0.572736	0.836514	NA	NA	NA	-0.804058	-0.257539	NA	NA	441947	300010	470975	226948	233831	233910	293341	440006	281287	0	0	0	0	0	0	0	0	0
142.099	4.40771	C8H14O2	34	[FA (8:1)] 2Z-octenoic acid	7	443452	pos	24	Lipids: Fatty Acyls	Fatty Acids and Conjugates	1	1.10843	0.998384	1	1.24201	0.981253	0.148513	-0.00233325	0.31268	-0.0273035	191522	254480	177412	269336	286581	135090	250325	164179	207901	267669	269366	432909	443452	356020	405211	347835	345980	257945
310.12	4.20023	C19H18O4	3	[Fv] Ovalitenin B	7	412928	posneg	24	Lipids: Polyketides	Flavonoids	1	1.08867	0.982756	1	1.03871	1.1253	0.12257	-0.0250946	0.0547977	0.170308	145305	242335	131101	177994	171328	215417	177252	166896	165648	343682	357426	320874	284045	412928	364574	383629	380949	385457
405.138	13.3544	C15H23N3O10	1	Glu-Glu-Glu	7	381621	posneg	15	Peptide(tri-)	Acidic peptide	1	0.521545	0.455536	NA	NA	NA	-0.939136	-1.13436	NA	NA	189916	115119	381621	232339	60036.3	65746.8	60643.5	150829	101324	0	0	0	0	0	0	0	0	0
145.053	5.21594	C9H7NO	7	3-Methyleneoxindole	7	359319	posneg	24	0	0	1	1.47356	1.14691	1	0.906004	0.813532	0.559304	0.197752	-0.142411	-0.297729	273173	196715	163829	320016	254483	359319	225190	302147	199479	128605	144942	136786	97084.4	181354	93325.4	105149	106751	121919
100.053	4.05595	C5H8O2	18	5-Valerolactone	7	358131	neg	24	0	0	1	0.901298	0.863637	1	0.833264	0.917336	-0.149924	-0.211503	-0.263154	-0.124477	358131	258138	300238	284934	267951	273161	261801	287978	241750	272657	277273	250542	173348	259264	234392	215825	258294	260183
326.199	8.94677	C20H26N2O2	4	Ajmaline	7	355985	pos	24	Biosynthesis of Secondary Metabolites	Indole and ipecac alkaloid biosynthesis	1	3.04652	2.03376	1	0.929164	0.854905	1.60716	1.02415	-0.105994	-0.226165	72237.4	66514.5	118127	235599	355985	191003	152169	61535.4	308727	18866.1	292081	207750	66170.8	203183	212601	231371	191185	20880.4
162.053	23.671	C6H10O5	24	Lichenin	7	327972	neg	24	0	0	1	1.07353	1.02946	1	1.06921	0.63811	0.102357	0.04189	0.0965513	-0.648123	180489	228960	126085	166331	167854	240725	167179	221237	162896	255237	189389	316556	327972	205413	280482	181121	163334	141263
230.09	12.2839	C9H14N2O5	1	Aspartyl-L-proline	7	324154	pos	15	Peptide(di-)	Acidic peptide	1	0.679811	0.875505	NA	NA	NA	-0.556793	-0.191813	NA	NA	257291	272963	262438	236360	181384	121138	172748	197104	324154	0	0	0	0	0	0	0	0	0
243.122	10.6844	C10H17N3O4	2	Ala-Gly-Pro	7	315661	pos	15	Peptide(tri-)	Polar peptide	1	1.04948	0.658979	NA	NA	NA	0.0696689	-0.601695	NA	NA	282453	180547	274451	315661	208134	250142	124691	214003	147271	0	0	0	0	0	0	0	0	0
203.08	11.5519	C8H13NO5	2	2-acetamidoglucal	7	304097	pos	24	0	0	1	0.599683	1.1405	1	1.38743	1.0006	-0.737729	0.189662	0.472411	0.000866081	203855	212740	304097	189411	120089	122687	244368	278994	298584	21656.7	22206.2	31194.7	26669	38722	38746	26893.9	26512.2	21696.7
262.08	13.2226	C9H14N2O7	2	Glu-Asp	7	302795	neg	15	Peptide(di-)	Acidic peptide	1	0.496379	0.491955	NA	NA	NA	-1.01048	-1.0234	NA	NA	302795	157859	265016	190933	82488.5	86786.3	72802.8	129733	154462	0	0	0	0	0	0	0	0	0
188.116	7.87851	C8H16N2O3	7	Glycyl-leucine	7	294635	neg	24	Peptide(di-)	Hydrophobic peptide	1	0.670897	0.783815	1	1.30865	0.801502	-0.575837	-0.351415	0.38808	-0.319222	256239	184388	294635	219981	141984	131320	136173	236474	203662	6140.86	8516.97	6578.08	9879.53	9650.03	8260.81	4188.92	7969.46	4862.24
159.09	7.17772	C7H13NO3	10	3-Dehydrocarnitine	7	269067	pos	24	0	gamma-butyrobetaine degradation __ carnitine degradation II	1	0.8635	0.619524	1	1.09105	0.853401	-0.211733	-0.690767	0.125714	-0.228704	213738	189736	163791	137837	269067	82929.8	143964	140552	66918.6	95763	144098	101728	121705	162018	88966.3	110859	112985	67667.4
390.277	9.84782	C24H38O4	58	[ST hydrox] 3alpha,12alpha-Dihydroxy-5beta-chol-6-en-24-oic Acid	7	266530	pos	24	Lipids: Sterol lipids	Bile acids and derivatives	1	0.899344	1.1294	1	1.15112	1.16751	-0.153055	0.175551	0.203034	0.223436	196946	201488	230412	186301	204912	174338	205556	266530	238131	146310	170021	154653	189123	176563	176473	155111	171763	223007
309.169	10.1993	C15H23N3O4	2	Lys-Tyr	7	266163	pos	15	Peptide(di-)	Basic peptide	1	0.930296	0.646502	NA	NA	NA	-0.104238	-0.629273	NA	NA	176923	125584	203871	266163	107015	97902.6	81255.1	151538	94580.7	0	0	0	0	0	0	0	0	0
212.141	3.63188	C12H20O3	13	[FA oxo(12:1)] 12-oxo-10E-dodecenoic acid	7	263284	neg	24	Lipids: Fatty Acyls	Fatty Acids and Conjugates	1	0.73378	0.725203	1	0.68085	1.0751	-0.44658	-0.463544	-0.554591	0.104473	263284	223661	227883	194614	154229	175683	154369	194134	169892	244811	160187	105797	91773.2	135879	120123	225909	145427	177822
212.116	10.4068	C10H16N2O3	2	Pro-Pro	7	250856	pos	24	Peptide(di-)	Nonpolar peptide	1	0.984721	0.766646	1	0.934173	1.40775	-0.0222133	-0.383368	-0.098238	0.493388	217150	178959	227507	250856	166365	196867	130427	181466	166200	16091.8	14785.1	11504.5	12082	17075.2	10434.4	17585.8	20153.8	21922.8
156.079	3.97872	C8H12O3	2	[FA oxo(8:1)] 5-oxo-7-octenoic acid	7	240130	neg	24	Lipids: Fatty Acyls	Fatty Acids and Conjugates	1	0.859041	0.738107	1	1.14019	1.15377	-0.219202	-0.438098	0.189268	0.206361	240130	177744	214768	202068	157139	184258	140313	173074	153570	71000.3	149230	105962	109075	140371	122474	111182	129226	135945
136.039	11.8192	C5H4N4O	3	allopurinol	7	230054	neg	24	0	0	1	0.96568	0.748912	1	0.980511	0.849076	-0.0503832	-0.417132	-0.0283944	-0.236034	172380	190341	222638	217493	123621	224155	142660	169926	125796	145314	131702	137472	141864	79339.9	185207	114808	119217	117908
218.05	4.2421	C13H11OCl	2	p-Chlorobenzhydrol	7	220063	neg	17	0	0	1	0.15587	0.827332	NA	NA	NA	-2.68159	-0.273462	NA	NA	174786	36053.5	170030	33712.7	14082.1	11571	38390.1	56651.5	220063	0	0	0	12920.8	0	15462.5	0	0	0
202.084	4.37654	C9H14O5	1	Diethyl 2-methyl-3-oxosuccinate	7	215018	neg	24	0	0	1	0.763404	0.823311	1	0.780525	1.03271	-0.389482	-0.280491	-0.357484	0.0464397	215018	129677	175976	142781	174003	80698	172817	97197.5	158660	109534	53288.8	75513.9	41518.5	88459.5	56049.7	79677	93189.5	73267
325.08	11.2993	C14H15NO8	1	Pancratistatin	7	214388	pos	23	0	0	1	2.27318	0.604792	1	1.81274	1.32046	1.18471	-0.725488	0.858174	0.401042	98828	68913.6	64350.9	214388	177206	135992	96735.1	0	43632.6	26891.6	19978.6	25402.9	34386.2	59376	37250.3	25397.5	27480.7	42555.6
228.147	10.5767	C11H20N2O3	3	Ile-Pro	7	211236	pos	24	Peptide(di-)	Hydrophobic peptide	1	1.39299	0.839259	1	1.26343	0.921916	0.478185	-0.252811	0.337351	-0.117293	146188	96800.9	112862	123218	161242	211236	93807.3	112504	92339.9	97949.9	121704	87191.4	118575	147023	122080	72839.3	102926	107120
216.075	9.93478	C8H12N2O5	1	N3-(4-methoxyfumaroyl)-L-2,3-diaminopropanoate	7	210938	neg	15	0	0	1	0.519262	0.699639	NA	NA	NA	-0.945466	-0.515318	NA	NA	210938	154546	186089	123976	73727.3	88707.3	98874.5	140138	146889	0	0	0	0	0	0	0	0	0
530.47	3.08099	C35H62O3	2	[PR] 30-(-2-(O-2-hydroxy-ethane)-3-hydroxy-propane)-hopane	7	204197	neg	17	Lipids: Prenols	Hopanoids	1	0	2.8475	1	0.357568	1.30713	NA	1.50969	-1.48371	0.386399	0	61750.4	0	0	0	0	46658.9	60081.7	69093.4	163657	136155	73649.5	55678.9	48082.5	29776.5	204197	119890	164075
329.257	3.39884	C18H35NO4	2	4-8dimethylnonanoylcarnitine	7	197158	pos	24	Lipid Metabolism	OxidationofBranchedFattyAcids	1	0.779947	0.894586	1	0.845764	0.908969	-0.358552	-0.160708	-0.241672	-0.137697	171016	183158	193752	105795	172629	148930	196278	169067	124823	192214	180357	127683	109819	162084	151195	138593	131143	184979
242.152	3.61962	C13H22O4	1	2-isocapryloyl-3R-hydroxymethyl-&gamma;-butyrolactone	7	195501	neg	24	0	0	1	0.777482	0.643729	1	1.0475	1.2667	-0.36312	-0.635474	0.0669435	0.341076	195501	125292	78509.4	110144	119338	80968.7	64957.7	88384.8	103700	39405.3	91140.9	44566.8	53322.8	59062.3	71045	109137	52545.7	60132.9
368.345	3.79168	C27H44	1	[ST] (5Z,7E)-9,10-seco-5,7,10(19)-cholestatriene	7	189705	pos	24	Lipids: Sterol lipids	Secosteroids	1	1.31414	1.55905	1	1.38229	1.49632	0.394122	0.640668	0.467063	0.581418	86254.1	113819	89794.1	109677	139752	131499	125754	189705	136459	58705.1	139039	111068	101280	185473	140115	123342	183628	155112
251.101	11.6953	C9H17NO7	1	Muramic acid	7	187851	posneg	19	0	0	1	4.40159	0	1	2.00684	1.13056	2.13802	NA	1.00492	0.177043	107826	0	0	139512	147244	187851	0	0	0	55836.9	52308.1	66785.8	112835	144888	93335.4	49087.9	64539.8	84142.9
202.048	14.832	C8H10O6	1	cis-(homo)2aconitate	7	178874	neg	24	Metabolism of Cofactors and Vitamins	coenzyme B biosynthesis	1	1.06558	0.779088	1	1.14876	0.92405	0.091638	-0.360143	0.200081	-0.113957	133088	146781	146211	153020	122127	178874	101314	121211	109429	66545.8	63137.2	63515.2	55633.3	75477.4	90828.4	58313.3	56120.3	64091.2
284.199	3.4283	C16H28O4	1	(10S)-Juvenile hormone III diol	7	176444	neg	23	Biosynthesis of Secondary Metabolites	Insect hormone biosynthesis	1	0.715417	0.620749	1	1.04092	0.407235	-0.483143	-0.687917	0.0578627	-1.29607	148573	125002	176444	127142	116010	78798.6	46192.5	144701	88455.6	50204.9	48601.7	82677.1	57596	68303.5	63011	0	30727.4	43179.1
193.041	10.0461	C6H11NO4S	1	&gamma;-thiomethyl glutamate	7	175611	posneg	24	0	0	1	1.24872	0.74184	1	1.75144	1.00102	0.320449	-0.43082	0.808543	0.00146587	111734	88057.9	97600.6	175611	83776.5	111973	73285.1	80825	66507.8	14023.2	18913.6	32606.6	36154.1	43215	35426.4	25030.1	23366.8	17213.1
173.105	7.12599	C8H15NO3	5	N-Acetyl-L-leucine	7	171394	pos	24	0	0	1	1.62352	0.965521	1	1.41477	1.04973	0.699126	-0.0506209	0.500564	0.0700206	90002.2	69450	107426	171394	164355	97533.8	111737	94203.7	51736.4	84404.2	81218.1	71392	117745	92700.5	124874	65606.2	97371.4	85823.8
226.084	8.29128	C11H14O5	1	Genipin	7	171123	neg	24	0	0	1	0.866054	0.687332	1	0.870956	1.18623	-0.207472	-0.540921	-0.199328	0.246387	117035	98905.1	171123	168403	92440.7	74373.9	77191.9	113165	75683.8	3217.2	2087.34	3809.64	2382.29	2562.31	2993.46	3728.97	2870.07	4212.49
201.173	7.4183	C11H23NO2	2	[FA amino(11:0)] 11-amino-undecanoic acid	7	164259	pos	24	Lipids: Fatty Acyls	Amino Fatty Acids	1	0.885191	0.75712	1	1.00966	1.06255	-0.17594	-0.401405	0.0138715	0.0875351	164259	85215.4	83667.5	79878.9	133142	81873.6	78172.5	92042.8	82013.2	58553.4	61325.1	66703.3	42353	74126.7	71904.8	71717.1	43637.9	82898.1
152.059	5.68146	C7H8N2O2	3	N1-Methyl-2-pyridone-5-carboxamide	7	162708	pos	24	Metabolism of Cofactors and Vitamins	Nicotinate and nicotinamide metabolism	1	0.691947	0.672545	1	1.04696	1.26531	-0.531267	-0.572297	0.0662086	0.339492	162708	114630	129867	129320	92354.2	60089.9	55516.9	90243.9	128103	9705.02	9983.73	9381.19	12157.7	9923.18	8354.27	14797.9	12287.1	9697.48
267.056	10.7476	C12H13NO4S	1	Oxycarboxin	7	158336	posneg	24	0	0	1	4.75115	1.07621	1	4.49259	1.44694	2.24828	0.105964	2.16755	0.53301	22976	19950	29538.6	158336	92451.9	93502.3	35322.2	20664.2	22000.9	6207.41	10953.3	11594.5	37959.8	71658.8	19566.9	14516.2	11113.2	15977.9
267.096	11.9529	C9H17NO8	2	Neuraminic acid	7	155928	posneg	23	0	0	1	2.1374	1.2442	1	1.92959	1.06402	1.09586	0.315213	0.948293	0.0895265	68784.6	116818	0	155928	97141	143639	106607	72221.5	52097.8	52254.2	55207.9	57383.9	93152.7	139505	85426.8	43037.3	54656.5	77705.7
346.16	13.4364	C12H22N6O6	1	Asp-Gly-Arg	7	153972	pos	15	Peptide(tri-)	Basic peptide	1	0.417827	0.524598	NA	NA	NA	-1.25902	-0.930715	NA	NA	92617.8	58997.9	153972	81129.8	23457.4	23095.7	30508	74919.1	54883.8	0	0	0	0	0	0	0	0	0
228.173	3.5572	C13H24O3	5	[FA oxo(13:0)] 2-oxo-tridecanoic acid	7	150473	neg	23	Lipids: Fatty Acyls	Fatty Acids and Conjugates	1	0.813508	0.821355	1	1.33671	0.962577	-0.297772	-0.283923	0.418689	-0.0550268	150473	59772.6	144738	128432	77293.5	83056.7	80015.8	105737	105815	44455.4	40076.8	51578.1	51531.9	65159	65249.4	0	81353.5	49663.1
216.148	11.3748	C10H20N2O3	1	Val-Val	7	149335	pos	14	Peptide(di-)	Hydrophobic peptide	1	1.9853	0	1	4.76421	0	0.989355	NA	2.25224	NA	90658.4	37525.4	0	149335	68684.2	36463.4	0	0	0	0	2997.88	0	2950.58	3193.06	8138.88	0	0	0
172.074	4.38174	C8H12O4	4	[FA dioxo(8:0)] 4,7-dioxo-octanoic acid	7	149250	neg	24	Lipids: Fatty Acyls	Fatty Acids and Conjugates	1	0.896338	0.600442	1	0.942232	0.798703	-0.157885	-0.735904	-0.0858456	-0.324268	134382	129318	149250	141985	105045	123112	83707.2	58143	106102	137792	76136.3	116192	98084.9	111370	101595	68397.7	85026.7	110244
244.204	3.43705	C14H28O3	11	2S-Hydroxytetradecanoic acid	7	148904	neg	21	Lipids: Fatty Acyls	Fatty Acids and Conjugates	1	1.00892	0.605222	1	1.26597	0.24248	0.0128093	-0.724463	0.340243	-2.04407	146130	67245.7	121550	148904	84163.2	104845	56606.1	84880.4	61218.1	63118.4	0	38821.8	43139.2	51195.2	34718.8	0	24718.4	0
174.137	10.6216	C8H18N2O2	1	Ne,Ne dimethyllysine	7	148298	pos	24	0	0	1	0.91121	0.894273	1	1.14079	0.96112	-0.134144	-0.161213	0.190029	-0.057211	148298	72271.9	79346.2	71541.2	125488	76258.1	77614.3	102760	87832.8	105495	115715	66150.5	90960.8	128728	108129	92602.8	96872.1	86713.7
149.084	4.16545	C9H11NO	1	D-Cathinone	7	143267	pos	24	0	ephedrine biosynthesis	1	1.2196	0.642961	1	0.972795	1.04801	0.286409	-0.637196	-0.039792	0.0676524	126867	62488.2	119374	143267	120713	112546	70824	68649.4	59027.6	95939.2	66536.5	63562.7	61780.8	79877.8	78230.5	81333.5	71392.5	84164.5
181.038	11.4719	C8H7NO4	3	DIBOA	7	142639	posneg	23	Biosynthesis of Secondary Metabolites	Benzoxazinone biosynthesis	1	1.13816	0.487727	1	1.3994	0.901207	0.1867	-1.03585	0.484813	-0.150069	37554.8	67954.3	118031	65344.1	46440.5	142639	69329.8	0	39696.8	43419.9	46995.5	58154.7	56112.9	77761.9	74034.9	34131	52364.7	47396.7
315.241	3.57018	C17H33NO4	1	[FA (10:0)] O-decanoyl-R-carnitine	7	137960	pos	23	Lipids: Fatty Acyls	Fatty acyl carnitines	1	1.7559	1.469	1	1.06069	0.823551	0.812208	0.554832	0.0849994	-0.280069	85527.3	63329.8	0	72900.7	73358.6	115119	69755.2	62850.1	86065.4	112681	96077.1	102686	85607.3	106777	137960	88615.6	98065.7	69809
340.298	3.1801	C21H40O3	4	[FA oxo(21:0)] 2-oxo-heneicosanoic acid	7	121234	pos	22	Lipids: Fatty Acyls	Fatty Acids and Conjugates	1	1.68663	0.931567	1	0.998809	1.28189	0.754147	-0.102268	-0.00171859	0.358269	62156	0	71087.7	82599.8	73833.3	68300.2	59350.1	0	64775.4	56597.2	103326	85202.6	55421.7	88684.9	100728	83929.7	109060	121234
486.206	16.567	C18H34N2O13	1	Glucosylgalactosylhydroxylysine	7	119466	neg	15	0	0	1	0.627075	0.726106	NA	NA	NA	-0.67329	-0.461748	NA	NA	119466	97465.6	118271	77003	65284.9	67909	60812	91113.3	91467.1	0	0	0	0	0	0	0	0	0
114.079	9.82719	C5H10N2O	2	3-Amino-2-piperidone	7	109209	pos	23	0	0	1	0.445751	1.13682	1	0.78405	0.705236	-1.16569	0.185006	-0.350983	-0.503821	103158	60716.1	79366.6	0	53324.3	55100.5	109209	109017	58294.5	58187.1	61816.7	45825.1	42301.2	44378.2	43338.6	40003.5	44588.8	32356.3
173.999	5.05116	C6H6O4S	2	Phenol sulfate	7	108806	neg	24	0	0	1	1.13324	0.93268	1	0.981842	1.12947	0.180449	-0.100545	-0.0264377	0.175643	82170.6	91864.1	96243.5	107219	95036.8	104034	76856.8	108806	66419.9	52357.5	51397.9	54397.2	43233.4	47007	65040.3	53742.4	54806.8	70078.9
101.048	23.9417	C4H7NO2	5	L-Azetidine 2-carboxylic acid	7	105537	neg	24	0	0	1	1.10067	1.13934	1	1.1971	0.974864	0.138377	0.188193	0.259548	-0.036727	76434.4	69543.5	81755.1	80515.3	89499.6	80643.3	80237.7	87294.1	91932.7	77364.9	72915.1	74371.2	105537	86229.9	77163.6	71544.8	74059.5	73400
268.08	12.6157	C9H16O9	4	2-keto-3-deoxy-D-glycero-D-galacto-nononate	7	100314	neg	18	0	0	1	2.78192	0	1	1.3128	0.98139	1.47608	NA	0.392647	-0.0271021	29976	0	0	26346.1	21751.4	35293.4	0	0	0	72797	46733.9	59386.7	53647.8	80920.9	100314	58970.3	46723	69894.6
160.074	4.54781	C7H12O4	5	Dihydro-3-hydroxy-3-(1-hydroxyethyl)-4-methylfuran-2(3H)-one	7	100310	neg	24	Lipids: Fatty Acyls	Fatty esters	1	1.02616	0.960488	1	0.639712	0.865922	0.0372527	-0.058161	-0.644505	-0.207691	98480.4	59154.5	68532.8	75029	100310	56745.2	66660.1	70254.3	80317	95842.3	54748.1	40880.2	25774.3	60285.3	36426.5	54973	57224.1	53601.5
185.105	8.36359	C9H15NO3	5	Ecgonine	7	96818	pos	24	Biosynthesis of Secondary Metabolites	Alkaloid biosynthesis II	1	0.920136	1.13345	1	1.18566	1.54232	-0.120081	0.180725	0.245688	0.6251	96818.4	30904.9	58849.5	54690.7	86219.1	30762.4	67266.4	59720.1	84485.1	45338.8	18118.3	20258.5	18330.5	44202.3	36725.2	48393.7	41924.8	38797.4
313.189	4.14984	C16H27NO5	1	Heliotrine	7	91830	neg	20	0	0	1	1.28151	1.02991	1	1.68558	0	0.357844	0.0425139	0.753247	NA	47363.8	54721.4	50611.6	58831.4	45020.9	91830.1	48512.1	59047.7	49703.8	15777.3	0	15116.1	13455.8	19683.7	18933.7	0	0	0
143.058	7.38438	C6H9NO3	1	Vinylacetylglycine	7	88007	neg	24	0	0	1	1.05659	0.873454	1	1.06085	0.942551	0.0794118	-0.195197	0.085222	-0.0853568	63738.2	68026.8	75080	72333.8	58209.4	88006.7	59317	63834.7	57517.8	36855.7	36669.5	35638.7	35970.4	36179.6	43656.7	27753.1	42203.3	32936.3
174.137	14.0548	C8H18N2O2	1	Ne,Ne dimethyllysine	7	84615	pos	24	0	0	1	0.87102	0.840627	1	1.13112	0.725881	-0.199222	-0.250462	0.177747	-0.462195	84614.7	35090.4	63692.1	52792.3	58550.4	48399.9	46305.5	48896	58967.2	35482.7	51490.4	31430.3	40757.5	58652	34518.5	21212.3	39620.7	25113.7
118.053	7.15674	C7H6N2	1	Benzimidazole	7	81347	pos	24	0	0	1	1.07168	0.616228	1	0.675032	0.650832	0.099878	-0.698465	-0.566973	-0.619643	30265.6	52132.1	63924	45639.5	47568.5	63602.5	81347	4072.14	4748.39	70744.7	29768.2	58388.9	22488.4	42067	42708.4	39786.6	18914.5	44717.3
176.141	4.35264	C9H20O3	2	1-Hexylglycerol	7	76101	neg	24	Lipids: Glycerolipids	Monoradylglycerols	1	1.33708	0.823623	1	0.93871	0.986632	0.41909	-0.279944	-0.0912491	-0.0194166	68224.7	24615.8	46528.5	42383.9	67863.3	76100.8	25416.8	42761.5	46609.1	39435.9	42928.7	18958	13157.9	48188	33766.6	30863.9	33155	35949.2
162.976	8.26306	C4H5NO2S2	2	2-Thiophenesulfonamide	7	68799	neg	17	0	0	1	0.719853	1.22181	NA	NA	NA	-0.474226	0.289015	NA	NA	68798.7	23099.8	18618.8	26104.9	42268.7	11182.5	41097.4	38593.6	55339.6	0	0	0	0	3374.9	0	0	3317.5	0
159.053	8.30871	C6H9NO4	3	beta-Alanopine	7	65604	pos	24	0	0	1	0.885514	0.925286	1	0.399247	1.25506	-0.175413	-0.112029	-1.32465	0.327757	61511.1	38270.2	36423.8	35478.2	65604.3	19529	38315.1	41530.5	46183	51648.5	27629.9	25152.1	4295.55	32091.2	5306.88	52614.7	34851	43601
203.058	4.56524	C11H9NO3	2	Anibine	7	65433	pos	19	0	0	1	0.170203	1.05855	1	7.93281	0.787063	-2.55467	0.0820872	2.98783	-0.345449	55216.4	0	0	0	9397.98	0	17294.4	13815	27339.8	6009.14	3189.87	4645.38	35292.6	9098.84	65433.5	3822.02	7074.39	0
189.079	10.0441	C11H11NO2	6	3-Indolepropionicacid	7	63879	neg	16	0	0	1	3.33252	0.768402	1	14.7967	0	1.73661	-0.380067	3.88721	NA	17468.7	0	20806.5	63878.7	26204.4	37470	9656.88	19753.9	0	0	0	2799.08	18689.6	10779.8	11947.9	0	0	0
188.127	20.5482	C7H16N4O2	5	Ngamma-Monomethyl-L-arginine	7	63774	pos	24	0	0	1	0.981606	0.727023	1	1.0321	1.06836	-0.0267837	-0.459928	0.045588	0.0953968	39795.8	62729.5	53488.1	48613.6	40756.2	63774	28619.2	49950.4	34855.7	25811.7	18428.7	17926.7	17710.7	19051.5	27400.8	22100.7	20201	24115.2
147.089	7.31035	C6H13NO3	2	N-hydroxyisoleucine	7	62748	posneg	24	0	lotaustralin biosynthesis __ superpathway of linamarin and lotaustralin biosynthesis	1	0.892457	1.13435	1	0.825384	1.2028	-0.164145	0.181869	-0.276862	0.266393	27415.7	36859.5	25935.5	21349.4	35913.3	23246.4	26232.9	29545.6	46552.2	35118.1	37394.2	40504.9	42856.2	27731	22695.4	62747.6	32862	40327.2
137.999	10.9158	C3H6O4S	2	2-oxopropane sulfonate	7	61833	neg	24	0	0	1	1.71274	1.39655	1	1.07683	0.922107	0.776309	0.481872	0.106793	-0.116994	45288.1	34720	21153.9	56312.9	61833.4	55118.3	43795	51357.9	46125.4	24123.3	28059.6	23383.9	30379.6	25716.7	25276.3	21530.6	24380.8	23769.2
249.031	14.3602	C8H11NO6S	1	Norepinephrinesulfate	7	58759	pos	21	0	0	1	1.04786	0.58137	1	1.22037	0	0.0674411	-0.782472	0.287315	NA	34659.7	42465.2	47169	58759.3	33328	38154.9	21049.8	29743.4	21467.6	5385.86	1965.75	3962.4	4196.85	4265.09	5345.3	0	0	0
205.114	8.67453	C9H19NO2S	1	tetrahomomethionine	7	56217	neg	22	0	0	1	0.505435	0.638075	1	0.140427	1.47083	-0.984402	-0.648202	-2.8321	0.556634	48795.1	37686.7	56217.3	32842.5	27618.3	11664.4	23784.6	33828.3	33439.8	9789.66	6304.24	3810.59	0	2795.13	0	8984.97	9169.11	11122.1
147.068	6.96662	C9H9NO	3	3-Methyloxindole	7	49204	pos	24	0	0	1	1.15753	0.834079	1	1.11109	1.02373	0.211044	-0.261744	0.151976	0.0338378	33116.5	37393.8	29565.2	35757.6	30878.4	49203.9	27897.4	29646.3	25927.2	38638.3	27289.7	29366.5	25455.2	38535.2	41890.5	30499.8	29961.2	37095
275.148	13.7398	C11H21N3O5	6	L-a-glutamyl-L-Lysine	7	49135	neg	24	Peptide(di-)	Basic peptide	1	0.787193	0.896084	1	0.832215	0.921651	-0.34521	-0.158293	-0.264971	-0.117708	41867	41665.8	49135.3	34883.6	22363	47188.8	34951.9	43740.4	40189.5	19319.6	17573.3	14345.1	8925.27	13880.3	19835.5	17971	13085.3	16167.2
152.059	7.52061	C7H8N2O2	3	N1-Methyl-4-pyridone-5-carboxamide	7	47474	pos	24	Metabolism of Cofactors and Vitamins	Nicotinate and nicotinamide metabolism	1	1.05057	1.01504	1	0.822087	0.862709	0.0711724	0.0215295	-0.282637	-0.213054	21018.6	30571.4	35248.9	38070.3	25433	27727.1	23917.9	28425	35801.7	19238.9	18447.3	15931.1	12571.9	14760.4	16745.8	16455.5	13892.9	15907.7
554.491	2.87434	C34H66O5	5	DG(15:0/16:0/0:0)	7	47252	neg	20	Lipids: Glycerolipids	Diradylglycerols	1	0.785196	0.702102	1	0.418078	1.88853	-0.348875	-0.510247	-1.25816	0.917261	47251.5	27373.2	25009.5	40366.2	37866.2	0	25413.1	25305.2	19235.2	10688.7	9856.91	0	0	8589.65	0	16392.5	6482.27	15926
196.121	8.09044	C10H16N2O2	2	Fasoracetam	7	46489	pos	24	0	0	1	0.97039	0.879502	1	1.02696	1.29281	-0.0433636	-0.185242	0.0383833	0.370511	46488.9	38604.6	44628.1	44491.7	35275.2	46113.6	35462.1	41482.7	37145.6	13365.8	10694	14540.8	11684.6	13196.4	14760.4	19171.5	17509.9	13221.9
202.121	9.04111	C10H18O4	3	[FA (10:0/2:0)] Decanedioic acid	7	44051	neg	22	Lipids: Fatty Acyls	Fatty Acids and Conjugates	1	0.657093	0.640581	1	0.512444	1.07948	-0.605831	-0.642547	-0.964534	0.110331	39355.4	24673.3	33549.9	44051.2	15708.6	4358.39	12928.3	21397.3	28181.4	28303.5	23603	23062.4	8426.54	21134.4	8856.42	31810.5	7772.71	41344
308.159	15.9143	C12H24N2O7	2	Fructoselysine	7	40824	neg	24	0	fructoselysine and psicoselysine degradation	1	1.09354	0.688464	1	1.64009	0.871697	0.129009	-0.538547	0.713775	-0.198102	29620	27723.3	33188.6	40824	27028.5	31147.9	23584.8	26551.4	12191.7	10510.9	12146.9	10087.7	16969.3	24892.9	11843.4	8503.9	10478.6	9561.67
268.081	8.3485	C10H12N4O5	3	Allopurinolriboside	7	39928	neg	15	0	0	1	2.72233	1.24117	NA	NA	NA	1.44484	0.311704	NA	NA	16890.9	11321.7	11265.4	39927.5	37629	29915.4	15803.7	15155.5	18039.8	0	0	0	0	0	0	0	0	0
169.041	8.11283	C19H15N2O2Cl	1	Inabenfide	7	38097	pos	24	0	0	1	0.767415	0.850943	1	0.947769	1.12796	-0.381921	-0.232865	-0.0773927	0.173718	32825.4	16743.4	30508.8	17897.7	23805.3	19749.7	25835.4	21234.2	21071.9	25231.3	19255.5	16475.4	15272.2	25365.1	17140.7	29527.6	21227.4	18008
216.063	10.9533	C9H12O6	1	cis-(homo)3aconitate	7	33319	neg	24	Metabolism of Cofactors and Vitamins	coenzyme B biosynthesis	1	1.1775	1.17641	1	0.997152	1.02515	0.235731	0.234388	-0.00411522	0.0358329	23171.6	23829.2	22574.8	23732.3	29719	28474.3	23310	33318.7	25220.5	21545.8	27696.2	21265.9	21233.7	25775	23298.4	24629.9	21783.3	25867.9
150.079	7.27744	C8H10N2O	1	p-nitroso-N,N-dimethylaniline	7	31776	pos	24	0	0	1	1.09426	0.813986	1	1.10845	1.04558	0.129956	-0.296923	0.14854	0.0643067	26483.1	25223.8	26879.8	31776.3	29134.6	25083.4	20370.3	21714.3	21883.9	17307.1	13632.4	12946.4	16682.6	19039.7	12922.9	13494.1	14490.8	17901.4
96.0576	4.01542	C6H8O	3	Cyclohex-2-enone	7	30332	neg	19	0	0	1	0.898733	0.365967	1	3.90891	0.949914	-0.154035	-1.45022	1.96677	-0.0741319	30331.6	17560.8	15800	16966.3	14856.7	25419.6	8647.02	14662.3	0	0	0	12113.7	14665.2	10562.6	22123.7	0	11507	0
139.063	7.6178	C7H9NO2	3	3,4-dihydroxybenzylamine	7	29629	neg	24	0	0	1	1.06226	0.863376	1	0.975804	0.784364	0.0871307	-0.211939	-0.0353365	-0.350405	18787.1	21810.1	25785.6	23675.5	17211	29629.1	13316.5	22734.1	21262.8	12219.5	15406.7	13287.6	14344.9	12041.8	13537	8588.47	11416	12086.8
174.089	10.4853	C8H14O4	3	Suberic acid	7	29536	neg	24	Lipids: Fatty Acyls	Fatty Acids and Conjugates	1	0.75153	1.07603	1	0.553275	0.703203	-0.412098	0.105721	-0.853933	-0.507986	23446	20119.1	15488.5	15375.8	18544.9	10459.8	17164.1	16843.9	29535.5	16761.2	15038.9	18642.4	9525.73	9263.18	9119.64	12659.7	8995.86	13815.8
180.079	4.16967	C10H12O3	7	Coniferyl alcohol	7	28294	neg	21	Biosynthesis of Secondary Metabolites	Phenylpropanoid biosynthesis	1	0.920718	0.611312	1	0.56665	0.411343	-0.119168	-0.710018	-0.81947	-1.28159	22194.5	13006.7	24725.7	22789.9	17187.7	15198.2	12171.2	12456.3	12006.6	9692.47	28293.9	9649.9	7946.75	10092.3	8954.04	0	9631.29	9963.56
208.061	8.86425	C6H13N2O4P	1	N-acetyl-demethylphophinothricin	7	26538	pos	19	0	0	1	0.830627	0.674477	1	0.853662	0.815112	-0.267727	-0.56816	-0.228263	-0.294931	5652.3	13363.7	11458.6	6689.85	10003.2	8619.98	10073	10481.5	0	15896.9	9804.77	20826.3	13827.6	9994.01	15897.5	11387.1	26538.3	0
200.029	4.8515	C12H8OS	1	dibenzothiophene-5-oxide	7	24836	pos	24	0	dibenzothiophene desulfurization	1	0.777793	0.823653	1	0.912963	1.31961	-0.362541	-0.279892	-0.131372	0.40011	17869.1	16983.4	21414	15654	9412.4	18697.2	14961.2	16650.4	14732.5	20706.4	11229.5	12994.6	8717.66	18692.4	13609.9	17687.4	16766.9	24836.4
214.084	10.4453	C20H28O10	1	Furcatin	7	24751	neg	24	0	0	1	0.916528	0.717569	1	0.890457	1.07421	-0.125748	-0.47881	-0.167382	0.103272	21709	21015.7	24751.2	22748.4	15334.7	23760.5	13580.6	17743.7	17094.5	8788.95	6565.16	7808.62	6424.86	7146.61	7053.94	6183.89	10223.4	8474.29
155.991	8.25545	C3H8O3S2	1	2-(Methylthio)ethanesulfonate	7	20308	pos	24	Metabolism of Cofactors and Vitamins	Folate biosynthesis	1	0.637671	1.516	1	1.12803	1.23211	-0.649116	0.600273	0.173799	0.30113	6439.55	10542.5	18867.4	5459.87	5144.32	12256	15715.9	18323.7	20308.3	5134.03	4894.33	8981.89	6431.47	7497.8	7514.77	7869.34	7742.16	7811.19
306.104	6.93053	C15H18N2O3S	1	indole-3-acetyl-methionine	7	19779	pos	21	0	0	1	1.84069	1.0778	1	0.322801	0.831931	0.880248	0.108087	-1.63128	-0.265465	9496.97	5941.11	3727.62	13769	5626.56	15882.5	5536.6	9758.09	5362.07	4997.85	0	2130.21	0	1478.27	822.674	0	1154.44	4775.61
232.117	19.0497	C8H16N4O4	1	(3R)-hydroxy-N-acetyl-(L)-arginine	7	16877	pos	23	0	0	1	0.968616	0.50875	1	0.930982	0.812798	-0.0460027	-0.97497	-0.103175	-0.299031	5254.24	9697.12	11568.6	4642.21	4168.62	16876.9	3240.57	7719.45	2532.04	4586.19	3547.97	3101.72	2842.6	2777.16	4840.64	2232.84	2910.98	3988.69
252.105	19.2682	C21H28N8O7	1	Asp-Pro-His-His	7	11837	neg	24	Peptide(tetra-)	Basic peptide	1	0.995038	0.862454	1	1.11595	0.695545	-0.00717711	-0.21348	0.158267	-0.523784	9223.4	10360	9780.12	11836.9	5850.36	11530.5	7517.65	9493.22	8313.84	3676.96	4397.13	4210.07	2964.81	5119.48	5624.17	1748.73	1874.28	4921.18
173.117	18.6546	C7H15N3O2	2	L-Indospicine	7	6962	pos	21	0	0	1	0.859744	0.797453	1	1.23951	0.88275	-0.218021	-0.326529	0.309773	-0.179923	6175.57	6066.15	6961.64	5354.83	4227.37	6927.78	4921.58	5958.39	4433.8	2589.64	2772.79	2326.49	2834.71	2415.62	4280.19	1999.34	2343.75	2444.3
240.111	13.4668	C22H32N4O8	10	Ala-Leu-Asp-Tyr	7	6278	pos	16	Peptide(tetra-)	Hydrophobic peptide	1	0.69908	0.754933	NA	NA	NA	-0.51647	-0.405579	NA	NA	5764.74	5553.9	6277.82	3961.17	3677.64	4662.53	3894.31	5508.9	3880.94	0	0	0	921.106	0	0	0	0	0
129.043	9.48108	C5H7NO3	6	L-1-Pyrroline-3-hydroxy-5-carboxylate	6	172704160	negpos	24	Amino Acid Metabolism	Arginine and proline metabolism	1	0.875173	0.875021	1	0.912449	0.956318	-0.192359	-0.192611	-0.132184	-0.0644375	150071984	154903136	151050336	123195184	103201960	172704160	127958024	134995888	136077840	82290000	81751488	79921832	56880860	69464760	96258528	76330272	75794848	81181424
216.04	12.2905	C5H13O7P	1	2-C-Methyl-D-erythritol 4-phosphate	6	140156736	neg	24	Lipid Metabolism	Biosynthesis of steroids	1	0.976669	0.823093	1	1.0639	0.932416	-0.0340587	-0.280873	0.089365	-0.100954	114180296	118745024	111405112	105107896	91032160	140156736	94797632	102398880	86219440	74584280	74306960	68834832	61791692	84075088	85772376	64878152	65859272	72273952
239.102	9.58119	C9H13N5O3	4	Dihydrobiopterin	6	94614992	pos	24	Metabolism of Cofactors and Vitamins	Folate biosynthesis	1	0.966805	0.939049	1	1.03182	0.965495	-0.0487034	-0.0907274	0.0451982	-0.0506596	75534440	79547304	78233344	74539032	70117904	80913224	72007472	77428080	69658784	69649272	69782664	70433296	63064236	74903120	78576816	70627928	64262812	67733048
284.271	3.16489	C18H36O2	25	Octadecanoic acid	6	87842352	neg	24	Lipid Metabolism	Fatty acid biosynthesis__Biosynthesis of unsaturated fatty acids	1	0.757973	0.922261	1	0.815921	0.957247	-0.399782	-0.116754	-0.293499	-0.0630368	79398592	87842352	67229128	71768288	53673676	52280004	63075796	76589904	76576808	47225536	55788788	32415676	33730244	37226812	39543072	43818332	36452932	49368704
203.058	7.13795	C11H9NO3	2	Indolepyruvate	6	66297376	negpos	24	Amino Acid Metabolism	Tryptophan metabolism	1	1.2686	0.821381	1	1.64507	1.20369	0.343232	-0.283876	0.71815	0.267461	44922604	46316368	43697852	62726728	42156132	66297376	38830212	42896116	29108228	18331422	16618499	21024526	27331024	30244244	34506692	22140780	24273170	20961788
131.07	12.2721	C4H9N3O2	2	Creatine	6	52998772	posneg	24	Amino Acid Metabolism	Glycine, serine and threonine metabolism__Arginine and proline metabolism	1	0.975776	0.744838	1	1.15002	0.952233	-0.0353782	-0.425002	0.201664	-0.0706137	42117480	40237368	49749760	43463252	32442472	52998772	29741910	39773460	28881150	14835456	14131745	13770368	12411524	17056410	19681294	13069621	12769345	14857150
177.064	11.1468	C6H11NO5	1	4-Hydroxy-4-methylglutamate	6	36815820	negpos	24	Carbohydrate Metabolism	C5-Branched dibasic acid metabolism	1	0.683786	0.883193	1	1.21123	0.884322	-0.548383	-0.179199	0.276469	-0.177356	29787492	25357004	36815820	27318146	18856934	16706118	21867712	31051870	28299150	686104	601614	600135	655550	785703	845364	532365	539479	597626
130.063	4.36739	C6H10O3	18	(S)-3-Methyl-2-oxopentanoic acid	6	36661796	neg	24	Amino Acid Metabolism	Valine, leucine and isoleucine degradation__Valine, leucine and isoleucine biosynthesis	1	1.04903	0.486511	1	1.23596	0.984175	0.0690553	-1.03946	0.305633	-0.0230138	30946022	28789928	27352796	36661796	20539920	34156948	14954077	15847360	11568198	9672468	8472044	9534414	10021107	10713497	13475456	8914741	8902637	9423518
131.058	12.0239	C5H9NO3	14	L-Glutamate 5-semialdehyde	6	13751987	posneg	24	Amino Acid Metabolism	Arginine and proline metabolism	1	0.822728	0.812745	1	1.15971	0.982224	-0.281512	-0.299125	0.213769	-0.0258759	11096741	10264172	13751987	13150672	8733233	7004470	8795268	10666654	9075918	281684	243409	303039	270157	314833	375406	245006	304423	263982
113.048	12.5329	C5H7NO2	6	(S)-1-Pyrroline-5-carboxylate	6	12685870	neg	24	Amino Acid Metabolism	Glutamate metabolism__Arginine and proline metabolism	1	1.13449	0.817877	1	1.16298	0.847743	0.182039	-0.290045	0.217827	-0.2383	8844175	9013044	7556139	9465332	6679897	12685870	5.95311e+06	7.46084e+06	7.37105e+06	1993773	2.07953e+06	1.86253e+06	2.14671e+06	2.4441e+06	2.31245e+06	1.62068e+06	1.64391e+06	1767478
228.209	3.33114	C14H28O2	23	Tetradecanoic acid	6	10547317	neg	24	Lipid Metabolism	Fatty acid biosynthesis	1	0.815096	0.640195	1	0.984554	0.905587	-0.294958	-0.643416	-0.0224577	-0.143075	10547317	5990710	8993111	9729368	6657521	4.42344e+06	4.7027e+06	6.20072e+06	5441498	4.08049e+06	4.25231e+06	2.82711e+06	3.15503e+06	4364518	3.46799e+06	3292931	2.74816e+06	4.06517e+06
114.032	12.6222	C5H6O3	6	2-Hydroxy-2,4-pentadienoate	6	10002732	neg	24	Amino Acid Metabolism	Phenylalanine metabolism__Benzoate degradation via hydroxylation__Biphenyl degradation__Toluene and xylene degradation__1,4-Dichlorobenzene degradation__Fluorene degradation__Carbazole degradation__Ethylbenzene degradation__Styrene degradation	1	1.01731	0.811884	1	1.00291	0.937327	0.0247589	-0.300655	0.00419074	-0.0933752	7438562	7987097	6.59842e+06	6.81141e+06	5591171	10002732	5.75901e+06	6.73939e+06	5.38259e+06	6099198	5.04405e+06	5.06391e+06	4457713	5.55386e+06	6.24274e+06	4828109	4862080	5501225
92.0474	9.70511	C3H8O3	1	Glycerol	6	8908075	neg	24	Carbohydrate Metabolism	Galactose metabolism__Glycerolipid metabolism	1	1.14878	1.36798	1	1.142	1.14363	0.200102	0.452042	0.191559	0.193617	3.92275e+06	4.6868e+06	6.34472e+06	4.55084e+06	3915731	8712593	6.71005e+06	8908075	4838952	2.26092e+06	2154860	4.09793e+06	2.5332e+06	3.36476e+06	3.82468e+06	3458128	3.66263e+06	2.61576e+06
116.047	7.18455	C5H8O3	9	3-Methyl-2-oxobutanoic acid	6	6690144	negpos	24	Amino Acid Metabolism	Valine, leucine and isoleucine degradation__Valine, leucine and isoleucine biosynthesis__Pantothenate and CoA biosynthesis	1	0.976247	0.485783	1	0.911976	0.820805	-0.0346824	-1.04162	-0.132932	-0.284888	4852468	6.26423e+06	5052765	6690144	4.16541e+06	4.92984e+06	2.20847e+06	3.64526e+06	2.00112e+06	1.77138e+06	1.44422e+06	1963355	1.13537e+06	1.64743e+06	1.94028e+06	1.23266e+06	1.74063e+06	1.27763e+06
331.555	11.2752	C21H27N7O14P2	1	NAD+	6	6034098	posneg	15	Energy Metabolism	Oxidative phosphorylation__Glutamate metabolism__Nicotinate and nicotinamide metabolism	1	0.635812	0.694341	NA	NA	NA	-0.653328	-0.526283	NA	NA	4815854	2.12775e+06	6034098	4.7842e+06	1.41237e+06	2.05481e+06	2268211	3.78499e+06	2.95775e+06	0	0	0	0	0	0	0	0	0
506.996	12.699	C10H16N5O13P3	4	ATP	6	5222017	posneg	21	Energy Metabolism	Oxidative phosphorylation__Photosynthesis__Purine metabolism__Puromycin biosynthesis__Zeatin biosynthesis	1	0.620899	0.625709	1	1.69031	3.93411	-0.68757	-0.676437	0.757287	1.97604	3.04216e+06	2282807	5222017	3.83822e+06	1.41753e+06	1292857	1.487e+06	2759364	2352977	0	2899.22	0	1714.94	3185.63	0	5123.6	2398.85	3883.38
84.0211	9.70257	C4H4O2	2	3-Butynoate	6	4604681	pos	20	Carbohydrate Metabolism	Butanoate metabolism	1	1.27172	0.964774	1	1.23894	0	0.346784	-0.0517363	0.309103	NA	2224156	1.87566e+06	2.99821e+06	4.60468e+06	2.78538e+06	1.63665e+06	1.8848e+06	2464545	2.49864e+06	42935.7	6131.67	22250.3	34169	0	54189.2	0	0	0
136.037	11.0117	C4H8O5	3	[FA trihydroxy(4:0)] 2,3,4-trihydroxy-butanoic acid	6	4493190	neg	24	Carbohydrate Metabolism	Ascorbate and aldarate metabolism	1	0.98473	0.756388	1	1.03407	0.922692	-0.0221998	-0.402801	0.0483288	-0.116079	3.36641e+06	3.79998e+06	3.85626e+06	3.75554e+06	2.60561e+06	4.49319e+06	2.47798e+06	3.21193e+06	2.64749e+06	1.27657e+06	1146326	1.11826e+06	907701	1.20956e+06	1.54453e+06	1.05472e+06	1.05822e+06	1.15445e+06
129.043	12.1777	C5H7NO3	6	1-Pyrroline-4-hydroxy-2-carboxylate	6	4202132	neg	24	Amino Acid Metabolism	Arginine and proline metabolism	1	1.02526	0.804797	1	1.14639	0.989042	0.0359894	-0.313304	0.197102	-0.0158959	3.08259e+06	3.21123e+06	3633969	3.77869e+06	2.19774e+06	4.20213e+06	2.36889e+06	3.16129e+06	2.45967e+06	1.28643e+06	1.28283e+06	1189124	1.1379e+06	1.44057e+06	1.73012e+06	1.28467e+06	1.14625e+06	1.28628e+06
97.9674	14.0971	H2O4S	1	Sulfate	6	4083084	neg	24	Nucleotide Metabolism	Purine metabolism__Cysteine metabolism__Sulfur metabolism	1	0.942467	0.708638	1	1.01122	0.865377	-0.0854856	-0.496879	0.0160967	-0.2086	3.44589e+06	3491188	3.72903e+06	3.18744e+06	2.78194e+06	4.08308e+06	2465227	2.77271e+06	2320484	2258144	1.85894e+06	1.84065e+06	1.3513e+06	2.08259e+06	2.5907e+06	1.87577e+06	1.69559e+06	1584329
169.998	12.3021	C3H7O6P	7	D-Glyceraldehyde 3-phosphate	6	3737433	neg	15	Carbohydrate Metabolism	Glycolysis / Gluconeogenesis__Pentose phosphate pathway__Inositol metabolism__Pentose and glucuronate interconversions__Fructose and mannose metabolism__Galactose metabolism__Biosynthesis of steroids__Clavulanic acid biosynthesis__Methane metabolism	1	0.902966	0.681032	NA	NA	NA	-0.147256	-0.554205	NA	NA	2.93144e+06	2.20301e+06	3.08236e+06	3737433	2.11075e+06	1.57131e+06	1.25834e+06	1.89603e+06	2.44153e+06	0	0	0	0	0	0	0	0	0
177.046	7.15352	C6H11NO3S	3	N-Formyl-L-methionine	6	3191676	negpos	24	Amino Acid Metabolism	Methionine metabolism	1	0.856902	0.785877	1	0.465173	1.17077	-0.222799	-0.347625	-1.10416	0.227463	2.11823e+06	2.03732e+06	3.19168e+06	2.81261e+06	2156290	1.32695e+06	1663911	2.04443e+06	2.06568e+06	978964	736666	599496	31939.9	1.0331e+06	11889.9	828027	799557	1.08291e+06
154.003	10.4342	C3H7O5P	3	Propanoyl phosphate	6	3012906	negpos	24	Carbohydrate Metabolism	Propanoate metabolism__C5-Branched dibasic acid metabolism	1	0.722051	0.889288	1	1.00279	1.06309	-0.469828	-0.169277	0.00401903	0.0882594	2.14117e+06	1.93342e+06	3012906	2.22627e+06	1.47612e+06	1.41514e+06	1742088	2.38988e+06	2.17086e+06	41398.5	39412.8	36110.2	31302.9	37642.4	48302.3	41131.7	43023.4	40142.6
187.085	7.15759	C8H13NO4	6	6-Acetamido-2-oxohexanoate	6	3000687	pos	24	Amino Acid Metabolism	Lysine degradation	1	0.664681	0.951555	1	1.18597	1.53983	-0.589265	-0.0716414	0.246067	0.622767	1.87844e+06	2.62654e+06	3.00069e+06	1.82392e+06	1.83435e+06	1.33061e+06	2.004e+06	2.61477e+06	2.52329e+06	456448	647788	913590	683431	724230	985421	1.13833e+06	1.24271e+06	726068
169.05	11.377	C4H12NO4P	1	Phosphodimethylethanolamine	6	2972070	posneg	17	Lipid Metabolism	Glycerophospholipid metabolism	1	0.565151	0.659331	NA	NA	NA	-0.823291	-0.600926	NA	NA	2.76428e+06	2.36253e+06	2972070	1807911	1.16134e+06	1.60784e+06	1.28387e+06	2.09639e+06	1.95958e+06	0	0	0	3104.52	2950.82	0	0	0	0
147.053	9.76341	C5H9NO4	14	L-4-Hydroxyglutamate semialdehyde	6	2581697	neg	24	Amino Acid Metabolism	Arginine and proline metabolism	1	0.944062	0.673545	1	1.41479	1.02167	-0.0830467	-0.570154	0.500588	0.03093	2.38132e+06	1.68122e+06	2.07152e+06	2.5817e+06	1.77404e+06	1.4352e+06	1.0117e+06	1445112	1.67475e+06	77473.2	69990.3	82678.7	79653.1	104679	141271	87880.5	72951.5	74297.6
427.03	11.9319	C10H15N5O10P2	6	ADP	6	2316887	posneg	16	Energy Metabolism	Oxidative phosphorylation__Photosynthesis__Purine metabolism__Zeatin biosynthesis	1	0.714565	0.83154	NA	NA	NA	-0.484864	-0.266143	NA	NA	2302973	1582155	2.31689e+06	2.10028e+06	1.09361e+06	1.23785e+06	1.28112e+06	2166354	1.70975e+06	0	0	0	0	0	0	0	2407.56	0
312.303	3.08434	C20H40O2	22	[FA (20:0)] eicosanoic acid	6	2192400	neg	24	Lipids: Fatty Acyls	Fatty Acids and Conjugates	1	0.832589	0.925904	1	0.710577	0.994566	-0.264324	-0.111065	-0.492936	-0.00786143	1.58636e+06	2192400	1.63494e+06	1.9926e+06	1.31335e+06	1.20142e+06	1343866	1.85897e+06	1.80973e+06	535473	685158	326679	359897	338039	401547	544707	449787	544408
129.079	7.15026	C6H11NO2	9	N4-Acetylaminobutanal	6	2104779	pos	24	Amino Acid Metabolism	Arginine and proline metabolism	1	0.887013	0.848255	1	0.826959	0.958105	-0.172973	-0.237431	-0.274113	-0.0617438	1.74642e+06	1.40849e+06	2104779	1.67781e+06	1.33686e+06	1.65075e+06	1.46896e+06	1.55481e+06	1.43779e+06	71227	84875.5	63068	73416.4	68931.1	38897.4	81529.6	79746.4	48712.4
145.074	12.9419	C6H11NO3	9	[FA oxo,amino(6:0)] 3-oxo-5S-amino-hexanoic acid	6	2020845	posneg	24	Amino Acid Metabolism	Lysine degradation	1	0.995125	0.838438	1	1.12477	0.891658	-0.00704981	-0.254224	0.169628	-0.165438	1.6425e+06	1.82642e+06	1.93408e+06	2.00218e+06	1.35363e+06	2.02085e+06	1.38064e+06	1.73557e+06	1.41386e+06	745337	698923	674079	667201	794304	921136	591224	697914	599695
226.106	12.5749	C9H14N4O3	3	Carnosine	6	1945015	posneg	24	Amino Acid Metabolism	Alanine and aspartate metabolism__Histidine metabolism__beta-Alanine metabolism	1	1.09263	0.955558	1	1.13546	0.982391	0.127806	-0.0655853	0.183271	-0.0256308	1.01574e+06	1.55838e+06	1.06224e+06	961333	1.06685e+06	1.94502e+06	1.31444e+06	1.0979e+06	1.0624e+06	234735	182698	178644	167879	236230	272710	170971	177010	237599
150.053	12.6347	C5H10O5	37	D-Xylulose	6	1941247	neg	24	Carbohydrate Metabolism	Pentose and glucuronate interconversions	1	0.98463	0.815628	1	1.05736	0.918301	-0.0223463	-0.294016	0.0804712	-0.122961	1442975	1.52341e+06	1.24866e+06	1.23855e+06	970460	1.94125e+06	1.15562e+06	1.21118e+06	1.07111e+06	1.25198e+06	1.17784e+06	1.03194e+06	1.01505e+06	1.2243e+06	1.42099e+06	1.0211e+06	993789	1.16406e+06
254.225	3.28316	C16H30O2	50	(9Z)-Hexadecenoic acid	6	1933087	neg	24	Lipid Metabolism	Fatty acid biosynthesis	1	1.09659	0.821976	1	0.955679	0.870827	0.133021	-0.282832	-0.0654013	-0.199542	1.50828e+06	1.4012e+06	1.75436e+06	1.93309e+06	1.54112e+06	1.64011e+06	1.0946e+06	1.50292e+06	1.23604e+06	858425	685235	585376	615339	691622	727715	559958	555832	738231
607.082	11.9801	C17H27N3O17P2	3	UDP-N-acetyl-D-glucosamine	6	1565468	neg	15	Carbohydrate Metabolism	Aminosugars metabolism__Lipopolysaccharide biosynthesis__Peptidoglycan biosynthesis	1	0.582249	0.954759	NA	NA	NA	-0.780292	-0.0667918	NA	NA	1.17318e+06	942545	1.56547e+06	950614	604543	588213	840090	1.27867e+06	1.39589e+06	0	0	0	0	0	0	0	0	0
173.08	12.1346	C6H11N3O3	1	5-Guanidino-2-oxopentanoate	6	1529623	pos	24	Amino Acid Metabolism	D-Arginine and D-ornithine metabolism	1	0.921324	0.880803	1	1.0824	0.960486	-0.118219	-0.183108	0.114239	-0.0581641	1.32869e+06	1.37205e+06	1.51837e+06	1.26515e+06	1.09239e+06	1.52962e+06	1225973	1.3868e+06	1.10344e+06	718903	728164	715726	660392	809654	870970	667052	648302	761978
121.02	12.9263	C3H7NO2S	2	L-Cysteine	6	1457914	negpos	24	Amino Acid Metabolism	Glycine, serine and threonine metabolism__Methionine metabolism__Cysteine metabolism__Penicillin and cephalosporin biosynthesis__Taurine and hypotaurine metabolism__Glutathione metabolism__Thiamine metabolism__Pantothenate and CoA biosynthesis	1	1.18331	0.855404	1	1.33532	0.731611	0.24283	-0.225322	0.417182	-0.450852	809034	823961	887278	880645	643710	1.45791e+06	689861	878689	587302	280078	389060	376066	374591	430620	590467	170229	340647	253806
245.149	12.9417	C9H19N5O3	2	beta-Alanyl-L-arginine	6	1397303	pos	21	Amino Acid Metabolism	beta-Alanine metabolism	1	1.1553	0.783766	1	1.83392	0.99174	0.208263	-0.351505	0.87493	-0.0119664	1.15841e+06	858721	884751	1.3973e+06	1.03766e+06	917577	619212	905565	749623	0	2463.09	4497.88	3119.91	5083.47	4562.46	0	6903.46	0
160.085	7.18704	C6H12N2O3	4	D-Alanyl-D-alanine	6	1322921	pos	24	Amino Acid Metabolism	D-Alanine metabolism__Peptidoglycan biosynthesis	1	0.786771	0.800384	1	1.10617	1.2611	-0.345984	-0.321235	0.145576	0.334688	1.31978e+06	1.20027e+06	1322921	1.09307e+06	943524	986952	996731	1.07157e+06	1.00755e+06	130487	61146.3	63743.1	75329.1	146295	60866.6	125522	92515.6	104019
179.058	7.14493	C9H9NO3	6	Hippurate	6	1295661	pos	24	Amino Acid Metabolism	Phenylalanine metabolism	1	0.79981	0.824456	1	1.13045	0.960118	-0.322271	-0.278486	0.176901	-0.058716	894560	1.29566e+06	1.19643e+06	945703	866847	896127	963134	978022	850986	654753	898783	814478	979478	810442	887010	681778	858918	732878
247.069	12.6908	C9H13NO7	1	N-Succinyl-L-glutamate	6	1251571	negpos	15	Amino Acid Metabolism	Arginine and proline metabolism	1	0.475223	0.405962	NA	NA	NA	-1.07332	-1.30058	NA	NA	1.25157e+06	628627	559005	681616	285854	191694	181531	292820	515872	0	0	0	0	0	0	0	0	0
178.048	12.0723	C6H10O6	26	D-Glucono-1,5-lactone	6	1173248	neg	24	Carbohydrate Metabolism	Pentose phosphate pathway	1	1.25717	0.832495	1	1.36053	0.820362	0.330177	-0.264487	0.444168	-0.285667	849112	898441	760760	1077152	902971	1.17325e+06	687672	769894	630591	192911	191888	162332	206764	314353	223270	136002	150581	162262
301.056	11.9827	C8H16NO9P	9	N-Acetyl-D-glucosamine 6-phosphate	6	1137579	neg	15	Amino Acid Metabolism	Glutamate metabolism__Aminosugars metabolism	1	0.907978	0.713259	NA	NA	NA	-0.139271	-0.487501	NA	NA	1.13758e+06	919291	979397	1.11482e+06	834919	807127	580926	748292	836428	0	0	0	0	0	0	0	0	0
117.054	13.1374	C3H7N3O2	1	Guanidinoacetate	6	1005302	pos	24	Amino Acid Metabolism	Glycine, serine and threonine metabolism__Arginine and proline metabolism	1	1.01952	0.808885	1	1.07386	1.1562	0.0278925	-0.305994	0.102801	0.209396	699221	867203	854752	872762	590377	1.0053e+06	662788	732496	563169	273472	232924	240929	208260	278912	315348	283519	246216	334327
232.106	11.2497	C9H16N2O5	5	N2-Succinyl-L-ornithine	6	993179	neg	21	Amino Acid Metabolism	Arginine and proline metabolism	1	0.369383	0.488687	1	1.10569	0.225361	-1.43681	-1.03302	0.144949	-2.14969	813335	444798	993179	472837	169499	189260	196464	466699	437023	0	6098.55	2652.71	2183.32	2029.81	5463.08	1972.2	0	0
404.002	12.7633	C9H14N2O12P2	1	UDP	6	982183	neg	15	Nucleotide Metabolism	Pyrimidine metabolism__Peptidoglycan biosynthesis__Zeatin biosynthesis	1	0.69478	0.7082	NA	NA	NA	-0.525372	-0.497772	NA	NA	982183	514734	840900	978074	312732	333462	299005	695948	660688	0	0	0	0	0	0	0	0	0
175.063	7.13994	C10H9NO2	12	Indole-3-acetate	6	972918	negpos	24	Amino Acid Metabolism	Tryptophan metabolism	1	1.39054	0.875432	1	1.40888	1.15204	0.475648	-0.191933	0.494549	0.204193	717851	487122	535240	772089	674834	972918	564428	603508	355503	165427	221847	348839	320496	359034	357564	286208	291204	270620
165.043	7.18949	C8H7NO3	8	Formylanthranilate	6	963160	posneg	24	Amino Acid Metabolism	Tryptophan metabolism	1	1.01976	0.994194	1	1.39882	1.07348	0.0282348	-0.0084007	0.484215	0.102295	570731	839262	706394	805626	757419	595170	642687	877362	584050	535741	624249	664551	941104	647950	963160	748294	594985	615330
204.111	11.6392	C8H16N2O4	5	N6-Acetyl-N6-hydroxy-L-lysine	6	912558	posneg	24	Amino Acid Metabolism	Lysine degradation	1	0.892999	0.69946	1	1.69224	1.07174	-0.163269	-0.515686	0.758938	0.0999489	912558	722869	585734	828904	660956	493635	392268	516423	644923	4255.19	4715.33	5367.02	6998.43	8479.79	8784.41	4293.79	7134.95	3937.31
75.0686	9.78174	C3H9NO	6	(R)-1-Aminopropan-2-ol	6	857632	pos	24	Amino Acid Metabolism	Glycine, serine and threonine metabolism__Porphyrin and chlorophyll metabolism	1	1.36884	0.85652	1	1.0984	0.817305	0.452955	-0.22344	0.135403	-0.291053	463002	541466	651970	843705	566062	857632	474251	536995	407527	361628	328343	330571	296008	507333	317621	299336	295782	238975
267.078	12.6455	C9H17NO6S	1	S-Ribosyl-L-homocysteine	6	820645	posneg	15	Amino Acid Metabolism	Methionine metabolism	1	1.03007	0.684292	NA	NA	NA	0.0427363	-0.547315	NA	NA	686556	573310	474774	820645	468442	497707	271668	419971	495363	0	0	0	0	0	0	0	0	0
101.084	9.74237	C5H11NO	7	Betaine aldehyde	6	811462	pos	24	Amino Acid Metabolism	Glycine, serine and threonine metabolism	1	1.21401	0.676701	1	1.252	1.08522	0.279783	-0.563409	0.324233	0.117981	382129	320379	651736	811462	630981	201626	335163	290658	290597	15421	15766.9	14684.1	16450	18877.5	22104.2	17416.9	17153.2	15210.9
255.705	4.33336	C21H36N7O16P3S	1	CoA	6	799156	neg	15	Carbohydrate Metabolism	Citrate cycle (TCA cycle)__Fatty acid metabolism__Pantothenate and CoA biosynthesis	1	0.655044	0.648574	NA	NA	NA	-0.610337	-0.624658	NA	NA	799156	706485	566924	643310	348368	365943	385937	441505	516768	0	0	0	0	0	0	0	0	0
310.287	3.10193	C20H38O2	27	[FA (20:0)] 11Z-eicosenoic acid	6	754999	neg	24	Lipids: Fatty Acyls	Biosynthesis of unsaturated fatty acids	1	1.22774	0.980409	1	1.26077	0.82703	0.296006	-0.0285442	0.334309	-0.273989	471843	358546	541404	754999	483677	445530	358807	498653	487459	93403.1	97733	71710.2	81091.8	128463	121835	60935.8	92488.3	63957.6
123.993	11.8895	C2H5O4P	1	Phosphonoacetaldehyde	6	738382	neg	15	Amino Acid Metabolism	Aminophosphonate metabolism	1	1.0839	0.689714	NA	NA	NA	0.116234	-0.53593	NA	NA	516373	432357	569012	738382	460586	446116	289387	345730	411691	0	0	0	0	0	0	0	0	0
218.127	11.5111	C9H18N2O4	5	N2-(D-1-Carboxyethyl)-L-lysine	6	720514	pos	19	Amino Acid Metabolism	Lysine degradation	1	1.09912	0.883526	1	2.90338	0	0.136348	-0.178656	1.53773	NA	412328	429822	691860	720514	484767	480780	427351	567533	360453	0	0	2912.1	3238.16	3181.38	2035.39	0	0	0
128.059	7.13482	C5H8N2O2	3	5,6-Dihydrothymine	6	697905	neg	24	Nucleotide Metabolism	Pyrimidine metabolism	1	0.849974	0.940586	1	0.906644	0.790504	-0.23451	-0.0883678	-0.141392	-0.339155	627250	643998	664261	482409	464818	697905	647706	657513	515294	443354	418117	362597	359971	365264	384559	319756	339619	308256
190.059	12.3558	C6H10N2O5	5	N-Carbamyl-L-glutamate	6	685386	posneg	23	Amino Acid Metabolism	Histidine metabolism	1	0.658573	0.693008	1	0.920592	0.928007	-0.602586	-0.529056	-0.119367	-0.107793	577745	489077	685386	485362	316546	352048	334818	463618	415858	75535.4	57037.7	71789.2	78312.2	49340.8	60481.2	0	72045.1	117604
87.0683	9.47285	C4H9NO	10	4-Aminobutanal	6	681646	pos	24	Amino Acid Metabolism	Arginine and proline metabolism__beta-Alanine metabolism	1	0.875776	0.678962	1	0.908296	0.697899	-0.191366	-0.558598	-0.138766	-0.518911	353235	641210	387968	366466	423932	420286	379847	334384	224375	622557	224605	590170	261759	681646	362117	277551	324768	400793
219.053	10.1121	C11H9NO4	2	8-Methoxykynurenate	6	677473	neg	24	Amino Acid Metabolism	Tryptophan metabolism	1	1.07678	1.11312	1	1.07148	1.2139	0.10672	0.154604	0.0996041	0.279651	359622	370505	420944	303401	258573	677473	444391	515873	321013	161364	142404	191108	122174	148836	259241	195773	207325	197634
179.079	10.032	C6H13NO5	10	D-Galactosamine	6	672508	neg	24	Carbohydrate Metabolism	Galactose metabolism	1	1.18654	0.698816	1	1.07507	0.974034	0.246755	-0.517016	0.104434	-0.0379567	502916	440088	517695	672508	478193	582471	335638	388040	297082	126214	116290	102102	107144	127764	135568	104092	101679	129886
203.08	10.4878	C8H13NO5	2	N2-Acetyl-L-aminoadipate	6	641165	pos	24	Amino Acid Metabolism	Lysine biosynthesis	1	0.980459	0.88725	1	1.80148	1.28418	-0.0284706	-0.172587	0.84918	0.360843	641165	548010	591139	634421	512777	598328	461859	604594	513131	59035	59001.8	84691.9	94937.5	125878	144396	81637.9	92454.7	86246.8
166.048	11.6235	C5H10O6	8	L-Arabinonate	6	629813	neg	24	Carbohydrate Metabolism	Ascorbate and aldarate metabolism	1	0.81358	0.858498	1	0.910016	0.790871	-0.297643	-0.220114	-0.136036	-0.338485	566463	618609	604044	454882	370896	629813	506335	554853	474765	125399	127959	136995	94840.2	115067	145319	98511.2	99959.7	110247
304.24	3.16138	C20H32O2	46	[FA (20:4)] 5Z,8Z,11Z,14Z-eicosatetraenoic acid	6	624945	neg	24	Lipids: Fatty Acyls	Fatty Acids and Conjugates	1	0.929046	0.830142	1	0.941136	0.897729	-0.106178	-0.268571	-0.0875243	-0.155649	567164	532199	542781	525782	374901	624945	377465	533838	451909	196150	235247	179945	144817	194511	236028	179805	183393	185621
172.048	12.3438	C6H8N2O4	2	Hydantoin-5-propionate	6	619022	neg	15	Amino Acid Metabolism	Histidine metabolism	1	0.513424	0.637294	NA	NA	NA	-0.961777	-0.64997	NA	NA	619022	436634	581305	338962	295495	205998	254549	420350	368325	0	0	0	0	0	0	0	0	0
368.366	2.94337	C24H48O2	15	Tetracosanoic acid	6	595825	neg	24	Lipid Metabolism	Biosynthesis of unsaturated fatty acids	1	0.867272	0.890752	1	1.0366	0.933576	-0.205444	-0.166905	0.0518648	-0.0991602	595825	555482	583828	568507	478864	457462	418356	560793	566425	205608	201989	168261	170066	190721	236149	157990	178560	201056
89.0478	22.245	C3H7NO2	9	D-Alanine	6	586235	neg	24	Amino Acid Metabolism	Alanine and aspartate metabolism__D-Alanine metabolism__Peptidoglycan biosynthesis__Vitamin B6 metabolism	1	1.35049	1.28874	1	1.48213	0.620892	0.43348	0.365961	0.567673	-0.687587	400976	369244	137789	435591	416906	373756	197370	586235	386582	177746	224786	329352	493610	241297	349840	111320	194324	148776
145.074	7.14196	C6H11NO3	9	6-Amino-2-oxohexanoate	6	585113	neg	24	Amino Acid Metabolism	Lysine degradation	1	0.777454	0.689114	1	0.848763	0.488505	-0.36317	-0.537186	-0.236566	-1.03355	319127	585112	449798	513179	265476	274047	336000	295355	301731	265842	243713	249186	177965	280652	185373	108198	122890	139560
244.069	10.7518	C9H12N2O6	3	Pseudouridine	6	550436	neg	24	Nucleotide Metabolism	Pyrimidine metabolism	1	0.787432	0.801382	1	1.02164	0.88487	-0.344773	-0.319438	0.0308905	-0.176462	430567	421808	550436	390984	318370	395264	367356	427314	329518	145267	134682	123384	118506	129066	164490	114243	109173	133482
205.074	7.70969	C11H11NO3	5	Indolelactate	6	548964	negpos	24	Amino Acid Metabolism	Tryptophan metabolism	1	1.04896	0.777106	1	1.19164	1.8261	0.0689594	-0.363816	0.252952	0.868767	282066	275669	548964	539751	318788	302344	223561	347786	288675	12046.2	14817.3	24222.2	13970.3	20454.1	26451.5	37557.8	34753.1	20976.9
190.048	10.1255	C7H10O6	4	[FA hydroxy,oxo(7:0/2:0)] 4-hydroxy-2-oxo-Heptanedioic acid	6	532686	neg	24	Amino Acid Metabolism	Tyrosine metabolism	1	1.05418	0.85391	1	1.14866	0.921682	0.0761177	-0.227844	0.199949	-0.11766	409094	407258	367053	407144	307690	532686	331544	391326	287651	202221	146482	162135	157082	194488	235207	144568	155786	170475
127.063	10.0581	C6H9NO2	7	2,3,4,5-Tetrahydropyridine-2-carboxylate	6	523053	pos	24	Amino Acid Metabolism	Lysine degradation	1	1.08056	0.946628	1	1.16448	1.07253	0.111781	-0.0791304	0.219692	0.101013	447215	476250	414424	523053	420108	502510	383335	521119	362029	318048	309023	289514	338238	364953	364159	342200	297151	343712
214.132	10.7515	C10H18N2O3	2	Dethiobiotin	6	491625	pos	24	Metabolism of Cofactors and Vitamins	Biotin metabolism	1	0.759566	0.879169	1	1.03178	1.31485	-0.396753	-0.185788	0.045131	0.394897	316640	340994	491625	323011	270805	279122	273567	385164	351662	3017.86	5768.63	7033.51	3042.33	4896.58	8383.8	3063.95	5484.41	12252.6
145.085	12.5322	C5H11N3O2	3	4-Guanidinobutanoate	6	472145	pos	24	Amino Acid Metabolism	Arginine and proline metabolism	1	0.977283	0.802286	1	0.940795	0.846066	-0.0331517	-0.317812	-0.0880474	-0.241157	305159	405601	381259	326594	268474	472145	282513	335100	258498	196880	179175	181716	115974	156007	252768	153499	142912	175501
84.0212	12.6684	C4H4O2	2	3-Butynoate	6	466684	negpos	24	Carbohydrate Metabolism	Butanoate metabolism	1	0.942132	0.77243	1	1.06416	0.918251	-0.0859994	-0.372523	0.0897102	-0.123039	404558	426970	384316	366160	312642	466684	277264	363859	298032	304856	293758	275220	255307	342914	331674	265792	261986	274621
340.334	3.00624	C22H44O2	13	Docosanoic acid	6	455994	neg	24	Lipid Metabolism	Biosynthesis of unsaturated fatty acids	1	0.871241	0.919488	1	0.949243	1.20317	-0.198857	-0.121097	-0.0751499	0.266839	431635	429622	401343	455994	324905	319129	323456	436513	400976	112289	129419	73208.5	84740	106164	108028	144187	95230.5	139479
101.048	12.9227	C4H7NO2	5	1-Aminocyclopropane-1-carboxylate	6	450056	neg	24	Amino Acid Metabolism	Methionine metabolism__Propanoate metabolism	1	1.05124	0.830207	1	1.13027	0.869798	0.072094	-0.268457	0.176663	-0.201248	404986	343587	372437	450056	349747	378649	298154	327250	305266	111745	101210	106624	98236.4	132958	130014	84361.3	102533	91073.7
72.021	9.72177	C3H4O2	4	Methylglyoxal	6	445643	neg	24	Amino Acid Metabolism	Glycine, serine and threonine metabolism__Pyruvate metabolism	1	1.27129	1.58704	1	1.10912	1.01791	0.346288	0.66634	0.14941	0.0256061	164423	220191	301134	273207	192608	405966	359953	445643	282715	125244	116046	219304	128898	173305	208648	152513	191461	124867
217.143	12.881	C9H19N3O3	3	gamma-L-Glutamylputrescine	6	423777	pos	23	Amino Acid Metabolism	Arginine and proline metabolism	1	1.291	1.01978	1	1.36537	0.674195	0.368487	0.0282532	0.449296	-0.568762	347969	280377	264987	423777	399019	330496	246826	356291	307884	3634.92	3553.47	4862.2	4352.99	5012.57	7087.99	0	4226.88	3897.56
306.256	3.18516	C20H34O2	29	Icosatrienoic acid	6	409794	neg	24	Lipids: Fatty Acyls	Biosynthesis of unsaturated fatty acids	1	1.15546	1.01777	1	1.11028	1.0517	0.208468	0.0254077	0.150919	0.0727208	316908	236500	271789	409794	222607	321083	213715	395859	230284	87620.9	65157.5	75430.3	82591.5	77423.1	93360.1	76028.6	67819.6	96158.4
214.024	11.7366	C5H11O7P	6	2-Deoxy-D-ribose 5-phosphate	6	406324	neg	15	Carbohydrate Metabolism	Pentose phosphate pathway	1	1.25611	0.898551	NA	NA	NA	0.32896	-0.154328	NA	NA	272976	182471	291216	406324	291118	240446	199033	267732	204150	0	0	0	0	0	0	0	0	0
150.068	4.31266	C9H10O2	10	Phenylpropanoate	6	377368	neg	24	Amino Acid Metabolism	Phenylalanine metabolism	1	0.891141	0.90405	1	0.681262	0.884767	-0.166275	-0.145525	-0.553718	-0.17663	377368	216198	222522	274836	198898	253515	284728	223863	229194	184200	138758	190813	117030	111008	121975	143206	163251	148111
216.111	8.25763	C9H16N2O4	3	gamma-Glutamyl-gamma-aminobutyraldehyde	6	374022	pos	24	Amino Acid Metabolism	Arginine and proline metabolism	1	1.51916	0.343407	1	1.77454	0.908033	0.603278	-1.54201	0.827449	-0.139183	284020	107569	100583	374022	217651	156017	37803.2	53347	77864.8	4477.23	3153.09	5431.92	6799.56	10814.4	5565.61	4780.47	3602.11	3478.37
290.111	12.6503	C11H18N2O7	2	N-Succinyl-LL-2,6-diaminoheptanedioate	6	367286	pos	24	Amino Acid Metabolism	Lysine biosynthesis	1	0.998934	0.831416	1	1.20697	1.2189	-0.00153851	-0.266358	0.271389	0.285585	291675	348519	336350	367286	279900	328317	253521	317615	240778	65634.8	58545.9	62063.6	58915.4	87613.6	78262.2	74902.2	61808.2	90303.6
190.095	18.4791	C7H14N2O4	5	LL-2,6-Diaminoheptanedioate	6	359059	pos	24	Amino Acid Metabolism	Lysine biosynthesis	1	1.06629	0.690381	1	1.3839	1.0333	0.0925975	-0.534535	0.468744	0.0472566	183231	243055	317455	281436	152547	359059	153057	231534	128873	102290	84600.7	94704.6	112864	111153	165684	90760.7	93777.1	106434
206.043	12.7851	C7H10O7	5	2-Hydroxybutane-1,2,4-tricarboxylate	6	358953	neg	24	Amino Acid Metabolism	Lysine biosynthesis__Pyruvate metabolism	1	1.0394	0.683542	1	1.15104	1.05893	0.055753	-0.548899	0.202944	0.0826062	238118	246461	204276	210920	146124	358953	139719	192505	138637	106068	83890.9	82648.9	84011.3	95613.9	134158	104383	88350.2	95938.8
325.101	11.9368	C11H19NO10	1	N-Glycoloyl-neuraminate	6	356694	neg	22	Carbohydrate Metabolism	Aminosugars metabolism	1	0.598568	0.770674	1	0.573228	0.89482	-0.740412	-0.375808	-0.80282	-0.160331	284555	279449	356694	239321	167836	143943	199498	275171	234888	9086.28	4241.81	0	4025.76	3614.27	0	4136.27	3228.34	4561.62
146.058	7.29125	C6H10O4	16	(R)-3-Hydroxy-3-methyl-2-oxopentanoate	6	355132	neg	24	Amino Acid Metabolism	Valine, leucine and isoleucine biosynthesis	1	2.20715	0.808361	1	0.517878	0.894778	1.14218	-0.306928	-0.949316	-0.160399	105304	75617.8	127273	355132	220262	104839	54187.7	134986	59959.1	50873.9	45442	31417.4	11176.4	41154.3	13819.5	43164.9	40637.4	30490.6
299.283	3.47358	C18H37NO2	7	[FA (16:2)] N-hexadecyl-ethanolamine	6	325187	pos	24	Lipids: Fatty Acyls	Fatty amides	1	0.569322	1.15462	1	0.358922	1.19166	-0.812683	0.207412	-1.47826	0.252977	226096	241131	107833	88041.4	181948	57405.8	182170	234613	247191	265332	197474	212482	45201.9	144885	52289	291425	188105	325187
200.009	10.8021	C4H9O7P	4	Erythrulose 1-phosphate	6	324427	posneg	15	Carbohydrate Metabolism	0	1	1.18447	0.779097	NA	NA	NA	0.244246	-0.360126	NA	NA	222534	204028	230154	324427	251987	201449	124345	182995	204306	0	0	0	0	0	0	0	0	0
163.048	12.3987	C5H9NO5	4	L-erythro-4-Hydroxyglutamate	6	322899	neg	24	Amino Acid Metabolism	Arginine and proline metabolism	1	0.844884	0.676021	1	0.972164	0.831127	-0.243175	-0.564861	-0.0407286	-0.26686	266391	230634	322899	281293	162623	248824	179390	207296	167599	67232.4	65590.6	52872.4	36160.3	63115.4	81250.7	65759	36081.7	52495.9
309.986	12.8745	C5H12O11P2	3	D-Ribulose 1,5-bisphosphate	6	318455	neg	15	Carbohydrate Metabolism	Glyoxylate and dicarboxylate metabolism__Carbon fixation	1	1.09113	0.572207	NA	NA	NA	0.125823	-0.80539	NA	NA	276970	145760	186853	318455	191526	155154	92469.3	125424	130914	0	0	0	0	0	0	0	0	0
152.992	12.9401	C3H7NO2S2	1	Thiocysteine	6	312613	neg	24	Amino Acid Metabolism	Cysteine metabolism	1	1.2714	1.0412	1	1.305	0.665966	0.346423	0.0582428	0.384051	-0.58648	138764	200097	178654	173002	172356	312613	185751	195811	157273	62214.4	89875.6	117309	100784	104533	146249	36959.5	78903.2	63548.1
227.091	7.16081	C9H13N3O4	1	Deoxycytidine	6	312102	pos	24	Nucleotide Metabolism	Pyrimidine metabolism	1	1.08928	1.21355	1	1.90273	0.803166	0.123376	0.279238	0.928068	-0.31623	39001.8	73346.1	21647.3	37307	47478.9	61172.4	41361.5	62225.1	59023.7	96923.1	132540	234181	287835	282251	312102	121646	139615	111122
165.079	12.45	C9H11NO2	7	D-Phenylalanine	6	277894	neg	24	Amino Acid Metabolism	Phenylalanine metabolism	1	1.00472	0.861552	1	1.1529	0.905289	0.00679024	-0.214991	0.205264	-0.143549	175873	252646	253837	248664	159016	277894	178705	229898	179282	129357	174042	131593	132806	181071	187625	130328	121532	141934
308.272	3.14726	C20H36O2	28	Icosadienoic acid	6	276231	neg	23	Lipid Metabolism	Biosynthesis of unsaturated fatty acids	1	1.36466	0.697127	1	0.936388	0.619375	0.448546	-0.520506	-0.0948212	-0.691115	174594	127811	165364	276231	184438	177677	141493	65773.4	118828	33104.9	33956.2	24787.2	33862.1	27099.7	25043.9	39702	17186.5	0
74.0003	12.7114	C2H2O3	1	Glyoxylate	6	261123	neg	24	Nucleotide Metabolism	Purine metabolism__Caffeine metabolism__Glycine, serine and threonine metabolism__Arginine and proline metabolism__1,4-Dichlorobenzene degradation__Glyoxylate and dicarboxylate metabolism__C5-Branched dibasic acid metabolism	1	1.0775	0.891719	1	0.917703	0.874459	0.107686	-0.165339	-0.123901	-0.193538	182574	178202	186996	261123	178235	150865	157069	166826	164565	114279	98005.4	118891	83660.9	94741.7	125519	89467.1	90469.4	109663
443.025	13.5982	C10H15N5O11P2	1	GDP	6	259125	negpos	15	Nucleotide Metabolism	Purine metabolism	1	0.858626	0.795704	NA	NA	NA	-0.219898	-0.329696	NA	NA	235975	174679	259125	258354	177894	138842	137838	195237	199870	0	0	0	0	0	0	0	0	0
424.037	11.577	C12H18N4O7P2S	1	Thiamin diphosphate	6	258115	pos	15	Carbohydrate Metabolism	Glycolysis / Gluconeogenesis__Citrate cycle (TCA cycle)__Alanine and aspartate metabolism__Valine, leucine and isoleucine degradation__Butanoate metabolism__Thiamine metabolism	1	0.632248	1.14319	NA	NA	NA	-0.661438	0.193062	NA	NA	143656	205636	235987	163766	91734.7	114540	205409	258115	205559	0	0	0	0	0	0	0	0	0
366.35	2.94592	C24H46O2	6	[FA (24:0)] 15Z-tetracosenoic acid	6	254071	negpos	24	Lipids: Fatty Acyls	Fatty Acids and Conjugates	1	0.966664	0.910227	1	1.14146	0.90381	-0.0489131	-0.135702	0.190884	-0.145908	252301	214610	250431	246480	192878	254071	204975	213390	234579	82890.9	85061.3	63081.2	77077.5	82253.7	104385	54816.1	81118.7	72875.6
190.048	13.5999	C7H10O6	4	[FA hydroxy(7:1/2:0)] 2,4-dihydroxy-2-heptenedioc acid	6	248136	neg	24	Amino Acid Metabolism	Tyrosine metabolism	1	0.688967	0.363963	1	1.01424	0.896405	-0.537494	-1.45814	0.0203988	-0.157778	154089	115294	248136	170025	74438.9	112090	56493.5	80801.5	51062.8	16062.2	14303.4	18124.6	15468.4	14932.2	18780.1	17609.6	13420.2	12437.1
332.272	3.17397	C22H36O2	9	[FA (22:4)] 7Z,10Z,13Z,16Z-docosatetraenoic acid	6	237129	neg	24	Lipids: Fatty Acyls	Fatty Acids and Conjugates	1	1.24646	1.12212	1	1.12596	1.06516	0.317837	0.166226	0.171161	0.0910682	172107	154474	167436	237129	193312	185333	157114	225077	172155	19842.5	79846.5	26139.4	48521.2	59579.7	33577.3	26225.3	76069	31732.8
126.008	11.7548	C2H7O4P	2	2-Hydroxyethylphosphonate	6	226154	neg	15	Amino Acid Metabolism	Aminophosphonate metabolism	1	0.359051	1.14915	NA	NA	NA	-1.47774	0.200565	NA	NA	98956.8	96989.7	226154	59069.6	51313.5	41172.7	166488	200998	117570	0	0	0	0	0	0	0	0	0
290.04	12.6846	C7H15O10P	6	D-Sedoheptulose 7-phosphate	6	223346	neg	15	Carbohydrate Metabolism	Pentose phosphate pathway__Carbon fixation	1	0.358637	0.8036	NA	NA	NA	-1.4794	-0.31545	NA	NA	199895	223346	181589	121438	44975.3	50500.8	74180.6	195687	216174	0	0	0	0	0	0	0	0	0
481.989	12.472	C10H17N2O14P3	1	dTTP	6	221890	neg	15	Nucleotide Metabolism	Pyrimidine metabolism	1	0.838279	1.02846	NA	NA	NA	-0.254497	0.0404828	NA	NA	139375	141542	154486	177466	113736	73787.5	102825	123079	221890	0	0	0	0	0	0	0	0	0
132.09	12.8634	C5H12N2O2	6	(2R,4S)-2,4-Diaminopentanoate	6	214433	neg	24	Amino Acid Metabolism	D-Arginine and D-ornithine metabolism	1	1.06563	0.95349	1	0.994319	0.85136	0.0917118	-0.0687097	-0.00821975	-0.232159	154808	179423	166814	165176	154322	214433	132375	198364	147002	148433	139535	122839	125691	132866	149916	110247	119208	120289
197.069	10.3882	C9H11NO4	2	3,4-Dihydroxy-L-phenylalanine	6	212120	posneg	24	Amino Acid Metabolism	Tyrosine metabolism	1	0.838792	0.746244	1	0.989975	0.946395	-0.253615	-0.422281	-0.0145366	-0.0794857	143934	180705	155080	100353	89911.9	212120	115845	125240	116902	49886.8	52015.7	52026	27813.3	46678.3	77893.8	41189.5	42805.9	61681.7
188.127	18.4215	C7H16N4O2	5	Homoarginine	6	207199	pos	24	Amino Acid Metabolism	0	1	0.966206	0.628302	1	1.41903	1.00633	-0.049597	-0.670471	0.504907	0.0091061	97337.3	127784	207199	147126	85467.5	185117	69274.7	129018	73335.1	36487.8	37805.4	33777.5	42105.5	43703	67547.3	34828.1	32915.6	41011.3
195.09	4.43198	C10H13NO3	6	L-Tyrosine methyl ester	6	201957	pos	24	Amino Acid Metabolism	0	1	0.77349	0.726359	1	0.679876	0.961659	-0.370546	-0.461246	-0.556657	-0.0564032	194708	127144	201957	148871	121017	135273	115712	130985	133776	49855.2	51275.4	49508.9	17606.8	58035.1	26774.2	54994.3	45948.4	43921.2
665.125	10.9483	C21H29N7O14P2	1	NADH	6	196310	neg	15	Energy Metabolism	Oxidative phosphorylation	1	0.290224	0.696231	NA	NA	NA	-1.78476	-0.522362	NA	NA	130636	109894	196310	60372	19551.2	46858.2	75280.3	142759	86101.8	0	0	0	0	0	0	0	0	0
203.079	12.6159	C8H13NO5	2	N2-Acetyl-L-aminoadipate	6	172363	pos	24	Amino Acid Metabolism	Lysine biosynthesis	1	0.659509	0.742379	1	1.01981	1.02144	-0.600536	-0.429772	0.0282974	0.0306004	135208	151568	172363	121546	41659.6	139602	145202	98069.4	97584.4	51702.9	54464.8	45428.2	35887.1	56242.1	62469.6	49423.8	43965.1	61456.8
161.069	9.88092	C6H11NO4	10	4-Methyl-L-glutamate	6	171847	pos	24	Carbohydrate Metabolism	C5-Branched dibasic acid metabolism	1	0.737156	1.12195	1	1.24223	0.980003	-0.439957	0.166008	0.312935	-0.0291418	162698	86833.9	155406	93737.5	100066	104699	128332	154140	171847	44382.7	40160.2	35091.4	44729.6	49542	54342	34173.3	41753.9	41314.7
161.048	8.12691	C9H7NO2	7	4,6-Dihydroxyquinoline	6	161649	posneg	24	Amino Acid Metabolism	Tryptophan metabolism	1	0.954429	0.906005	1	1.02819	0.946408	-0.0672906	-0.142409	0.0401052	-0.0794652	134706	139215	148499	129129	112392	161649	119883	151941	110891	63792.1	58729.6	54891.8	42435.4	58774.9	81204.4	58049.6	49875.9	59980.3
392.293	3.94887	C24H40O4	51	[ST hydrox] 3alpha,7alpha-Dihydroxy-5beta-cholan-24-oic Acid	6	160720	neg	24	Lipids: Sterol lipids	Bile acids and derivatives	1	1.33681	0.989917	1	0.81941	0.862719	0.418791	-0.0146204	-0.287342	-0.213038	111698	102960	91570.7	142519	106130	160720	104028	126697	72416.1	39164.1	64753.1	35132.1	31993.9	39016.5	42928.1	47285.5	32963.6	39711.4
191.058	7.18696	C10H9NO3	5	5-Hydroxyindoleacetate	6	158472	pos	24	Amino Acid Metabolism	Tryptophan metabolism	1	0.878199	1.00493	1	0.913326	1.24725	-0.18738	0.00709496	-0.130799	0.318754	148979	128152	139213	121835	93649.1	150149	158472	134196	125730	54958.8	40320.1	48109.6	29499.4	47164.2	54296.9	53838	52627.7	72376
220.085	10.1103	C11H12N2O3	3	5-Hydroxy-L-tryptophan	6	153251	pos	24	Amino Acid Metabolism	Tryptophan metabolism	1	0.843579	1.00612	1	1.12829	1.23115	-0.245405	0.00879934	0.174139	0.300001	110891	107774	137157	89107.7	57805.5	153251	111758	118826	127415	38927.7	33484.9	35631.3	20825.7	40287.8	60791.6	51273.7	39239.2	42504.9
219.074	12.5535	C8H13NO6	4	O-Succinyl-L-homoserine	6	150945	posneg	24	Amino Acid Metabolism	Methionine metabolism__Sulfur metabolism	1	1.32523	0.942299	1	1.90097	1.16536	0.406241	-0.0857428	0.926737	0.220771	101150	82155.3	96498.7	150945	118526	101334	106138	83288.4	74232.9	15755.9	26644.2	26977.8	59334.8	39988.5	32562.1	17809	33855.6	29185.3
465.309	4.30906	C26H43NO6	2	Glycocholate	6	148996	neg	24	Lipid Metabolism	Bile acid biosynthesis	1	1.06756	0.840589	1	1.02466	0.824771	0.0943106	-0.250528	0.0351387	-0.277935	124561	113050	107724	117707	101961	148996	102775	106867	80642.8	68491.2	60672.2	64669.3	57268.9	59923.6	81419.3	49943.4	55411.3	54512.8
152.047	12.8865	C8H8O3	25	4-Hydroxyphenylacetate	6	147623	neg	24	Amino Acid Metabolism	Tyrosine metabolism__Phenylalanine metabolism	1	0.954839	1.10877	1	1.07683	0.83236	-0.0666709	0.148963	0.10679	-0.26472	95095.4	111843	101382	83661.1	73934.5	136800	114290	147623	79943.1	28754	31201	28723.4	24019.3	28543.7	42928.6	20030.3	27182.8	26599.3
110.048	12.4311	C5H6N2O	2	Imidazole-4-acetaldehyde	6	144421	pos	24	Amino Acid Metabolism	Histidine metabolism	1	0.944737	0.722192	1	0.80998	0.945456	-0.0820149	-0.469545	-0.304041	-0.0809179	77330	84256	144421	110218	59819.1	119059	48628.3	104972	67395.4	25774.1	35167.2	22600.7	22461.4	17920.2	27285.7	20125.3	20360	38499.9
114.043	10.6283	C4H6N2O2	6	5,6-Dihydrouracil	6	142937	pos	24	Nucleotide Metabolism	Pyrimidine metabolism__beta-Alanine metabolism__Pantothenate and CoA biosynthesis	1	0.994871	0.773157	1	1.10965	0.921381	-0.00741854	-0.371166	0.150101	-0.118131	105120	123331	108343	105577	86553.6	142937	81252.4	98987.5	80155.2	64400.8	52500.4	55678.7	44955.8	66350.4	80196.7	52341.3	51427.9	55242.7
220.085	11.3298	C11H12N2O3	3	5-Hydroxy-L-tryptophan	6	137424	neg	15	Amino Acid Metabolism	Tryptophan metabolism	1	0.642583	0.991457	NA	NA	NA	-0.638046	-0.0123777	NA	NA	112276	95593.4	136966	74810	52331.3	94443.8	103897	137424	100568	0	0	0	0	0	0	0	0	0
194.043	13.1451	C6H10O7	16	D-Glucuronate	6	125258	neg	24	Carbohydrate Metabolism	Pentose and glucuronate interconversions__Ascorbate and aldarate metabolism__Starch and sucrose metabolism__Inositol phosphate metabolism	1	0.994864	0.865047	1	0.93284	0.828254	-0.00742828	-0.209149	-0.100298	-0.271856	98446.6	107307	94683	90522.3	83112.9	125258	87058.5	92243.1	80590	57637.1	50724.6	47700.4	45021.8	49197.2	51361.9	40767.1	40729.4	47762.4
472.112	11.4136	C14H26N4O10P2	1	CMP-N-trimethyl-2-aminoethylphosphonate	6	121238	neg	15	Lipid Metabolism	Aminophosphonate metabolism	1	0.959468	1.02088	NA	NA	NA	-0.0596936	0.0298093	NA	NA	83150.2	82864	121238	116694	76297.9	82617.2	91035.3	118513	83701.4	0	0	0	0	0	0	0	0	0
226.095	7.93944	C10H14N2O4	2	Porphobilinogen	6	115289	posneg	24	Metabolism of Cofactors and Vitamins	Porphyrin and chlorophyll metabolism	1	0.731893	0.564174	1	0.893281	0.981715	-0.450294	-0.825788	-0.162815	-0.0266239	109241	80129.4	115289	104909	59842.9	58226.9	45262.7	66639.8	59978.6	3866.43	3950.36	4557.44	3041.4	4714.21	3298.05	4554.67	3055.64	4537.66
113.048	8.88929	C5H7NO2	6	(S)-1-Pyrroline-5-carboxylate	6	113015	pos	24	Amino Acid Metabolism	Glutamate metabolism__Arginine and proline metabolism	1	0.710383	0.64928	1	0.67565	0.891782	-0.493331	-0.623087	-0.565652	-0.165237	111797	113015	69433.4	61985.5	68706.4	78334.6	58634.9	70326.7	62085.8	76057.7	57153.5	49286.1	34759.7	48387.6	40157.1	52155.5	46661.6	63930.7
182.079	11.9444	C6H14O6	6	D-Sorbitol	6	111617	neg	24	Carbohydrate Metabolism	Fructose and mannose metabolism__Galactose metabolism	1	0.70724	0.811715	1	0.6447	0.475203	-0.499729	-0.300956	-0.633299	-1.07338	94877.7	83010.2	111617	97800.4	55494.4	51454.5	64436.4	90816.4	79742.6	28689.8	58039.1	70279.1	25826.9	36126.3	39270	27050.9	24243.5	23316.3
254.1	11.4236	C9H18O8	2	3-beta-D-Galactosyl-sn-glycerol	6	110943	neg	24	Carbohydrate Metabolism	Galactose metabolism__Glycerolipid metabolism	1	0.885981	1.09944	1	1.00318	0.999806	-0.174652	0.136766	0.0045857	-0.000280267	71416.7	79827.2	110943	80407.7	72053.4	79831.9	104735	106942	76581.7	9680	13687.4	9682.81	7937.54	9403.12	15814.7	11760.6	10110.1	11173.1
468.063	11.117	C14H22N4O8P2S	1	2-(alpha-Hydroxyethyl)thiamine diphosphate	6	107908	neg	15	Carbohydrate Metabolism	Glycolysis / Gluconeogenesis__Alanine and aspartate metabolism__Valine, leucine and isoleucine biosynthesis__Pyruvate metabolism__Butanoate metabolism	1	0.810088	0.510457	NA	NA	NA	-0.30385	-0.970139	NA	NA	87206.7	98601.7	73218.6	107908	53896.4	48030	33358	46612.4	52251.8	0	0	0	0	0	0	0	0	0
111.993	11.8264	CH5O4P	2	Hydroxymethylphosphonate	6	107741	neg	15	Amino Acid Metabolism	Aminophosphonate metabolism	1	0.917861	0.680368	NA	NA	NA	-0.123653	-0.555613	NA	NA	91889.2	72256.1	93161.6	107741	82311.8	46119.3	50429.1	54836.1	69798.1	0	0	0	0	0	0	0	0	0
209.069	6.99638	C10H11NO4	3	4-Hydroxyphenylacetylglycine	6	104949	posneg	24	Amino Acid Metabolism	Tyrosine metabolism	1	1.7663	0.815774	1	0.62613	0.967638	0.820732	-0.293758	-0.675466	-0.0474601	39977	36790.6	33431.1	59074.7	30620.6	104949	31323.6	32773	25800.7	16703.2	13268.3	17869.5	6606.33	14188	9160.41	13039.5	12160.5	21092.8
176.069	8.83194	C7H12O5	7	(2S)-2-Isopropylmalate	6	104326	neg	24	Amino Acid Metabolism	Valine, leucine and isoleucine biosynthesis__Pyruvate metabolism	1	0.869571	0.787487	1	0.75705	0.89415	-0.201625	-0.344673	-0.40154	-0.161411	102052	75033.2	92117.3	104326	73259.8	56505.1	58369.5	75173.6	78450.6	14223.1	14960.4	9674.61	9651.54	9157.91	10608.1	10324.7	11156.1	13264.2
135.068	4.31115	C8H9NO	4	2-Phenylacetamide	6	101788	pos	24	Amino Acid Metabolism	Phenylalanine metabolism__Styrene degradation	1	1.21633	1.2516	1	0.739677	0.905851	0.282535	0.323775	-0.435032	-0.142655	77720.5	50576.7	90981.7	92268.9	101788	72658.6	92527.1	97930.1	83992.5	76345.1	55206	55060.2	36443.5	55747.1	45841.6	51298.8	44835.4	72907.8
278.127	4.41919	C14H18N2O4	3	alpha-Ribazole	6	101002	pos	24	Metabolism of Cofactors and Vitamins	Riboflavin metabolism__Porphyrin and chlorophyll metabolism	1	0.879637	0.864023	1	1.03982	1.06376	-0.18502	-0.210859	0.0563278	0.0891672	42118.4	38772.3	101002	70510.6	47481.6	42007.2	33508.8	43526.8	80123.6	15788.4	34785.2	18519.3	21205.5	29123.8	21514.5	34259.8	20326.3	18911.8
139.987	11.9318	C2H5O5P	2	Acetyl phosphate	6	100211	neg	15	Amino Acid Metabolism	Taurine and hypotaurine metabolism__Pyruvate metabolism	1	1.01661	0.620815	NA	NA	NA	0.0237715	-0.687765	NA	NA	89072	49224.6	78373.9	100211	53947.9	66111.7	43680.3	39344.6	51487.4	0	0	0	0	0	0	0	0	0
152.068	11.4154	C5H12O5	4	Xylitol	6	93618	neg	24	Carbohydrate Metabolism	Pentose and glucuronate interconversions	1	0.847475	0.857307	1	1.03728	0.977697	-0.238757	-0.222116	0.0528036	-0.0325404	76894.2	79343	93618	71801.4	57430.9	82513.9	59915.3	71081.3	83206.1	42827.7	39327.9	38223.2	38773	40967.8	45125.6	40231.5	39998.6	37463.9
605.077	13.7817	C16H25N5O16P2	7	GDP-mannose	6	90791	neg	15	Carbohydrate Metabolism	Fructose and mannose metabolism__Ascorbate and aldarate metabolism__N-Glycan biosynthesis	1	0.60922	0.797489	NA	NA	NA	-0.714965	-0.326464	NA	NA	72293	50044.1	90791.4	55340.1	35602.6	38899.3	40227	62790.1	66950.5	0	0	0	0	0	0	0	0	0
211.048	8.37232	C9H9NO5	5	5-(2'-Formylethyl)-4,6-dihydroxypicolinate	6	87796	posneg	24	Amino Acid Metabolism	Tryptophan metabolism	1	0.913524	0.78533	1	0.947307	0.85762	-0.130485	-0.348628	-0.0780962	-0.22159	68783.5	62342.7	59130.3	45997.7	40010.1	87796.2	46012.5	59044.6	44357.2	23549.1	15347.2	24768.3	13844.9	15832.3	30632.7	19698.5	14852.2	20049.3
189.043	7.83895	C10H7NO3	6	Kynurenate	6	83589	neg	24	Amino Acid Metabolism	Tryptophan metabolism	1	0.799948	0.921245	1	0.904507	1.03077	-0.322023	-0.118344	-0.144796	0.0437252	63748.7	56356.9	82102.1	43184.5	34981.6	83589.4	62431.4	74815.6	49035.8	27175.7	28784.2	22325.8	15432.3	18976	36401.6	28737.3	27363	24594.4
123.983	10.9049	C2H4O4S	1	Sulfoacetaldehyde	6	80711	neg	24	Amino Acid Metabolism	Taurine and hypotaurine metabolism	1	0.909219	0.906789	1	0.611786	0.729797	-0.1373	-0.141162	-0.7089	-0.454434	73666.1	68233.8	37194	47479.4	34645.2	80711	55610.3	56730	50059.9	28918.5	30048.2	31335.1	15166.2	13448	26631.3	20814.3	21513.7	23574
162.035	7.2611	C6H10O3S	3	1,2-Dihydroxy-5-(methylthio)pent-1-en-3-one	6	76193	pos	21	Amino Acid Metabolism	Methionine metabolism	1	1.07511	1.07488	1	2.14087	0.245301	0.104485	0.104171	1.09819	-2.02738	38890.8	44378	76193.1	70633.7	46587.3	54218.3	51486.7	74029.2	45885.9	0	2029.87	13016.6	4123.26	7912.34	20177	0	3690.92	0
167.982	10.808	C3H5O6P	3	3-Phosphonopyruvate	6	75900	neg	15	Amino Acid Metabolism	Aminophosphonate metabolism	1	1.19825	0.769115	NA	NA	NA	0.260931	-0.37873	NA	NA	46001.4	47757.7	48480.9	75900	48777.1	45762.3	28259.6	40651.7	40487.7	0	0	0	0	0	0	0	0	0
207.053	7.45268	C10H9NO4	6	4-(2-Aminophenyl)-2,4-dioxobutanoate	6	71237	pos	24	Amino Acid Metabolism	Tryptophan metabolism	1	0.798902	0.865484	1	0.765855	0.87644	-0.32391	-0.208421	-0.384857	-0.190273	52585.3	68660.6	53601.4	32366.2	36082.7	71236.9	50838.3	50959.9	49529.3	21647	20672.2	27359.1	8394.48	22488.4	22480.6	22784.5	18052.1	20232.3
176.068	11.3344	C7H12O5	7	(2R,3S)-3-Isopropylmalate	6	70070	neg	24	Amino Acid Metabolism	Valine, leucine and isoleucine biosynthesis	1	1.08609	0.888203	1	0.942448	0.975174	0.11914	-0.171039	-0.0855146	-0.0362686	46627	52128.5	61382.6	57251.9	46602.3	70069.8	47431.5	46756.6	48047.1	35069.4	28920.9	30504	26792.9	33828.5	28434.6	26337.1	31654.7	34156.5
482.985	13.7576	C9H16N3O14P3	1	CTP	6	69482	negpos	15	Nucleotide Metabolism	Pyrimidine metabolism	1	0.550329	0.614541	NA	NA	NA	-0.861633	-0.702419	NA	NA	63043.7	45015	69481.9	42729.9	29896.4	25079.5	29182.9	35101.6	44821.5	0	0	0	0	0	0	0	0	0
191.058	9.95407	C10H9NO3	5	5-Hydroxyindoleacetate	6	68902	neg	23	Amino Acid Metabolism	Tryptophan metabolism	1	1.27563	1.06783	1	0.634564	1.28416	0.351206	0.0946798	-0.656162	0.360829	41432.9	25186.2	36245.7	30781.3	31533.5	68902.3	32702.1	48727.7	28412.1	6054.28	3691.4	7083.23	0	5172.69	5506.33	8537.62	6397.22	6676.23
194.043	9.99982	C6H10O7	16	3-Dehydro-L-gulonate	6	66679	neg	24	Carbohydrate Metabolism	Pentose and glucuronate interconversions__Ascorbate and aldarate metabolism	1	0.785951	0.721155	1	1.04641	0.834715	-0.347489	-0.471618	0.0654419	-0.260645	49428.7	66678.7	61807.3	50349.5	31696.7	57786	38147.1	51236.5	38920.5	17032.7	17248	18885.8	12302.9	19961.4	23369.6	13764.9	14853.5	15760.6
236.079	8.54436	C11H12N2O4	2	L-Formylkynurenine	6	64523	posneg	24	Amino Acid Metabolism	Tryptophan metabolism	1	0.778371	0.670799	1	0.777335	0.823868	-0.36147	-0.576048	-0.363392	-0.279514	53387.9	49111.4	64522.6	39484.3	29058.8	61461.9	33866.9	45384.5	32786.7	13414.1	7009.14	15828.3	7246.27	7671.05	13262.3	9272.38	8891.68	11702.4
174.064	10.2329	C6H10N2O4	4	N-Formimino-L-glutamate	6	60755	pos	24	Amino Acid Metabolism	Histidine metabolism	1	0.573454	0.774175	1	1.06218	0.817205	-0.802251	-0.369269	0.0870336	-0.29123	48404	45259.3	60755.3	27312.6	38639.3	22599.9	33871.2	30954.4	54721.3	13310.9	16398.6	13802.9	16090.1	12320.4	17807.7	11717	11349.4	12492.2
240.122	11.6682	C10H16N4O3	4	Homocarnosine	6	52887	negpos	24	Amino Acid Metabolism	Arginine and proline metabolism	1	0.765044	0.69467	1	0.71659	1.031	-0.386385	-0.5256	-0.48078	0.044042	39301.9	44363	52887.1	32330	28030.6	44107.8	27292.3	38675.8	28890.4	5269.05	6644.73	2529.75	2715.64	5424.2	2210.25	4633.96	3629.88	6627.41
402.023	11.6767	C10H16N2O11P2	1	dTDP	6	52294	neg	15	Nucleotide Metabolism	Pyrimidine metabolism	1	0.878812	0.844351	NA	NA	NA	-0.186373	-0.244085	NA	NA	36959.6	30984.7	52293.8	47436.3	30197.3	28033.1	28772.7	41104	31646.4	0	0	0	0	0	0	0	0	0
463.074	13.4253	C14H18N5O11P	1	N6-(1,2-Dicarboxyethyl)-AMP	6	48974	pos	15	Nucleotide Metabolism	Purine metabolism__Alanine and aspartate metabolism	1	0.880965	0.739031	NA	NA	NA	-0.182843	-0.436292	NA	NA	28219.8	13485.6	45852.9	48973.7	13424.7	14737.4	12674.4	32741	19292.9	0	0	0	0	0	0	0	0	0
210.074	13.4254	C7H14O7	4	Sedoheptulose	6	48361	neg	15	Energy Metabolism	Carbon fixation	1	0.64067	1.04251	NA	NA	NA	-0.642346	0.0600613	NA	NA	37933.1	40768.4	40495.1	28289.1	21590.3	26486.3	39335.4	48360.6	36567.7	0	0	0	0	0	0	0	0	0
192.063	11.1416	C7H12O6	6	Quinate	6	48318	neg	24	Amino Acid Metabolism	Phenylalanine, tyrosine and tryptophan biosynthesis	1	0.941915	0.626212	1	0.973231	1.06222	-0.0863316	-0.675277	-0.0391463	0.0870794	39672.7	30516.2	40767.6	28163.8	28030.1	48317.6	26994.3	20586	21902	19940.1	13850.6	20848.7	16762.5	14738.9	21675.3	17173.5	17734.1	23131.3
158.033	10.2433	C5H6N2O4	3	(S)-Dihydroorotate	6	47368	neg	18	Nucleotide Metabolism	Pyrimidine metabolism	1	0.540929	0.649877	NA	NA	NA	-0.886489	-0.621761	NA	NA	35477.9	28119.3	47367.9	24140.4	13763.3	22120.5	17783.9	30836.2	23493.5	0	0	0	7798.08	8626.9	4707.02	0	0	0
165.043	9.90795	C8H7NO3	8	4-Pyridoxolactone	6	45280	neg	24	Metabolism of Cofactors and Vitamins	Vitamin B6 metabolism	1	1.08317	0.970793	1	1.06149	0.984223	0.115258	-0.042765	0.0860872	-0.0229427	42393	41293.7	37382.2	45279.8	44428.4	41429.9	36398	40251.9	40883	32430.1	36392.9	31891.2	36599.3	34884.8	35422.7	31383.9	33175.1	34566.2
176.043	13.2434	C5H8N2O5	2	N-Carbamoyl-L-aspartate	6	42751	neg	15	Nucleotide Metabolism	Pyrimidine metabolism__Alanine and aspartate metabolism	1	0.494036	0.639881	NA	NA	NA	-1.01731	-0.644124	NA	NA	34057.2	30937.9	42750.6	25356.9	13592.3	14281.1	18158.9	21779.5	29006	0	0	0	0	0	0	0	0	0
217.106	10.6034	C8H15N3O4	3	N-Acetyl-L-citrulline	6	42414	neg	15	Amino Acid Metabolism	arginine biosynthesis III	1	0.778751	0.733314	NA	NA	NA	-0.360765	-0.447498	NA	NA	42413.8	28386.5	34319.9	34679.4	19785.9	27397.2	17125.1	32483.6	27477.3	0	0	0	0	0	0	0	0	0
244.088	8.32973	C10H16N2O3S	1	Biotin	6	41731	pos	24	Metabolism of Cofactors and Vitamins	Biotin metabolism	1	0.872148	0.6811	1	1.13065	0.789673	-0.197355	-0.554062	0.177151	-0.340672	35314.6	34412.4	41730.8	38453.2	25531.6	33223	24515.6	25303.5	26094.8	11664.2	4808.57	8148.96	6578.51	12172.5	9087.53	7368.74	4556.56	7517.85
192.027	23.8158	C6H8O7	12	Isocitrate	6	40202	neg	24	Carbohydrate Metabolism	Citrate cycle (TCA cycle)__Glyoxylate and dicarboxylate metabolism__Reductive carboxylate cycle (CO2 fixation)	1	1.04848	0.99784	1	1.17723	1.3066	0.0682963	-0.0031202	0.235397	0.38582	33098.3	35487.3	33666	33776.5	33229.8	40202.3	34888.3	37522.9	29619.5	22569.2	23738.4	22202.4	25385	30399	24868.1	25616.4	37148.7	26750.3
142.074	24.0562	C6H10N2O2	1	Ectoine	6	40168	neg	24	Amino Acid Metabolism	Glycine, serine and threonine metabolism	1	0.978693	0.998185	1	1.00608	1.02997	-0.0310711	-0.00262136	0.00874871	0.0426062	32378.8	35988.4	36266.5	33477.5	36191.3	32735.5	36103.7	30963.1	37376.9	38368.3	35606.8	33245.3	37677.4	35980.9	34214.3	36620.7	34376.5	39437
190.084	10.9159	C8H14O5	2	(R)-3-((R)-3-Hydroxybutanoyloxy)butanoate	6	39780	neg	24	Carbohydrate Metabolism	Butanoate metabolism	1	1.11985	1.13763	1	1.11691	0.854564	0.163308	0.186029	0.159513	-0.226739	28021.1	30514.7	24921.8	39780.4	27652.1	26027.6	38091.3	25379.8	31472.5	23347.5	18448.9	16952.1	17324.2	25958.6	22334.1	18034	13733.1	18437.3
187.085	10.5599	C8H13NO4	6	6-Acetamido-2-oxohexanoate	6	38232	neg	24	Amino Acid Metabolism	Lysine degradation	1	1.38858	0.859401	1	1.10443	0.944423	0.47361	-0.218597	0.143296	-0.0824949	20408.2	18591.8	21442.4	38232.5	22066.1	23630.4	14847.1	19698.1	17399	5869.83	6920.97	6943.62	7689.6	8539.55	5566.05	6187.71	6584.88	5865.05
138.032	9.94123	C7H6O3	7	4-Hydroxybenzoate	6	37047	neg	24	Metabolism of Cofactors and Vitamins	Ubiquinone biosynthesis__Phenylalanine metabolism__Benzoate degradation via hydroxylation__Bisphenol A degradation__Toluene and xylene degradation__2,4-Dichlorobenzoate degradation__Benzoate degradation via CoA ligation	1	1.01729	0.829152	1	0.983573	0.994915	0.0247359	-0.270292	-0.0238964	-0.00735447	30838.8	27517.9	33440.9	37046.8	24354.9	31983.4	19690	26098.9	30325.3	17041.3	14793.4	18701.6	11868.8	18346.4	19490.9	14798.3	17858.2	17622.7
144.101	20.0381	C5H12N4O	1	4-Guanidinobutanamide	6	32586	pos	24	Amino Acid Metabolism	Arginine and proline metabolism	1	0.890279	0.9384	1	1.43183	0.800964	-0.167671	-0.0917247	0.517856	-0.320191	24508.5	19055.9	32586	23125.1	13768.8	30901.2	24260.5	29240.3	17958.8	11930.5	11017.9	8890.38	13576.8	14007	18003.8	8432.49	6338.39	10730.8
209.069	8.4742	C10H11NO4	3	4-Hydroxyphenylacetylglycine	6	32017	posneg	24	Amino Acid Metabolism	Tyrosine metabolism	1	0.921204	0.848751	1	0.987259	1.15513	-0.118408	-0.236586	-0.0184999	0.20806	26099.3	29087.1	30284.9	25094.5	21624.6	32017.3	20637.2	30965.9	20940.8	9102.94	3857.14	12164.6	7318.09	6308.96	11177.5	12161.1	5900.39	10960.9
117.058	7.84052	C8H7N	2	Indole	6	31635	neg	24	Amino Acid Metabolism	Tryptophan metabolism__Phenylalanine, tyrosine and tryptophan biosynthesis__Benzoxazinone biosynthesis	1	0.892222	0.996302	1	0.727234	1.11983	-0.164526	-0.0053455	-0.459507	0.163285	24867.2	23200.4	22306.1	14256.5	16897.1	31635.4	20211.4	26036.5	23865.5	11679.2	8005.86	10717.2	6830.36	3959.89	11319.3	13368.8	11388.5	9288.16
195.053	8.46796	C9H9NO4	9	Dopaquinone	6	27262	neg	24	Amino Acid Metabolism	Tyrosine metabolism	1	0.964032	0.865877	1	0.883559	0.732917	-0.0528472	-0.207766	-0.178601	-0.448278	23982.1	24201.5	21135.4	23589.2	15974.7	27261.8	18103.9	21551.3	20366.5	13557.7	8051.18	9561.84	9779.06	8229.24	9532.89	6407.79	8779.86	7657.91
112.027	10.639	C4H4N2O2	2	Orotate(Fragment)	6	27003	pos	24	Nucleotide Metabolism	Pyrimidine metabolism	1	0.847816	0.870363	1	1.01201	0.869492	-0.238176	-0.200311	0.0172254	-0.201756	22721	24809.6	24797.6	23919.9	14935.8	22465.3	21060.7	20873.8	21017.2	9129	11842.4	21446.3	12090.9	12894.7	17941.7	13590.3	11982.9	11308.6
171.053	11.4508	C7H9NO4	3	2,3,4,5-Tetrahydrodipicolinate	6	24147	neg	24	Amino Acid Metabolism	Lysine biosynthesis	1	0.791658	0.745894	1	0.887952	0.797098	-0.337051	-0.422958	-0.171447	-0.327172	24146.6	18513.3	22208.5	23409.4	12337.9	15606.2	11448.3	16114.7	20821.9	5320.84	5444	7182.22	5136.67	5643.18	5156.29	5012.73	4700.13	4592.71
133.053	7.6989	C8H7NO	7	Indoxyl	6	23911	pos	24	Amino Acid Metabolism	Tryptophan metabolism	1	0.945512	0.727533	1	0.877119	0.94161	-0.0808327	-0.458916	-0.189155	-0.0867978	23076.6	21668.3	21346.3	23910.6	16852.2	21727.2	13871.7	18047.1	16164.7	5787.96	5188.71	7846.7	4239.75	6290.2	5980.4	5535.26	5903.67	6285.36
364.042	13.5764	C10H13N4O9P	1	Xanthosine 5'-phosphate	6	20439	pos	15	Nucleotide Metabolism	Purine metabolism	1	1.15063	0.689824	NA	NA	NA	0.202427	-0.535699	NA	NA	10351.8	4246.57	17544.5	20438.5	9491.01	7055.17	3317.78	11330	7525.17	0	0	0	0	0	0	0	0	0
829.562	2.97844	C48H80NO8P	24	PC(40:8)	5	24980194	pos	24	Lipids: Glycerophospholipids	Glycerophosphocholines	1	0.913631	0.831937	1	0.900002	1.14015	-0.130316	-0.265454	-0.152	0.189218	22453556	21505912	24980194	23470042	19285070	20230314	17422928	21355012	18575508	43107.7	55730.5	47532.8	20800.1	70487.3	40446.8	34638.5	53214.6	79031.1
833.594	3.05527	C48H84NO8P	29	PC(40:6)	5	20946430	pos	24	Lipids: Glycerophospholipids	Glycerophosphocholines	1	0.822216	0.967441	1	0.722878	0.977114	-0.282411	-0.0477545	-0.468176	-0.0334014	19204014	18323218	20789392	17172190	14968721	15807929	16645475	20946430	18825986	204965	137709	122926	55904.2	185970	94698.4	153225	138892	162827
807.578	3.03744	C46H82NO8P	34	PC(38:5)	5	20724558	pos	24	Lipids: Glycerophospholipids	Glycerophosphocholines	1	0.92965	0.984338	1	0.697102	0.780974	-0.10524	-0.0227743	-0.520557	-0.356653	18336532	17928340	19379426	19049524	16108431	16571765	16257530	20724558	17790708	525941	410346	360107	163974	459021	280725	195845	367309	449296
191.025	12.5869	C6H9NO4S	1	a Cysteine adduct	5	19822070	negpos	24	Medium Contaminant	0	1	1.12216	0.827218	1	1.22497	0.89152	0.166274	-0.27366	0.292749	-0.165661	14053987	13736209	11928524	14255328	10493223	19822070	9432780	11480270	11943002	3117471	3049794	2.72748e+06	3.21881e+06	3.97094e+06	3.70607e+06	2.64552e+06	2.60372e+06	2.6806e+06
805.563	3.02296	C46H80NO8P	31	PC(38:6)	5	19477398	pos	24	Lipids: Glycerophospholipids	Glycerophosphocholines	1	0.871891	0.915364	1	0.672473	1.02207	-0.19778	-0.127583	-0.572453	0.0314988	18088710	18164784	19477398	17789290	15105659	15696330	15472090	18789746	16752198	211904	144172	110850	53796.8	165057	95141.7	175741	145458	156033
282.256	3.2109	C18H34O2	57	[FA (18:1)] 9Z-octadecenoic acid	5	17978926	neg	24	Lipids: Fatty Acyls	Fatty acid biosynthesis__Biosynthesis of unsaturated fatty acids	1	1.09733	0.860198	1	1.08243	0.937454	0.133994	-0.21726	0.11427	-0.0931808	14602809	12945518	13809802	17978926	11575616	15828878	10448619	14634623	10492930	5642358	5367035	4934051	4661877	5.83082e+06	6764914	4.67956e+06	4856495	5410183
158.058	3.60947	C7H10O4	5	Dimethyl citraconate	5	17895828	pos	13	0	0	1	0	0	1	1.70916	0.000525323	NA	NA	0.773287	-10.8945	10687311	0	0	0	0	0	0	0	0	0	12263144	8587021	10261048	17895828	7.47937e+06	0	10953.1	0
197.018	10.1796	C5H11NO3S2	1	CysteineMercaptoethanol disulfide	5	17002236	posneg	24	Amino Acid Metabolism	0	1	1.08999	0.850122	1	1.18194	1.06597	0.12431	-0.234259	0.241154	0.092171	11231201	12154464	11876486	11953970	9479046	17002236	9907484	10869750	9199887	5824739	5.60162e+06	5911927	5416739	7.06313e+06	8.0129e+06	5.89906e+06	5439007	7144071
783.578	3.08347	C44H82NO8P	37	PC(36:3)	5	8425529	pos	24	Lipids: Glycerophospholipids	Glycerophosphocholines	1	1.25062	0.838307	1	0.789315	1.14583	0.322649	-0.25445	-0.341327	0.196399	5224410	5.35635e+06	5.81849e+06	8425529	6418678	5.6651e+06	4.15764e+06	5.00566e+06	4584304	201576	351998	287213	113273	340667	209706	316296	258662	388444
300.099	9.5743	C17H16O5	48	Farrerol	5	8133135	neg	24	Lipids: Polyketides	Flavonoids	1	1.00045	0.910018	1	1.0134	0.914391	0.000642252	-0.136033	0.0192076	-0.129117	7412692	7.75944e+06	6968168	7225466	6791556	8133135	6.23449e+06	7422775	6490812	5.56146e+06	5.23304e+06	5078793	5.09266e+06	5.50848e+06	5484896	4.61747e+06	4.83849e+06	5.05843e+06
781.562	3.02702	C44H80NO8P	52	PC(36:4)	5	8064466	pos	24	Lipids: Glycerophospholipids	Glycerophosphocholines	1	1.37377	0.757994	1	0.722255	1.00065	0.458139	-0.399741	-0.469421	0.000944072	5063229	4668945	5.31926e+06	8064466	6.24414e+06	6.36858e+06	3338875	4138461	3931565	239603	202114	175721	74356.9	227032	144559	218691	178608	220544
351.158	9.07567	C20H21N3O3	2	Phe-Trp	5	7843771	pos	24	Peptide(di-)	Hydrophobic peptide	1	0.969413	0.746071	1	1.16196	1.00353	-0.0448163	-0.422616	0.216559	0.00508482	6261902	7.17281e+06	6.35058e+06	6.56464e+06	4771721	7843771	4714749	5652361	4.39412e+06	3.15662e+06	2.71925e+06	2904001	2.95352e+06	2.98123e+06	4.2671e+06	2.74875e+06	2.90593e+06	3156187
159.126	11.071	C8H17NO2	4	DL-2-Aminooctanoicacid	5	7300556	pos	24	0	0	1	0.948892	0.767621	1	1.13001	1.06845	-0.0756846	-0.381533	0.176339	0.0955261	5.47642e+06	6428928	7.30056e+06	6.05499e+06	5398809	6.77052e+06	5.01921e+06	5.30683e+06	4.41682e+06	2.11869e+06	2.03599e+06	2.01229e+06	1.78653e+06	2.32194e+06	2.86028e+06	2200557	1925862	2.46271e+06
785.594	3.11214	C44H84NO8P	75	PC(36:2)	5	7081047	pos	24	Lipids: Glycerophospholipids	Glycerophosphocholines	1	1.12281	0.792932	1	0.770686	1.10957	0.167115	-0.33473	-0.375785	0.149997	5.36148e+06	5173973	5.4798e+06	7081047	5709935	5191125	3.75666e+06	4.51922e+06	4.42313e+06	468074	436473	411654	174126	505011	335242	559592	415507	485316
143.095	11.5301	C7H13NO2	2	Stachydrine	5	6892552	posneg	24	0	stachydrine degradation	1	0.935046	0.826849	1	0.945124	0.895443	-0.0968904	-0.274304	-0.081425	-0.159327	5.18545e+06	5.63712e+06	6.89255e+06	6.85183e+06	4.95512e+06	4757512	4619253	5240045	4.78843e+06	555362	540492	544659	410653	531790	608044	520219	441881	506885
471.262	7.13911	C45H84O16P2	8	PIP(16:0/20:2(11Z,14Z))	5	6177116	neg	24	Lipids: Glycerophospholipids	Glycerophosphoinositols	1	0.836101	0.718833	1	2.27667	2.04009	-0.258251	-0.476272	1.18692	1.02863	4672514	4842518	6.04985e+06	6.17712e+06	3.41396e+06	3.42274e+06	2.51021e+06	4420432	4257905	77710.5	199849	35609.5	264230	257853	190899	150089	177061	311743
158.131	3.67448	C9H18O2	25	Nonanoic acid	5	6048243	neg	24	Lipids: Fatty Acyls	Fatty Acids and Conjugates	1	0.805984	0.792435	1	0.804289	1.10085	-0.311177	-0.335635	-0.314214	0.138612	6048243	4674305	5656538	4509877	4881804	3.8096e+06	3799726	5.00674e+06	4.1729e+06	4381632	4.11389e+06	2.62242e+06	2523052	3.5348e+06	2.88419e+06	3.62103e+06	3.2873e+06	5330811
334.067	12.715	C9H19O11P	4	sn-glycero-3-Phospho-1-inositol	5	5876907	negpos	15	0	0	1	0.694421	0.991795	NA	NA	NA	-0.526117	-0.0118866	NA	NA	4.60696e+06	4779204	5876907	4326948	3.2118e+06	3.06026e+06	4.89912e+06	5703551	4535170	0	0	0	0	0	0	0	0	0
228.111	12.2212	C10H16N2O4	2	(S)-ATPA	5	4885525	posneg	24	0	0	1	0.690791	0.792229	1	1.20928	1.31102	-0.533679	-0.33601	0.274147	0.390691	4.88552e+06	4123245	4.36549e+06	3.81277e+06	3.04811e+06	2.37794e+06	3.0493e+06	3.69245e+06	3853721	23382.5	20017.6	20466.2	18069.2	27555.8	31607.1	27560	27579	28591.1
496.269	7.13086	C27H36N4O5	2	Ala-Leu-Phe-Phe	5	4747144	neg	24	Peptide(tetra-)	Hydrophobic peptide	1	0.661648	0.761057	1	1.71904	1.45654	-0.595863	-0.393924	0.781604	0.54255	3936177	3.92625e+06	4.74714e+06	4062458	2.3633e+06	1.91735e+06	2.11939e+06	3.49441e+06	3.9828e+06	60699.5	161007	33301.9	183169	138792	116410	100827	124926	145679
72.021	12.6188	C3H4O2	4	Propenoate	5	4610050	neg	24	Lipids: Fatty Acyls	Styrene degradation	1	1.04792	0.814895	1	1.01792	0.930798	0.0675345	-0.295314	0.0256234	-0.10346	3295758	3.52666e+06	2.9662e+06	3.06651e+06	2581172	4610050	2.69419e+06	2894192	2.38832e+06	2.91125e+06	2.59779e+06	2681365	2346334	2782823	3.20801e+06	2333815	2.45087e+06	2.83892e+06
276.096	12.8967	C10H16N2O7	2	GammaGlutamylglutamicacid	5	4335239	posneg	24	Peptide	0	1	0.602141	0.667081	1	1.30796	1.15684	-0.731827	-0.584066	0.387313	0.210193	3.19326e+06	2.39084e+06	4335239	3.02475e+06	1.50756e+06	1.44054e+06	1.43658e+06	2.62541e+06	2.55503e+06	8052.62	11088.4	9491.67	6182.52	10784.8	20483	10739.3	10292.5	12091.7
472.269	7.13994	C45H86O16P2	6	PIP(16:0/20:1(11Z))	5	4330057	neg	24	Lipids: Glycerophospholipids	Glycerophosphoinositols	1	0.787741	0.748029	1	1.51889	1.30879	-0.344207	-0.418833	0.603015	0.388237	2.987e+06	3.91905e+06	4330057	3.94372e+06	2585476	2.32194e+06	1.79947e+06	2.96185e+06	3.64362e+06	73279	209626	42533.5	191687	242493	60124.7	86378.1	185006	154549
191.062	7.13431	C7H13NO3S	1	N-Acetylmethionine	5	4309067	negpos	15	0	0	1	0.723555	0.709411	NA	NA	NA	-0.466825	-0.495307	NA	NA	2887253	2.94539e+06	4309067	3.78488e+06	1977572	1.57565e+06	1.74848e+06	2.93766e+06	2.5085e+06	0	0	0	0	0	263909	0	0	0
270.256	3.21131	C17H34O2	30	[FA (17:0)] heptadecanoic acid	5	4264769	neg	24	Lipids: Fatty Acyls	Fatty Acids and Conjugates	1	1.11431	0.914098	1	1.0554	0.92825	0.156156	-0.129579	0.0777909	-0.107415	3284264	2702666	3.21115e+06	4264769	2901483	3083298	2487429	3.46849e+06	2.45203e+06	1.05584e+06	1169979	889810	897480	1.0165e+06	1.37426e+06	903862	1.0198e+06	968421
193.074	7.15082	C10H11NO3	10	5,6-Dihydroxy-3-methyl-2-oxo-1,2,5,6-tetrahydroquinoline	5	4240766	pos	24	0	3-methylquinoline degradation	1	0.862521	0.865691	1	1.06674	0.835293	-0.213369	-0.208076	0.0932026	-0.259646	3.46376e+06	4.24077e+06	3.87435e+06	3.53325e+06	2.84067e+06	3.6131e+06	3.55155e+06	3339930	3132246	2.98552e+06	3.60332e+06	3023907	2919123	3.30207e+06	4033065	2.5452e+06	2.82077e+06	2.66348e+06
189.119	3.61024	C9H19NOS	2	EPTC	5	4036138	negpos	24	0	0	1	0.646458	0.825117	1	0.286556	1.2036	-0.62937	-0.27733	-1.80311	0.267356	4.03614e+06	3.20851e+06	2.69871e+06	2553607	3.18858e+06	685783	2.32609e+06	3.08778e+06	2.79056e+06	2.10095e+06	1.19302e+06	1.11578e+06	41364	1.19024e+06	32034.9	1.85088e+06	1.2547e+06	2201995
242.225	3.31367	C15H30O2	21	[FA methyl(14:0)] 12-methyl-tetradecanoic acid	5	3996059	neg	24	Lipids: Fatty Acyls	Fatty Acids and Conjugates	1	0.931561	0.841413	1	1.01048	0.942747	-0.102278	-0.249115	0.0150395	-0.0850567	3.78968e+06	2.69202e+06	3.88146e+06	3.99606e+06	2733139	2924717	2.6478e+06	3296851	2.77504e+06	1.92396e+06	1.5263e+06	1.25846e+06	1.32865e+06	1.75424e+06	1.67518e+06	1349050	1.52861e+06	1.56148e+06
495.333	7.10641	C24H50NO7P	8	1-Palmitoylglycerophosphocholine	5	3861232	pos	24	0	0	1	0.862361	0.809884	1	0.553495	0.715519	-0.213636	-0.304212	-0.853357	-0.482939	1.31716e+06	848125	731349	1.21003e+06	449008	838899	541018	913214	891704	81121.9	92853.5	97048.6	38456.7	52662.9	58890.8	42023.1	63249.5	88650
757.563	3.0775	C42H80NO8P	53	PC(34:2)	5	3786685	pos	24	Lipids: Glycerophospholipids	Glycerophosphocholines	1	1.246	0.78111	1	0.717037	1.02898	0.317301	-0.356402	-0.479881	0.0412103	2.42246e+06	2.7596e+06	2.82119e+06	3786685	3.18089e+06	3.00446e+06	1.90919e+06	2.26209e+06	2.08015e+06	321226	281399	222645	104520	281583	205645	303469	242297	303417
261.096	11.7329	C9H15N3O6	4	Ala-Asp-Gly	5	3571452	pos	15	Peptide(tri-)	Acidic peptide	1	0.2918	0.816801	NA	NA	NA	-1.77695	-0.291944	NA	NA	2.33622e+06	3.2771e+06	3.57145e+06	1.13055e+06	900156	649415	2.57667e+06	2.52397e+06	2.40149e+06	0	0	0	0	0	0	0	0	0
80.9645	9.4933	HO3S	1	HSO3-	5	3423151	neg	24	0	sulfate reduction IV (dissimilatory)	1	1.03809	0.923881	1	1.14423	0.905628	0.0539324	-0.114221	0.194381	-0.143009	3030390	2905308	2849097	2.89144e+06	2.80482e+06	3423151	2.47014e+06	2.93891e+06	2707062	1720417	1.90671e+06	1.70455e+06	1.71621e+06	2.07247e+06	2.312e+06	1.59315e+06	1.59902e+06	1.63636e+06
819.578	3.03695	C47H82NO8P	23	PE(42:6)	5	3172067	pos	20	Lipids: Glycerophospholipids	Glycerophosphoethanolamines	1	0.814327	0.879411	1	7.09952	0.736466	-0.29632	-0.185391	2.82772	-0.441308	2.55864e+06	2.43121e+06	3.17207e+06	2.48099e+06	1.95066e+06	2.21482e+06	2052810	2576573	2.54829e+06	0	0	4420.19	5078	16636.3	9666.96	0	3255.32	0
879.578	2.91025	C52H82NO8P	5	PC(44:11)	5	2945782	pos	15	Lipids: Glycerophospholipids	Glycerophosphocholines	1	0.666937	0.920119	NA	NA	NA	-0.584378	-0.120108	NA	NA	2583363	2.30928e+06	2.94578e+06	2.13651e+06	1.49085e+06	1.60037e+06	2.1974e+06	2679148	2.33574e+06	0	0	0	0	0	0	0	0	0
212.008	11.2452	C5H9O7P	3	P-DPD	5	2917744	neg	16	0	0	1	1.04472	0.574955	NA	NA	NA	0.0631174	-0.798478	NA	NA	2.67201e+06	1.6617e+06	2.03233e+06	2.91774e+06	1.94147e+06	1.79153e+06	937780	1.19175e+06	1.53067e+06	0	0	0	0	0	0	0	1735.2	0
320.062	12.0748	C10H16N4O4S2	1	Ovothiol A-cysteine disulfide	5	2862939	posneg	15	0	0	1	0.79091	0.721046	NA	NA	NA	-0.338415	-0.471837	NA	NA	2.86294e+06	1.53703e+06	904722	1.46002e+06	1.77184e+06	963675	1.13082e+06	1.07517e+06	1.61893e+06	0	0	0	0	0	0	0	0	0
133.02	8.20106	C4H7NO2S	1	L-thiazolidine-4-carboxylate	5	2738444	posneg	24	0	0	1	0.948761	0.638119	1	1.14285	0.981335	-0.0758827	-0.648102	0.192637	-0.0271822	1.86199e+06	2223815	2.73844e+06	2.54675e+06	1.20363e+06	2.7242e+06	1187587	1.77977e+06	1.38733e+06	273908	207663	290658	204137	288952	389453	275271	197591	284954
821.593	3.06942	C47H84NO8P	29	PE(42:5)	5	2627119	pos	23	Lipids: Glycerophospholipids	Glycerophosphoethanolamines	1	0.959331	0.999535	1	0.825264	0.890625	-0.0599	-0.000671307	-0.277072	-0.16711	2.3674e+06	2316922	2.53129e+06	2.4367e+06	2.35789e+06	2127576	2113802	2.62712e+06	2471341	16620.9	21977.6	21433.4	8197.84	25903	15441.4	0	9414.28	44051.6
791.547	3.00195	C45H78NO8P	32	PE(40:6)	5	2567193	pos	17	Lipids: Glycerophospholipids	Glycerophosphoethanolamines	1	0.770687	0.935091	NA	NA	NA	-0.375783	-0.0968206	NA	NA	2.41541e+06	2.23947e+06	2567193	2.07034e+06	1.74379e+06	1.75183e+06	2.29602e+06	2.40132e+06	2.05595e+06	0	0	0	3314.92	0	5615.18	0	0	0
793.563	3.03882	C45H80NO8P	41	PE(40:5)	5	2561668	pos	24	Lipids: Glycerophospholipids	Glycerophosphoethanolamines	1	0.893261	0.9522	1	0.922832	1.03512	-0.162847	-0.0706638	-0.11586	0.0497954	2.28245e+06	2.06542e+06	2.44561e+06	2.56167e+06	1.81166e+06	1.69502e+06	1.8682e+06	2264004	2336546	19840	25950	32294.7	9580.23	43382.3	19096.5	25066.1	26768.3	28992.4
759.578	3.16067	C42H82NO8P	45	PC(34:1)	5	2383529	pos	24	Lipids: Glycerophospholipids	Glycerophosphocholines	1	0.879008	0.811475	1	0.659508	0.925501	-0.186051	-0.301381	-0.600539	-0.111693	2.04562e+06	2.01371e+06	2.22366e+06	2383529	1.41914e+06	1.72013e+06	1496241	1.90269e+06	1.69956e+06	701692	492195	465444	191546	527006	375789	507517	402614	625582
246.05	10.9134	C6H15O8P	3	Glycerophosphoglycerol	5	2320490	negpos	15	0	0	1	0.599502	0.902058	NA	NA	NA	-0.738164	-0.148708	NA	NA	1.54908e+06	1.27986e+06	2320490	1.26258e+06	875588	948921	1.40399e+06	2.10719e+06	1.1339e+06	0	0	0	0	0	0	0	0	0
787.609	3.15586	C44H86NO8P	44	PC(36:1)	5	2302260	pos	24	Lipids: Glycerophospholipids	Glycerophosphocholines	1	0.902116	0.892738	1	0.699538	1.1206	-0.148616	-0.163691	-0.515525	0.164267	2.08586e+06	2.1361e+06	2188713	2302260	1.88294e+06	1.59797e+06	1.9261e+06	1.97546e+06	1821496	509994	521329	428706	176868	511368	333110	583212	535302	517588
335.133	12.5457	C12H21N3O8	3	N4-(Acetyl-beta-D-glucosaminyl)asparagine	5	2271337	negpos	24	0	0	1	0.78828	1.05818	1	1.14984	0.837086	-0.34322	0.0815889	0.201436	-0.256553	1.83637e+06	1.70713e+06	2.27134e+06	1.70706e+06	1.61742e+06	1.25923e+06	1.8856e+06	2.03173e+06	2235825	233491	242087	196460	246676	257099	268963	166923	208531	187098
182.071	3.70805	C6H15O4P	2	triethyl phosphate	5	2022333	pos	24	0	0	1	0.964461	1.10944	1	1.33866	1.00215	-0.0522046	0.14983	0.420794	0.00310159	1124520	1.09826e+06	1045153	1.0058e+06	1.19116e+06	954831	1.23753e+06	1.22483e+06	1.16322e+06	1.2445e+06	1216482	1.75157e+06	1.80079e+06	2.02233e+06	1.81606e+06	1.58044e+06	1.43599e+06	1.20518e+06
881.593	2.91694	C52H84NO8P	7	PC(44:10)	5	1981054	pos	17	Lipids: Glycerophospholipids	Glycerophosphocholines	1	0.764567	1.01836	NA	NA	NA	-0.387285	0.0262485	NA	NA	1.68163e+06	1.47764e+06	1.98105e+06	1.38386e+06	1.32457e+06	1.2217e+06	1.58214e+06	1.90559e+06	1746971	0	0	0	3114.95	0	2414.72	0	0	0
521.348	3.74621	C26H52NO7P	12	1-Oleoylglycerophosphocholine	5	1939525	pos	24	0	0	1	0.525936	0.836059	1	0.540993	0.736284	-0.927041	-0.258323	-0.886318	-0.441665	1.93953e+06	1.64718e+06	1.6254e+06	1153043	880646	707545	1.1841e+06	1.35727e+06	1.81626e+06	256450	167644	203067	77991.9	146673	114625	138441	133385	189942
275.112	12.1205	C10H17N3O6	7	Gamma-Glutamylglutamine	5	1878180	posneg	24	Peptide	0	1	1.00111	0.93543	1	1.09143	0.933635	0.00160208	-0.0962989	0.126217	-0.0990696	1.5018e+06	1.76807e+06	1.50706e+06	1.80828e+06	1.09578e+06	1.87818e+06	1.50044e+06	1.51127e+06	1.45677e+06	558035	480656	504982	395631	602289	686889	450489	392522	598217
156.115	3.72204	C9H16O2	28	[FA hydroxy(9:1)] 4-hydroxy-2-nonenal	5	1851434	neg	24	Lipids: Fatty Acyls	Fatty aldehydes	1	0.86118	0.841921	1	0.748462	1.05415	-0.215614	-0.248244	-0.417998	0.0760833	1851434	1.31747e+06	1.4978e+06	1.4396e+06	1.39455e+06	1.18473e+06	1.18456e+06	1443586	1.30085e+06	1.23367e+06	845387	715897	558483	854804	678627	1.0414e+06	735602	1169300
862.557	2.82807	C45H83O13P	20	PI(36:2)	5	1673335	neg	24	Lipids: Glycerophospholipids	Glycerophosphoinositols	1	0.959702	0.945482	1	1.05701	0.945964	-0.0593417	-0.0808773	0.0799844	-0.0801425	1.62262e+06	1.56944e+06	1.66949e+06	1.61951e+06	1673335	1.3728e+06	1.49258e+06	1.57461e+06	1.52932e+06	12961.9	13620.8	8401.84	12616.6	11482.2	12880.1	11803.4	10468.5	10822.2
497.276	7.13911	C22H44NO9P	1	[PS (16:0)] 1-hexadecanoyl-sn-glycero-3-phosphoserine	5	1659412	neg	20	Lipids: Glycerophospholipids	Glycerophosphoserines	1	0.728396	0.732085	1	1.01042	2.3647	-0.457204	-0.449917	0.0149503	1.24166	1359025	1.25311e+06	1.65013e+06	1.65941e+06	792258	652948	601970	1.10146e+06	1.41691e+06	0	79519.1	0	40552.8	39794.6	0	0	182749	5290.04
877.562	2.92063	C52H80NO8P	3	[PC (22:6/22:6)] 1,2-di-(4Z,7Z,10Z,13Z,16Z,19Z-docosahexaenoyl)-sn-glycero-3-phosphocholine	5	1609608	pos	15	Lipids: Glycerophospholipids	Glycerophosphocholines	1	0.709738	1.15702	NA	NA	NA	-0.494641	0.210418	NA	NA	1.37347e+06	1.1754e+06	1.43433e+06	868945	1.00748e+06	950615	1.51167e+06	1.60961e+06	1.48739e+06	0	0	0	0	0	0	0	0	0
273.18	11.3061	C11H23N5O3	1	Val-Arg	5	1599454	pos	24	Peptide(di-)	Basic peptide	1	1.12524	0.798893	1	1.42795	1.30061	0.170237	-0.323925	0.513943	0.379192	1.09431e+06	971000	1.44427e+06	1.59945e+06	1.13219e+06	1.21748e+06	934312	1.03253e+06	836928	56571.9	37898.6	38870.9	47715.7	74008.8	68679.9	49961.3	52472.5	70991.7
223.106	11.1976	C8H17NO6	1	N-acetyl -D- glucosaminitol	5	1543145	neg	24	0	0	1	0.838167	1.2433	1	1.08507	0.970032	-0.25469	0.314173	0.117793	-0.0438962	934185	891603	1.2157e+06	1.02716e+06	750055	772064	972352	1.54315e+06	1.26598e+06	71618.9	69429	57813.9	60968.4	80340	74471.2	60748.7	65175.6	66977.9
79.9662	11.9393	[PO3]3-	1	Phosphite	5	1447483	neg	23	0	0	1	1.0053	0.94588	1	1.98204	1.92605	0.00762964	-0.0802702	0.986989	0.945648	1.13565e+06	1.02903e+06	1.44748e+06	1.44008e+06	1.14813e+06	1.04311e+06	991544	1.18607e+06	1239058	2045.93	2395.82	0	2463.07	4650.62	1690.05	1891.3	4492	2171.74
910.557	2.81397	C49H83O13P	19	PI(40:6)	5	1430446	neg	18	Lipids: Glycerophospholipids	Glycerophosphoinositols	1	0.836094	0.962854	1	2.41206	0	-0.258263	-0.0546113	1.27027	NA	1.43045e+06	1.26482e+06	1415653	1.23011e+06	1.23481e+06	972192	1.16464e+06	1.36906e+06	1.42451e+06	3247.54	0	0	0	5579.59	2253.66	0	0	0
278.224	3.24883	C18H30O2	55	[FA (18:3)] 9Z,12Z,15Z-octadecatrienoic acid	5	1424071	neg	24	Lipids: Fatty Acyls	alpha-Linolenic acid metabolism__Biosynthesis of unsaturated fatty acids	1	0.997357	0.845593	1	1.00607	0.881472	-0.00381783	-0.241965	0.00872914	-0.182014	1.13661e+06	1.23644e+06	1.06502e+06	1.13413e+06	870779	1.42407e+06	945361	1.07237e+06	889481	662328	624382	569819	473402	709378	685016	492016	534291	610169
177.079	4.58209	C10H11NO2	3	5-Hydroxytryptophol	5	1409594	posneg	24	0	0	1	0.697925	0.912391	1	0.761066	0.879957	-0.518856	-0.132275	-0.393907	-0.184495	1.08424e+06	1.07201e+06	1.36966e+06	795726	563702	1.10139e+06	889996	1409594	917412	182898	239672	182433	98108.3	136149	226190	164897	174471	193008
272.235	3.3924	C16H32O3	20	16-hydroxypalmitate	5	1400017	neg	24	0	cutin biosynthesis	1	0.67194	0.818613	1	0.755775	1.0053	-0.573595	-0.288746	-0.403971	0.00762584	1.40002e+06	1.24571e+06	1.00832e+06	882037	938423	634839	889755	1.0795e+06	1.022e+06	656432	601876	361462	327292	452246	444644	555845	471244	601266
204.075	12.3214	C7H12N2O5	4	Glu-Gly	5	1376712	negpos	24	Peptide(di-)	Acidic peptide	1	0.549509	0.731684	1	1.04102	0.508515	-0.863784	-0.450707	0.0580029	-0.975637	1376712	884772	1.32202e+06	947782	535508	485876	553002	965053	1.10394e+06	17613.6	27782.7	22173.3	11741.4	15517	43083.3	14510.8	4908.94	14940.5
228.111	7.16578	C10H16N2O4	2	(S)-ATPA	5	1375779	neg	15	0	0	1	0.375353	0.656941	NA	NA	NA	-1.41368	-0.606164	NA	NA	1.35577e+06	866755	1.37578e+06	535998	414014	400622	548480	1.03114e+06	784247	0	0	0	0	0	0	0	0	0
509.348	3.88658	C25H52NO7P	10	LysoPC(17:0)	5	1367534	pos	24	Lipids: Glycerophospholipids	Glycerophosphocholines	1	0.537826	0.728423	1	1.11993	0.876596	-0.894787	-0.457151	0.163409	-0.190016	1.36753e+06	1.07875e+06	1.12042e+06	718487	584796	614987	736466	813792	1.04781e+06	71224.4	56668.9	39570.8	36194.1	75781.6	75572.6	35196.7	33392.2	78209.6
755.546	3.05019	C42H78NO8P	34	PC(34:3)	5	1367417	pos	24	Lipids: Glycerophospholipids	Glycerophosphocholines	1	1.18238	0.848325	1	0.736976	1.15632	0.241694	-0.237311	-0.44031	0.209538	938932	1.02536e+06	922602	1.36742e+06	1.04439e+06	1.00159e+06	707550	924603	816869	149972	108579	104198	48651.9	120450	98236.7	153566	117352	148537
118.063	7.15135	C5H10O3	13	5-Hydroxypentanoate	5	1364744	neg	24	Lipids: Fatty Acyls	Fatty Acids and Conjugates	1	0.632087	0.71933	1	0.866168	0.904554	-0.661805	-0.475274	-0.20728	-0.144721	1.36474e+06	1.13122e+06	1.14213e+06	804825	769095	725669	715728	909972	991288	419806	478594	405307	276343	535610	317278	431274	383191	364809
298.251	3.285	C18H34O3	63	2-Oxooctadecanoic acid	5	1357303	posneg	24	Lipids: Fatty Acyls	Fatty Acids and Conjugates	1	0.887094	1.00593	1	0.873335	1.10882	-0.17284	0.00853448	-0.195392	0.149028	633938	866505	561172	624396	660729	543723	798419	639638	635790	767780	834685	543627	511224	657752	705282	802918	658747	917970
198.064	8.29102	C8H10N2O4	2	(S)-2-Amino-3-(3-hydroxy-4-oxo-4H-pyridin-1-yl)propanoate	5	1315653	posneg	16	0	0	1	0.692755	0.676	NA	NA	NA	-0.529583	-0.564906	NA	NA	1.1254e+06	1115658	1.31565e+06	1.10977e+06	754388	599769	628292	838766	937275	0	0	0	0	0	1201.61	0	0	0
285.132	11.0883	C12H19N3O5	1	Glycylprolylhydroxyproline	5	1292293	posneg	15	0	0	1	0.81311	0.76328	NA	NA	NA	-0.298478	-0.389715	NA	NA	1.29229e+06	1.15889e+06	1143692	1.29084e+06	886680	745513	714607	802296	1.227e+06	0	0	0	0	0	0	0	0	0
291.095	10.7306	C11H17NO8	3	2,7-Anhydro-alpha-N-acetylneuraminic acid	5	1285361	neg	24	0	0	1	1.01377	0.807824	1	1.06663	0.857626	0.0197267	-0.307887	0.0930546	-0.22158	959349	957106	1.05413e+06	1.03065e+06	695474	1.28536e+06	754582	920804	724324	173925	189244	160689	149216	191032	218512	136431	142148	170695
261.144	13.0303	C9H19N5O4	1	Ser-Arg	5	1282915	pos	20	Peptide(di-)	Basic peptide	1	1.1575	0.90973	1	3.8185	1.01774	0.211012	-0.136489	1.93301	0.0253647	1.05212e+06	857978	808532	1.28292e+06	994553	869350	711214	1012714	749295	0	2488.12	0	1622.14	4284.77	3593.99	0	2532.25	0
853.562	2.92071	C50H80NO8P	9	PC(42:10)	5	1275651	pos	17	Lipids: Glycerophospholipids	Glycerophosphocholines	1	0.839505	1.01695	NA	NA	NA	-0.25239	0.0242496	NA	NA	1.1172e+06	1.0547e+06	1.27231e+06	1.08603e+06	831314	974090	1.06983e+06	1.27565e+06	1.15711e+06	0	0	0	2897.58	0	2279.02	0	0	0
426.088	12.9298	C13H22N4O8S2	2	Asp-Cys-Cys-Ser	5	1244434	posneg	15	Peptide(tetra-)	Acidic peptide	1	0.925161	0.623084	NA	NA	NA	-0.112223	-0.6825	NA	NA	662922	405699	1.24443e+06	1.07499e+06	405156	659802	339120	603829	498280	0	0	0	0	0	0	0	0	0
240.209	3.30468	C15H28O2	32	[FA dimethyl(13:0)] 2,5-dimethyl-2E-tridecenoic acid	5	1226428	neg	24	Lipids: Fatty Acyls	Fatty Acids and Conjugates	1	0.805862	0.723967	1	1.1705	1.01626	-0.311395	-0.466004	0.22713	0.0232749	1.22643e+06	907656	1.20859e+06	1.1125e+06	699870	881366	645721	936397	837867	494346	410247	385034	510798	484527	514189	421174	411744	477683
785.594	7.11538	C44H84NO8P	75	[PC (18:1/18:1)] 1-(9Z-octadecenoyl)-2-(9Z-octadecenoyl)-sn-glycero-3-phosphocholine	5	1218693	pos	24	Lipids: Glycerophospholipids	Glycerophosphocholines	1	1.00389	0.698492	1	2.31376	1.36201	0.00560437	-0.517684	1.21024	0.44574	860093	817756	962026	1.21869e+06	794330	637127	537077	658461	648395	11703.5	28019.1	19089.5	25934.9	39955.9	70186.1	26720	36480.5	16902.1
202.143	16.806	C8H18N4O2	3	NG,NG-Dimethyl-L-arginine	5	1217913	posneg	24	0	0	1	0.939219	0.48614	1	1.73434	1.28173	-0.090466	-1.04056	0.794385	0.358098	930771	737399	1.13949e+06	1.04705e+06	372043	1.21791e+06	347945	612092	404878	137355	123106	135000	175829	183875	326158	154469	145591	206814
198.162	3.4333	C12H22O2	40	[PR] Citronellyl acetate	5	1215680	neg	24	Lipids: Prenols	Isoprenoids	1	0.772861	0.732232	1	1.00266	1.09427	-0.371719	-0.449627	0.00382887	0.12997	1.21568e+06	708125	1.19036e+06	983080	670043	753692	598771	893452	788068	537769	487669	349682	404440	452624	521710	532041	461814	510900
155.095	10.7608	C8H13NO2	4	Retronecine	5	1205312	pos	24	Biosynthesis of Secondary Metabolites	Alkaloid biosynthesis II	1	0.963565	0.829797	1	0.881528	0.806488	-0.0535466	-0.26917	-0.181922	-0.310276	885440	1.03199e+06	1.0645e+06	861592	806373	1.20531e+06	779082	963127	732182	662592	688530	591623	443811	574561	694212	521651	487316	557833
185.105	4.39708	C9H15NO3	5	8-keto-7-aminoperlagonate	5	1184129	pos	24	0	0	1	0.706829	0.73328	1	0.712565	1.05708	-0.500566	-0.447564	-0.488906	0.0800795	1.18413e+06	891870	857375	819427	930389	323579	554217	563399	1.03337e+06	148269	192506	182471	115461	147479	109908	210438	147720	194952
716.584	7.13563	C40H81N2O6P	2	SM(d18:1/17:0)	5	1175114	pos	16	Lipids: Sphingolipids	Phosphosphingolipids	1	0.809224	0.778464	NA	NA	NA	-0.305388	-0.361298	NA	NA	914779	861499	1.17511e+06	1070763	701070	616505	623074	883517	790960	0	0	0	0	0	0	0	10153	0
86.0369	12.585	C4H6O2	7	2-Butenoate	5	1164790	negpos	24	Lipids: Fatty Acyls	Fatty Acids and Conjugates	1	1.06463	0.792217	1	0.994431	0.912907	0.0903482	-0.336032	-0.00805628	-0.131459	757396	807990	764256	758980	556431	1.16479e+06	592624	671885	581075	649376	528339	538811	442277	622583	642108	527793	493681	545556
202.132	7.15895	C9H18N2O3	3	Leu-Ala	5	1136671	pos	24	Peptide(di-)	Hydrophobic peptide	1	0.929865	0.753252	1	1.27582	0.669332	-0.104907	-0.408795	0.351429	-0.579205	981547	1.04068e+06	1.13667e+06	1.11731e+06	846341	973703	757682	830213	791555	30298.4	60839.3	105863	86086.9	64593.3	100658	28487.2	71428.3	31943.3
328.24	3.20358	C22H32O2	11	Docosahexaenoicacid	5	1135221	neg	24	Lipids: Fatty Acyls	Biosynthesis of unsaturated fatty acids	1	1.02973	0.97992	1	0.815819	0.966221	0.0422669	-0.0292636	-0.293679	-0.0495745	922215	959282	912344	967651	774032	1.13522e+06	756214	1085091	896438	307357	393517	304691	206939	268324	345096	273918	317005	380675
198.976	7.0039	C7H5NO2S2	1	pyrimidine-2,6-bis(thiocarboxylate)	5	1129516	neg	24	0	0	1	0.887592	1.65919	1	0.32437	1.05439	-0.172031	0.730482	-1.62429	0.0764084	394979	432436	333008	525814	161754	342415	576135	737420	611812	487156	470778	254337	11329.6	350773	31122	338158	400301	539746
165.065	11.3563	C6H7N5O	5	3-Methylguanine	5	1123783	pos	23	0	0	1	1.3734	0.854115	1	1.8743	1.98894	0.457751	-0.227498	0.906351	0.992001	604436	618308	641643	1.12378e+06	791433	645333	435242	527784	629376	0	3536.19	4806.68	5475.31	5138.95	5022.77	6156.89	3947.38	6489.21
191.095	4.15845	C11H13NO2	1	5-Methoxytryptophol	5	1116362	pos	24	0	0	1	0.588712	0.826723	1	0.862061	0.960405	-0.764366	-0.274524	-0.214138	-0.0582845	913455	831044	1.11636e+06	582848	499341	602034	755229	849906	760005	150904	150595	138364	84654.2	119144	175391	146867	126103	149476
214.193	3.39023	C13H26O2	23	CAI-1	5	1090645	neg	24	0	0	1	0.862953	0.835687	1	0.917418	1.04007	-0.212646	-0.258966	-0.124348	0.0566775	1.06319e+06	679087	1.09064e+06	996207	685178	763291	613747	931971	821714	612371	502336	439190	410731	484805	530038	515404	471102	629651
777.531	3.01583	C44H76NO8P	27	PC(36:6)	5	1053715	pos	19	Lipids: Glycerophospholipids	Glycerophosphocholines	1	0.847551	1.03475	1	4.02531	0	-0.238627	0.0492824	2.0091	NA	774199	917951	894352	772097	717734	702361	816248	1.05371e+06	806420	0	0	10720.9	8181.84	21862.4	13110.6	0	0	0
198.976	4.39283	C7H5NO2S2	1	pyrimidine-2,6-bis(thiocarboxylate)	5	1053116	neg	24	0	0	1	0.44061	1.06064	1	0.423319	1.23712	-1.18243	0.0849365	-1.24018	0.306981	725666	872061	1037673	613222	234447	313514	850835	1053116	891263	402470	428466	359854	10765	479477	13842.5	455789	502286	515070
151.03	9.54584	C4H9NO3S	1	methiin	5	1052500	pos	24	0	0	1	0.964027	0.716062	1	1.08844	1.08456	-0.0528548	-0.481843	0.122265	0.117106	666224	863791	1.0525e+06	815507	812530	861577	564682	746630	537930	653299	608439	615733	602222	628026	813271	756067	576937	703221
231.133	13.2863	C8H17N5O3	1	Gly-Arg	5	1051363	pos	24	Peptide(di-)	Basic peptide	1	1.15658	0.879571	1	1.09402	1.014	0.209861	-0.185128	0.129643	0.0200506	744042	704242	758914	1.05136e+06	738990	762441	528028	776083	637277	5725.01	5679.38	5223.7	5960.64	6256.78	5974.09	3926.52	4407.95	8526.33
864.573	2.87583	C45H85O13P	18	PI(36:1)	5	1026100	neg	24	Lipids: Glycerophospholipids	Glycerophosphoinositols	1	1.27112	1.09361	1	1.06785	0.870624	0.346103	0.1291	0.0947071	-0.199878	816271	533417	788091	1.0261e+06	946938	744339	765712	745440	826746	18895.8	18142.3	17347	15175.2	21064.2	21835.7	19478.9	13041.2	14828.9
179.059	4.61112	C9H9NO3	6	Adrenochrome	5	1023027	pos	24	0	0	1	1.56394	0.936296	1	1.43157	1.0211	0.645181	-0.0949628	0.517603	0.0301274	514505	479208	376108	712106	407178	1.02303e+06	360086	530355	392117	338884	303155	342857	389139	378927	641885	251141	342005	412533
245.163	3.76842	C12H23NO4	4	N-(octanoyl)-L-homoserine	5	1017354	pos	24	0	0	1	0.937269	0.9438	1	1.0239	0.982884	-0.0934651	-0.0834476	0.0340777	-0.0249077	1.01735e+06	752316	920665	833140	802387	886041	965011	879113	695013	759981	741065	673600	578894	863612	784119	627926	777796	731701
743.582	3.16744	C42H82NO7P	18	1-Hexadecanoyl-2-(9Z-octadecenoyl)-sn-glycero-3-phosphonocholine	5	1004243	pos	24	Lipids: Glycerophospholipids	Glycerophosphonocholines	1	0.878899	1.07213	1	0.636234	0.755354	-0.18623	0.100484	-0.652371	-0.404775	665996	720281	930852	765006	580328	691189	900852	1.00424e+06	579177	38485.7	60217.9	44985.6	13689.3	50349	27381.7	34798.6	24406.3	49331.4
210.126	3.76211	C12H18O3	6	(+)-7-Isojasmonic acid	5	989746	pos	24	Lipids: Fatty Acyls	alpha-Linolenic acid metabolism	1	0.901935	0.95781	1	1.14492	0.927412	-0.148905	-0.062189	0.195242	-0.108718	856536	739456	828942	715958	631584	839591	727156	940870	654599	779327	710335	726754	614653	989746	933211	617180	673092	765257
567.332	3.69812	C30H50NO7P	2	[PC (22:6)] 1-(4Z,7Z,10Z,13Z,16Z,19Z-docosahexaenoyl)-sn-glycero-3-phosphocholine	5	955386	pos	16	Lipids: Glycerophospholipids	Glycerophosphocholines	1	0.625986	0.695873	NA	NA	NA	-0.675799	-0.523104	NA	NA	755838	887691	955386	618252	554141	454491	621640	692462	494413	0	0	0	3011.45	0	0	0	0	0
674.536	3.26384	C37H75N2O6P	2	SM(d18:1/14:0)	5	944337	pos	17	Lipids: Sphingolipids	Ceramide phosphocholines (sphingomyelins)	1	1.0324	0.989345	NA	NA	NA	0.0459982	-0.0154542	NA	NA	770175	871097	771069	944337	808595	737562	804457	816662	765518	0	0	0	3019.24	0	4773.87	0	0	0
233.137	12.968	C9H19N3O4	1	Lys-Ser	5	941435	posneg	15	Peptide(di-)	Basic peptide	1	1.1139	0.927974	NA	NA	NA	0.155625	-0.107843	NA	NA	910636	815564	590217	941435	879636	759194	644003	910495	595077	0	0	0	0	0	0	0	0	0
73.0163	12.1292	C2H3NO2	1	Iminoglycine	5	935500	negpos	24	Metabolism of Cofactors and Vitamins	Thiamine metabolism	1	0.666203	0.623325	1	0.932339	0.894318	-0.585967	-0.681944	-0.101073	-0.161141	935500	689503	640861	611885	481558	416080	387853	444818	579698	90806.4	106109	100650	84170.5	91183.5	102077	81158.9	88482.4	96476.2
190.095	10.0045	C7H14N2O4	5	Thr-Ala	5	913585	negpos	15	Peptide(di-)	Polar peptide	1	0.797622	0.670376	NA	NA	NA	-0.326222	-0.576957	NA	NA	860422	608982	868622	913585	507693	443584	372759	630764	563833	0	0	0	0	0	0	0	0	0
228.147	7.1456	C11H20N2O3	3	Leu-Pro	5	898925	pos	24	Peptide(di-)	Hydrophobic peptide	1	0.649037	0.662857	1	1.35265	1.15933	-0.623628	-0.593229	0.435784	0.213297	617337	593100	898924	590882	388868	389304	319155	571426	507625	11507.9	11234.1	15549.5	20276	22500.8	9018.04	18496.1	14421.1	11475.4
302.225	3.21318	C20H30O2	44	[FA (20:5)] 5Z,8Z,11Z,14Z,17Z-eicosapentaenoic acid	5	894217	neg	24	Lipids: Fatty Acyls	Biosynthesis of unsaturated fatty acids	1	0.689173	0.751706	1	0.88242	0.846281	-0.537063	-0.411759	-0.180463	-0.240791	894217	631316	723000	504523	350360	694745	508584	633175	548477	246981	256818	233033	176813	177873	295509	221572	187872	214122
805.563	7.12455	C46H80NO8P	31	[PC (16:0/22:6)] 1-hexadecanoyl-2-(4Z,7Z,10Z,13Z,16Z,19Z-docosahexaenoyl)-sn-glycero-3-phosphocholine	5	876129	pos	17	Lipids: Glycerophospholipids	Glycerophosphocholines	1	0.752551	0.818353	NA	NA	NA	-0.410138	-0.289206	NA	NA	663354	634269	876129	744270	457486	434103	503927	673557	601412	0	0	0	0	1338.03	0	0	1559.12	0
186.162	3.50087	C11H22O2	25	[FA (11:0)] undecanoic acid	5	847894	neg	24	Lipids: Fatty Acyls	Fatty Acids and Conjugates	1	0.868188	0.685741	1	0.757656	1.02363	-0.203921	-0.544265	-0.400385	0.0336922	847894	602869	784818	714807	633901	592197	531734	540554	460742	518218	459476	375004	320899	343398	360584	434854	400502	549304
298.287	3.12504	C19H38O2	25	Nonadecanoicacid	5	842627	negpos	24	Lipids: Fatty Acyls	Fatty Acids and Conjugates	1	1.06221	0.832932	1	0.999221	1.02824	0.0870698	-0.263729	-0.00112453	0.040181	631324	503976	647140	842627	518482	532217	395169	569442	520040	192888	202942	153517	146381	177294	225244	194473	177609	192780
260.148	12.9042	C10H20N4O4	2	Lys-Asn	5	839758	pos	15	Peptide(di-)	Basic peptide	1	0.752828	1.05733	NA	NA	NA	-0.409608	0.0804234	NA	NA	797419	775162	668272	676792	566335	443850	704754	839758	824806	0	0	0	0	0	0	0	0	0
771.577	3.1082	C43H82NO8P	42	PE(38:2)	5	836940	pos	24	Lipids: Glycerophospholipids	Glycerophosphoethanolamines	1	1.2763	0.732025	1	0.577935	0.794717	0.351965	-0.450036	-0.791022	-0.331486	632363	517091	469374	836940	595421	633746	361746	438164	385112	57002.7	69902.9	48702.5	15521.7	55013.9	30954.4	45948	53948.1	39662.6
279.256	3.54188	C18H33NO	1	Linoleamide	5	826998	pos	24	Lipids: Fatty Acyls	Fatty amides	1	0.429364	0.589007	1	0.415338	0.712762	-1.21973	-0.763643	-1.26764	-0.488508	826998	382707	474793	401979	139492	181792	271316	414589	306277	64197.2	96414.5	99945.8	52567.2	28381.1	27271	59595.7	68267	57852.7
851.547	2.94658	C50H78NO8P	2	[PC (20:5/22:6)] 1-(5Z,8Z,11Z,14Z,17Z-eicosapentaenoyl)-2-(4Z,7Z,10Z,13Z,16Z,19Z-docosahexaenoyl)-sn-glycero-3-phosphocholine	5	823523	pos	15	Lipids: Glycerophospholipids	Glycerophosphocholines	1	0.863693	1.04536	NA	NA	NA	-0.21141	0.0639936	NA	NA	706984	614642	797491	706322	535679	588266	651216	823523	740492	0	0	0	0	0	0	0	0	0
268.24	3.23972	C17H32O2	42	omega-Cyclohexylundecanoic acid	5	805988	neg	24	Lipids: Fatty Acyls	Fatty Acids and Conjugates	1	1.03989	0.855177	1	1.20683	1.04533	0.0564348	-0.225705	0.271224	0.0639592	728641	612947	730884	805988	589664	759498	532035	735694	504602	294096	287716	235002	302743	316104	366908	265945	277981	309914
300.267	3.31031	C18H36O3	27	[FA hydroxy(18:0)] 2S-hydroxy-octadecanoic acid	5	787263	neg	24	Lipids: Fatty Acyls	Fatty Acids and Conjugates	1	0.71401	0.887765	1	0.707663	0.871555	-0.485984	-0.17175	-0.498866	-0.198336	658731	787263	488996	492828	499163	389611	463447	611408	642962	357062	420985	274689	175912	313880	255190	292636	278403	346478
161.105	9.69477	C7H15NO3	2	(S)-Carnitine	5	778857	neg	15	0	gamma-butyrobetaine degradation __ carnitine degradation II	1	1.43378	1.05065	NA	NA	NA	0.519828	0.0712791	NA	NA	382462	252953	446869	778857	492557	280347	328875	369834	438390	0	0	0	0	0	0	0	0	0
102.068	4.52497	C5H10O2	9	Pentanoate	5	773016	neg	24	Lipids: Fatty Acyls	Fatty Acids and Conjugates	1	1.04741	0.989131	1	0.852827	1.06937	0.0668259	-0.0157667	-0.229674	0.0967642	715828	539161	633125	739957	604138	633533	535597	748063	583932	699287	483312	469484	413577	467872	527493	500040	510788	755864
523.496	3.09399	C33H65NO3	1	Cer(d16:1/17:0)	5	771855	neg	15	Lipids: Sphingolipids	Ceramides	1	0.879363	1.0549	NA	NA	NA	-0.18547	0.0771057	NA	NA	570951	540110	771855	516418	564295	575054	729998	668967	587322	0	0	0	0	0	0	0	0	0
232.142	7.14974	C10H20N2O4	3	Leu-Thr	5	768776	pos	24	Peptide(di-)	Hydrophobic peptide	1	0.791879	0.870922	1	1.8322	0.693111	-0.336647	-0.199385	0.873578	-0.528841	697331	556477	768776	652671	525271	423700	530458	670794	560260	24879.8	12991.9	55684.8	72096.8	13256.5	86060.9	14173.6	35616.6	15054.8
551.528	3.19621	C35H69NO3	1	Cer(d18:1/17:0)	5	762557	negpos	15	Lipids: Sphingolipids	Ceramides	1	0.949243	1.0158	NA	NA	NA	-0.0751513	0.0226101	NA	NA	598985	718056	762557	724102	666133	583808	760281	726017	626148	0	0	0	0	0	0	0	0	0
288.154	12.9557	C10H20N6O4	2	Asn-Arg	5	740748	pos	24	Peptide(di-)	Basic peptide	1	1.11128	0.895353	1	1.32118	1.26413	0.152228	-0.159472	0.401824	0.33814	585242	485892	455699	740748	473378	482620	402802	500923	463330	5499.1	6939.28	7057.11	6891.73	8736.12	10129.1	4716.11	5225.15	14703.5
172.11	4.29683	C9H16O3	17	9-Oxononanoic acid	5	732085	neg	24	Lipids: Fatty Acyls	alpha-Linolenic acid metabolism	1	0.877849	0.781167	1	0.769553	1.01097	-0.187955	-0.356296	-0.377908	0.0157342	732085	507776	629431	538274	585500	517181	471340	501448	487441	519765	365349	304913	276318	315869	323601	372251	365828	464997
186.1	10.1066	C8H14N2O3	1	Ala-Pro	5	727503	posneg	24	Peptide(di-)	Nonpolar peptide	1	0.968208	0.739665	1	0.893694	1.04741	-0.0466107	-0.435056	-0.162147	0.0668273	608348	536412	590982	727503	519641	433416	341312	467380	475175	13172.4	18388.1	18378.4	11974.8	19088.8	13566.5	16201.7	17440.3	18664.5
835.537	2.80313	C46H78NO10P	12	PS(40:6)	5	723942	neg	15	Lipids: Glycerophospholipids	Glycerophosphoserines	1	0.784466	1.06414	NA	NA	NA	-0.350217	0.0896933	NA	NA	639520	582653	668965	510463	548543	424527	593943	694557	723942	0	0	0	0	0	0	0	0	0
326.319	3.07988	C21H42O2	13	[FA (21:0)] heneicosanoic acid	5	708009	neg	24	Lipids: Fatty Acyls	Fatty Acids and Conjugates	1	0.893046	0.866791	1	1.25379	1.072	-0.163193	-0.206245	0.326301	0.100299	655443	590895	708009	628701	526867	589754	524708	643845	525457	251681	235090	214555	232575	295727	351014	225728	251868	274221
177.079	7.17835	C10H11NO2	3	5-Hydroxytryptophol	5	698268	negpos	24	0	0	1	0.78176	0.946825	1	0.902895	0.667755	-0.355203	-0.0788299	-0.14737	-0.582609	523386	468347	698268	571115	296169	453890	321233	687161	591741	141278	89332.3	96001.7	33243.2	135112	126541	72223.6	66104.3	79769.2
220.069	12.6309	C7H12N2O6	2	Asp-Ser	5	693015	neg	15	Peptide(di-)	Acidic peptide	1	0.468435	0.717433	NA	NA	NA	-1.09408	-0.479084	NA	NA	693015	401992	640412	389179	247164	176589	281874	456833	506340	0	0	0	0	0	0	0	0	0
240.147	8.83939	C12H20N2O3	2	Slaframine	5	684648	pos	24	Biosynthesis of Secondary Metabolites	Alkaloid biosynthesis II	1	0.899208	0.812537	1	0.822019	1.06972	-0.153273	-0.299495	-0.282756	0.0972341	564181	520962	655682	684648	492830	387886	370074	491200	553210	73941.9	85915.8	85841.1	64608.8	58322.1	79038.3	81558.4	101950	79320.7
176.08	10.8321	C6H12N2O4	4	Ala-Ser	5	671506	neg	15	Peptide(di-)	Polar peptide	1	0.939782	0.731348	NA	NA	NA	-0.0896022	-0.45137	NA	NA	614549	410478	515370	671506	407845	368286	285619	440317	400631	0	0	0	0	0	0	0	0	0
245.163	7.27413	C12H23NO4	4	2-Methylbutyroylcarnitine	5	665867	pos	24	0	0	1	0.474591	1.01297	1	0.928699	1.02703	-1.07524	0.0185928	-0.106717	0.0384821	422577	414520	665867	248145	207405	257742	448548	614555	459356	45683.7	37335	51016.6	28803.4	53127.8	42547.2	52728.7	37235.9	47694.1
215.079	10.891	C9H13NO5	1	Succinyl proline	5	664988	posneg	24	0	0	1	0.901349	0.769603	1	1.43515	1.04153	-0.149843	-0.377814	0.521205	0.0586977	611307	521290	544477	664988	450614	396027	340553	461628	488500	10838	12604.8	10536.5	7497.53	23065.2	18202.7	9801.94	11789.5	13798.8
234.162	3.55787	C15H22O2	23	[PR] 1,13-Dihydroxy-herbertene	5	664525	neg	24	Lipids: Prenols	Isoprenoids	1	0.584496	1.19085	1	0.322659	1.06692	-0.774735	0.25199	-1.63192	0.093449	484485	602542	270765	313658	289861	190104	473798	664525	478601	610407	402327	343451	104004	219975	113607	486183	355241	605514
860.542	2.82548	C45H81O13P	19	PI(36:3)	5	657483	neg	19	Lipids: Glycerophospholipids	Glycerophosphoinositols	1	1.15563	0.896601	1	3.33172	1.85358	0.208681	-0.157461	1.73627	0.890317	571332	524191	488030	657483	606163	566355	434995	480870	503950	0	0	3316.55	0	5004.86	6044.96	0	6147.51	0
100.016	7.14512	C4H4O3	1	2-oxobut-3-enanoate	5	653953	neg	24	0	3-methylquinoline degradation	1	0.605879	0.529738	1	1.38068	1.29874	-0.722898	-0.916649	0.465375	0.377114	582168	653953	551953	503196	272492	307669	222909	371210	353093	25906.5	24138.6	27604.9	36997	29987.9	40224.6	25509.3	31259	44079
116.047	4.84838	C5H8O3	9	2-Oxopentanoic acid	5	643676	neg	24	Lipids: Fatty Acyls	Fatty Acids and Conjugates	1	1.05513	0.57233	1	1.01493	1.08926	0.0774225	-0.805081	0.0213844	0.123349	509782	514321	530611	643676	386110	610641	293615	350642	245552	199542	172528	200793	146174	200901	234343	200824	225676	197497
154.03	4.35036	C4H10O4S	1	Diethyl sulfate	5	615218	neg	24	0	0	1	0.5957	0.67613	1	0.631662	1.03964	-0.747341	-0.564627	-0.662775	0.056085	615218	408528	415629	335832	337901	183703	293770	349110	330324	192387	206404	135110	46025.9	237873	53345.6	187621	171201	196243
187.121	10.2291	C9H17NO3	3	(E)-2-Butenyl-4-methyl-threonine	5	609072	pos	24	0	0	1	0.855198	0.872294	1	1.08446	0.956175	-0.225669	-0.197113	0.116976	-0.064653	587639	517731	609072	502455	432553	531180	479503	542319	473677	117770	93076.6	96849.7	84820	118960	129904	96404.3	102476	95330.7
147.089	10.6583	C6H13NO3	2	Fagomine	5	601033	posneg	24	0	0	1	0.962879	0.82168	1	1.09629	1.01545	-0.0545742	-0.283351	0.13263	0.0221167	543102	581663	501715	520204	444865	601033	399478	529964	407004	266802	266543	267061	235779	313503	328195	253701	261910	297159
688.552	7.14086	C38H77N2O6P	3	[SP (18:0/14:0)] N-(octadecanoyl)-tetradecasphing-4-enine-1-phosphoethanolamine	5	599251	pos	15	Lipids: Sphingolipids	Ceramide phosphoethanolamines	1	0.915116	0.935527	NA	NA	NA	-0.127973	-0.096149	NA	NA	508988	407292	493955	599251	384959	306318	378218	489915	451180	0	0	0	0	0	0	0	0	0
519.333	3.80999	C26H50NO7P	3	[PC (18:2)] 1-(9Z,12Z-octadecadienoyl)-sn-glycero-3-phosphocholine	5	592094	pos	15	Lipids: Glycerophospholipids	Glycerophosphocholines	1	0.961106	0.748369	NA	NA	NA	-0.0572321	-0.418178	NA	NA	592094	382145	475911	559699	484319	349730	328532	332508	424207	0	0	0	0	0	0	0	0	0
278.152	9.87118	C16H22O4	7	Alpha-CEHC	5	589893	pos	24	0	0	1	1.0201	1.02062	1	1.00554	1.06985	0.0287064	0.0294525	0.00797282	0.0974018	527462	541308	513441	589893	547973	476143	529344	502440	583059	438173	386332	402254	356895	445562	431100	455946	429638	426858
817.562	3.0114	C47H80NO8P	15	PE(42:7)	5	583261	pos	15	Lipids: Glycerophospholipids	Glycerophosphoethanolamines	1	0.90621	0.948418	NA	NA	NA	-0.142083	-0.0764046	NA	NA	432630	488651	561595	509053	370923	463821	406146	583260	416980	0	0	0	0	0	0	0	0	0
837.552	2.80637	C46H80NO10P	16	PS(40:5)	5	582604	neg	15	Lipids: Glycerophospholipids	Glycerophosphoserines	1	0.779937	1.06118	NA	NA	NA	-0.358571	0.0856702	NA	NA	528426	460869	497227	390956	432761	335675	480722	514142	582604	0	0	0	0	0	0	0	0	0
209.069	4.39789	C10H11NO4	3	N-Benzyloxycarbonylglycine	5	579940	posneg	24	0	0	1	0.957508	0.65115	1	1.18139	0.991187	-0.0626428	-0.618938	0.240487	-0.012771	495278	438480	579940	548380	364321	536679	347354	367258	271034	179343	213668	190528	213515	207491	268382	170712	191724	215959
166.099	3.7526	C10H14O2	21	[PR] Nepetalactone cis-trans-form	5	576467	pos	24	Lipids: Prenols	Isoprenoids	1	1.07658	0.936905	1	1.0798	0.941648	0.106459	-0.0940256	0.110758	-0.0867404	468498	395896	432296	462305	424808	508882	427178	388121	399576	510769	433986	454956	396658	538278	576466	381055	452310	484671
184.11	3.76008	C10H16O3	9	4,5-dihydro-5,5-dimethyl-4-(3-oxobutyl)furan-2(3H)-one	5	552325	pos	24	0	Terpenoid biosynthesis	1	1.17079	1.15431	1	1.17853	1.11724	0.227488	0.207033	0.236989	0.159935	389440	267107	508731	501252	417609	445439	513299	443106	388689	427854	373565	435203	449257	455815	552325	372155	468023	541421
174.101	8.74411	C7H14N2O3	5	Val-Gly	5	548960	posneg	24	Peptide(di-)	Hydrophobic peptide	1	0.609602	0.641527	1	0.932675	0.929169	-0.714061	-0.640418	-0.100553	-0.105987	491296	348399	548960	375863	245819	224845	206597	392974	291289	20029.1	10518.1	19375.6	18713.9	12509	15338.9	19270.1	15727.6	11389.1
218.127	7.89582	C9H18N2O4	5	Leu-Ser	5	547690	posneg	24	Peptide(di-)	Hydrophobic peptide	1	0.7433	0.713515	1	0.665163	0.791695	-0.427983	-0.486984	-0.588221	-0.336983	547690	383283	541760	501717	328022	264944	282306	427605	340905	46736.4	31821	65716.9	33054.5	30818.3	32093.1	38050.2	31345.7	44825.4
266.09	11.9258	C12H14N2O5	1	p-aminobenzoyl glutamate	5	547529	posneg	24	0	0	1	0.52475	0.80052	1	1.0852	0.963349	-0.930299	-0.320991	0.11796	-0.05387	470477	512233	497791	246283	199758	330852	329067	547529	308573	58548.5	57167.6	71330.1	38979.2	69195.4	94807.9	50851.5	53687.1	75652.2
114.079	17.402	C5H10N2O	2	L-proline amide	5	547093	pos	24	0	0	1	0.455831	0.549319	1	1.02032	0.8935	-1.13343	-0.864283	0.0290249	-0.162461	328820	248633	547093	196430	111776	204397	176251	280578	160907	45982.2	38067.6	36563.1	41057.1	32167.5	49839.3	33023.2	33077.3	41667
80.9645	7.14285	HO3S	1	HSO3-	5	546447	neg	24	0	sulfate reduction IV (dissimilatory)	1	0.838162	0.793876	1	0.806843	0.788116	-0.2547	-0.333015	-0.309641	-0.34352	546447	357870	470472	308029	328570	515696	321497	331868	438046	247748	270964	250051	187420	244972	187880	183232	187677	234966
350.062	12.1908	C9H19O12P	1	nonulose 9-phosphate	5	524212	negpos	15	0	0	1	0.926717	0.76712	NA	NA	NA	-0.109799	-0.382476	NA	NA	345325	285959	467732	524212	243256	251009	211232	285989	345857	0	0	0	0	0	0	0	0	0
210.089	3.52152	C11H14O4	4	6-(4-methyl-2-oxopentyl)-4-hydroxy-2-pyrone	5	515596	neg	20	0	0	1	1.28198	0.958789	1	3.7707	0.589349	0.358374	-0.0607142	1.91483	-0.762805	278150	398286	198169	300101	305531	515596	259148	327225	252190	0	0	45563.7	41357.1	62405	68045.2	0	26853	0
162.068	3.9536	C10H10O2	12	Methyl cinnamate	5	508180	neg	15	0	volatile cinnamoic ester biosynthesis	1	1.91351	0.399273	NA	NA	NA	0.936219	-1.32455	NA	NA	172405	123119	205818	508180	264895	186247	53113.2	76228.3	70830.7	0	0	0	0	0	0	0	0	0
314.196	12.3686	C14H26N4O4	1	Lys-Ala-Pro	5	504736	pos	15	Peptide(tri-)	Basic peptide	1	0.529337	0.617396	NA	NA	NA	-0.917742	-0.695731	NA	NA	406842	323822	504736	330496	182693	140755	229719	272375	260638	0	0	0	0	0	0	0	0	0
226.121	3.90619	C12H18O4	5	3,7-Dimethyl-2E,6E-decadien-1,10-dioic acid	5	502158	posneg	24	Lipids: Fatty Acyls	Fatty Acids and Conjugates	1	0.861109	0.734841	1	1.2362	1.16809	-0.215732	-0.444496	0.305913	0.224148	502158	391808	416221	371403	359914	396896	375095	311304	276381	328374	302292	268321	292139	416720	402468	322473	365964	361657
303.154	13.827	C11H21N5O5	1	Glu-Arg	5	501875	posneg	24	Peptide(di-)	Basic peptide	1	0.589578	0.613893	1	1.02753	1.21028	-0.762246	-0.703941	0.0391755	0.275345	279132	278110	501875	229742	109796	284894	159116	314319	176750	33348.5	31060.7	34307.4	24660	31057.7	45716.2	34737.4	36430.2	48307.5
203.127	12.9863	C8H17N3O3	1	Lys-Gly	5	500443	pos	23	Peptide(di-)	Basic peptide	1	1.19311	1.11473	1	1.41942	0.81982	0.254725	0.15669	0.505299	-0.286622	349905	357436	288956	353532	439340	395819	304791	500443	305366	4501.58	5844.67	7273.4	7210.24	7757.87	10041.5	0	8604.08	5840.85
173.048	7.13725	C10H7NO2	4	2-Quinolinecarboxylic acid	5	490220	pos	24	0	0	1	0.759253	0.981673	1	0.916532	1.2377	-0.397348	-0.0266859	-0.125742	0.30766	354481	323883	470965	176375	206037	490220	410782	392935	324549	329429	266900	315942	159883	239803	436440	385992	349946	393178
206.09	10.6024	C7H14N2O5	5	Thr-Ser	5	488243	negpos	15	Peptide(di-)	Polar peptide	1	0.816408	0.702396	NA	NA	NA	-0.292637	-0.509644	NA	NA	420556	302094	438907	488243	251392	208669	192050	343159	280663	0	0	0	0	0	0	0	0	0
275.159	12.518	C10H21N5O4	1	Thr-Arg	5	479690	pos	15	Peptide(di-)	Basic peptide	1	1.07117	0.893036	NA	NA	NA	0.0991917	-0.163209	NA	NA	408122	256047	460070	479690	397626	326939	233487	404591	365907	0	0	0	0	0	0	0	0	0
287.196	10.4936	C12H25N5O3	2	Leu-Arg	5	470718	pos	16	Peptide(di-)	Basic peptide	1	0.920959	0.848938	NA	NA	NA	-0.118792	-0.236269	NA	NA	391363	232234	403473	470718	199079	276091	280052	325740	266126	0	0	0	0	0	1393.97	0	0	0
602.527	2.83837	C39H70O4	1	[GL methyl(15:0/8:0)] 1-(14-methyl-pentadecanoyl)-2-(8-[3]-ladderane-octanyl)-sn-glycerol	5	466522	pos	18	Lipids: Glycerolipids	Diradylglycerols	1	0.909954	0.895362	NA	NA	NA	-0.136134	-0.159458	NA	NA	335855	353415	466522	350681	356004	345034	341855	284270	408727	0	0	0	2492.44	1642.84	4506.55	0	0	0
410.413	2.90238	C27H54O2	4	[FA (27:0)] heptacosanoic acid	5	466256	neg	24	Lipids: Fatty Acyls	Fatty Acids and Conjugates	1	0.930434	0.852221	1	1.17925	1.03744	-0.104025	-0.230701	0.237872	0.0530337	420294	333735	466256	364288	388616	382490	314326	388289	337337	180363	160142	145868	151767	182329	239462	148637	168822	187126
750.595	2.84454	C52H78O3	2	Nonaprenyl-4-hydroxybenzoate	5	463884	neg	15	Metabolism of Cofactors and Vitamins	ubiquinone-9 biosynthesis (prokaryotic) __ ubiquinone-9 biosynthesis (eukaryotic)	1	0.759876	0.939918	NA	NA	NA	-0.396163	-0.0893929	NA	NA	405220	398539	463884	358693	338663	265897	346921	401614	442946	0	0	0	0	0	0	0	0	0
204.111	8.87234	C8H16N2O4	5	Val-Ser	5	463407	negpos	16	Peptide(di-)	Hydrophobic peptide	1	0.581982	0.665666	NA	NA	NA	-0.780953	-0.587131	NA	NA	463407	351828	442839	334256	261406	136515	219186	328592	289679	0	0	0	0	0	4676.74	0	0	0
305.086	7.18283	C10H15N3O8	2	Convicine	5	456193	neg	24	0	0	1	1.01714	1.03519	1	0.956656	0.946353	0.0245166	0.0498985	-0.0639274	-0.0795498	258828	360047	261440	351857	217920	325627	338386	319094	253815	379189	367803	399465	370273	270301	456193	376770	313296	394888
317.175	4.2726	C17H23N3O3	2	Leu-Trp	5	455728	posneg	15	Peptide(di-)	Hydrophobic peptide	1	0.707847	0.781482	NA	NA	NA	-0.498491	-0.355715	NA	NA	455728	283960	403324	397241	215798	196038	269847	286866	336531	0	0	0	0	0	0	0	0	0
341.163	9.01226	C20H23NO4	6	5,8,13,13a-Tetrahydrocolumbamine	5	451984	pos	24	Biosynthesis of Secondary Metabolites	Alkaloid biosynthesis I	1	0.994055	1.04955	1	1.00877	1.13288	-0.00860193	0.0697766	0.0126012	0.18	286488	290028	347408	309129	246163	363141	278293	306090	385326	370874	304415	421575	387860	341703	376924	383085	422121	437414
295.251	3.52663	C18H33NO2	1	[SP (3:0)] sphinga-4E,8E,10E-trienine	5	449983	pos	24	Lipids: Sphingolipids	Sphingoid bases	1	0.380157	0.467427	1	0.36757	0.747026	-1.39533	-1.09719	-1.44391	-0.42077	449983	212020	321014	178618	68224.2	126858	133793	197081	128614	60708.7	75705.9	90815.9	27343.2	33037.8	23142.2	57811.7	34706	77229.4
297.267	3.47461	C18H35NO2	10	[SP (2:0)] sphinga-4E,14Z-dienine	5	448689	pos	24	Lipids: Sphingolipids	Sphingoid bases	1	0.494572	0.677331	1	0.463034	1.23613	-1.01575	-0.562067	-1.11081	0.305831	448689	220808	282559	202541	153903	114416	192638	276570	175650	187596	147282	107846	44649.5	113804	46543.3	208932	127686	210646
266.155	3.18102	C12H26O4S	1	sodium dodecyl sulfate	5	445315	neg	24	0	0	1	0.8887	0.919741	1	0.56691	0.375115	-0.170232	-0.1207	-0.818808	-1.41459	353100	125024	190860	85998.8	355448	153079	119530	139486	356276	445315	221805	160206	92931	261159	114929	105336	63799	141208
256.117	10.0484	C10H16N4O4	2	Thr-His	5	441518	posneg	15	Peptide(di-)	Basic peptide	1	1.10367	0.837472	NA	NA	NA	0.14231	-0.255887	NA	NA	313976	268646	285990	441518	286524	230620	185602	346863	194973	0	0	0	0	0	0	0	0	0
769.562	3.1256	C43H80NO8P	32	PE(38:3)	5	439236	pos	22	Lipids: Glycerophospholipids	Glycerophosphoethanolamines	1	1.09229	0.734217	1	1.14214	1.67997	0.127359	-0.445722	0.191745	0.748437	279754	323294	330906	439236	288360	292554	194334	224098	267292	0	21154	14107.4	6437.31	19274.5	14561.9	0	24043.7	35194.5
226.193	3.34795	C14H26O2	35	(9Z)-Tetradecenoic acid	5	439155	neg	24	Lipids: Fatty Acyls	Fatty Acids and Conjugates	1	0.965193	0.745412	1	1.05685	0.877373	-0.0511108	-0.42389	0.0797677	-0.188738	413437	269783	439155	379551	362515	341242	218211	325880	292541	158768	204299	132172	142783	204107	176503	137370	127052	170087
192.075	11.3031	C6H12N2O5	1	Ser-Ser	5	437717	neg	23	Peptide(di-)	Polar peptide	1	0.817541	0.702724	1	0.5844	0.686609	-0.290637	-0.508971	-0.774972	-0.542439	405178	328966	437717	424592	282984	250468	232608	317141	273745	6823.84	7986.93	3927.04	0	5516.67	5433.71	4869.82	2459.96	5535.77
132.079	4.39194	C6H12O3	15	[FA hydroxy(6:0)] 4-hydroxy-hexanoic acid	5	429655	neg	24	Lipids: Fatty Acyls	Fatty Acids and Conjugates	1	0.649097	0.443015	1	0.925109	1.39426	-0.623495	-1.17457	-0.112304	0.479501	401814	285042	429655	318950	236069	169705	170554	186715	137362	87056.1	99103.6	79117.6	63388.4	131239	50783.3	129977	97458	142431
268.081	10.8042	C10H12N4O5	3	Allopurinolriboside	5	428315	pos	24	0	0	1	1.0466	1.08512	1	1.06984	1.03806	0.0657114	0.117855	0.0973922	0.0538854	267400	270605	378695	376997	275121	307301	266135	428315	300281	65044.5	46254.7	61255.3	47981	65736.3	70887.9	50336.2	53822.2	74962.9
196.146	3.74909	C12H20O2	44	(1S,2R,4S)-(-)-Bornyl acetate	5	425841	pos	24	Lipids: Prenols	Isoprenoids	1	1.05588	0.996466	1	1.17593	1.24399	0.0784449	-0.00510793	0.233803	0.314973	301388	273119	325497	268753	310887	370657	346551	279798	270475	259377	210741	279745	243074	309570	329142	290392	311572	330856
214.157	3.6889	C12H22O3	13	3-Oxododecanoic acid	5	425640	neg	24	Lipids: Fatty Acyls	Fatty Acids and Conjugates	1	0.832456	0.736529	1	0.885225	1.25159	-0.264553	-0.441185	-0.175884	0.323762	425640	200066	313857	318278	228341	235526	226858	256438	208720	215292	146571	138325	105093	177016	160671	214689	191601	219740
216.147	7.16343	C10H20N2O3	1	Val-Val	5	425119	pos	24	Peptide(di-)	Hydrophobic peptide	1	0.816269	0.562526	1	1.0542	1.17689	-0.292884	-0.830009	0.0761444	0.234978	425119	237571	263263	304932	207724	243170	137380	231128	152364	27152.6	8178.75	15701.3	13507.5	10813.1	29477.8	7080.45	22582.3	30396.9
181.002	5.55349	C8H7NS2	1	2-Methylthiobenzothiazole	5	424024	posneg	24	0	0	1	0.655468	0.959227	1	0.360296	1.88134	-0.609404	-0.0600562	-1.47274	0.911762	312712	421012	258142	377559	238373	34203.8	223396	424024	304004	105153	100062	23129.7	7016.63	67198.8	8056.54	141098	75950	212547
186.089	4.32132	C9H14O4	2	7,8-diketopelargonate	5	420720	neg	24	0	0	1	0.852581	0.85122	1	1.00281	1.0872	-0.230091	-0.232396	0.00404141	0.120623	420720	222800	354505	314507	272989	263402	285246	262751	301542	227457	162664	174201	158268	209014	198624	197480	223896	192157
482.168	9.23727	C18H34N4O5S3	2	Ala-Met-Met-Met	5	408543	neg	24	Peptide(tetra-)	Hydrophobic peptide	1	0.846546	0.983548	1	0.984916	1.16153	-0.24034	-0.0239332	-0.0219278	0.216023	321316	307899	408543	327175	315517	235817	305824	342346	372513	90743.4	86398.9	64370.6	66085.3	81676.9	90107.6	91241.6	108671	80610.8
773.592	3.17235	C43H84NO8P	40	PE(38:1)	5	407780	pos	24	Lipids: Glycerophospholipids	Glycerophosphoethanolamines	1	1.0512	0.915337	1	0.759509	1.15095	0.072041	-0.127625	-0.396861	0.202822	407780	303173	281295	405663	327440	309951	345916	314410	247916	52538.6	77962	72608.2	26951.8	78298.8	49012.4	93481.2	87956	52330.4
324.303	3.05338	C21H40O2	7	[FA (3:2/18:0)] 2-propyl-9Z-octadecenoic Acid	5	405370	negpos	24	Lipids: Fatty Acyls	Fatty Acids and Conjugates	1	0.987943	1.01655	1	1.15872	1.02381	-0.0175009	0.0236768	0.212532	0.033943	293686	334180	327548	307083	320098	316713	276105	405370	289748	129074	137916	94887.1	99950.8	142080	177283	104581	137684	128227
305.138	10.8696	C15H19N3O4	1	Thr-Trp	5	397977	pos	15	Peptide(di-)	Hydrophobic peptide	1	0.209841	0.728951	NA	NA	NA	-2.25263	-0.456107	NA	NA	294931	306374	397977	69278.7	80168.7	60242.9	214181	259745	254501	0	0	0	0	0	0	0	0	0
248.054	10.4909	C9H12O8	1	pentane-1,3,4,5-tetracarboxylate	5	396989	pos	24	0	methanofuran biosynthesis	1	0.917667	1.07563	1	1.08761	0.771662	-0.123958	0.105182	0.121167	-0.37396	384016	319587	379974	355939	292378	346045	383826	396989	384714	56038.8	51437.7	48725	45121.2	59603.3	65162.4	34557.9	32350.8	53626
481.353	4.01281	C24H52NO6P	5	[PC (16:2)] 1-hexadecyl-sn-glycero-3-phosphocholine	5	394726	pos	18	Lipids: Glycerophospholipids	Glycerophosphocholines	1	0.707828	0.759208	1	0.848715	0	-0.498529	-0.397433	-0.236647	NA	394726	314424	306188	282250	198088	238347	256030	227914	286909	0	13812.2	4608.6	0	0	15634	0	0	0
170.131	3.59927	C10H18O2	38	(4R,7S)-7-isopropyl-4-methyloxepan-2-one	5	376751	neg	24	0	0	1	0.746103	0.742403	1	0.685884	0.933842	-0.422554	-0.429725	-0.543964	-0.0987498	376751	250326	326260	299674	203487	208127	212611	256669	238482	208534	219029	128986	118489	145671	117568	193395	144877	181457
317.122	11.4407	C12H19N3O7	1	Asp-Pro-Ser	5	376089	posneg	24	Peptide(tri-)	Acidic peptide	1	0.914885	0.656043	1	0.900468	1.49353	-0.128337	-0.608137	-0.151254	0.578728	376088	349316	355511	355028	334296	299590	230538	261397	217193	91884.7	73301.3	61635.3	37662.6	114571	52011.4	123414	76122.9	139227
509.481	3.03286	C32H63NO3	1	N-(Tetradecanoyl)-sphing-4-enine	5	374090	neg	15	Lipids: Sphingolipids	Ceramides	1	0.97239	1.03617	NA	NA	NA	-0.0403929	0.051263	NA	NA	316638	330040	335225	374090	289237	291465	350176	310657	356586	0	0	0	0	0	0	0	0	0
491.234	12.9045	C18H33N7O9	2	Arg-Thr-Thr-Asp	5	370271	pos	15	Peptide(tetra-)	Basic peptide	1	1.32258	0.692449	NA	NA	NA	0.403354	-0.53022	NA	NA	160019	152120	269398	370271	189352	209505	94334.2	179103	129247	0	0	0	0	0	0	0	0	0
162.064	11.0849	C5H10N2O4	1	Gly-Ser	5	369936	neg	15	Peptide(di-)	Polar peptide	1	1.29598	0.949352	NA	NA	NA	0.374046	-0.0749855	NA	NA	249407	180115	239834	369936	292756	204780	175420	264966	195067	0	0	0	0	0	0	0	0	0
290.127	4.3294	C15H18N2O4	2	6-hydroxy-indole-3-acetyl-valine	5	366639	neg	24	0	IAA degradation V	1	1.0451	0.779196	1	0.993117	0.925546	0.0636428	-0.359942	-0.00996511	-0.111624	226387	287328	299325	253031	230040	366639	221677	225803	186038	120569	153737	112739	100956	148357	135068	99244	117516	141469
481.317	3.96516	C23H48NO7P	8	[PC (15:0)] 1-pentadecanoyl-sn-glycero-3-phosphocholine	5	365829	pos	22	Lipids: Glycerophospholipids	Glycerophosphocholines	1	0.613815	0.938315	1	2.52213	2.1591	-0.704123	-0.0918557	1.33464	1.11043	361013	350099	261966	245014	184735	167542	239297	365829	307929	0	12255.2	11030.7	11010.5	39959	7760.76	0	22969.9	27306.7
200.105	4.30079	C10H16O4	9	[FA (10:1/2:0)] 2E-Decenedioic acid	5	364077	neg	24	Lipids: Fatty Acyls	Fatty Acids and Conjugates	1	0.952998	0.743105	1	0.990403	0.973006	-0.0694556	-0.428363	-0.013912	-0.0394793	364077	259394	358083	340478	292372	302567	256546	214860	257991	239206	177387	157365	156597	208208	203645	171108	187183	200173
151.03	11.9159	C8H18N2O6S2	1	PIPES	5	363777	negpos	24	Medium Component	0	1	0.971951	0.82142	1	1.02756	0.870634	-0.0410448	-0.283808	0.0392208	-0.199861	287332	337532	299509	340540	194128	363777	227133	303424	228741	155742	151081	139743	116219	164226	178428	130270	118921	139606
234.085	12.1288	C8H14N2O6	3	Glu-Ser	5	363462	neg	15	Peptide(di-)	Acidic peptide	1	0.650996	0.717509	NA	NA	NA	-0.619279	-0.47893	NA	NA	363462	264772	307093	242419	191265	175211	152988	296968	221150	0	0	0	0	0	0	0	0	0
224.141	3.69785	C13H20O3	6	[FA] Methyl jasmonate	5	360579	pos	24	Lipids: Fatty Acyls	Octadecanoids	1	0.852641	0.928977	1	1.23104	0.87303	-0.229989	-0.106285	0.299876	-0.195898	243321	254875	265594	261484	202654	187101	203929	305875	199740	265859	198674	185458	187478	360579	252106	145350	188724	233387
774.541	2.81932	C42H79O10P	23	PG(36:2)	5	359247	neg	15	Lipids: Glycerophospholipids	Glycerophosphoglycerols	1	0.762206	0.726857	NA	NA	NA	-0.391747	-0.460257	NA	NA	311691	266131	359247	246942	238236	229062	199681	244134	237300	0	0	0	0	0	0	0	0	0
490.173	11.6059	C19H30N4O9S	1	Glu-Met-Asp-Pro	5	358900	pos	15	Peptide(tetra-)	Hydrophobic peptide	1	1.05719	0.988885	NA	NA	NA	0.080233	-0.0161255	NA	NA	289079	358900	241245	352482	321938	265657	295167	260251	323923	0	0	0	0	0	0	0	0	0
787.537	2.81354	C42H78NO10P	20	PS(36:2)	5	351208	negpos	15	Lipids: Glycerophospholipids	Glycerophosphoserines	1	0.86777	0.967216	NA	NA	NA	-0.204616	-0.0480894	NA	NA	330804	306151	351208	290654	322594	244249	277644	346855	331268	0	0	0	0	0	0	0	0	0
143.058	12.6398	C6H9NO3	1	Vinylacetylglycine	5	350920	posneg	24	0	0	1	1.03086	0.782681	1	0.942313	0.872061	0.0438547	-0.353503	-0.085721	-0.197499	299114	304986	330491	346027	266489	350920	243803	266412	221272	152770	128645	106206	98511.9	136035	130715	111754	122344	103932
189.1	9.8748	C8H15NO4	5	(2S)-2-{[1-(R)-Carboxyethyl]amino}pentanoate	5	345891	posneg	24	0	0	1	0.963047	0.988932	1	0.985791	1.08463	-0.0543223	-0.0160563	-0.0206459	0.117204	331568	296834	268309	299289	294614	269672	304346	296848	285593	280371	270299	311336	279339	289598	280821	323025	310186	301747
162.116	4.64369	C10H14N2	4	Nicotine	5	343179	pos	24	Biosynthesis of Secondary Metabolites	Alkaloid biosynthesis II	1	0.479623	1.12664	1	0.21281	1.38533	-1.06003	0.172022	-2.23236	0.470234	225613	312101	80437.5	132526	139916	24038	195992	280540	219899	273204	194832	127351	18188.9	88251	20264.5	343179	159668	321963
215.152	3.71472	C11H21NO3	1	N-Nonanoylglycine	5	341064	pos	24	0	0	1	0.846547	0.862119	1	0.985339	0.883664	-0.240338	-0.214041	-0.0213078	-0.17843	230991	203750	253580	195379	178059	209258	197153	214482	181780	274331	214445	230277	162262	341064	205185	191595	195504	248303
271.153	8.16968	C12H21N3O4	1	Val-Gly-Pro	5	337364	posneg	15	Peptide(tri-)	Hydrophobic peptide	1	0.572948	0.649876	NA	NA	NA	-0.803523	-0.621763	NA	NA	303621	241602	337364	243492	142875	119309	122961	231313	219298	0	0	0	0	0	0	0	0	0
179.095	8.42423	C10H13NO2	5	(-)-Salsolinol	5	336443	pos	24	0	0	1	0.852611	0.824415	1	1.17457	0.984758	-0.23004	-0.278557	0.232132	-0.0221595	336443	180275	233240	281149	189094	169179	159395	227493	231389	35444.7	28399.6	35309.2	29249.7	47292.8	39920.2	29042.5	35003.5	33596.2
218.09	12.1345	C8H14N2O5	3	L-Ala-L-Glu	5	333618	negpos	15	Peptide(di-)	Acidic peptide	1	0.573742	0.752202	NA	NA	NA	-0.801525	-0.410808	NA	NA	271149	302485	333618	191929	189747	138853	200408	222191	259838	0	0	0	0	0	0	0	0	0
408.288	4.33002	C24H40O5	82	Cholate	5	332757	neg	24	Lipids: Sterol lipids	Bile acid biosynthesis	1	1.13572	0.952335	1	1.15238	0.950542	0.183611	-0.0704594	0.204616	-0.0731773	236279	253544	243292	292292	207567	332757	227044	272538	198588	119872	103532	116763	108345	130140	153516	97030.6	84202	142111
169.085	7.68432	C7H11N3O2	5	Nalpha-Methylhistidine	5	326058	pos	24	0	0	1	0.735796	0.878293	1	0.93744	1.33677	-0.442623	-0.187225	-0.0932014	0.418756	239783	202065	326058	237388	139868	187766	200693	247411	226343	12582.9	5367.18	5590.41	7444.24	8560.97	6062.58	9025.16	9648.93	12794.2
245.174	11.3097	C11H23N3O3	1	Lys-Val	5	325098	posneg	15	Peptide(di-)	Basic peptide	1	1.0385	0.729701	NA	NA	NA	0.0544971	-0.454622	NA	NA	240883	180657	286089	325098	167139	242634	98466.9	232139	185752	0	0	0	0	0	0	0	0	0
479.338	3.93042	C24H50NO6P	8	[PC (16:1)] 1-(1Z-hexadecenyl)-sn-glycero-3-phosphocholine	5	324758	pos	20	Lipids: Glycerophospholipids	Glycerophosphocholines	1	0.586309	0.779891	1	0.19928	0.154829	-0.770267	-0.358655	-2.32713	-2.69126	304558	324758	269146	200958	177687	148131	187404	270768	242531	0	29880.2	6596.31	2939.3	0	4329.74	0	5647.6	0
289.139	12.8274	C10H19N5O5	1	Asp-Arg	5	324104	pos	15	Peptide(di-)	Basic peptide	1	0.557654	0.725676	NA	NA	NA	-0.842558	-0.462603	NA	NA	296039	271246	324104	198909	163550	134628	199423	230175	217261	0	0	0	0	0	0	0	0	0
452.46	2.90047	C30H60O2	8	[FA (30:0)] triacontanoic acid	5	319224	neg	24	Lipids: Fatty Acyls	Fatty Acids and Conjugates	1	0.935351	0.952891	1	1.12398	0.969265	-0.0964207	-0.0696167	0.168614	-0.0450372	319224	278812	298266	300152	277984	260222	255263	317478	281337	148135	123337	109379	123968	142185	161916	109883	129841	129422
263.046	11.3653	C9H13NO6S	2	Epinephrinesulfate	5	318846	pos	24	0	0	1	1.1515	0.816245	1	1.03299	1.1094	0.203512	-0.292927	0.046823	0.149782	176034	241053	136025	162151	155910	318846	127433	190268	133773	56739.2	47551.4	43221.3	34564.4	50763	67050.7	51830.4	46185.9	65633.8
283.128	10.4319	C11H17N5O4	2	Ala-Gly-His	5	318827	posneg	24	Peptide(tri-)	Basic peptide	1	0.996086	0.792257	1	1.38004	1.33618	-0.00565755	-0.335959	0.464708	0.418115	284484	188411	206266	318827	170030	187645	141629	233588	162853	8018.62	9170.66	9688.74	10511.9	11711.3	14869.6	10663.4	10932.1	14318.4
242.188	3.41803	C14H26O3	12	[FA oxo(14:0)] 3-oxo-tetradecanoic acid	5	317353	neg	24	Lipids: Fatty Acyls	Fatty Acids and Conjugates	1	0.812908	0.752299	1	0.603553	0.893356	-0.298836	-0.410623	-0.728448	-0.162693	272104	277191	267733	317353	202707	144109	195839	226502	192308	195312	131647	120883	81943.1	120115	68238.1	139638	89314.3	171130
150.054	7.57351	C6H6N4O	1	1-Methylhypoxanthine	5	317186	pos	24	0	0	1	1.05982	0.956017	1	1.03737	0.951204	0.0838141	-0.0648914	0.0529367	-0.0721731	210603	247552	211153	206240	185918	317186	199718	236221	203932	187010	152855	155102	152903	169995	190568	137947	150890	181977
163.084	12.809	C6H13NO4	9	1-deoxynojirimycin	5	315220	pos	24	0	0	1	1.03241	0.782506	1	1.21077	0.931906	0.0460111	-0.353826	0.275923	-0.101744	211459	220676	282086	315220	169869	252279	173349	220270	165264	70200.1	67777.9	66704.4	67643.5	82835.5	97344	60326	72532.2	57886.5
164.032	11.5025	C5H8O6	1	2-Dehydro-D-xylonate	5	313509	neg	24	0	0	1	0.505217	0.798974	1	0.876335	0.68928	-0.985024	-0.323779	-0.190445	-0.536838	313509	261246	313481	158386	111577	178789	174446	262640	272592	11395.9	9706.75	17046.1	7806.61	11424.6	14199.9	8854.27	9119.24	8321.7
310.178	3.40262	C17H26O5	2	[FA methyl,hydroxy,oxo(5:2/8:0)] methyl 8-[2-(2-formyl-vinyl)-3-hydroxy-5-oxo-cyclopentyl]-octanoate	5	311648	neg	24	Lipids: Fatty Acyls	Fatty Acids and Conjugates	1	1.13191	1.04524	1	0.893185	1.0223	0.178759	0.0638397	-0.162969	0.0318198	245565	238098	230237	229174	277989	300908	257763	257190	231247	221565	187572	179431	200725	153477	171499	190666	178761	232267
75.032	7.11308	C2H5NO2	3	Nitroethane	5	310941	neg	24	0	0	1	1.45557	0.760671	1	1.58493	1.17777	0.541585	-0.394656	0.664418	0.236058	85759.4	93765.4	233981	310941	68062.6	222883	134119	106110	74312.7	53409.4	20636.5	35820.5	28941.5	36642.9	108546	25497.4	56780.3	47119.7
466.312	2.82766	C27H46O4S	1	Cholesterolsulfate	5	310310	neg	24	Lipids: Sterol lipids	0	1	0.772619	0.88079	1	0.999651	0.785841	-0.37217	-0.18313	-0.000503551	-0.34769	287502	260799	310310	276537	214285	172557	225529	254531	276196	13328.8	13689	9652.2	12606.3	9170.36	14880.5	9673.83	9716.21	9426.74
264.147	4.2537	C14H20N2O3	2	Phe-Val	5	309759	posneg	24	Peptide(di-)	Hydrophobic peptide	1	1.30107	0.943764	1	0.741046	1.57051	0.379697	-0.0835013	-0.432364	0.651235	202687	150433	205214	309759	187949	228723	124148	211347	191441	9381.45	7678.84	7432.89	4853.57	8459.52	4837.49	12446.6	9883.69	16136.5
146.094	4.2973	C7H14O3	8	ethyl-(2R)-methyl-(3S)-hydroxybutanoate	5	306369	neg	24	0	0	1	0.834411	0.829663	1	0.690721	1.27319	-0.26117	-0.269403	-0.533826	0.348447	306369	203663	239552	179585	261413	184464	236630	165468	219805	187848	129113	119800	92132.9	130684	78862.5	175948	167892	212238
404.165	12.9244	C14H24N6O8	4	Asp-Asp-Arg	5	305992	pos	15	Peptide(tri-)	Basic peptide	1	0.19113	0.591893	NA	NA	NA	-2.38737	-0.756592	NA	NA	299779	187049	305992	90410	35854.8	25267	79025.4	209076	181163	0	0	0	0	0	0	0	0	0
145.02	7.33018	C5H7NO2S	2	3,4-Dehydrothiomorpholine-3-carboxylate	5	305726	pos	24	0	0	1	0.735564	0.858234	1	1.22257	0.853022	-0.443078	-0.220557	0.289921	-0.229346	293487	305726	305201	246683	209161	209410	231010	304510	240680	100519	104248	101204	115275	127814	130984	99645.8	79170.7	82183.5
320.051	12.8768	C8H17O11P	1	octulose 8-phosphate	5	303818	neg	15	0	0	1	0.604526	0.652776	NA	NA	NA	-0.726124	-0.615339	NA	NA	303818	199492	291112	287461	112877	79910.3	125573	155379	237628	0	0	0	0	0	0	0	0	0
187.048	12.2167	C7H9NO5	1	2-(Acetamidomethylene)succinate	5	303257	neg	19	Metabolism of Cofactors and Vitamins	Vitamin B6 metabolism	1	0.87774	0.965229	1	1.16179	1.75663	-0.188134	-0.0510569	0.216346	0.81281	206968	147640	274125	274353	164413	113098	108202	195413	303257	0	0	4707.92	0	0	5469.61	0	4580.42	3689.66
79.9663	13.0132	[PO3]3-	1	Phosphite	5	299704	neg	24	0	0	1	0.952584	0.881985	1	0.906826	0.570373	-0.0700821	-0.181175	-0.141102	-0.810023	264951	205068	160022	299704	161889	138575	129987	197886	227814	8832.7	9232.78	3184.61	7383.01	6098.81	5788.31	2451.35	5918.31	3750.81
247.153	12.5412	C10H21N3O4	1	Lys-Thr	5	294510	pos	15	Peptide(di-)	Basic peptide	1	1.12938	0.797221	NA	NA	NA	0.175528	-0.326948	NA	NA	219265	162773	257290	289220	231776	201047	186466	294510	28710.2	0	0	0	0	0	0	0	0	0
256.106	8.83954	C11H16N2O5	1	1-(beta-D-Ribofuranosyl)-1,4-dihydronicotinamide	5	294194	posneg	24	0	0	1	1.13292	0.702661	1	1.22269	0.863703	0.180041	-0.509099	0.290062	-0.211393	191354	220878	216502	294194	170493	247615	146782	185519	109485	79001.5	78191.2	68572.4	84727.2	91927.1	99387.1	65041.8	49263.6	80688.5
285.169	7.17585	C13H23N3O4	3	Leu-Gly-Pro	5	292590	pos	15	Peptide(tri-)	Hydrophobic peptide	1	0.597256	0.863295	NA	NA	NA	-0.743578	-0.212075	NA	NA	219714	254435	281736	193620	157117	100720	129954	230008	292590	0	0	0	0	0	0	0	0	0
772.526	2.81191	C42H77O10P	18	PG(36:3)	5	291516	neg	15	Lipids: Glycerophospholipids	Glycerophosphoglycerols	1	0.8622	0.707339	NA	NA	NA	-0.213905	-0.499526	NA	NA	287556	244541	291516	234773	230521	244825	163141	221729	197703	0	0	0	0	0	0	0	0	0
202.095	10.8485	C8H14N2O4	5	Proclavaminic acid	5	289013	posneg	24	Biosynthesis of Secondary Metabolites	Clavulanic acid biosynthesis	1	0.936167	0.675769	1	1.81644	1.18163	-0.0951627	-0.565399	0.861111	0.240774	265932	230479	289013	226606	261597	247086	145450	215405	169910	3801.17	4099.46	3785.52	4163.46	8188.46	8875.21	4393.51	6026.89	3388.25
494.507	2.89363	C33H66O2	9	[FA (17:2/16:0)] 1-heptadecyl-hexadecanoate	5	286799	neg	24	Lipids: Fatty Acyls	Fatty esters	1	0.916472	0.821627	1	1.16147	0.944386	-0.125837	-0.283445	0.215951	-0.0825508	286799	237412	260743	220077	218644	280668	216064	219887	208988	115152	100196	97259.3	97244.8	119989	145850	84358.2	103921	106943
137.999	7.80819	C3H6O4S	2	3-sulfopropanal	5	286501	neg	24	0	0	1	0.846062	0.769091	1	1.02942	0.781927	-0.241165	-0.378774	0.0418286	-0.354895	286501	227935	251555	194705	245752	207619	200961	186003	202153	140998	181063	110329	121675	186126	137310	103293	146860	87944.9
306.104	4.04045	C15H18N2O3S	1	indole-3-acetyl-methionine	5	285255	pos	24	0	0	1	0.947685	0.783152	1	1.33677	1.24975	-0.0775208	-0.352635	0.418754	0.321641	202315	251055	285255	230419	194501	275065	202452	244589	131415	111278	61814.6	100755	83367.6	159164	123540	84606.7	132333	125301
296.272	3.20246	C19H36O2	27	[FA methyl(18:0)] 11R,12S-methylene-octadecanoic acid	5	284146	neg	24	Lipids: Fatty Acyls	Fatty Acids and Conjugates	1	1.05026	0.76588	1	0.940717	0.865549	0.0707514	-0.384809	-0.0881672	-0.208313	231181	218672	246610	284146	213783	233540	142441	237919	153047	102397	68719.3	96167.4	81409.1	75138.2	94891.4	84006.9	70909.8	76430.8
145.053	7.1592	C9H7NO	7	3-Methyleneoxindole	5	282281	neg	24	0	0	1	0.978524	0.548532	1	2.10833	1.48471	-0.031321	-0.866352	1.0761	0.570178	122706	282281	174073	203266	176837	186521	64067	192721	60845.1	67252	53568.6	53864.7	99519.6	91035.6	177740	67462.7	87050.6	104843
824.557	2.80781	C46H81O10P	18	PG(40:5)	5	279682	neg	15	Lipids: Glycerophospholipids	Glycerophosphoglycerols	1	0.619932	0.846252	NA	NA	NA	-0.689817	-0.240841	NA	NA	216939	194528	279682	153503	141810	133153	182292	226643	175951	0	0	0	0	0	0	0	0	0
252.111	7.16034	C12H16N2O4	3	Ala-Tyr	5	276271	pos	15	Peptide(di-)	Hydrophobic peptide	1	1.2482	0.985031	NA	NA	NA	0.319852	-0.0217583	NA	NA	165105	135602	208790	276271	195512	164171	134818	212936	154117	0	0	0	0	0	0	0	0	0
122.084	4.76329	C7H10N2	2	2,4-Diaminotoluene	5	271590	pos	24	0	0	1	0.639323	0.969964	1	0.383702	1.52901	-0.645383	-0.0439968	-1.38194	0.6126	218384	248132	183368	152014	196354	67117.3	169594	271590	189180	211738	117647	69614.1	24247.7	91322.6	37526.3	194776	161141	254157
210.162	3.68383	C13H22O2	16	[FA (13:2)] 3E,5E-tridecadienoic acid	5	271449	pos	24	Lipids: Fatty Acyls	Fatty Acids and Conjugates	1	1.1179	0.955369	1	1.85013	1.45988	0.160797	-0.0658694	0.887628	0.545847	204886	166133	193980	188440	218892	224283	160678	178182	200923	95574.9	127607	133987	187348	271449	202012	142040	187892	191490
216.111	10.1703	C9H16N2O4	3	Thr-Pro	5	268770	pos	18	Peptide(di-)	Polar peptide	1	0.95472	0.698643	NA	NA	NA	-0.0668502	-0.517372	NA	NA	247674	148803	243697	268770	188613	153804	124345	166655	156253	0	0	0	3357.96	4129.33	2904.85	0	0	0
258.183	3.08011	C14H26O4	6	Dibutyl adipate	5	267693	pos	19	0	0	1	0	7.69003	1	0.103215	1.11746	NA	2.94299	-3.27628	0.160221	0	57013.4	0	0	0	0	194625	134868	108941	267693	167651	60153.9	15109.9	19501.4	16531.4	226460	151364	175874
338.319	3.01838	C22H42O2	17	[FA (22:0)] 13Z-docosenoic acid	5	266112	neg	24	Lipids: Fatty Acyls	Biosynthesis of unsaturated fatty acids	1	1.64307	0.732154	1	0.900204	0.860262	0.716398	-0.449781	-0.151676	-0.217152	146331	109538	126627	266112	177602	184755	88045.9	88359.1	103641	32458.2	13352	22665.8	17136.6	22019.1	22486.8	16360.7	13044.9	29501.8
354.35	3.00282	C23H46O2	9	[FA (23:0)] tricosanoic acid	5	265255	neg	24	Lipids: Fatty Acyls	Fatty Acids and Conjugates	1	0.806192	0.757193	1	1.0925	0.936407	-0.310805	-0.401267	0.127631	-0.0947925	265255	240949	255346	258607	157749	197600	164499	201216	210926	66830.6	67590.3	55735.9	73927.2	64925.9	68892.8	54640.9	58329.9	65093.3
192.09	7.41074	C10H12N2O2	8	5'-Hydroxycotinine	5	260235	neg	18	0	0	1	1.43679	0.833512	1	10.9442	0	0.522854	-0.262726	3.45209	NA	39321.4	155992	192390	260235	126170	170645	102762	142340	78053.3	0	0	3973.51	28118.1	0	15368.9	0	0	0
181.041	10.5169	C5H11NO4S	1	DL-Methionine sulfone	5	259048	pos	24	0	0	1	1.0405	0.788014	1	1.23446	1.16558	0.0572769	-0.343707	0.303875	0.221053	185091	252579	197656	225030	176977	259048	156170	173809	170666	64711.5	91581.8	47701.4	62912.5	88121.6	100788	67464.9	74139.4	96168.6
125.048	12.9326	C6H7NO2	4	3-Hydroxyaminophenol	5	258992	neg	24	0	0	1	0.809217	0.729101	1	0.962808	0.893567	-0.305401	-0.45581	-0.0546793	-0.162353	258992	212361	246771	206815	173524	200779	120691	204717	198178	50504	60441.1	43292.4	47787.2	45380.3	55333.6	46488.1	47080.7	44252.6
213.01	7.72276	C8H7NO4S	1	Indoxylsulfate	5	257957	neg	24	0	0	1	1.03929	0.794271	1	1.1095	0.947836	0.0556046	-0.332296	0.149915	-0.077291	209422	219496	198990	226280	168344	257957	153754	190130	154846	125554	118153	119942	115195	131857	156419	104515	114738	125427
212.178	3.39069	C13H24O2	21	[FA methyl(12:1)] 2-methyl-2-dodecenoic acid	5	257808	neg	24	Lipids: Fatty Acyls	Fatty Acids and Conjugates	1	0.762835	0.655953	1	1.0512	1.01231	-0.390557	-0.608336	0.0720334	0.0176545	257075	142162	257808	202874	145015	153327	111287	165770	153933	98143.4	105884	81398.5	85240.6	114327	100471	87238.7	75502.5	126199
191.062	8.91548	C7H13NO3S	1	N-Acetylmethionine	5	255501	pos	21	0	0	1	0.937034	1.27604	1	1.91508	0.207876	-0.0938265	0.351672	0.937402	-2.2662	156967	73713.1	255501	170002	161436	124130	187794	237119	195473	16116.5	0	6889.35	14529.3	12423.2	17105.4	0	4782.37	0
246.121	10.5703	C10H18N2O5	6	Glu-Val	5	255246	posneg	24	Peptide(di-)	Hydrophobic peptide	1	0.822632	0.800178	1	1.12668	1.1033	-0.28168	-0.321607	0.172074	0.141821	236157	228697	247413	232444	127488	226002	157157	255246	157537	32626.4	30234	35414.2	23812.4	37695.4	49216.1	33299.7	30698.2	44428.3
202.132	10.137	C9H18N2O3	3	Ile-Ala	5	254865	pos	24	Peptide(di-)	Hydrophobic peptide	1	0.547146	0.91437	1	1.35182	0.963861	-0.870002	-0.129149	0.434899	-0.0531032	162395	214839	254865	120299	116345	109207	159846	204814	213312	21271.8	16062.1	20063.5	17780.2	25795.4	34015.2	15865.7	19964.4	19492.9
247.117	10.519	C9H17N3O5	3	Ala-Ala-Ser	5	252306	pos	17	Peptide(tri-)	Polar peptide	1	0.786067	0.83818	1	0.854625	0	-0.347276	-0.254669	-0.226637	NA	252306	166546	232979	231372	132370	148640	148495	243290	154566	0	0	1364.17	0	0	1165.86	0	0	0
268.079	11.0714	C9H16O9	4	2(alpha-D-Mannosyl)-D-glycerate	5	250108	neg	24	0	mannosylglycerate biosynthesis I __ mannosylglycerate biosynthesis II	1	1.09632	0.870713	1	1.0802	0.817889	0.132675	-0.19973	0.111296	-0.290023	165406	209944	176600	198014	156994	250108	149120	176271	155199	47179.3	50768.9	35886.2	36837.3	50365.6	57364.7	33711.9	32863.5	42886.2
301.164	8.45104	C13H23N3O5	2	Val-Pro-Ser	5	249234	pos	15	Peptide(tri-)	Hydrophobic peptide	1	1.29754	0.518874	NA	NA	NA	0.375781	-0.946543	NA	NA	141853	103762	132021	249234	130927	109836	45855.1	73992	76098.3	0	0	0	0	0	0	0	0	0
375.175	13.2998	C14H25N5O7	7	Thr-Gln-Gln	5	245757	posneg	15	Peptide(tri-)	Polar peptide	1	0.16753	0.446079	NA	NA	NA	-2.57751	-1.16463	NA	NA	172890	126654	245757	57182.7	16676.5	17494.9	43444.2	119552	80251.5	0	0	0	0	0	0	0	0	0
908.541	2.81942	C49H81O13P	11	PI(40:7)	5	235277	neg	15	Lipids: Glycerophospholipids	Glycerophosphoinositols	1	1.03684	0.858456	NA	NA	NA	0.0521969	-0.220184	NA	NA	201586	193945	208258	235277	191980	198777	155002	187248	176077	0	0	0	0	0	0	0	0	0
507.369	3.79781	C26H54NO6P	6	[PC (18:1)] 1-(11Z-octadecenyl)-sn-glycero-3-phosphocholine	5	230791	pos	15	Lipids: Glycerophospholipids	Glycerophosphocholines	1	0.874359	1.11628	NA	NA	NA	-0.193703	0.1587	NA	NA	189591	207416	97144.9	187822	109123	135122	119332	201489	230791	0	0	0	0	0	0	0	0	0
148.048	12.9968	C4H8N2O4	3	O-Carbamoyl-L-serine	5	230652	negpos	15	0	0	1	0.855211	1.01318	NA	NA	NA	-0.225647	0.0188944	NA	NA	164372	125043	230652	148222	207282	89263.2	200976	194330	131617	0	0	0	0	0	0	0	0	0
250.132	7.13351	C13H18N2O3	1	N-Caffeoylputrescine	5	227487	pos	24	0	0	1	1.2061	0.70252	1	1.52117	0.811753	0.270346	-0.50939	0.605177	-0.300887	174359	153026	186521	227487	177101	215233	98206.5	156590	106233	103081	74156.4	123966	134980	167357	155843	62786.5	95962.8	85753.3
408.397	2.89918	C27H52O2	7	[FA trimethyl(24:0)] 2,4,6-trimethyl-2Z-tetracosenoic acid	5	225746	neg	24	Lipids: Fatty Acyls	Fatty Acids and Conjugates	1	0.967114	0.893639	1	1.2284	1.04077	-0.0482419	-0.162236	0.296777	0.0576522	193383	153966	225746	191401	167976	194871	140141	182166	189833	82159.8	75455.1	60840.1	68890.5	88051	111408	66151.8	80868	80341.9
537.38	3.8144	C27H56NO7P	8	[PC acetyl(17:2)] 1-heptadecyl-2-acetyl-sn-glycero-3-phosphocholine	5	224063	pos	15	Lipids: Glycerophospholipids	Glycerophosphocholines	1	0.693222	0.857285	NA	NA	NA	-0.528611	-0.222153	NA	NA	153730	224063	198632	133655	124019	141918	160204	157721	176236	0	0	0	0	0	0	0	0	0
173.117	10.0911	C7H15N3O2	2	&epsilon;-guanidinocaproate	5	223187	pos	24	0	0	1	0.949821	0.854803	1	1.26709	1.22254	-0.074273	-0.226337	0.341515	0.289879	143572	223187	147505	177717	134617	176125	122171	193111	124312	56390.8	52813.3	49513.5	42406.1	74597.6	84105.3	71032.8	45346.3	77659.1
396.397	2.95783	C26H52O2	14	[FA (26:0)] hexacosanoic acid	5	220105	neg	24	Lipids: Fatty Acyls	Fatty Acids and Conjugates	1	0.945526	0.838852	1	1.01834	0.968188	-0.0808114	-0.253511	0.0262199	-0.0466414	213802	164268	220105	201492	208102	155996	154939	180037	166805	56826	61784.2	41110.6	48750.6	51085.3	62814.3	50584.3	49942	54113.4
312.23	3.55616	C18H32O4	45	[FA (18:2)] 9S-hydroperoxy-10E,12Z-octadecadienoic acid	5	216487	neg	23	Lipids: Fatty Acyls	Linoleic acid metabolism	1	1.00467	1.03333	1	1.35541	1.09211	0.00672396	0.0472943	0.438728	0.127122	136755	129496	193518	134018	111412	216487	158618	179084	137390	38669.3	56248.8	58066.4	65792.5	75470.5	66093.5	0	67265.4	99810.8
154.049	7.81156	C5H6N4O2	1	6,8-dihydroxypurine	5	214535	negpos	24	Nucleotide Metabolism	purine degradation II (anaerobic) __ purine degradation III (anaerobic)	1	0.739136	0.843095	1	0.835501	0.871751	-0.436089	-0.246233	-0.259287	-0.198011	176716	159820	210658	96956.2	92959.3	214535	145062	169071	147204	65794.1	65305.9	63836.6	31144.8	49268.8	82456.1	53398	60022	56516.3
308.158	12.9672	C12H24N2O7	2	Fructoselysine	5	211684	pos	23	0	fructoselysine and psicoselysine degradation	1	0.671217	0.773382	1	2.96676	1.55978	-0.575148	-0.370746	1.56889	0.641347	201572	125968	211684	102437	96495.1	163005	96729.6	186645	133653	5098.13	0	5539.35	9164.5	10857.9	11536.4	3390.09	8334.02	4868.06
149.069	12.7672	C5H11NO4	2	4-amino-4-deoxy-L-arabinose	5	209486	pos	24	0	0	1	0.742827	0.935858	1	1.05863	1.3622	-0.428901	-0.0956384	0.0821941	0.445942	164863	209486	167682	160429	98637.6	143569	171372	188228	147664	26625.2	26799.9	24167.4	21731.6	28121.9	32288.1	43793.3	22933.1	38970.5
274.164	12.6506	C11H22N4O4	2	Lys-Ala-Gly	5	209428	pos	16	Peptide(tri-)	Basic peptide	1	1.67163	1.46455	NA	NA	NA	0.741258	0.550462	NA	NA	131251	100947	87046.9	158855	184228	190578	171752	209428	86371.1	0	0	0	0	0	0	11337.3	0	0
382.381	2.94663	C25H50O2	9	[FA (25:0)] pentacosanoic acid	5	207498	neg	24	Lipids: Fatty Acyls	Fatty Acids and Conjugates	1	0.73467	0.787925	1	1.13239	1.00089	-0.444832	-0.343871	0.179373	0.0012821	207498	147795	205606	145746	127181	139149	137555	135105	169287	68703.8	68966.9	62892	61222.6	67891.9	98001	64729.8	62478.9	73532.4
297.09	12.7467	C11H15N5O3S	2	5'-methylthioformycin	5	206979	pos	20	0	0	1	0.544769	0.943495	1	0.569852	1.41884	-0.876283	-0.0839136	-0.811341	0.504716	164043	172367	206781	112842	82396.1	100675	158970	206979	146549	0	4609.39	0	1665.41	961.261	0	0	1666.53	4873.48
228.148	8.95642	C11H20N2O3	3	L-isoleucyl-L-proline	5	205982	pos	24	0	0	1	1.12774	0.88749	1	1.0758	1.20351	0.173439	-0.172197	0.105404	0.267253	144057	146607	186348	205982	138232	193734	141241	152947	129156	77403.1	62996.9	69160.1	63623.3	68125.9	93694.7	65883.6	71085.7	115239
243.158	12.8627	C11H21N3O3	1	Lys-Pro	5	205393	pos	15	Peptide(di-)	Basic peptide	1	1.00289	0.799655	NA	NA	NA	0.00415922	-0.32255	NA	NA	193256	143981	166968	205393	187782	112486	122317	147955	132918	0	0	0	0	0	0	0	0	0
224.153	3.94901	C12H20N2O2	1	Aspergillic acid	5	202962	pos	24	0	0	1	0.451198	0.986876	1	0.279296	1.056	-1.14817	-0.0190595	-1.84013	0.0786102	154950	157404	158192	93882.5	60554.6	57872.6	156329	157045	150996	194190	137268	185459	9191.33	126059	9122.9	152910	189992	202962
203.091	11.5896	C7H13N3O4	3	Ala-Asn	5	198301	neg	24	Peptide(di-)	Polar peptide	1	0.939717	1.00504	1	0.757147	0.759066	-0.0897021	0.00725771	-0.401354	-0.397703	175364	144666	162218	183543	142764	126869	125425	198301	160955	5021.15	7138.56	5462.34	2657.19	5207.32	5477.97	4126.95	4751.89	4497.44
235.121	4.29368	C13H17NO3	1	Lophophorine	5	194671	pos	24	0	0	1	1.09879	0.417204	1	0.862562	0.824274	0.135911	-1.26118	-0.2133	-0.278803	154396	94505.1	95748.9	194671	83934.5	100091	38995.5	51102.7	53690.9	45855.4	20973.7	21812.5	16219.3	33804.4	26435.2	24862.4	24722.8	23479.7
310.23	2.95468	C22H30O	3	14'-apo-beta-Carotenal	5	193496	neg	19	0	0	1	0.968035	1.00321	1	2.03509	1.79027	-0.0468693	0.00462531	1.02509	0.840176	193496	151278	180765	164059	174884	169797	174483	163949	188795	0	2027.43	0	0	4126.01	0	0	1875.98	1753.68
313.095	4.36534	C17H15NO5	1	Melicopine	5	193338	pos	24	0	0	1	1.41592	0.911524	1	1.20714	1.01351	0.501745	-0.133647	0.271594	0.019362	103382	135186	103249	193338	126515	164134	81688.5	128021	101865	98680.8	85994.3	91631.1	100076	143231	90233.3	74091	92957.3	112991
202.059	12.1549	C7H10N2O5	1	N3-fumaramoyl-L-2,3-diaminopropanoate	5	190410	neg	24	0	0	1	0.953041	0.829733	1	0.94497	0.753375	-0.0693895	-0.26928	-0.0816597	-0.40856	144636	111224	130119	110341	67102.5	190410	90426.9	142398	87433.8	18118.5	16278.4	15433.4	7245.33	16451.5	23391.3	10396.5	13756.9	13387.5
563.528	3.07702	C36H69NO3	5	[SP (18:0)] N-(9Z-octadecenoyl)-sphing-4-enine	5	188555	neg	15	Lipids: Sphingolipids	Ceramides	1	0.865751	0.934844	NA	NA	NA	-0.207975	-0.097203	NA	NA	188555	91487.5	161133	108505	134668	138776	141127	126722	144581	0	0	0	0	0	0	0	0	0
822.541	2.8148	C46H79O10P	16	PG(40:6)	5	187969	neg	15	Lipids: Glycerophospholipids	Glycerophosphoglycerols	1	0.688797	0.761858	NA	NA	NA	-0.53785	-0.392405	NA	NA	143297	130990	187969	105049	105473	107878	99704.4	146565	105904	0	0	0	0	0	0	0	0	0
157.11	9.714	C8H15NO2	2	Homostachydrine	5	187909	neg	24	0	0	1	0.854544	0.731035	1	1.21403	1.06606	-0.226773	-0.451987	0.279805	0.0922837	65915.8	94610.9	187909	110134	84212.9	103406	77029.8	99551.3	78137.4	39819.7	34503.8	27153.8	43606.1	45232	34358.5	25302	39680.4	43198.2
260.137	9.94251	C11H20N2O5	4	Glu-Leu	5	186213	posneg	24	Peptide(di-)	Hydrophobic peptide	1	0.63709	0.690945	1	0.69269	0.898679	-0.650432	-0.533357	-0.529718	-0.154123	168168	157202	186213	127936	81430.4	116558	76904.8	128869	147702	34305.8	58376.1	25481.6	19774.4	25305.6	36770.7	29391.8	40376	36423.2
383.137	9.73451	C21H21NO6	5	(+)-Adlumine	5	185097	neg	24	0	0	1	1.23454	0.842683	1	1.17661	0.779773	0.303978	-0.246937	0.234634	-0.358874	89133	121269	91003.8	106472	80528.9	185097	61649.1	106410	85930.2	33592.3	39949.7	23636.6	29059.7	45803.8	39477.7	35353.4	21057.5	19366.3
321.18	10.123	C15H23N5O3	1	Phe-Arg	5	183337	pos	15	Peptide(di-)	Basic peptide	1	0.976631	0.705194	NA	NA	NA	-0.0341143	-0.503908	NA	NA	126149	97010.2	163275	183337	83518.8	110548	72094.2	119956	80461.5	0	0	0	0	0	0	0	0	0
884.542	2.83209	C47H81O13P	29	PI(38:5)	5	179226	neg	24	Lipids: Glycerophospholipids	Glycerophosphoinositols	1	1.18294	0.824715	1	1.32488	0.878778	0.242376	-0.278032	0.405862	-0.186429	146859	134126	124050	179226	168932	130974	105047	101210	127782	13361.2	12180	10785.3	11746.4	16406.5	19975.5	9456.07	11169.1	11297.8
463.228	12.8775	C18H33N5O9	2	Asp-Lys-Thr-Thr	5	178819	pos	15	Peptide(tetra-)	Basic peptide	1	0.900851	0.783001	NA	NA	NA	-0.15064	-0.352915	NA	NA	99012	149543	178819	174053	102589	108359	89495	132697	112443	0	0	0	0	0	0	0	0	0
188.141	3.5719	C10H20O3	15	[FA hydroxy(10:0)] 2-hydroxy-decanoic acid	5	172475	neg	23	Lipids: Fatty Acyls	Fatty Acids and Conjugates	1	0.768423	0.609795	1	0.772839	0.79394	-0.380027	-0.713604	-0.37176	-0.332897	162842	172475	169303	154640	135422	97699.1	81238.6	125480	100996	68789.9	53206.5	39049	31152.8	50393.3	42916.1	0	56132.5	71727.9
238.157	3.3439	C14H22O3	4	[FA oxo(5:1/5:0/4:0)] (1R,2R)-3-oxo-2-(2'Z-pentenyl)-cyclopentanebutanoic acid	5	168042	neg	20	Lipids: Fatty Acyls	Octadecanoids	1	1.78419	0.668097	1	4.85736	1.70486	0.83527	-0.58187	2.28017	0.769655	69943.7	77632.2	67568.7	168042	99464.6	116353	37457.4	51113.7	55166.3	0	0	18491.8	24565.2	31060.5	34195.7	0	31526	0
536.553	2.96113	C36H72O2	10	[FA (36:0)] hexatriacontanoic acid	5	167997	neg	24	Lipids: Fatty Acyls	Fatty Acids and Conjugates	1	1.00549	1.10595	1	1.36728	1.01562	0.00789348	0.145283	0.451312	0.0223602	134331	135031	130877	120424	126316	155695	139883	134764	167997	62956	63423.1	50685	64547.8	70082.6	107466	55280.9	68177.4	56371.6
230.142	8.19893	C14H18N2O	1	Camoensine	5	165252	neg	24	0	0	1	0.979722	0.81518	1	1.02589	0.896676	-0.0295551	-0.29481	0.036879	-0.157341	127503	119629	132739	111247	95669.1	165252	96107.3	116423	97132.9	48675.9	53753.1	51931.3	37679.1	54377.1	66300.8	46383.5	44187	47840.6
316.298	3.56408	C19H40O3	2	1-O-Hexadecyl-sn-glycerol	5	164657	neg	15	0	0	1	1.09019	1.00823	NA	NA	NA	0.124585	0.0118226	NA	NA	102594	138357	102485	164657	118982	90772.8	90154.9	140121	115986	0	0	0	0	0	0	0	0	0
301.127	12.7212	C12H19N3O6	2	Ala-Asp-Pro	5	164323	pos	24	Peptide(tri-)	Acidic peptide	1	1.14483	0.845301	1	1.35088	1.23557	0.195138	-0.242462	0.433899	0.305178	87871.3	106419	87829.6	93703.4	64953.6	164323	81660.9	90004	66811	21806	20983.3	22127.2	28429.5	27936.3	31328.6	22217.6	26152.2	31839.1
245.137	8.86766	C10H19N3O4	6	Leu-Asn	5	159483	posneg	21	Peptide(di-)	Hydrophobic peptide	1	0.678622	0.792758	1	1.14074	0.148421	-0.559319	-0.335048	0.18997	-2.75223	159483	124114	157832	146925	101238	51400.8	97734.3	136540	115673	10931.8	0	10172.4	7261.47	7508.15	9304.74	0	3132.3	0
424.428	2.90763	C28H56O2	8	[FA (28:0)] octacosanoic acid	5	157012	neg	24	Lipids: Fatty Acyls	Fatty Acids and Conjugates	1	0.814871	0.791104	1	1.1071	0.895254	-0.295357	-0.338061	0.14678	-0.159631	157012	108113	129986	100685	119355	101924	82706.5	122775	107093	59801.2	52755.7	44410.2	43661.7	58644.8	71471	46165.7	45495.5	48864.2
248.101	11.8911	C9H16N2O6	1	Glu-Thr	5	155562	negpos	24	Peptide(di-)	Acidic peptide	1	0.675186	0.794917	1	0.872248	1.0413	-0.566644	-0.331124	-0.19719	0.058391	133363	109776	155562	81364.8	77703.2	110129	97074.1	102907	116953	20896.7	20796	16639.8	9741.58	15409.2	25729.6	19530.4	16631.9	24579.5
252.078	9.02214	C16H12O3	6	4'-O-Methylisoflavone	5	154336	pos	22	0	0	1	0.567032	0.796618	1	0.846232	1.00424	-0.818497	-0.32804	-0.240875	0.00610955	154336	135453	100090	66714.5	61649.6	92709.6	118996	102305	89283.7	43455.4	55764.7	62190.1	28652.9	49980.7	57957	52795.6	41367.3	67932.4
278.094	10.3036	C10H18N2O5S	1	Glu-Met	5	154239	posneg	24	Peptide(di-)	Hydrophobic peptide	1	0.903997	0.759096	1	1.20245	1.22769	-0.14561	-0.397646	0.265972	0.29595	115138	134725	154239	137134	75009.1	153164	86697.5	135873	84182.3	22527.6	25564.8	23698.1	21683.3	27428.5	37212.4	29251.7	25084.2	33800.8
382.105	6.19495	C21H18O7	13	Austrobailignan 1	5	153805	neg	24	0	0	1	0.672234	0.924297	1	1.13823	0.885878	-0.572964	-0.113571	0.186797	-0.17482	153805	135285	81818.6	71534	129978	47826.1	134596	117808	90425.9	81523.3	103915	69150.1	59097.1	123819	106865	68211.6	75288.5	82034
83.9615	12.3159	HO3Cl	1	Chlorate	5	153418	neg	24	0	0	1	0.777227	0.713315	1	1.60103	1.13435	-0.363592	-0.487389	0.678999	0.181867	51661	132476	153418	92562	41833.5	127962	58917.6	75487.8	106378	34295.6	33340.1	65709	75971.3	67788.2	69729.3	68953	39302.4	43004.4
312.097	12.9716	C14H12N6O3	1	Pteroic acid	5	151085	pos	21	0	0	1	0.76656	0.935948	1	2.86121	1.61378	-0.383529	-0.0954998	1.51662	0.690443	76819.4	85339.4	151085	86179.6	72247.8	81693.1	81270.3	134165	77744.7	0	0	5108.53	3875.07	4537.89	6203.62	0	4298.59	3945.45
578.6	3.03366	C39H78O2	2	[FA (16:2/23:0)] 1-hexadecyl-tricosanoate	5	150659	neg	24	Lipids: Fatty Acyls	Fatty esters	1	0.819912	0.822406	1	1.3785	0.973199	-0.286458	-0.282077	0.463099	-0.0391939	130117	95640.8	150659	71695.2	91969.1	144964	99414.6	109728	100425	48291	43540.8	35507.4	45706.6	50592.2	79238.3	36315.6	46686.7	40924
247.142	9.84931	C11H21NO5	1	Hydroxybutyrylcarnitine	5	150124	pos	24	0	0	1	0.748917	0.633136	1	1.07437	0.874469	-0.417123	-0.659412	0.103486	-0.193521	126006	145562	150124	114207	79248.3	122357	79369.2	87926	99693.7	47520.4	42625.6	45018.9	31129.2	59303.9	54783.6	31993.8	40432.5	45771.3
278.072	8.58435	C13H14N2O3S	1	5-hydroxyindole thiazolidine carboxylate	5	149911	posneg	21	0	0	1	2.69992	0.68718	1	2.71039	0.46421	1.43292	-0.541241	1.4385	-1.10715	29995.9	29865	36418.7	149911	83125.5	26911.4	15490.9	36297.5	14372.9	4781.94	0	5763.63	11657.3	12542.7	4382.52	4895.36	0	0
173.048	4.76135	C10H7NO2	4	4-Quinolinecarboxylic acid	5	149623	pos	24	0	0	1	1.03511	0.822596	1	0.839473	1.01634	0.0497778	-0.281744	-0.252445	0.0233859	80357.9	86547.9	92509	73991.9	44906.3	149623	61292.7	90290.7	61810.2	55848.5	53846.6	60658	29414.5	40508.5	73083.7	48176.1	50340.5	74620.4
450.444	2.88898	C30H58O2	9	[FA (30:0)] 21Z-triacontenoic acid	5	145692	neg	24	Lipids: Fatty Acyls	Fatty Acids and Conjugates	1	0.955889	0.831143	1	1.30034	1.09475	-0.0650853	-0.266832	0.378884	0.130598	134770	119955	145692	144933	101010	136810	113946	111533	107324	48471.6	52864.5	49608.5	53088.2	66306.1	76884.3	58128.3	47286.4	59831.4
318.154	13.4209	C12H22N4O6	6	Lys-Asp-Gly	5	144262	posneg	15	Peptide(tri-)	Basic peptide	1	0.574632	0.61318	NA	NA	NA	-0.799289	-0.705616	NA	NA	90640.9	54240.6	144262	101183	32696	32272.3	37852	78533.9	60911.1	0	0	0	0	0	0	0	0	0
304.102	12.6337	C10H16N4O7	3	Asn-Asp-Gly	5	143476	neg	15	Peptide(tri-)	Acidic peptide	1	0.745644	0.635883	NA	NA	NA	-0.423441	-0.653166	NA	NA	133923	103790	143476	116992	76964.2	90275	61097.9	103252	78041.9	0	0	0	0	0	0	0	0	0
219.086	11.4225	C7H13N3O5	3	Asn-Ser	5	142842	neg	15	Peptide(di-)	Polar peptide	1	0.701943	0.722774	NA	NA	NA	-0.510575	-0.468384	NA	NA	126851	99408.4	142842	109800	81361.8	67926.7	71071.5	93672.2	102033	0	0	0	0	0	0	0	0	0
106.027	12.7608	C3H6O4	2	L-Glycericacid	5	138709	neg	24	0	0	1	0.942479	0.669729	1	0.933868	0.902419	-0.0854683	-0.578351	-0.0987095	-0.14813	118803	122008	115136	138709	85582.8	111181	72063.3	82734	83590.6	51412.9	48369.2	44339.3	41615.2	42177.9	50797.2	48436.8	44084.8	37536.2
283.164	12.6825	C12H21N5O3	1	Lys-His	5	138034	pos	16	Peptide(di-)	Basic peptide	1	0.910226	1.51226	NA	NA	NA	-0.135703	0.596705	NA	NA	76407.4	46122.5	112205	55981.4	76406.8	81273.4	116895	138034	100050	0	0	0	2578.4	0	0	0	0	0
100.053	12.7127	C5H8O2	18	Tiglic acid	5	136820	neg	24	Lipids: Fatty Acyls	Fatty Acids and Conjugates	1	0.967692	0.885602	1	0.980907	0.913172	-0.0473801	-0.175269	-0.0278115	-0.131042	116508	136820	101084	98648.5	113468	130844	89349.4	92428.7	132089	107000	83066.3	77969.8	62512.9	92120	108285	94911.2	73649.7	76202
420.264	2.99117	C21H41O6P	2	CPA(18:0/0:0)	5	135476	neg	21	0	0	1	0.498553	0.746299	1	0.143914	0.40405	-1.00418	-0.422175	-2.79672	-1.30739	135476	106982	96154	59800.8	46312.8	62702.4	65707.3	68493.5	118505	15339.1	10671.6	11377.2	0	0	5380.64	0	9853.07	5253.49
412.115	7.15884	C22H20O8	4	Podophyllotoxone	5	134376	neg	21	0	0	1	0.711321	0.802556	1	1.13618	1.06753	-0.491427	-0.317326	0.184186	0.0942718	85351	73861.9	81005.3	63596.4	50130.8	57145.1	53423	69736.8	69628.7	74045.2	60349.3	49571.4	48849.7	64310.1	95857.8	56180.5	54188.3	86019.7
179.081	7.64941	C7H9N5O	2	7-Aminomethyl-7-carbaguanine	5	133455	pos	24	0	0	1	1.08809	0.949348	1	1.22564	1.04211	0.121798	-0.0749904	0.29353	0.0595127	85969.4	93453.3	102297	94918.5	78162.4	133455	93210.3	102890	71349.9	36387.1	27874.1	35446	32179.5	43356.1	46669.1	32376.9	37185.4	34343.9
492.491	2.89186	C33H64O2	2	Tritriacontane-16,18-dione	5	132756	neg	24	0	0	1	1.06641	0.979418	1	1.16744	0.979137	0.092762	-0.0300031	0.223344	-0.0304172	111399	107240	113138	120239	100815	132756	96675.8	105922	122350	49676.1	51150.3	42169.6	41453.9	50562.7	74922.2	43291	50346.5	46375.2
230.163	7.14451	C11H22N2O3	2	Leu-Val	5	132383	pos	24	Peptide(di-)	Hydrophobic peptide	1	1.26629	0.872611	1	1.11119	1.50955	0.340604	-0.196589	0.152102	0.594122	103527	64895.5	71103.5	132383	70683.9	100242	58080.7	94278	56654.6	19368.8	18348.6	20793.2	27844.3	19697.6	17474.3	28655.6	26897.8	32771.5
858.526	2.81909	C45H79O13P	22	PI(36:4)	5	132028	neg	15	Lipids: Glycerophospholipids	Glycerophosphoinositols	1	1.49002	0.837233	NA	NA	NA	0.57533	-0.256299	NA	NA	91009.5	82172.6	81496.8	121638	132028	125811	61306.6	68694.4	83224.5	0	0	0	0	0	0	0	0	0
286.214	3.61277	C16H30O4	4	[FA hydroxy,oxo(16:0)] 9-hydroxy-16-oxo-hexadecanoic acid	5	131274	neg	24	Lipids: Fatty Acyls	Fatty Acids and Conjugates	1	0.902844	0.751209	1	0.963286	0.814094	-0.147452	-0.412714	-0.053964	-0.296732	131274	126513	91326.7	90821.1	98294.6	126079	64554.4	86266.8	111436	91460.9	41360.7	41817.4	62369.4	55425.1	50432.7	68304.8	29676	44191.8
233.101	11.0032	C8H15N3O5	4	Ala-Gly-Ser	5	130891	neg	15	Peptide(tri-)	Polar peptide	1	1.01672	0.784289	NA	NA	NA	0.0239206	-0.350544	NA	NA	109076	99519.1	92737.2	130891	86619.9	88859.3	75919.5	89184.9	71227	0	0	0	0	0	0	0	0	0
248.064	13.3003	C8H12N2O7	2	Asp-Asp	5	129367	negpos	15	Peptide(di-)	Acidic peptide	1	0.514401	0.495331	NA	NA	NA	-0.959034	-1.01353	NA	NA	129367	63673.6	102871	85820.8	29118.4	37278.3	31560.8	52590.8	62422.8	0	0	0	0	0	0	0	0	0
301.298	7.1623	C18H39NO2	3	Sphinganine	5	127766	pos	15	Lipids: Sphingolipids	Sphingolipid metabolism	1	1.08865	1.46624	NA	NA	NA	0.122534	0.552121	NA	NA	53652.6	66343.7	60105.1	81845.2	68313	45908.3	71722.5	127766	64583.4	0	0	0	0	0	0	0	0	0
886.557	2.83677	C47H83O13P	26	PI(38:4)	5	127423	neg	24	Lipids: Glycerophospholipids	Glycerophosphoinositols	1	1.03196	1.03812	1	0.974613	0.874395	0.0453832	0.0539749	-0.0370988	-0.193644	111267	97801	111047	127423	114890	88032.5	101501	121921	108896	25594.9	26417	20686.8	18963.1	26070.8	25819	20586.1	22679.3	20301.9
158.999	7.18381	C5H5NO3S	1	3-pyridinesulfonate	5	125306	neg	24	0	0	1	0.678777	0.838582	1	0.738094	1.10923	-0.558991	-0.253976	-0.438123	0.149559	119271	115885	118112	77370.6	62864.6	99555.3	79718.3	125306	91220.2	60500.7	48325.9	53963.4	26594.8	53821.8	39737.7	52643.3	79511.4	48416.9
352.334	2.99651	C23H44O2	12	[FA (23:1)] 22-tricosenoic acid	5	124408	neg	24	Lipids: Fatty Acyls	Fatty Acids and Conjugates	1	0.91873	0.790581	1	0.923422	1.18497	-0.122287	-0.339015	-0.114938	0.244847	104872	124408	114809	102010	106152	107964	74518.1	99666.2	97846.5	35511.7	16554.7	25893.9	21289.3	27933.1	22767.8	24744.7	29408.6	38227.1
796.526	2.80404	C44H77O10P	19	PG(38:5)	5	123005	neg	15	Lipids: Glycerophospholipids	Glycerophosphoglycerols	1	0.796896	0.756468	NA	NA	NA	-0.327536	-0.40265	NA	NA	110921	107076	123005	104194	79182.3	88366.5	84640.3	80127	93189.6	0	0	0	0	0	0	0	0	0
272.072	10.7557	C12H16O5S	1	phenyl-1-thio-&beta;-D-galactopyranoside	5	121679	pos	18	0	0	1	0.803371	1.18811	NA	NA	NA	-0.315862	0.248665	NA	NA	121679	76548.9	63373.2	64185.1	89698.6	56278.8	115731	108274	86804.6	0	0	0	5902.45	0	1959.78	14166.1	0	0
292.128	10.2987	C12H16N6O3	1	His-His	5	121139	pos	15	Peptide(di-)	Basic peptide	1	0.692981	0.714643	NA	NA	NA	-0.529112	-0.484704	NA	NA	117513	63120.2	121139	108626	54245.3	46251.3	56049	93318.7	66292.3	0	0	0	0	0	0	0	0	0
438.444	2.90438	C29H58O2	3	[FA (29:0)] nonacosanoic acid	5	119644	neg	24	Lipids: Fatty Acyls	Fatty Acids and Conjugates	1	0.776664	0.820974	1	1.14807	0.932591	-0.364638	-0.284591	0.199213	-0.100684	92820.7	104235	119644	80984.1	73589.6	91395.8	80467.8	95859.8	83675.1	41055.1	51153.1	33816.7	37018.8	52119.4	55547.2	34549.2	41375.2	41605.2
365.132	12.6981	C14H23NO10	2	2-(acetylamino)-1-5-anhydro-2-deoxy-3-O-b-D-galactopyranosyl-D-arabino-Hex-1-enitol	5	119151	pos	15	0	0	1	0.823699	0.728991	NA	NA	NA	-0.27981	-0.456028	NA	NA	62779.4	79213.5	119151	104560	47012.2	63532.5	75717.9	76055.7	38598.1	0	0	0	0	0	0	0	0	0
268.153	7.67324	C12H20N4O3	2	His-Leu	5	116127	posneg	16	Peptide(di-)	Basic peptide	1	0.827815	0.701379	NA	NA	NA	-0.27262	-0.511733	NA	NA	113558	89976.7	108356	116127	78353.5	63706.5	56767.7	96884.1	65101.6	0	0	0	0	1155.94	0	0	0	0
882.526	2.81357	C47H79O13P	13	PI(38:6)	5	114090	neg	15	Lipids: Glycerophospholipids	Glycerophosphoinositols	1	1.31166	0.825858	NA	NA	NA	0.391391	-0.276035	NA	NA	89129.7	74664.6	69738.9	114090	98113	94112.4	62042.3	73192.5	57630.2	0	0	0	0	0	0	0	0	0
172.074	9.81318	C8H12O4	4	2-Octenedioicacid	5	114018	neg	24	0	0	1	0.99061	0.654642	1	1.03441	1.17343	-0.0136111	-0.611222	0.0488127	0.230731	64169.7	96392.6	108882	79807.4	73088.9	114018	67826.9	49911.5	58651.1	48443.8	50746.2	42786.8	53626.2	41842	51394.6	37704.5	56725	72170.3
146.058	8.41467	C6H10O4	16	Adipate	5	113725	neg	24	Lipids: Fatty Acyls	Caprolactam degradation	1	0.926139	0.674488	1	1.02326	1.04529	-0.1107	-0.568135	0.0331661	0.0639067	80600.8	78658	99985.8	113725	71140.3	55231.2	49435	74464.8	50957.6	9547.54	9903.11	9084.11	9721.02	9920	9557.32	7783.37	11985.6	10058.2
246.147	4.11601	C12H22O5	1	3-Hydroxydodecanedioicacid	5	111849	neg	24	Lipids: Fatty Acyls	0	1	1.6654	0.893236	1	0.986832	1.18712	0.735869	-0.162886	-0.019123	0.24746	53691.3	48437	46210.3	111849	44815.3	90379.1	40403	42764.1	49334.4	37613.7	35643.6	27842.3	27479.1	41870.5	30418.7	47764.5	27056.5	45195.8
232.142	13.0743	C10H20N2O4	3	Ile-Thr	5	111435	pos	24	Peptide(di-)	Hydrophobic peptide	1	1.03365	0.736868	1	1.35784	0.965059	0.0477518	-0.440522	0.441311	-0.0513106	86092.1	100663	93311.7	96652.8	81404.1	111435	53916.1	86326.1	66130.2	6813.69	4632.19	6707.79	6400.2	8145.74	10103.8	5095.15	5729.02	6695.21
129.058	10.4683	C9H7N	3	Isoquinoline	5	111234	pos	24	0	0	1	0.746964	0.955847	1	0.977287	1.01973	-0.420889	-0.0651483	-0.0331455	0.0281853	76735.6	80564	111234	75393.1	57241.9	67950	73948.6	107605	75123.1	13049.1	13875.2	13812	10872.4	14169.3	14769.3	13214	13429.4	14896.5
789.551	2.80921	C42H80NO10P	18	PS(36:1)	5	108381	neg	15	Lipids: Glycerophospholipids	Glycerophosphoserines	1	0.907886	0.928022	NA	NA	NA	-0.139417	-0.107769	NA	NA	85788.1	96328.1	88744	82501.2	108381	55028.5	74465.6	89335.8	87562.9	0	0	0	0	0	0	0	0	0
480.222	7.07732	C22H32N4O8	10	Ala-Leu-Asp-Tyr	5	108244	neg	24	Peptide(tetra-)	Hydrophobic peptide	1	0.955027	0.874729	1	1.117	1.21048	-0.0663871	-0.193092	0.159627	0.275582	31296.3	45558.6	40557.7	27745.5	35272.4	49114.1	36064.8	37862.3	28777	48892.2	63936.2	66092.8	108244	20010.7	71599.8	82872.4	62291.4	71417.2
259.189	10.4627	C12H25N3O3	2	Leu-Lys	5	106835	posneg	15	Peptide(di-)	Basic peptide	1	1.01596	0.870013	NA	NA	NA	0.0228404	-0.200891	NA	NA	73501.8	47064.3	88083.7	106834	44417.3	60727.6	44244.3	87804.4	49479.3	0	0	0	0	0	0	0	0	0
466.475	2.90275	C31H62O2	23	[FA (31:0)] hentriacontanoic acid	5	102856	neg	24	Lipids: Fatty Acyls	Fatty Acids and Conjugates	1	0.980964	0.973643	1	1.25622	0.969343	-0.0277273	-0.0385349	0.329086	-0.0449212	92772.3	96118.2	90046.2	81665.5	89105.4	102856	87323.8	90114.4	94146.6	47569	41045	37583.4	41788.5	48908.2	67834.5	36815.3	42200.9	43312.3
171.064	13.0939	C6H9N3O3	1	6-diazo-5-oxonorleucine	5	101387	pos	17	0	0	1	0.489511	0.685884	NA	NA	NA	-1.03059	-0.543964	NA	NA	67330.9	77181.7	101387	57076.1	36901.7	26393	43250.8	70272.3	55135.7	0	0	0	0	1286.69	893.515	0	0	0
253.077	4.40939	C12H15NO3S	1	Thiorphan	5	100823	pos	24	0	0	1	0.800872	0.641014	1	0.806466	0.922534	-0.320357	-0.641571	-0.310314	-0.116325	54542.6	26858.9	100823	53349	50216.1	42373.3	34114.5	48948.9	33745.1	22412.8	17754.9	16936.7	14132.8	15316.4	16603.5	16993	13098.8	22589
214.095	12.873	C9H14N2O4	1	Pyrimidine nucleoside	5	100258	pos	24	0	0	1	1.20233	0.94702	1	1.33212	1.16179	0.265829	-0.0785331	0.413723	0.216348	56468.9	100258	72147.9	84053.7	94252.1	96876	66104.3	85841.2	64803.2	6207.31	8946.58	7587.38	7916.14	9855.88	12522.1	6130.56	8917.86	11372.1
153.994	13.3604	C3H6O5S	1	3-sulfopropanoate	5	99587	neg	24	0	0	1	0.864911	0.516996	1	0.381843	0.908292	-0.209377	-0.951774	-1.38895	-0.138772	99586.5	47832.2	92770.6	83651.5	95760.3	28330.5	30331.5	40431.1	53414.5	16258.3	11642.8	8555.96	2357.27	9084.91	2478.66	14568.6	11336.8	7208.2
302.17	12.8481	C11H22N6O4	2	Ala-Gly-Arg	5	97842	pos	22	Peptide(tri-)	Basic peptide	1	1.00518	0.886432	1	1.48158	0.18676	0.00745091	-0.173918	0.567139	-2.42074	94693.4	70260.2	76615.3	75777.4	97842.3	69200	71998.3	76477.1	65659	1986.4	1902.66	3743.04	3144.41	4227.83	3935.35	0	1425.37	0
480.491	2.92393	C32H64O2	11	[FA (32:0)] dotriacontanoic acid	5	96201	neg	24	Lipids: Fatty Acyls	Fatty Acids and Conjugates	1	0.93668	0.905449	1	1.19808	0.978725	-0.0943722	-0.143295	0.260722	-0.0310239	84776.3	73577.7	89651.3	54666.2	96201	81434.4	64254.8	75633.7	84667.5	30074.1	34518.9	33062.7	35364.6	35845.2	45789.3	28313.4	34416.6	32848.2
834.525	2.81601	C43H79O13P	21	PI(34:2)	5	96165	neg	15	Lipids: Glycerophospholipids	Glycerophosphoinositols	1	1.12976	0.757985	NA	NA	NA	0.176023	-0.399759	NA	NA	88027.7	70689	90522.4	96165.3	94519.6	90896.7	55083	69856.5	63979.9	0	0	0	0	0	0	0	0	0
280.106	9.7704	C13H16N2O5	2	Phe-Asp	5	94826	neg	15	Peptide(di-)	Hydrophobic peptide	1	0.520569	0.712344	NA	NA	NA	-0.941838	-0.489355	NA	NA	94826.2	69248.4	89848.1	66787.4	35920.1	29476.7	46521.5	51766.3	82592.4	0	0	0	0	0	0	0	0	0
173.069	10.4185	C7H11NO4	6	5-Deoxy-5-aminoshikimic acid	5	94649	pos	24	0	0	1	0.946011	0.861641	1	1.2909	1.13231	-0.0800709	-0.214841	0.368373	0.179264	79505.3	91990.7	94648.9	77060.2	87372.1	87343.8	67931	72243.3	89147.1	22706.1	23080.5	32461.8	25912.6	37723.7	37374.2	28894.2	31662.6	28044.3
173.048	8.16669	C10H7NO2	4	2-Quinolinecarboxylic acid	5	93926	neg	24	0	0	1	1.21401	1.10611	1	0.856757	1.26035	0.279774	0.14549	-0.223042	0.333827	64221.3	56393.1	68975.3	79890.9	60019.1	90252.9	72426.9	93926.3	43353.2	24038.3	20992.9	27837.9	14423.4	19245.1	28762.7	33237.6	36136.3	22466.8
168.054	7.59	C7H8N2O3	1	2,3-Diaminosalicylic acid	5	93607	pos	24	0	0	1	0.96352	0.696631	1	1.27725	1.05862	-0.0536132	-0.521534	0.353041	0.0821848	78765.3	83052.4	82446.2	79058.2	62688.4	93606.6	54482.8	58102.4	57576.6	21331.7	18290.6	26744	23649.3	28747.1	32369.9	23610.8	23193.9	23452.1
246.133	13.2702	C9H18N4O4	2	L-N2-(2-Carboxyethyl)arginine	5	92303	pos	15	Biosynthesis of Secondary Metabolites	Clavulanic acid biosynthesis	1	0.4886	0.739158	NA	NA	NA	-1.03327	-0.436045	NA	NA	80130.3	73899.1	92303.2	38096	23266.6	58995.4	40421.5	76539.8	65117.3	0	0	0	0	0	0	0	0	0
150.068	7.03197	C9H10O2	10	4-Coumaryl alcohol	5	92044	neg	24	Biosynthesis of Secondary Metabolites	Phenylpropanoid biosynthesis	1	0.979299	0.790277	1	0.604048	0.838806	-0.0301794	-0.33957	-0.727264	-0.253591	40955.3	40948.3	29990	34352.8	29362.8	45861.7	25147	33456.7	29823.3	22711.1	24365.1	29466	12044.7	11734.1	22456.4	11010.9	20188.1	33005.1
222.1	8.17177	C11H14N2O3	1	Phe-Gly	5	90140	neg	15	Peptide(di-)	Hydrophobic peptide	1	0.82325	0.749586	NA	NA	NA	-0.280598	-0.415834	NA	NA	90140	50916	67804.4	76150.2	51847.2	43946.9	38838.4	66914.9	50805.5	0	0	0	0	0	0	0	0	0
261.132	12.7925	C10H19N3O5	5	Lys-Asp	5	88661	pos	15	Peptide(di-)	Basic peptide	1	0.961781	0.903917	NA	NA	NA	-0.0562192	-0.145737	NA	NA	65959.6	54112	87923.2	88660.8	43970.8	67414	60068.2	71327.8	56614.2	0	0	0	0	0	0	0	0	0
254.138	8.70443	C11H18N4O3	2	Val-His	5	87535	posneg	20	Peptide(di-)	Basic peptide	1	1.16182	0.722046	1	1.94585	0	0.216383	-0.469838	0.9604	NA	59875.6	43689.3	73052.1	81190.9	36471	87534.8	34362.5	58489.2	34673.9	3120.26	0	3098.22	6163.45	3950.5	1986.28	0	0	0
278.032	10.3744	C6H16O8P2	1	hexanediol 1,6-bisphosphate	5	86317	neg	24	0	0	1	1.16863	0.709167	1	0.966303	0.549171	0.224813	-0.495803	-0.0494525	-0.864674	35080.2	44648.3	51115.1	40779.9	25810.5	86316.7	31718.4	41841.8	19229.7	7167.45	5129.52	6823.53	2522.21	6597.03	9356.95	2367	5065.34	3068.08
96.969	11.9388	[H2PO4]-	1	Dihydrogenphosphate	5	85318	neg	15	0	0	1	0.983546	0.851115	NA	NA	NA	-0.0239351	-0.232575	NA	NA	63914.6	59772	73446	85317.7	50824.1	57747.3	42730.9	70033.8	55017.7	0	0	0	0	0	0	0	0	0
131.073	10.4793	C9H9N	3	Skatole	5	85218	pos	23	0	0	1	0.779132	0.928268	1	0.874297	0.569975	-0.36006	-0.107387	-0.193804	-0.81103	50994	50146.7	85217.9	65751.3	35731.1	43715.6	53074	68461.4	51455.4	5746.6	6273.91	4448.54	4173.54	5707.99	4517.31	0	2913.59	6473.35
252.111	4.64387	C12H16N2O4	3	3-Hydroxyhexobarbital	5	84730	neg	15	0	0	1	0.988746	0.598448	NA	NA	NA	-0.0163282	-0.740702	NA	NA	81469.2	32095.9	52027.8	84729.5	38447.2	40552.5	19916.5	45535.1	33647.1	0	0	0	0	0	0	0	0	0
284.09	7.53567	C13H16O7	1	p-Cresolglucuronide	5	84569	neg	24	0	0	1	0.948593	0.839478	1	1.14287	0.942029	-0.0761389	-0.252435	0.192661	-0.086157	61205.1	66233.6	66650	58063.9	41477.8	84569.4	52404	56587.6	53941.7	32664.7	30276.1	31307.4	30035.6	35593.5	42084.3	24500.1	30660.1	33624.3
313.095	7.06887	C17H15NO5	1	Melicopine	5	83575	pos	21	0	0	1	1.51706	0.764483	1	1.06784	1.07379	0.601281	-0.387443	0.0946914	0.102716	36690.4	49105.6	37889.6	61580.6	42482.9	83575.4	29661.9	33185.8	31707.9	24679.5	20986	16279.3	21423.5	27748.8	16974.6	27913.5	17242.9	21359.5
534.538	2.93515	C36H70O2	6	Arachidyl palmitoleate	5	82343	neg	24	Lipids: Fatty Acyls	Fatty esters	1	1.09533	1.09907	1	1.16918	0.897952	0.131361	0.136284	0.2255	-0.15529	71011.2	47898	47121.7	43537.6	55977.9	82342.6	71788.3	58612.1	52079.3	29073.1	37617	24637.6	32664.9	33863.2	40250.7	23880.5	30582.8	27544.6
508.522	2.93235	C34H68O2	10	[FA (34:0)] tetratriacontanoic acid	5	82338	neg	24	Lipids: Fatty Acyls	Fatty Acids and Conjugates	1	1.00751	0.920618	1	1.32561	0.972084	0.0107947	-0.119325	0.406652	-0.0408475	81126.8	66053.7	66258	64698.3	68005.3	82338	61868.3	79086	55541.2	29601.2	38496.4	21540.7	29253.9	42520.9	47050.3	24260	32200.8	30675.1
252.122	8.89141	C11H16N4O3	1	Pro-His	5	82287	pos	15	Peptide(di-)	Basic peptide	1	0.628559	0.648989	NA	NA	NA	-0.669879	-0.623735	NA	NA	82286.7	63986	81129.2	58901.3	50381.7	33652.6	44151	43637.6	59792.7	0	0	0	0	0	0	0	0	0
145.02	13.1771	C5H7NO2S	2	3,4-Dehydrothiomorpholine-3-carboxylate	5	81868	neg	24	0	0	1	0.723891	0.696393	1	1.1614	0.998078	-0.466155	-0.522026	0.215865	-0.00277591	73866	56920.2	81868.2	64826.2	35704.5	53408.1	49859	52377.4	45854.7	12901.1	9603.64	10547.5	10945.9	14948	12493	11033.1	10101.7	11854
382.345	2.98681	C24H46O3	4	[FA hydroxy(24:0)] 2-hydroxy-15-tetracosenoic acid	5	79813	neg	24	Lipids: Fatty Acyls	Fatty Acids and Conjugates	1	1.03246	0.980502	1	1.18285	0.850021	0.0460811	-0.028408	0.242264	-0.234429	52721.5	79813.5	57894.2	47919	71625.5	77065.4	59767.1	61009.3	65939.8	40799.4	32403.8	24444.6	25076.5	41314.1	49111.8	18966.2	38578.6	25457.9
906.526	2.81752	C49H79O13P	8	PI(40:8)	5	78904	neg	15	Lipids: Glycerophospholipids	Glycerophosphoinositols	1	1.42293	0.866591	NA	NA	NA	0.508862	-0.206577	NA	NA	46885.8	42450.3	55484.4	78904	65532.7	61632.4	35961	45466.9	44072.3	0	0	0	0	0	0	0	0	0
522.538	2.92651	C35H70O2	3	[FA (35:0)] pentatriacontanoic acid	5	78405	neg	24	Lipids: Fatty Acyls	Fatty Acids and Conjugates	1	1.22783	1.19617	1	1.15411	0.909859	0.296109	0.258418	0.206782	-0.136284	52472.5	42511.1	59247.6	55674	55290.1	78405.2	51099.8	63389.1	69997.1	28963.9	24436.1	19960.2	31737.1	20487.3	32441.5	21646.2	17927.2	27174.1
199.121	3.8352	C10H17NO3	4	N-hexanoyl-D,L-homoserine lactone	5	77730	neg	23	0	0	1	1.00683	0.946453	1	1.53923	0.97267	0.00982246	-0.079397	0.622209	-0.0399775	56231.1	68219.8	56728	62046.4	46063	74307.3	50900.4	77729.6	42847.4	10796	14938.5	16059	19247.9	13773.8	31308.1	20212.4	20438.9	0
158.084	7.76958	C10H10N2	1	Nicotyrine	5	77610	neg	24	0	0	1	1.28236	0.823981	1	1.33657	0.956912	0.358804	-0.279318	0.41854	-0.0635426	48690.7	51612.4	50139.6	61694	53617.5	77610.5	35685.2	47890.3	40386.3	23898	22492.4	28094.4	26495.7	43933.2	29125.7	22808.2	20994.7	27472.5
223.085	7.86208	C11H13NO4	2	Bendiocarb	5	77006	posneg	24	0	0	1	1.52781	0.799193	1	1.5946	1.29134	0.611469	-0.323383	0.673196	0.368865	34242.2	33756.4	48755.3	77006.1	58336.4	43035.8	29257.5	38925.8	25125.7	7944.69	5806.14	6672.89	9467.41	16959.5	6140.72	10212.3	5705.21	10456.4
263.112	11.3592	C9H17N3O6	2	Ala-Ser-Ser	5	75493	neg	15	Peptide(tri-)	Polar peptide	1	0.821566	0.644363	NA	NA	NA	-0.283552	-0.634054	NA	NA	69079.2	55790.6	75492.7	70712.1	44198.6	49700.2	32256.8	48477.9	48371.5	0	0	0	0	0	0	0	0	0
289.127	10.7668	C11H19N3O6	4	Pro-Ser-Ser	5	73953	neg	15	Peptide(tri-)	Polar peptide	1	0.377309	0.638542	NA	NA	NA	-1.40618	-0.647146	NA	NA	54305.9	38067	73953	27277.9	16879.8	18598.7	27876.6	42793.7	35535.8	0	0	0	0	0	0	0	0	0
268.154	4.76837	C12H20N4O3	2	His-Leu	5	73656	pos	16	Peptide(di-)	Basic peptide	1	1.15896	0.974448	NA	NA	NA	0.212827	-0.037343	NA	NA	58097.7	27422.8	61772.8	73655.9	44199.7	52851	49083.6	55154.2	39292	0	0	0	0	0	1546.74	0	0	0
208.058	10.9668	C7H12O7	1	1-O-methyl-&beta;-D-glucuronate	5	72216	neg	24	0	0	1	1.06363	0.990966	1	1.07726	0.783498	0.0889993	-0.013092	0.107368	-0.351998	56247.7	71505	47803.9	68190.3	46321.1	72216.2	55077.8	70827.7	48065.2	21398.1	17913.9	19751	15753.4	19053	28819.8	17368.5	13216.9	15690.4
191.044	8.70073	C7H5N5O2	1	6-formyl-H2-pterin	5	71231	negpos	24	0	0	1	0.780697	0.921769	1	0.633892	0.854706	-0.357166	-0.117523	-0.657691	-0.226499	70644.5	58910.7	62868	47044.4	38870.8	64309	58186.1	71231.2	47952.4	25238.3	22116.3	16183.9	7951.72	9555.96	22768.9	22987.1	16823.7	14496
394.381	2.93097	C26H50O2	11	[FA (26:0)] 9-hexacosenoic acid	5	70264	neg	24	Lipids: Fatty Acyls	Fatty Acids and Conjugates	1	1.09687	0.958351	1	1.32298	1.13764	0.133394	-0.0613747	0.403788	0.186049	55456.5	43472.7	63581.4	53935.8	54053.3	70264.1	48207.3	49485.8	58049	16178.9	17266.4	17088.7	21151.2	19909.1	25795.2	16314.3	23382.1	17793.4
139.063	12.8522	C7H9NO2	3	Gabaculine	5	69361	pos	24	0	0	1	0.871894	0.743654	1	1.10499	1.24619	-0.197776	-0.427296	0.14403	0.317525	69361.3	43166.1	45669.5	40938.5	49043.4	47949	35796.7	41423.4	40423.7	32290.1	25831.5	24754.2	24881.8	35629.2	31065.7	33993.7	38884.4	30401
242.102	10.638	C9H14N4O4	1	Ser-His	5	68639	posneg	24	Peptide(di-)	Basic peptide	1	0.99467	0.848652	1	1.24539	1.77194	-0.0077108	-0.236754	0.316599	0.825333	63896.8	48214.4	68638.8	65372.7	48824.2	65589.5	50735.5	41771.2	60887.2	7463.19	3987.1	5054.04	4955.84	7276.81	8321.7	5391.79	8950.62	14902.3
698.489	2.83271	C39H71O8P	17	PA(36:3)	5	66955	neg	17	Lipids: Glycerophospholipids	Glycerophosphates	1	1.46139	0.919949	NA	NA	NA	0.547345	-0.120374	NA	NA	44479.4	33243	46263.2	66955	65453.6	48783.2	35135.3	31783.4	47141.7	0	0	0	5181	5256.66	0	0	0	0
158.084	4.67096	C10H10N2	1	Nicotyrine	5	66541	neg	24	0	0	1	1.48535	0.919836	1	1.14132	1.39694	0.5708	-0.120552	0.190707	0.482273	34637.6	36914.1	26437.9	47462.8	31544.8	66541	32383.9	43093.6	14656.9	13831	11674.3	20166.4	25076.6	10523.1	16526.4	14001.1	23558.5	26241
890.588	2.88604	C47H87O13P	16	PI(38:2)	5	66216	neg	15	Lipids: Glycerophospholipids	Glycerophosphoinositols	1	1.45309	0.635098	NA	NA	NA	0.539128	-0.654948	NA	NA	46569.8	30133.4	32097.7	66215.6	52030.4	39852.1	15961.7	27592.1	25545.6	0	0	0	0	0	0	0	0	0
250.062	8.30153	C8H14N2O5S	2	Glu-Cys	5	65843	neg	24	Peptide(di-)	Acidic peptide	1	0.73081	0.841615	1	0.784981	0.885307	-0.452432	-0.248768	-0.34927	-0.17575	57935	60564.6	65499	37153.6	31471.1	65843.3	46234.7	56679.9	51941.3	44342.7	39208.6	33661	24178	29623.7	38207.7	33879.7	34323.8	35565.4
127.027	12.7425	C5H5NO3	1	2,3,6-Trihydroxypyridine	5	64186	neg	24	Metabolism of Cofactors and Vitamins	Nicotinate and nicotinamide metabolism	1	0.95753	0.673187	1	0.91956	0.805442	-0.0626099	-0.570921	-0.120984	-0.312148	53034.2	48335.8	64186.5	63960.9	33603.5	60961.1	33984.1	45521.6	31944.8	17170.6	17609.7	26067.1	14641.8	20254.1	21056.9	18962.4	14557.1	15489.5
413.329	7.08446	C27H43NO2	6	[ST] (22R,25R)-spirosol-5-en-3beta-ol	5	64175	pos	23	Lipids: Sterol lipids	Sterols	1	0.881668	0.937227	1	4.27318	5.88298	-0.181692	-0.0935293	2.09531	2.55655	40292.7	52999.5	57746.5	64175.4	37000.2	31990.3	49287.6	56700.7	35569.2	2875.88	8003.45	0	5562.92	36623.1	4303.29	9558.72	35316.1	19128.1
96.0211	12.6907	C5H4O2	3	Furfural	5	64131	pos	24	0	methanofuran biosynthesis	1	0.642009	0.941986	1	0.844526	0.796765	-0.639334	-0.0862226	-0.243786	-0.327773	49766.8	41300.1	64131.1	32225.4	29548.6	37864.5	43094.5	61658.8	41440.9	24981.2	22236.9	20215.3	17799.2	17098	22052	13320.5	19574.3	20833.8
329.329	7.13265	C20H43NO2	1	[SP dimethyl,amino(18:0/2:0)] 2S-dimethylaminooctadecane-1,3R-diol	5	64027	pos	15	Lipids: Sphingolipids	Sphingoid bases	1	1.16657	1.50521	NA	NA	NA	0.222267	0.589962	NA	NA	30205.4	29442.8	30318.5	40810.9	37406.8	26734.2	39532.4	64026.6	31859.5	0	0	0	0	0	0	0	0	0
174.015	10.5033	C7H7O2SF	1	Phenylmethanesulfonyl fluoride	5	62589	pos	24	0	0	1	1.24587	1.01244	1	1.46113	1.15359	0.317148	0.0178376	0.547086	0.206125	36004.2	49585.2	27622.7	42738.9	35719.5	62588.6	38897.7	41517.5	34205.3	18380.6	18475.8	22942	27937.3	25982.1	33453.9	13195.9	22246.3	33540.4
120.006	13.6577	C3H4O5	1	2-Hydroxymalonate	5	62135	neg	24	0	0	1	0.908748	0.69172	1	0.957959	0.888041	-0.138048	-0.531739	-0.0619645	-0.171302	46147.6	50878.2	55252.1	39576.1	36670.8	62135.4	29666.5	37057.2	38610.1	10511.1	15950	11441.7	9207.74	11092	16009.5	12633.2	12676.3	8349.73
303.143	9.99397	C12H21N3O6	6	Leu-Asp-Gly	5	61472	neg	15	Peptide(tri-)	Hydrophobic peptide	1	0.622019	0.722136	NA	NA	NA	-0.684968	-0.469658	NA	NA	40716	35707	61471.5	44918.3	25428.1	15426.7	30908	31706	36964.6	0	0	0	0	0	0	0	0	0
397.167	8.19014	C18H27N3O5S	3	Leu-Cys-Tyr	5	61183	pos	24	Peptide(tri-)	Hydrophobic peptide	1	0.846884	0.736327	1	1.09292	1.05026	-0.239764	-0.441581	0.128194	0.0707474	51728.7	60961.8	50213.1	36147.9	40629	61183.5	42532.6	43051.6	34366	11542.4	8832.57	12591.2	7134.8	14741.1	14153.7	9422.64	7164.25	18036.3
403.088	13.5734	C12H22NO12P	1	6-(alpha-D-Glucosaminyl)-1D-myo-inositol 1,2-cyclic phosphate	5	60804	negpos	15	0	0	1	0.978298	0.778621	NA	NA	NA	-0.0316546	-0.361007	NA	NA	39390.6	36734.1	45698.7	60804.1	30697	27678.4	25668.1	34213.2	34972.9	0	0	0	0	0	0	0	0	0
257.101	8.60013	C10H15N3O5	1	5-Methylcytidine	5	59973	pos	23	0	0	1	0.74653	0.593223	1	1.09303	1.18462	-0.421728	-0.753352	0.128334	0.24443	43244.2	43616.6	59973	49030.1	29923.5	30662.2	19130.1	43374	24601.2	3912.22	0	5409.5	2866.02	2460.93	4861.97	4928.4	2910.84	3203.49
190.074	10.1448	C10H10N2O2	2	L-5-benzyl-hydantoin	5	59663	pos	24	0	0	1	0.852995	0.498031	1	1.16039	1.0985	-0.229392	-1.00569	0.214605	0.135532	50461.4	51019.6	47166.4	59662.5	39016	28116.9	27267.5	25750.4	21013.1	14657.5	14154.1	15348.8	11772.6	16739.4	22731.3	14459.2	18671	15380.1
97.0162	8.27745	C4H3NO2	1	Maleimide	5	59083	pos	24	0	0	1	0.967995	0.824676	1	1.18466	1.12772	-0.0469288	-0.278101	0.244472	0.173415	47712.6	51221.8	56223.7	52131	38978.7	59082.6	37574.3	52237.2	38143.6	18772.8	11674.8	17711.1	14699	18202.6	24150.1	25633.7	14348.5	14327.7
452.157	23.7021	C16H28N4O9S	3	Glu-Thr-Thr-Cys	5	58570	neg	24	Peptide(tetra-)	Acidic peptide	1	1.25278	0.966519	1	0.804408	0.783392	0.325129	-0.04913	-0.314	-0.352194	47824.6	32636.9	32809.3	56513.5	31148.2	54241.4	40390.2	32257.8	36830.4	42543.1	44100.7	26195.6	33441	32101.1	25226.9	31041.7	35416.4	21939.4
318.165	12.9055	C11H22N6O5	1	Gly-Ser-Arg	5	57861	pos	15	Peptide(tri-)	Basic peptide	1	0.788895	0.802501	NA	NA	NA	-0.342094	-0.317425	NA	NA	45155.1	57861.3	53720.7	41387.8	48300	33961.3	36208.4	48295.8	41277.5	0	0	0	0	0	0	0	0	0
365.206	7.23216	C17H27N5O4	2	Leu-Pro-His	5	57835	pos	15	Peptide(tri-)	Basic peptide	1	0.555964	0.488268	NA	NA	NA	-0.846937	-1.03425	NA	NA	53452.9	57834.5	43247.5	40668.7	22883.6	22363.5	20283.3	36841.5	18329.6	0	0	0	0	0	0	0	0	0
424.037	11.5637	C14H18NO10S2	1	Sinalbin	5	56388	neg	15	0	0	1	0.791221	1.32393	NA	NA	NA	-0.337848	0.404822	NA	NA	32047.1	31151.3	43785.2	34841.9	25179.1	24626.7	37191.1	56388.1	48059.2	0	0	0	0	0	0	0	0	0
160.121	12.9443	C7H16N2O2	6	L-Carnitinamide	5	56169	pos	24	0	0	1	1.2246	1.02109	1	0.986379	0.911465	0.292316	0.0301125	-0.0197863	-0.133741	37789.8	44744.2	28752.6	47889.5	32223.9	56168.6	38585.6	33762.6	41285.6	31388.3	21067	22302.4	21608.3	28283.6	23847.5	17595.4	26247.4	24296.2
550.569	2.94109	C37H74O2	2	[FA (37:0)] heptatriacontanoic acid	5	55916	neg	24	Lipids: Fatty Acyls	Fatty Acids and Conjugates	1	1.08806	1.0296	1	1.25804	1.19375	0.121765	0.0420868	0.331183	0.255507	38184.5	43716.1	41084.4	35241.8	48849.7	49724.2	45868.7	41269.3	39487.7	21340.2	17887.8	17190.5	19825.1	28110.3	23041.5	22310.7	23317.7	21721.3
278.127	7.67083	C14H18N2O4	3	Pro-Tyr	5	55778	pos	15	Peptide(di-)	Hydrophobic peptide	1	0.885231	0.633863	NA	NA	NA	-0.175874	-0.657758	NA	NA	37987.2	30704	48985.6	55777.7	24713.9	23679.6	16906.5	33103.4	24581	0	0	0	0	0	0	0	0	0
422.234	2.97809	C20H38O7S	1	1,4-Bis(2-ethylhexyl) sulfosuccinate	5	53285	neg	22	0	0	1	0.653634	0.88297	1	0.446705	1.21785	-0.613445	-0.179563	-1.1626	0.28434	53285.4	51875	41189	46894.8	19877.8	28886.3	42654.1	46922.7	39645.3	18299.6	15199.8	19075.5	0	23485.5	0	25104.2	18247.3	20677
219.13	7.92622	C10H21NO2S	1	pentahomomethionine	5	52604	neg	14	0	0	1	0.639019	0.843229	NA	NA	NA	-0.64607	-0.246004	NA	NA	40886	33333.3	52604.3	44966.6	36076.1	0	24829.4	42453.3	39658.7	0	0	0	0	0	0	0	0	0
284.112	11.8916	C11H16N4O5	2	Coformycin	5	49448	negpos	22	0	0	1	0.671697	0.636345	1	0.744317	0.560127	-0.574118	-0.652119	-0.42601	-0.836174	40346.1	37305.3	49447.6	34774.9	25257.3	25339.9	22255.2	31845.8	26777.9	9052.99	5291.53	5253.73	0	4176.87	10410.5	0	4853.9	6123.61
369.361	7.09083	C23H47NO2	1	[SP hydroxy,methyl,methyl(18:2/2:0)] 2S-(hydroxymethyl)-4S-(12-methyloctadecyl)azetidin-3R-ol	5	49066	pos	24	Lipids: Sphingolipids	Sphingoid bases	1	0.836386	0.849829	1	1.55168	2.2714	-0.25776	-0.234755	0.633831	1.18358	40972.6	44692.6	41131.3	38286.9	34604.3	33159.5	33722.3	40249.1	33784	14097.8	30816.2	6510	25925.3	31914.8	21953.5	40445.1	34057.9	42301.6
264.147	7.06194	C14H20N2O3	2	Subaphyllin	5	49022	pos	23	0	0	1	1.4705	1.04977	1	1.14645	0.586971	0.556306	0.0700674	0.19717	-0.768639	29522.8	21147.1	22515.5	49022	25308	33289.1	16703.7	34474.6	25649.2	2516.56	6254.11	3068.55	5374.1	5001.93	3197.02	0	4041.05	2908.23
339.096	8.64613	C15H17NO8	2	6-Hydroxy-5-methoxyindoleglucuronide	5	48890	neg	24	0	0	1	0.967042	0.880517	1	1.0302	1.15866	-0.0483492	-0.183578	0.0429295	0.212458	41730.2	46606.4	38821	38376.2	35701	48889.7	33285.5	42353.2	36325.7	22130.1	17653.8	15018.5	13836.1	21279.9	21341.5	20071.3	17103.5	26322.6
138.035	8.86542	C4H10O3S	1	1-butanesulfonate	5	47281	pos	24	0	0	1	0.990965	0.784251	1	0.980907	0.4339	-0.0130938	-0.350612	-0.0278112	-1.20456	42356.9	38329.6	39075.4	37226.3	43721.1	37732.4	30665.8	36216.5	27041.1	25869.8	39700.4	19182.8	17595.3	18258.4	47281	12515	12183.4	12075.9
807.506	2.81147	C44H74NO10P	13	PS(38:6)	5	47066	neg	15	Lipids: Glycerophospholipids	Glycerophosphoserines	1	0.788843	0.783558	NA	NA	NA	-0.34219	-0.351887	NA	NA	46422	33627.4	47066.4	34372.2	28762.3	37139.9	32004.1	31606	35992.6	0	0	0	0	0	0	0	0	0
143.04	5.12166	C6H9NOS	1	5-(2-Hydroxyethyl)-4-methylthiazole	5	46376	pos	24	Metabolism of Cofactors and Vitamins	Thiamine metabolism	1	1.59126	1.02894	1	1.30032	1.24229	0.670171	0.0411563	0.378871	0.313007	21731.7	16633.5	22639.3	46375.9	19841.6	30856.6	18150.5	22705.7	21913.6	12786.9	10200	12271	13406.9	18301	14138.9	10975.5	15592.7	17232.6
172.048	7.24729	C6H8N2O4	2	(R)-AMAA	5	43899	neg	24	0	0	1	0.824299	1.17669	1	1.13675	0.965746	-0.278761	0.234737	0.184909	-0.0502845	20035.9	29558.4	28377.5	14920.5	18811	30540.7	32098	26898.1	32752.9	32658.7	36569.8	30109.8	43898.8	33520.2	35503.4	36259.9	27499.7	32175.9
221.069	8.65279	C11H11NO4	1	6-Hydroxyindolelactate	5	43823	pos	24	0	0	1	1.00478	0.671483	1	0.90815	1.12365	0.00688655	-0.574578	-0.138998	0.168191	28551.1	39427.6	38477.3	43278	19864.4	43823	18894.7	31008.1	21580.6	8993.07	3516.37	10696	6125.64	6825.79	8122.6	7920.33	4849.71	13304.7
356.206	7.66194	C16H28N4O5	5	Leu-Gln-Pro	5	43602	pos	15	Peptide(tri-)	Hydrophobic peptide	1	0.569493	0.525279	NA	NA	NA	-0.812251	-0.928845	NA	NA	40416.7	30711.3	43602.5	34799.5	16930.3	13608.4	11645.6	26407.6	22212.3	0	0	0	0	0	0	0	0	0
226.992	13.2644	C5H9NO5S2	1	2-(sulfomethyl)thiazolidine-4-carboxylate	5	42883	negpos	24	Metabolism of Cofactors and Vitamins	coenzyme M biosynthesis	1	1.02001	0.705626	1	0.969492	0.987284	0.0285768	-0.503025	-0.0446997	-0.0184623	27076.9	25469.1	26804	22686.2	15368.4	42882.8	20018.8	19538.1	16434.4	10120.9	8078.34	10852.6	7159.73	9445.63	11560.2	8995.49	10064.3	9622.73
210.101	13.1121	C10H14N2O3	2	2,6-Dihydroxypseudooxynicotine	5	42695	pos	24	Metabolism of Cofactors and Vitamins	Nicotinate and nicotinamide metabolism	1	1.22699	1.17079	1	1.1468	1.0556	0.295118	0.227484	0.197618	0.0780652	33420.6	31168.7	22214.2	42695.2	29063.8	34747.6	35416.1	41336.2	24876.5	14954.8	12431.1	13884.5	12880.5	15418.8	19029.7	16739.4	13966.4	12859.3
246.006	10.7207	C5H12O7P2	3	[PR methyl(4:0)] 3-methylbut-3-enyl pyrophosphate	5	42366	neg	15	Lipids: Prenols	Biosynthesis of steroids__Terpenoid biosynthesis	1	0.719548	0.596498	NA	NA	NA	-0.474837	-0.745411	NA	NA	35165.9	30754.5	42366.2	34129	21431.8	22356.6	16650.3	20902.8	27039.7	0	0	0	0	0	0	0	0	0
259.153	7.79209	C11H21N3O4	5	Leu-Ala-Gly	5	42139	neg	15	Peptide(tri-)	Hydrophobic peptide	1	0.91347	0.803088	NA	NA	NA	-0.13057	-0.31637	NA	NA	36126	27209.3	42138.5	38207.9	33189.4	24950	20430.7	34091.6	30182.6	0	0	0	0	0	0	0	0	0
212.091	11.3535	C8H12N4O3	1	Gly-His	5	40843	neg	23	Peptide(di-)	Basic peptide	1	1.2419	0.916979	1	1.36098	0.660852	0.312548	-0.12504	0.444646	-0.597601	31900.4	25629.5	29578.5	38970.8	28366.4	40842.5	22818.9	27107.3	29950.4	8813.39	3838.57	3376.35	3037.94	10139.5	8636.72	0	3009.02	7583.32
524.151	11.8096	C21H28N6O6S2	2	Asn-Trp-Cys-Cys	5	38933	neg	15	Peptide(tetra-)	Hydrophobic peptide	1	0.819536	0.91758	NA	NA	NA	-0.287121	-0.124094	NA	NA	34909	33094.1	34445.1	31066.1	25506.6	27387.3	38933.1	29046.2	26025.2	0	0	0	0	0	0	0	0	0
305.159	8.65359	C12H23N3O6	3	Leu-Ser-Ser	5	38791	neg	15	Peptide(tri-)	Hydrophobic peptide	1	0.60336	0.713109	NA	NA	NA	-0.72891	-0.487805	NA	NA	38791	14536	25579.3	22776.9	14023.5	10808.4	12909.1	21941.8	21417.9	0	0	0	0	0	0	0	0	0
164.059	7.80198	C8H8N2O2	1	Ricinine	5	35906	pos	24	0	0	1	1.00061	1.08311	1	1.03502	1.12494	0.000874328	0.115179	0.0496607	0.169847	33959.5	30404.5	29235.8	25515.2	33721.8	34419.4	31209.2	34263.3	35906.2	17717.3	15263	11830.3	10530.2	17269.2	18580.6	20570.2	12304.2	17534.9
139.063	11.7286	C7H9NO2	3	Gabaculine	5	32988	neg	24	0	0	1	0.757847	0.994375	1	0.682413	0.877106	-0.400021	-0.00813808	-0.551283	-0.189177	23713	24110.3	28521	11066.3	13803.3	32987.8	25397.1	22522.5	27995.3	18367.1	19046.4	16694.9	7730.12	9973.29	19220.9	15726.7	15376.2	16355.9
274.132	8.195	C15H18N2O3	1	indole-3-acetyl-valine	5	32312	neg	24	0	IAA degradation V	1	0.959138	0.766666	1	0.797387	0.783648	-0.060189	-0.383331	-0.326649	-0.351723	26271.5	27797	23818.8	22475.4	19917.1	32312.1	19673.1	25093.3	14947.2	11167.2	12204.3	10527.8	6184.03	7748.06	13098.7	7188.75	8221.24	11155.1
216.063	13.1088	C9H12O6	1	cis-(homo)3aconitate	5	32102	pos	16	Metabolism of Cofactors and Vitamins	coenzyme B biosynthesis	1	0.819891	0.851203	NA	NA	NA	-0.286496	-0.232425	NA	NA	20418.8	15127.4	32101.8	29873.4	11739.5	13851.1	16878.2	22139.7	18564.3	0	0	0	0	1212	0	0	0	0
230.09	8.78627	C9H14N2O5	1	Aspartyl-L-proline	5	30623	pos	15	Peptide(di-)	Acidic peptide	1	0.337807	0.519233	NA	NA	NA	-1.56573	-0.945545	NA	NA	28717.5	20733.4	30622.5	9294.87	10795.4	6959.1	8951.33	17328.5	15297	0	0	0	0	0	0	0	0	0
279.107	11.4419	C9H17N3O7	1	Ser-Ser-Ser	5	29994	neg	15	Peptide(tri-)	Polar peptide	1	0.67705	0.684772	NA	NA	NA	-0.562665	-0.546305	NA	NA	25115.3	19052.1	29994.4	22869.7	16426.1	10915.5	10807.7	20704.7	19271.5	0	0	0	0	0	0	0	0	0
222.074	10.3118	C8H14O7	3	6-Acetyl-D-glucose	5	29262	neg	24	0	0	1	0.712186	1.05264	1	1.37185	0.819747	-0.489673	0.0740153	0.456122	-0.286749	25141.2	13096.4	29261.8	25202.6	11625.9	11243.7	23612	28611	18829.9	4752.84	3763.71	4194.26	8587.79	4064.55	4784.97	2545.24	4370.21	3504.19
282.122	8.67296	C13H18N2O5	1	Thr-Tyr	5	26300	neg	15	Peptide(di-)	Hydrophobic peptide	1	0.955235	0.802254	NA	NA	NA	-0.0660731	-0.317869	NA	NA	26299.5	14432.3	21910.8	25855.1	19927.3	14055.9	9918.06	25814.6	14522.6	0	0	0	0	0	0	0	0	0
340.15	10.5607	C13H20N6O5	3	Ala-Asn-His	5	25764	neg	15	Peptide(tri-)	Basic peptide	1	0.796088	1.00718	NA	NA	NA	-0.329001	0.0103167	NA	NA	17707.8	19728	24589.9	22918.2	10379.8	16079.9	14473.2	25764	22233.6	0	0	0	0	0	0	0	0	0
118.042	8.18757	C8H6O	1	Benzofuran	5	25053	neg	24	0	0	1	0.783295	0.731345	1	0.823892	0.8172	-0.352371	-0.451376	-0.279472	-0.291239	21984.5	25052.5	20775.8	13317.4	16943.7	22856.4	15082.3	19869.2	14643.1	10801.1	10529.6	9408.16	5325.09	10111.5	9888.97	6451.13	9624.35	9044.35
139.063	8.64467	C7H9NO2	3	3,4-dihydroxybenzylamine	5	24496	pos	24	0	0	1	1.25608	1.18337	1	0.81764	1.11037	0.328933	0.242904	-0.290463	0.151035	13142.3	17421.6	14305	24495.6	13606.2	18257.4	14396.9	23318	15381.8	12869	8662.33	10553.5	8353.88	9470.25	8409.64	12642.2	9769.99	13213.6
309.132	8.18518	C14H19N3O5	3	Ala-Gly-Tyr	5	24386	pos	15	Peptide(tri-)	Hydrophobic peptide	1	0.636743	0.711878	NA	NA	NA	-0.651216	-0.490297	NA	NA	24386.1	24333.8	24063	24007.3	11120.2	11216.5	13905.7	20590.7	17316.1	0	0	0	0	0	0	0	0	0
144.09	23.9829	C6H12N2O2	3	dehydrolysine	5	23631	neg	24	0	0	1	1.08787	1.27496	1	0.900819	0.861454	0.121505	0.350449	-0.15069	-0.215155	15087.2	14644	14545.8	15577.8	16253.9	16335.9	23631.4	16959.4	15860.5	18817.7	19956.9	18465.2	16902.5	17971.1	16689	14999.5	16685.5	17624.5
321.1	10.5624	C11H19N3O6S	4	gamma-L-Glutamyl-L-cysteinyl-beta-alanine	5	23626	neg	12	0	0	1	0	0.716344	NA	NA	NA	NA	-0.481275	NA	NA	21431	18299.9	23625.9	0	0	0	14504.6	14796.3	16084.4	0	0	0	0	0	0	0	0	0
166.038	7.67861	C7H6N2O3	1	4-Hydroxy-3-nitrosobenzamide	5	23298	neg	24	0	0	1	1.03195	0.839102	1	1.28191	0.66113	0.0453712	-0.253081	0.358295	-0.596995	14673.5	19617.8	15016.2	15197.8	12387.1	23297.8	10873.8	15500.7	14999.5	7416.55	7355.39	3507.86	8483.86	6424.85	8524.36	3677.71	3066.62	5341
279.122	7.7013	C13H17N3O4	2	Phe-Asn	5	22501	negpos	15	Peptide(di-)	Hydrophobic peptide	1	0.671602	0.731361	NA	NA	NA	-0.574321	-0.451344	NA	NA	20457.6	13883.1	22501	16438.9	12619.1	9116.94	10997.1	15470.9	15103.8	0	0	0	0	0	0	0	0	0
109.029	7.87621	C6H5O2	2	Benzosemiquinone	5	22392	neg	24	0	0	1	1.25191	0.628231	1	1.20709	1.10994	0.32413	-0.670633	0.271539	0.150475	12749.8	12708.1	22392	20307.7	20374.7	19221.1	8660.21	11907.4	9493.08	7658.98	5967.33	8713.5	8440.47	9582.9	8942.9	6671.04	9660.87	8463.84
115.027	8.26995	C4H5NO3	1	Maleamate	5	20932	pos	24	Metabolism of Cofactors and Vitamins	Nicotinate and nicotinamide metabolism	1	1.11954	0.735436	1	1.00964	0.872138	0.1629	-0.443329	0.013836	-0.197372	11253.9	17374.7	16696.8	20931.6	11556.1	18255.8	12333.2	12222.3	8778.44	7872.76	3828.96	6403.31	4845.12	5686.33	7748.05	6903.52	4015.36	4871.2
208.062	13.0938	C6H13N2O4P	1	N-acetyl-demethylphophinothricin	5	20523	pos	24	0	0	1	1.21456	1.4194	1	1.11052	1.01216	0.280432	0.505278	0.151236	0.0174341	6949	6089.03	5403.6	3995.9	8537.85	9864.68	9213.1	7752.31	9210.58	15754.9	13158.4	17703.6	20522.6	16708.2	14538.2	13958	15480.9	17744.8
259.189	15.4722	C12H25N3O3	2	Ile-Lys	5	20523	pos	24	Peptide(di-)	Basic peptide	1	1.20297	0.794537	1	1.12381	1.31793	0.266597	-0.331813	0.168397	0.398277	10207.5	11204.9	16099	16892.4	7709.79	20522.8	9540.68	11345.1	8918.46	4284.19	4749.78	4722.14	4119.43	5452.74	5887.08	5257.2	5575.55	7296.88
235.048	8.3212	C11H9NO5	1	3,4-Dihydro-7-methoxy-2-methylene-3-oxo-2H-1,4-benzoxazine-5- carboxylic acid	5	20002	neg	15	0	0	1	2.03351	1.05212	1	0	0	1.02397	0.0732961	NA	NA	20001.6	5438.97	0	15998.7	16829.2	18905.8	11081.2	12393.9	3291.37	0	0	1935.91	0	0	0	0	0	0
261.111	8.08811	C13H15N3O3	1	Trp-Gly	5	18257	pos	15	Peptide(di-)	Hydrophobic peptide	1	0.988675	0.970086	NA	NA	NA	-0.0164318	-0.0438153	NA	NA	12041	12089.4	12437.4	18257.4	10117.1	7779.23	9641.26	12940.5	12892.3	0	0	0	0	0	0	0	0	0
166.066	7.55443	C6H14O3S	1	hexanesulfonate	5	18113	pos	24	0	0	1	1.01666	0.918048	1	1.1062	1.02749	0.0238417	-0.123358	0.145614	0.0391311	13156.9	15317.1	13860.6	13846.2	11080.9	18113.1	12335.1	15673.3	10857	6275.85	5140.28	6346.32	4763.31	7305.82	7579.72	5138.39	5988.29	7124.15
474.125	10.472	C16H23N6O9P	1	glutamyl-beta-ketophosphonate-adenosine	5	17068	neg	15	0	0	1	0.809782	0.819625	NA	NA	NA	-0.304395	-0.286965	NA	NA	17068	16355.6	13399.9	13512	11898.5	12506.3	11594.4	14217.5	12565.7	0	0	0	0	0	0	0	0	0
333.133	10.7345	C16H19N3O5	1	Glu-Trp	5	16925	neg	16	Peptide(di-)	Hydrophobic peptide	1	0.781911	0.724387	NA	NA	NA	-0.354924	-0.465167	NA	NA	16924.8	12929.1	16353.3	15478.9	7448.96	13202	9445.07	13706.8	10320	0	0	0	0	0	0	0	0	5075.04
275.127	7.94078	C14H17N3O3	1	Trp-Ala	5	16593	pos	15	Peptide(di-)	Hydrophobic peptide	1	0.695229	0.694291	NA	NA	NA	-0.524439	-0.526387	NA	NA	11535.3	11115.7	16592.6	12642.6	8953.49	5687.25	8149.76	10427	8669.79	0	0	0	0	0	0	0	0	0
253.095	10.5974	C12H15NO5	1	N-Acetylvanilalanine	5	16272	neg	24	0	0	1	1.40816	0.932675	1	2.28831	1.68876	0.493815	-0.100554	1.19428	0.755962	9150.98	7879.67	11543.8	16272.2	12170.6	11794.8	6752.75	10855.1	9042.82	2388.31	2077.45	2186.46	5463.61	4708.38	5050.36	3849.52	4884.37	2500.1
240.074	7.98156	C10H12N2O5	1	Dinoseb	5	15743	pos	16	0	0	1	0.776572	0.795308	NA	NA	NA	-0.364809	-0.330414	NA	NA	9931.73	9987.64	15742.6	9794.44	7875.89	10023.8	8466.3	9811.7	10084.3	0	0	0	0	0	1166.75	0	0	0
194.106	13.2534	C10H14N2O2	1	6-Hydroxypseudooxynicotine	5	15235	pos	24	Metabolism of Cofactors and Vitamins	Nicotinate and nicotinamide metabolism	1	0.91324	0.88882	1	1.05077	1.05486	-0.130934	-0.170037	0.0714524	0.0770569	13715	13801.8	10806.8	10572.3	11604.4	12821.9	11213.3	11595.3	11254.2	4099.8	4517.03	4119.32	4294.79	4852.38	4235.63	3380.71	4430.2	5623.98
183.101	8.15634	C8H13N3O2	1	Nalpha,Nalpha-Dimethyl-L-histidine	5	15140	pos	24	0	0	1	0.927581	0.919581	1	0.824433	0.816016	-0.108454	-0.120951	-0.278526	-0.293331	15140	10755.9	10635	11902.6	11801.7	10181.1	8218.14	13709.7	11665.4	6462.1	4133.51	4471.7	4122.47	4397.73	3901.79	3910.65	4315.65	4068.86
236.116	13.3897	C12H16N2O3	4	Phe-Ala	5	10798	pos	22	Peptide(di-)	Hydrophobic peptide	1	1.07013	0.999402	1	1.82849	1.96129	0.0977878	-0.000862692	0.870651	0.971805	8599.88	6700.32	7317.97	10797.9	5704.37	7702.19	6102.5	9330.73	7171.43	959.562	1067.35	0	1397.28	918.276	1390.63	0	2525.9	1449.47
265.131	7.53669	C14H19NO4	2	N(alpha)-Benzyloxycarbonyl-L-leucine	5	10782	pos	24	0	0	1	0.832242	0.837452	1	1.03234	0.939809	-0.264924	-0.255921	0.0459134	-0.08956	8553.36	10497.7	10782.4	9438.1	6802.8	8587.77	7245.09	10315.1	7423.91	2543.83	3031.6	2828.7	1185.84	3825.75	3664.3	1900.15	2743.01	3255.13
343.131	7.28822	C13H21N5O4S	1	Met-Gly-His	5	10692	pos	15	Peptide(tri-)	Basic peptide	1	1.01383	0.939462	NA	NA	NA	0.0198164	-0.0900928	NA	NA	7183.2	4239.86	10692.5	7962.91	7532.12	6926.35	6711.49	7997.17	6068.04	0	0	0	0	0	0	0	0	0
87.0319	7.33695	C3H5NO2	3	2-Oxazolidinone	5	9211	pos	21	0	0	1	0.92195	0.831686	1	0.251831	0.518713	-0.11724	-0.265889	-1.98947	-0.946991	8619.61	7048.38	9211.1	7826.48	6451.26	8659.53	6544.75	8133.36	6013.48	1685.98	1189.2	1901.75	0	1202.98	0	0	1200.44	1277.42
229.179	13.71	C11H23N3O2	1	N1,N8-diacetylspermidine	5	7396	pos	20	0	0	1	0.784591	0.841188	1	1.5374	1.28313	-0.349987	-0.249499	0.620497	0.359671	7107.11	7395.89	7191.86	6266.64	4181.48	6573.47	4780.11	7012.72	6456.63	0	0	2204.99	0	2158.09	1231.86	0	939.99	1889.3
213.1	13.3224	C10H15NO4	2	Kainic acid	5	6493	pos	24	0	0	1	1.01559	0.88338	1	1.00771	0.893194	0.0223225	-0.178893	0.0110737	-0.162955	6493.2	4391.07	4452.11	5241.3	4938	5396.22	4869.32	4058.29	4620.25	2373.7	2541.19	2113.54	2716.88	2325.88	2039.82	1718.07	2213.45	2346.23
195.09	7.14528	C10H13NO3	6	Metyrosine	4.5	136122	pos	24	Xenobiotics Drugs etc	0	1	0.628068	0.733718	1	0.850137	0.79374	-0.671008	-0.446703	-0.234233	-0.333261	127144	56535.4	136122	36274.6	96184	68398.1	54245.7	108155	72243.1	63792.7	49306.8	72721.5	50987.9	59681.2	47304.1	63927.4	41049	42517.2
240.147	10.8558	C12H20N2O3	2	Pirbuterol	2.5	350156	pos	24	Xenobiotics Drugs etc	0	1	1.12749	0.760172	1	1.19386	1.17764	0.173114	-0.395602	0.255636	0.235896	206347	208247	350156	309466	265022	287760	206121	172832	202389	46037.2	51689.9	58814.6	53589.6	57082.5	76217	54047.4	67183.4	63118.6
140.059	7.23248	C6H8N2O2	7	4,5,6,7-Tetrahydroisoxazolo(5,4-c)pyridin-3-ol	2.5	49888	pos	24	Xenobiotics Drugs etc	0	1	0.793778	0.853121	1	0.88129	0.904746	-0.333193	-0.229178	-0.182311	-0.144415	49888	37887.9	49270	37785.2	28044.1	42954.7	34400.1	40312.9	42203.7	36267.2	21091.2	19675.4	20703.3	25120.3	22065.5	23681.1	23851.8	22163.1
