# Supplementary material
Source: Research Square preprint supplement (doi:10.21203/rs.3.rs-8903249/v1)
Supplement: Supplementary file 2 [file aefa7fc00cc779494ac814b1.xlsx]

## Sheet: Cloning
ID	Purpose	Species	Sequence (5' to 3'; restriction sites underlined)	Description	Target vector	Cloning restriction enzyme(s)	Linearisation restriction enzyme(s)	Reference PMID hyperlink (if applicable)
TbDMT-OE_F	Molecular cloning	Trypanosoma brucei	TCTAGAATGGCATCCCAAAATGCAGC	Forward primer for overexpression of TbDMT	pGL2271	XbaI/BamHI	AscI	33141865
TbDMT-OE_R	Molecular cloning	Trypanosoma brucei	GGATCCCTAACTGGAGCGCGAACC	Reverse primer for overexpression of TbDMT
TbDMT-RNAi_F	Molecular cloning	Trypanosoma brucei	GATCCTCGAGGGTACCTGGTATTGTGATGATTCTTT	Forward primer for RNAi-mediated knock-down of TbDMT	pRPaiSL	KpnI/BamHI/ApaI/XbaI	AscI	18588918
TbDMT-RNAi_R	Molecular cloning	Trypanosoma brucei	GATCTCTAGAGGATCCGTATTGCTCAAAACAGTAAC	Reverse primer for RNAi-mediated knock-down of TbDMT
TbDMT-CRISPR_F1	Molecular cloning	Trypanosoma brucei	AGGGGGGTGGACCACAGAGTGAGG	Forward sgRNA 1 for TbDMT CRISPR/Cas9 knockout	pT7sgRNA	BbsI	NotI	29785042
TbDMT-CRISPR_R1	Molecular cloning	Trypanosoma brucei	AAACCCTCACTCTGTGGTCCACCC	Reverse sgRNA 1 for TbDMT CRISPR/Cas9 knockout
TbDMT-CRISPR_F2	Molecular cloning	Trypanosoma brucei	AGGGGATGGGGCGGATGTTTCGCG	Forward sgRNA 2 for TbDMT CRISPR/Cas9 knockout
TbDMT-CRISPR_R2	Molecular cloning	Trypanosoma brucei	AAACCGCGAAACATCCGCCCCATC	Reverse sgRNA 2 for TbDMT CRISPR/Cas9 knockout
TcoDMT-KO_5UTR_F	Molecular cloning	Trypanosoma congolense	GCGGCCGCTAAGAATATGAGCGAAGA	Forward primer to amplify the 5'-UTR region of the TcoDMT gene	Allele replacement vector for TcoDMTdKO	NotI/XbaI/NsiI/XhoI	NotI/XhoI	14555482
TcoDMT-KO_5UTR_R	Molecular cloning	Trypanosoma congolense	GCTCTAGATGCTCGTAATGTGCCTGTAG	Reverse primer to amplify the 5'-UTR region of the TcoDMT gene
TcoDMT-KO_3UTR_F	Molecular cloning	Trypanosoma congolense	ATGCATGTAAGGGATGTGGGAAGAGG	Forward primer to amplify the 3'-UTR region of the TcoDMT gene
TcoDMT-KO_3UTR_R	Molecular cloning	Trypanosoma congolense	CTCGAGTCCTTCACCCCTTACCCATA	Reverse primer to amplify the 3'-UTR region of the TcoDMT gene
TcoDMT_RNAi_F	Molecular cloning	Trypanosoma congolense	AAGCTTGAACCTGATAACACCGGAGC	Forward primer to amplify a segment of TcoDMT for RNAi-mediated knockdown	pTcoVRNAi	HindIII/FseI	NotI	33481935
TcoDMT_RNAi_R	Molecular cloning	Trypanosoma congolense	GGCCGGCCACAAATGGCCAGAATAATAT	Reverse primer to amplify a segment of TcoDMT for RNAi-mediated knockdown
TcoDMT-OE_F	Molecular cloning	Trypanosoma congolense	ATCGATATGAACCGTCCAGATGCACC	Forward primer to amplify the TcoDMT gene for insertion into pMB_DP for tubulin-integrated overexpression	pMB_DP	ClaI/BamHI	AscI	33141865
TcoDMT-OE_R	Molecular cloning	Trypanosoma congolense	GGATCCTCAGTCGACTTTGCTGCGGG	Reverse primer to amplify the TcoDMT gene for insertion into pMB_DP for tubulin-integrated overexpression
TcoDMT-tag-UTR-F	Molecular cloning	Trypanosoma congolense	TAGCGGCCGC GGCTCAGGGGTAACGC	Forward primer to amplify the TcoDMT 5'-UTR for endogenous tagging	pEnNY0	NotI/XbaI/BamHI	NotI	33481935
TcoDMT-tag-UTR-R	Molecular cloning	Trypanosoma congolense	ACAGGATCC ATATTTTGTTGCGCTTGTCGTTCGT	Reverse primer to amplify the TcoDMT 5'-UTR for endogenous tagging
TcoDMT-tag-CDS-F	Molecular cloning	Trypanosoma congolense	CATCTAGA ATGAACCGTCCAGATGCAC	Forward primer to amplify the TcoDMT 5' CDS for endogenous tagging
TcoDMT-tag-CDS-R	Molecular cloning	Trypanosoma congolense	TAGCGGCCGC CCCTCAATGGTTTCGTTTTCCT	Reverse primer to amplify the TcoDMT 5' CDS for endogenous tagging
TcoDMT-OE-tag-F	Molecular cloning	Trypanosoma congolense	ATCGATATGGAGACTAGTCGCAAGGG	Forward primer to amplify sfGFP from the endogous tagging vector for N-terminal tagging of ectopic TcoDMT	TcoDMTOE	ClaI	AscI	N/A
TcoDMT-OE-tag-R	Molecular cloning	Trypanosoma congolense	ATCGATCTTGTACAGCTCGTCCATGC	Reverse primer to amplify sfGFP from the endogous tagging vector for N-terminal tagging of ectopic TcoDMT
TbDMT_qPCR_F	qPCR	Trypanosoma brucei	TGACCATTATCGGTGCGTGT	Forward qPCR primer for TbDMT	-	-	-	N/A
TbDMT_qPCR_R	qPCR	Trypanosoma brucei	GCCACCTGATGATGCTTGTG	Reverse qPCR primer for TbDMT	-	-	-
TbTERT_qPCR_F	qPCR	Trypanosoma brucei	GAGCGTGTGACTTCCGAAGG	Forward qPCR primer for TbTERT (endogenous control)	-	-	-	20302889
TbTERT_qPCR_R	qPCR	Trypanosoma brucei	AGGAACTGTCACGGAGTTTGC	Reverse qPCR primer for TbTERT (endogenous control)	-	-	-
TcoDMT_qPCR_F	qPCR	Trypanosoma congolense	ACATCGGGCATTTGGACCTT	Forward qPCR primer for TcoDMT	-	-	-	29032180
TcoDMT_qPCR_R	qPCR	Trypanosoma congolense	CAGTGCACCAACGAAAGCAA	Reverse qPCR primer for TcoDMT	-	-	-
TcoTERT_qPCR_F	qPCR	Trypanosoma congolense	TTTCGCCCTCGTTTTCCTCA	Forward qPCR primer for TcoTERT (endogenous control)	-	-	-
TcoTERT_qPCR_R	qPCR	Trypanosoma congolense	AGAAATCACGACCACACGCT	Reverse qPCR primer for TcoTERT (endogenous control)	-	-	-
