# Supplementary material
Source: Research Square preprint supplement (doi:10.21203/rs.3.rs-8903249/v1)
Supplement: Supplementary file 3 [file d89a2abb495027c7b164f7c5.xlsx]

## Sheet: AFDB-PROTEOME
Target	Description	Scientific Name	Prob.	Seq. Id.	E-Value	Score	Query Pos.	Target Pos.
AF-Q580H7-F1-model_v4	Uncharacterized protein	Trypanosoma brucei brucei TREU927	1	59.3	9.29e-34	1605	23-407 (414)	1-405 (407)
AF-A4HT28-F1-model_v4	EamA-like_transporter_family_-_putative	Leishmania infantum	1	27.8	4.13e-20	830	1-395 (414)	1-608 (610)
AF-D3ZT80-F1-model_v4	Solute carrier family 35, member F5	Rattus norvegicus	1	26.6	2.43e-18	806	1-414 (414)	1-501 (524)
AF-Q8R314-F1-model_v4	Solute carrier family 35 member F5	Mus musculus	1	25.1	1.6e-18	804	1-414 (414)	1-499 (524)
AF-Q03730-F1-model_v4	Uncharacterized vacuolar membrane protein YML018C	Saccharomyces cerevisiae S288C	1	27.2	6.87e-18	803	38-414 (414)	3-393 (393)
AF-Q8WV83-F1-model_v4	Solute carrier family 35 member F5	Homo sapiens	1	25.8	1.81e-18	791	1-414 (414)	1-498 (523)
AF-Q553G3-F1-model_v4	Uncharacterized protein	Dictyostelium discoideum	1	26.2	3.17e-19	764	1-409 (414)	84-519 (530)
AF-Q7K3M9-F1-model_v4	GH27640p	Drosophila melanogaster	1	25.1	1.34e-17	744	44-414 (414)	4-436 (449)
AF-K7MN43-F1-model_v4	EamA domain-containing protein	Glycine max	1	27.8	2.78e-16	703	47-402 (414)	4-390 (393)
AF-I1M9H2-F1-model_v4	EamA domain-containing protein	Glycine max	1	26.3	1.19e-15	687	47-403 (414)	4-391 (393)
AF-Q7XQE4-F1-model_v4	Os04g0645600 protein	Oryza sativa Japonica Group	1	28	7.85e-16	687	44-403 (414)	3-394 (396)
AF-B4FYG0-F1-model_v4	EamA-like transporter family	Zea mays	1	24.3	6.37e-16	687	44-403 (414)	3-395 (398)
AF-O49378-F1-model_v4	AT4g32140/F10N7_50	Arabidopsis thaliana	1	26.3	8.18e-16	684	47-403 (414)	4-392 (394)
AF-O94654-F1-model_v4	Uncharacterized transporter C405.03c	Schizosaccharomyces pombe 972h-	1	30.2	2.04e-15	677	42-400 (414)	3-340 (341)
AF-A0A0K0EHM1-F1-model_v4	EamA domain-containing protein	Strongyloides stercoralis	1	21.2	4.97e-16	674	43-414 (414)	10-419 (444)
AF-C0NFP3-F1-model_v4	Thiamine-repressible mitochondrial transporter THI74	Histoplasma capsulatum G186AR	1	28.3	3.71e-16	624	1-398 (414)	35-475 (477)
AF-A0A0R0K4W8-F1-model_v4	EamA domain-containing protein	Glycine max	1	24.8	3.5e-15	608	47-404 (414)	4-392 (393)
AF-A0A175W699-F1-model_v4	EamA domain-containing protein	Madurella mycetomatis	1	26.3	1.73e-15	603	1-414 (414)	39-476 (476)
AF-C1GUY4-F1-model_v4	Uncharacterized protein	Paracoccidioides lutzii Pb01	1	25.3	3.23e-15	593	1-400 (414)	35-454 (455)
AF-A0A0R0JI52-F1-model_v4	EamA domain-containing protein	Glycine max	1	23.9	1.44e-14	589	47-403 (414)	4-392 (394)
AF-I1MX36-F1-model_v4	EamA domain-containing protein	Glycine max	1	25.1	2.92e-14	583	47-408 (414)	4-391 (391)
AF-Q04083-F1-model_v4	Thiamine-repressible mitochondrial transport protein THI74	Saccharomyces cerevisiae S288C	1	27.5	3.91e-14	569	40-413 (414)	2-367 (370)
AF-A0A1D8PKH1-F1-model_v4	EamA domain-containing protein	Candida albicans SC5314	1	27.5	1.57e-14	568	31-396 (414)	1-395 (404)
AF-Q9SFT8-F1-model_v4	At3g07080	Arabidopsis thaliana	1	27.6	1.77e-14	566	42-414 (414)	2-416 (438)
AF-U7PMQ3-F1-model_v4	Uncharacterized protein	Sporothrix schenckii ATCC 58251	1	24.5	1.44e-14	564	2-396 (414)	1-478 (494)
AF-Q653X2-F1-model_v4	Os06g0681700 protein	Oryza sativa Japonica Group	1	24.4	1.17e-14	563	24-414 (414)	1-407 (450)
AF-Q95XC7-F1-model_v4	TPT domain-containing protein	Caenorhabditis elegans	1	17.6	1.34e-12	554	2-402 (414)	10-385 (392)
AF-A0A5S6PFC5-F1-model_v4	Uncharacterized protein	Brugia malayi	1	16.7	1.31e-11	552	33-407 (414)	11-346 (354)
AF-I1KZA3-F1-model_v4	Uncharacterized protein	Glycine max	1	27.8	3.45e-14	550	37-407 (414)	2-412 (438)
AF-A0A0D2H535-F1-model_v4	Unplaced genomic scaffold supercont1.1, whole genome shotgun sequence	Fonsecaea pedrosoi CBS 271.37	1	23.9	4.07e-14	543	1-414 (414)	2-478 (509)
AF-A0A044SAS5-F1-model_v4	EamA domain-containing protein	Onchocerca volvulus	1	17.4	1.07e-11	541	33-407 (414)	22-357 (365)
AF-A0A1D8PLV8-F1-model_v4	EamA domain-containing protein	Candida albicans SC5314	1	20.5	8.97e-14	535	3-414 (414)	1-401 (500)
AF-A0A1D6GTK8-F1-model_v4	EamA-like transporter family	Zea mays	1	25.5	5.68e-14	534	24-395 (414)	24-422 (460)
AF-A4IF30-F1-model_v4	Solute carrier family 35 member F4	Homo sapiens	1	20.2	2.33e-13	533	1-407 (414)	106-487 (521)
AF-A0A1D6LPD5-F1-model_v4	EamA-like transporter family	Zea mays	1	23.9	1.02e-13	525	20-414 (414)	9-433 (451)
AF-Q8BZK4-F1-model_v4	Solute carrier family 35 member F4	Mus musculus	1	20.1	5.82e-13	523	1-407 (414)	67-451 (485)
AF-A0A0K0DZS5-F1-model_v4	EamA domain-containing protein	Strongyloides stercoralis	1	16.5	1.62e-11	511	34-412 (414)	22-374 (376)
AF-F1M2H9-F1-model_v4	Solute carrier family 35, member F4	Rattus norvegicus	1	20.5	8.12e-13	510	1-407 (414)	28-422 (456)
AF-C1GPX0-F1-model_v4	Uncharacterized protein	Paracoccidioides lutzii Pb01	1	15.5	1.45e-12	506	1-414 (414)	193-608 (609)
AF-A0A1C1C8Y7-F1-model_v4	Putative vacuolar membrane protein	Cladophialophora carrionii	1	24.8	1.25e-13	501	71-414 (414)	37-420 (451)
AF-Q8IY50-F1-model_v4	Putative thiamine transporter SLC35F3	Homo sapiens	1	19.5	1.39e-12	500	1-414 (414)	27-402 (421)
AF-A4V362-F1-model_v4	Uncharacterized protein, isoform N	Drosophila melanogaster	1	18.9	1.09e-12	500	1-407 (414)	102-540 (743)
AF-A0A2R8QQK3-F1-model_v4	Solute carrier family 35 member F3b	Danio rerio	1	18.4	3.78e-12	499	1-414 (414)	4-398 (423)
AF-Q1LZI2-F1-model_v4	Putative thiamine transporter SLC35F3	Mus musculus	1	18.5	2.11e-12	496	1-407 (414)	27-390 (421)
AF-A0A0R4IR13-F1-model_v4	Solute carrier family 35 member F4	Danio rerio	1	18	1.58e-12	495	1-410 (414)	36-470 (501)
AF-M0RA35-F1-model_v4	Solute carrier family 35, member F3	Rattus norvegicus	1	18.3	1.31e-11	486	1-407 (414)	2-365 (396)
AF-A0A1D6JFZ5-F1-model_v4	EamA-like transporter family	Zea mays	1	28.8	2.52e-10	485	163-403 (414)	33-294 (297)
AF-F1RDU1-F1-model_v4	Solute carrier family 35 member F3a	Danio rerio	1	18.1	1.76e-11	479	6-414 (414)	82-466 (494)
AF-O02057-F1-model_v4	Uncharacterized protein	Caenorhabditis elegans	1	19.8	1.94e-12	474	47-412 (414)	14-420 (429)
AF-Q54E05-F1-model_v4	Uncharacterized protein	Dictyostelium discoideum	1	18.2	2.29e-12	470	12-407 (414)	39-443 (471)
AF-Q54EL2-F1-model_v4	Uncharacterized protein	Dictyostelium discoideum	1	18.4	6.12e-11	457	33-402 (414)	40-380 (381)
AF-U7PXR4-F1-model_v4	Uncharacterized protein	Sporothrix schenckii ATCC 58251	1	16.2	1.43e-11	442	1-414 (414)	46-499 (501)
AF-A0A175W0U2-F1-model_v4	Thiamine-repressible mitochondrial transport protein THI74	Madurella mycetomatis	1	15.7	3.88e-11	437	1-406 (414)	49-471 (481)
AF-Q54E06-F1-model_v4	Transmembrane protein	Dictyostelium discoideum	1	19.2	3.1e-10	430	53-412 (414)	2-347 (359)
AF-A0A1C1CDU8-F1-model_v4	Putative DUF6 domain protein	Cladophialophora carrionii	1	15.4	5.41e-11	421	1-414 (414)	121-544 (559)
AF-Q9VR50-F1-model_v4	Solute carrier family 35 member E1 homolog	Drosophila melanogaster	1	15	5.32e-10	420	40-414 (414)	3-323 (373)
AF-Q8DP82-F1-model_v4	Uncharacterized protein	Streptococcus pneumoniae R6	1	15.8	3.31e-09	418	26-401 (414)	1-317 (318)
AF-Q54KZ9-F1-model_v4	Uncharacterized protein	Dictyostelium discoideum	1	13.7	2.28e-09	412	34-413 (414)	13-342 (417)
AF-B4FM14-F1-model_v4	GDP-mannose transporter GONST5	Zea mays	1	13.6	1.7e-09	411	32-414 (414)	1-327 (333)
AF-Q9HUX6-F1-model_v4	Pseudopaline exporter CntI	Pseudomonas aeruginosa PAO1	1	14.5	2.76e-08	406	51-398 (414)	9-283 (284)
AF-A0A0D2H7D2-F1-model_v4	Unplaced genomic scaffold supercont1.4, whole genome shotgun sequence	Fonsecaea pedrosoi CBS 271.37	1	14.7	9.67e-11	404	1-414 (414)	115-537 (548)
AF-Q9HZ18-F1-model_v4	Uncharacterized protein	Pseudomonas aeruginosa PAO1	1	13	1.61e-08	403	48-414 (414)	3-297 (299)
AF-Q6YZC3-F1-model_v4	Os08g0187800 protein	Oryza sativa Japonica Group	1	13.5	1.38e-09	401	1-394 (414)	50-383 (387)
AF-Q550W6-F1-model_v4	GDP-fucose transporter 1	Dictyostelium discoideum	1	14.2	5.23e-09	399	33-402 (414)	52-367 (368)
AF-I1KBJ5-F1-model_v4	TPT domain-containing protein	Glycine max	1	11.1	1.48e-08	397	1-403 (414)	1-341 (342)
AF-A0A0H5SQI2-F1-model_v4	BMA-NSTP-10	Brugia malayi	1	14.7	1.2e-08	396	36-414 (414)	2-347 (352)
AF-Q5PR94-F1-model_v4	GDP-fucose transporter 1	Danio rerio	1	14.2	6.71e-09	395	15-414 (414)	2-344 (348)
AF-O33787-F1-model_v4	Uncharacterized inner membrane transporter YicL	Salmonella enterica subsp. enterica serovar Typhimurium str. LT2	1	15.8	1.75e-08	394	47-403 (414)	3-299 (300)
AF-A0A0R0GUQ3-F1-model_v4	TPT domain-containing protein	Glycine max	1	13	7.61e-09	392	39-399 (414)	2-307 (342)
AF-A0A077ZED4-F1-model_v4	Solute carrier family 35 member E1	Trichuris trichiura	1	15.5	9.36e-09	392	48-407 (414)	8-316 (343)
AF-Q9M5A9-F1-model_v4	Glucose-6-phosphate/phosphate translocator 1, chloroplastic	Arabidopsis thaliana	1	13.6	2.69e-09	391	1-394 (414)	47-384 (388)
AF-Q6K5E9-F1-model_v4	Os09g0467400 protein	Oryza sativa Japonica Group	1	13.1	4.08e-09	389	16-412 (414)	9-358 (361)
AF-F1RAT7-F1-model_v4	Si:ch211-263p13.7	Danio rerio	1	17.7	1.15e-08	388	81-408 (414)	1-292 (292)
AF-P0AA73-F1-model_v4	Uncharacterized inner membrane transporter YhbE	Escherichia coli K-12	1	15.8	6.34e-08	387	47-414 (414)	4-318 (321)
AF-Q6YXG6-F1-model_v4	Os09g0467300 protein	Oryza sativa Japonica Group	1	16.4	2.01e-09	385	22-414 (414)	1-386 (390)
AF-Q8BLX4-F1-model_v4	GDP-fucose transporter 1	Mus musculus	1	13.2	2.24e-08	384	42-413 (414)	34-355 (363)
AF-Q8N357-F1-model_v4	Solute carrier family 35 member F6	Homo sapiens	1	14.2	7.61e-09	382	48-414 (414)	7-352 (371)
AF-Q5VQL3-F1-model_v4	Phosphoenolpyruvate/phosphate translocator 3, chloroplastic	Oryza sativa Japonica Group	1	14	5.93e-09	382	1-401 (414)	40-387 (393)
AF-D4A0R5-F1-model_v4	Solute carrier family 35, member E2 (Predicted)	Rattus norvegicus	1	13.3	3.05e-09	382	1-414 (414)	18-394 (405)
AF-Q0PBC5-F1-model_v4	Putative integral membrane protein	Campylobacter jejuni subsp. jejuni NCTC 11168 = ATCC 700819	1	12.8	9.36e-09	380	45-397 (414)	4-307 (310)
AF-D3ZWW0-F1-model_v4	GDP-fucose transporter 1	Rattus norvegicus	1	13.2	3.13e-08	380	30-412 (414)	18-354 (363)
AF-Q8RXN3-F1-model_v4	Phosphoenolpyruvate/phosphate translocator 1, chloroplastic	Arabidopsis thaliana	1	15.1	2.92e-09	379	1-414 (414)	56-408 (408)
AF-A0A0H3GYZ3-F1-model_v4	Uncharacterized protein	Klebsiella pneumoniae subsp. pneumoniae HS11286	1	14.8	6.89e-08	378	48-411 (414)	5-315 (321)
AF-A0A077Z965-F1-model_v4	EamA domain containing protein	Trichuris trichiura	1	18.3	1.25e-08	377	47-412 (414)	3-306 (307)
AF-A0A1I9LLD6-F1-model_v4	Solute carrier family 35 protein (DUF914)	Arabidopsis thaliana	1	13.1	2.88e-08	375	34-413 (414)	29-360 (360)
AF-C6TK46-F1-model_v4	TPT domain-containing protein	Glycine max	1	13.2	2.19e-09	375	1-394 (414)	61-391 (395)
AF-Q2FV91-F1-model_v4	Uncharacterized protein	Staphylococcus aureus subsp. aureus NCTC 8325	1	12.1	2.54e-08	374	32-395 (414)	1-302 (311)
AF-Q9NQQ7-F1-model_v4	Solute carrier family 35 member C2	Homo sapiens	1	13.3	1.2e-08	374	36-414 (414)	2-332 (365)
AF-Q94GB1-F1-model_v4	Purine permease 2	Arabidopsis thaliana	1	13.2	2.24e-08	373	48-414 (414)	4-355 (358)
AF-Q9I6P9-F1-model_v4	Uncharacterized protein	Pseudomonas aeruginosa PAO1	1	10.9	1.45e-07	372	44-398 (414)	10-291 (292)
AF-P31437-F1-model_v4	Uncharacterized inner membrane transporter YicL	Escherichia coli K-12	1	17.1	2.65e-08	372	46-411 (414)	2-305 (307)
AF-Q968A5-F1-model_v4	GDP-fucose transporter	Caenorhabditis elegans	1	14.1	3.4e-08	372	33-412 (414)	5-343 (363)
AF-P78381-F1-model_v4	UDP-galactose translocator	Homo sapiens	1	15.2	5.93e-09	372	1-414 (414)	1-360 (396)
AF-Q327Y2-F1-model_v4	Putative permease transporter	Shigella dysenteriae Sd197	1	18.1	2.15e-08	371	47-412 (414)	3-306 (307)
AF-A0A0N4UDX9-F1-model_v4	Uncharacterized protein	Dracunculus medinensis	1	11.9	3.69e-08	371	32-414 (414)	1-321 (328)
AF-Q948Q8-F1-model_v4	Anthocyanin-related membrane protein 2	Arabidopsis thaliana	1	15.2	4.18e-08	371	34-413 (414)	7-321 (339)
AF-K7MR25-F1-model_v4	TPT domain-containing protein	Glycine max	1	13.2	2.92e-09	371	1-394 (414)	60-390 (394)
AF-P0CK96-F1-model_v4	Solute carrier family 35 member E2B	Homo sapiens	1	14.1	6.44e-09	371	1-414 (414)	18-394 (405)
AF-Q96K37-F1-model_v4	Solute carrier family 35 member E1	Homo sapiens	1	14.5	7.61e-09	371	25-407 (414)	9-346 (410)
AF-A0A0H3GNJ2-F1-model_v4	Uncharacterized protein	Klebsiella pneumoniae subsp. pneumoniae HS11286	1	15.5	1.04e-07	370	51-412 (414)	2-307 (308)
AF-A0A0H3GYX0-F1-model_v4	Inner membrane transporter yicL	Klebsiella pneumoniae subsp. pneumoniae HS11286	1	15.8	4.54e-08	370	34-403 (414)	2-311 (312)
AF-I1M125-F1-model_v4	TPT domain-containing protein	Glycine max	1	14.1	4.81e-09	370	1-394 (414)	54-387 (391)
AF-Q9VHT4-F1-model_v4	GDP-fucose transporter 1	Drosophila melanogaster	1	13.1	4.18e-08	369	33-407 (414)	3-329 (337)
AF-I1JY19-F1-model_v4	TPT domain-containing protein	Glycine max	1	11.4	7.18e-08	369	1-403 (414)	2-341 (342)
AF-Q96A29-F1-model_v4	GDP-fucose transporter 1	Homo sapiens	1	15.1	2.54e-08	369	31-411 (414)	19-351 (364)
AF-A0A5K4FC33-F1-model_v4	Uncharacterized protein	Schistosoma mansoni	1	11.2	2.38e-09	369	1-414 (414)	99-532 (607)
AF-Q69VR7-F1-model_v4	Phosphoenolpyruvate/phosphate translocator 1, chloroplastic	Oryza sativa Japonica Group	1	14.7	4.81e-09	367	1-414 (414)	36-408 (408)
AF-A0A1D6EXD1-F1-model_v4	Glucose-6-phosphate/phosphate translocator 2 chloroplastic	Zea mays	1	12.8	1.12e-09	367	1-414 (414)	59-415 (421)
AF-Q9ZUH3-F1-model_v4	Probable purine permease 5	Arabidopsis thaliana	1	11.2	1.61e-08	365	16-411 (414)	1-361 (361)
AF-B0UYD3-F1-model_v4	Solute carrier family 35 member 2	Danio rerio	1	13.2	3.26e-08	365	22-414 (414)	1-354 (374)
AF-Q9HWB3-F1-model_v4	Uncharacterized protein	Pseudomonas aeruginosa PAO1	1	14.8	1.4e-07	364	51-414 (414)	2-294 (296)
AF-K0ETC5-F1-model_v4	Putative chloramphenicol resistance permease, RarD	Nocardia brasiliensis ATCC 700358	1	14.5	7.18e-08	364	44-414 (414)	2-307 (310)
AF-A0A0R4J3Y7-F1-model_v4	WAT1-related protein	Glycine max	1	14.7	3.85e-08	364	38-414 (414)	2-350 (367)
AF-B4FEN0-F1-model_v4	Glucose-6-phosphate/phosphate translocator 2	Zea mays	1	13.7	3.45e-09	364	1-394 (414)	47-383 (387)
AF-K7M620-F1-model_v4	Uncharacterized protein	Glycine max	1	20.4	1.17e-09	363	68-383 (414)	12-386 (387)
AF-Q94B38-F1-model_v4	Glucose-6-phosphate/phosphate translocator 2, chloroplastic	Arabidopsis thaliana	1	13.1	5.23e-09	363	1-394 (414)	51-384 (388)
AF-I1JJ68-F1-model_v4	TPT domain-containing protein	Glycine max	1	13.6	2.81e-09	363	1-398 (414)	64-395 (395)
AF-I1N5H8-F1-model_v4	TPT domain-containing protein	Glycine max	1	13.3	8.27e-09	363	1-404 (414)	53-406 (408)
AF-C0P317-F1-model_v4	Phosphoenolpyruvate/phosphate translocator 1 chloroplastic	Zea mays	1	14	4.62e-09	362	1-414 (414)	49-395 (395)
AF-Q8ZNT2-F1-model_v4	Putative permease	Salmonella enterica subsp. enterica serovar Typhimurium str. LT2	1	16.6	1.13e-07	361	49-414 (414)	6-303 (306)
AF-Q8VE96-F1-model_v4	Solute carrier family 35 member F6	Mus musculus	1	14.9	8.62e-09	361	48-404 (414)	7-349 (372)
AF-A0A0H5SCK6-F1-model_v4	BMA-NSTP-5	Brugia malayi	1	12.1	3.26e-08	361	30-395 (414)	3-358 (385)
AF-A0A1D6IDP4-F1-model_v4	Glucose-6-phosphate/phosphate translocator 2	Zea mays	1	13.2	3.75e-09	361	1-394 (414)	64-387 (391)
AF-Q9HV25-F1-model_v4	Uncharacterized protein	Pseudomonas aeruginosa PAO1	1	13.4	2.3e-07	360	49-403 (414)	8-295 (296)
AF-Q9FZ96-F1-model_v4	Purine permease 1	Arabidopsis thaliana	1	12.1	3.26e-08	360	47-414 (414)	2-344 (356)
AF-Q93890-F1-model_v4	UDP-galactose/UDP-N-acetylglucosamine transporter srf-3	Caenorhabditis elegans	1	11	1.98e-08	360	1-412 (414)	2-361 (368)
AF-B2RYK5-F1-model_v4	RCG22880, isoform CRA_a	Rattus norvegicus	1	15.4	4.43e-09	359	1-414 (414)	1-360 (392)
AF-I1M6U7-F1-model_v4	TPT domain-containing protein	Glycine max	1	12.3	4.43e-09	358	1-398 (414)	62-395 (395)
AF-Q8CD26-F1-model_v4	Solute carrier family 35 member E1	Mus musculus	1	16.2	8.62e-09	358	22-411 (414)	5-351 (409)
AF-Q802Y0-F1-model_v4	Solute carrier family 35 member E1	Danio rerio	1	14.6	1.61e-08	357	45-412 (414)	10-322 (375)
AF-Q9I214-F1-model_v4	Uncharacterized protein	Pseudomonas aeruginosa PAO1	1	15.7	3.48e-07	356	49-405 (414)	4-295 (296)
AF-Q8K3D6-F1-model_v4	Solute carrier family 35 member E4	Mus musculus	1	12.1	4.18e-08	356	1-414 (414)	3-348 (351)
AF-B4FET6-F1-model_v4	ATPUP3	Zea mays	1	13.1	4.94e-08	355	28-407 (414)	2-347 (361)
AF-Q84QU8-F1-model_v4	Phosphoenolpyruvate/phosphate translocator 2, chloroplastic	Oryza sativa Japonica Group	1	15	2.65e-08	355	1-414 (414)	35-407 (407)
AF-I1JGW8-F1-model_v4	Uncharacterized protein	Glycine max	1	10.2	4.01e-08	354	43-414 (414)	2-337 (344)
AF-I1JV99-F1-model_v4	Uncharacterized protein	Glycine max	1	12.5	6.34e-08	354	31-407 (414)	1-343 (357)
AF-P0C6B1-F1-model_v4	Solute carrier family 35 member E1	Rattus norvegicus	1	14	9.36e-09	354	3-412 (414)	1-352 (409)
AF-Q9R0M8-F1-model_v4	UDP-galactose translocator	Mus musculus	1	14.9	5.45e-09	353	1-408 (414)	1-354 (390)
AF-A0A0R0FZY1-F1-model_v4	TPT domain-containing protein	Glycine max	1	13.3	7.61e-09	353	1-394 (414)	38-387 (391)
AF-Q8C811-F1-model_v4	Solute carrier family 35 member E2A	Mus musculus	1	14.3	6.71e-09	353	1-414 (414)	18-389 (405)
AF-B4FGI4-F1-model_v4	Nucleotide/sugar transporter family protein	Zea mays	1	16.7	1.68e-08	352	37-414 (414)	2-314 (340)
AF-B6TWA3-F1-model_v4	ATPUP5	Zea mays	1	13.5	1.61e-08	352	1-401 (414)	2-374 (376)
AF-K7UYA0-F1-model_v4	Putative purine permease 11	Zea mays	1	12.4	3e-08	352	1-409 (414)	3-378 (384)
AF-D3YVE8-F1-model_v4	Solute carrier family 35 member G2	Mus musculus	1	12.1	1.61e-08	352	18-414 (414)	66-412 (412)
AF-A0A0D2H3Z0-F1-model_v4	Unplaced genomic scaffold supercont1.4, whole genome shotgun sequence	Fonsecaea pedrosoi CBS 271.37	1	13	2.1e-09	351	1-414 (414)	69-478 (539)
AF-Q8H0T6-F1-model_v4	Phosphoenolpyruvate/phosphate translocator 2, chloroplastic	Arabidopsis thaliana	1	13.9	1.82e-08	350	1-414 (414)	31-383 (383)
AF-U7PJY2-F1-model_v4	TPT domain-containing protein	Sporothrix schenckii ATCC 58251	1	14	2.81e-09	350	1-413 (414)	80-491 (583)
AF-P31125-F1-model_v4	Probable amino-acid metabolite efflux pump	Escherichia coli K-12	1	14	5.74e-07	349	51-408 (414)	5-299 (299)
AF-P0AA70-F1-model_v4	Uncharacterized inner membrane transporter YedA	Escherichia coli K-12	1	15.4	2.95e-07	349	49-413 (414)	6-302 (306)
AF-A0A044TQJ2-F1-model_v4	Uncharacterized protein	Onchocerca volvulus	1	10.3	8.13e-08	349	33-395 (414)	10-355 (382)
AF-A0A0R0I3V1-F1-model_v4	Uncharacterized protein	Glycine max	1	12.9	1.61e-08	348	1-414 (414)	3-397 (407)
AF-K0EXU9-F1-model_v4	Uncharacterized protein	Nocardia brasiliensis ATCC 700358	1	15.3	7.18e-08	347	48-414 (414)	2-304 (316)
AF-A0A1D6PIK9-F1-model_v4	Purine permease 3	Zea mays	1	11.8	3.69e-08	347	10-407 (414)	2-359 (376)
AF-A0A0K0DS20-F1-model_v4	Uncharacterized protein	Strongyloides stercoralis	1	11.3	1.42e-08	347	1-407 (414)	84-471 (473)
AF-A0A0N4UIE2-F1-model_v4	TPT domain-containing protein	Dracunculus medinensis	1	12.2	1.34e-07	346	26-414 (414)	11-352 (374)
AF-C0PMH6-F1-model_v4	TPT domain-containing protein	Zea mays	1	14	7e-09	346	1-394 (414)	54-390 (394)
AF-A0A0R0GB26-F1-model_v4	Uncharacterized protein	Glycine max	1	13.1	2.44e-08	346	16-414 (414)	23-389 (404)
AF-A0A3P7DWA0-F1-model_v4	TPT domain-containing protein	Wuchereria bancrofti	1	11.2	1.04e-07	344	25-414 (414)	15-342 (353)
AF-A0A0H5SLW9-F1-model_v4	BMA-NSTP-2	Brugia malayi	1	12.5	4.54e-08	344	16-407 (414)	3-358 (361)
AF-Q9LFN3-F1-model_v4	Probable sugar phosphate/phosphate translocator At5g11230	Arabidopsis thaliana	1	11.9	8.84e-08	343	28-407 (414)	2-318 (351)
AF-A0A0K0EL79-F1-model_v4	TPT domain-containing protein	Strongyloides stercoralis	1	11.2	3.4e-08	343	22-413 (414)	1-348 (352)
AF-I1KCF1-F1-model_v4	TPT domain-containing protein	Glycine max	1	13.7	1.25e-08	343	1-411 (414)	74-405 (406)
AF-Q9I3T3-F1-model_v4	Uncharacterized protein	Pseudomonas aeruginosa PAO1	1	15.9	2.4e-07	342	49-405 (414)	7-303 (303)
AF-A0A1D6ERL9-F1-model_v4	PUP1	Zea mays	1	15.1	1.04e-07	342	60-414 (414)	2-331 (337)
AF-Q9FZ95-F1-model_v4	Purine permease 3	Arabidopsis thaliana	1	14	1.28e-07	342	47-407 (414)	2-331 (351)
AF-Q2M3R5-F1-model_v4	Solute carrier family 35 member G1	Homo sapiens	1	12.8	5.59e-08	342	1-402 (414)	28-364 (365)
AF-D3ZMU0-F1-model_v4	Solute carrier family 35, member G1	Rattus norvegicus	1	13.5	1.13e-07	342	1-401 (414)	32-366 (367)
AF-B4FNY5-F1-model_v4	WAT1-related protein	Zea mays	1	13.1	6.34e-08	342	31-412 (414)	1-344 (377)
AF-B7E3F9-F1-model_v4	Os09g0557500 protein	Oryza sativa Japonica Group	1	11.2	4.54e-08	342	1-403 (414)	1-385 (388)
AF-Q69SA2-F1-model_v4	WAT1-related protein	Oryza sativa Japonica Group	1	14.8	5.59e-08	341	47-411 (414)	4-343 (364)
AF-Q6ZJN0-F1-model_v4	Os08g0104900 protein	Oryza sativa Japonica Group	1	12.3	4.18e-08	340	36-414 (414)	2-322 (337)
AF-F4IHS9-F1-model_v4	UDP-xylose transporter 1	Arabidopsis thaliana	1	15.1	5.37e-08	340	35-409 (414)	2-309 (342)
AF-I1JUD7-F1-model_v4	TPT domain-containing protein	Glycine max	1	12.3	2.4e-07	340	45-411 (414)	12-322 (346)
AF-I1LT42-F1-model_v4	Uncharacterized protein	Glycine max	1	11.2	7.18e-08	340	11-400 (414)	1-362 (363)
AF-B4FB20-F1-model_v4	WAT1-related protein	Zea mays	1	14.1	7.8e-08	340	51-413 (414)	11-352 (365)
AF-A0A044RZF9-F1-model_v4	TPT domain-containing protein	Onchocerca volvulus	1	11.7	6.34e-08	340	27-411 (414)	25-354 (366)
AF-Q5F7Y1-F1-model_v4	Membrane protein	Neisseria gonorrhoeae FA 1090	1	13.9	4.11e-07	339	48-401 (414)	6-306 (307)
AF-I1J5C1-F1-model_v4	WAT1-related protein	Glycine max	1	16.1	1.9e-08	339	32-414 (414)	1-346 (347)
AF-K7VUU6-F1-model_v4	WAT1-related protein	Zea mays	1	14.4	9.21e-08	339	39-413 (414)	2-353 (381)
AF-K7V892-F1-model_v4	Putative purine permease 4	Zea mays	1	14.1	2.44e-08	339	16-410 (414)	1-364 (385)
AF-P29370-F1-model_v4	Uncharacterized protein PA1977	Pseudomonas aeruginosa PAO1	1	13.7	2.95e-07	338	50-406 (414)	5-286 (287)
AF-A0A1D6JR39-F1-model_v4	Purine permease 3	Zea mays	1	12.1	1.68e-08	338	1-407 (414)	4-370 (387)
AF-Q5M7A3-F1-model_v4	Solute carrier family 35 member G2	Rattus norvegicus	1	11.5	3.85e-08	338	18-414 (414)	66-412 (412)
AF-A0A1D6ENR0-F1-model_v4	Plastid phosphate/phosphoenolpyruvate translocator1	Zea mays	1	13.3	1.54e-08	338	1-414 (414)	23-431 (431)
AF-O94695-F1-model_v4	Putative transporter C83.11	Schizosaccharomyces pombe 972h-	1	13.7	2.34e-08	338	33-407 (414)	4-323 (449)
AF-U7PYF7-F1-model_v4	TPT domain-containing protein	Sporothrix schenckii ATCC 58251	1	14.3	2.65e-08	337	1-404 (414)	1-358 (358)
AF-G4LWI0-F1-model_v4	Sugar transporter, putative	Schistosoma mansoni	1	11.7	4.36e-08	337	34-413 (414)	2-363 (363)
AF-Q32BE9-F1-model_v4	Uncharacterized protein	Shigella dysenteriae Sd197	1	16	1.13e-07	336	48-414 (414)	5-318 (321)
AF-Q6K225-F1-model_v4	Os02g0628200 protein	Oryza sativa Japonica Group	1	16.1	8.84e-08	336	48-409 (414)	5-307 (341)
AF-I1MA53-F1-model_v4	WAT1-related protein	Glycine max	1	11.3	1e-07	336	34-414 (414)	5-349 (363)
AF-Q9FGL0-F1-model_v4	WAT1-related protein At5g47470	Arabidopsis thaliana	1	15.6	1.28e-07	336	34-414 (414)	14-364 (364)
AF-C0PMB1-F1-model_v4	WAT1-related protein	Zea mays	1	14.1	2.6e-07	336	31-414 (414)	1-339 (366)
AF-Q8DN53-F1-model_v4	Uncharacterized protein	Streptococcus pneumoniae R6	1	14	8.84e-08	336	24-401 (414)	50-376 (377)
AF-I1MTG4-F1-model_v4	TPT domain-containing protein	Glycine max	1	13.9	3.13e-08	336	1-412 (414)	37-382 (382)
AF-Q5QLF2-F1-model_v4	Os01g0680200 protein	Oryza sativa Japonica Group	1	13.5	2.34e-08	336	17-414 (414)	3-372 (387)
AF-A0A0K0DS19-F1-model_v4	Uncharacterized protein	Strongyloides stercoralis	1	9.5	2.54e-08	336	19-408 (414)	26-417 (417)
AF-K7M219-F1-model_v4	Uncharacterized protein	Glycine max	1	11.5	3.85e-08	336	1-413 (414)	13-407 (420)
AF-B7EL20-F1-model_v4	Os06g0153200 protein	Oryza sativa Japonica Group	1	16.1	2.44e-08	336	1-414 (414)	31-411 (431)
AF-K7LM76-F1-model_v4	Uncharacterized protein	Glycine max	1	13.3	8.13e-08	335	47-411 (414)	11-329 (329)
AF-C0PCW8-F1-model_v4	Nucleotide/sugar transporter family protein	Zea mays	1	15.8	1.02e-08	335	36-414 (414)	4-316 (354)
AF-A0A0R0LDT4-F1-model_v4	WAT1-related protein	Glycine max	1	12	2.12e-07	335	47-414 (414)	8-343 (367)
AF-A0A0K0E4M3-F1-model_v4	TPT domain-containing protein	Strongyloides stercoralis	1	16.7	5.15e-08	334	51-411 (414)	4-315 (333)
AF-G5EBK5-F1-model_v4	F44C8.7-like protein	Caenorhabditis elegans	1	12.5	1.58e-07	334	33-394 (414)	14-329 (351)
AF-O49726-F1-model_v4	Purine permease 21	Arabidopsis thaliana	1	10.5	4.94e-08	334	2-414 (414)	1-377 (390)
AF-Q9LU76-F1-model_v4	Nucleotide-sugar uncharacterized transporter 1	Arabidopsis thaliana	1	13.1	6.89e-08	334	26-409 (414)	46-362 (390)
AF-Q94EI9-F1-model_v4	Probable sugar phosphate/phosphate translocator At3g14410	Arabidopsis thaliana	1	13.2	1.23e-07	333	32-414 (414)	1-324 (340)
AF-P39542-F1-model_v4	Uncharacterized transporter YJL193W	Saccharomyces cerevisiae S288C	1	13.4	8.27e-09	333	39-410 (414)	3-402 (402)
AF-Q8BY79-F1-model_v4	Solute carrier family 35 member G1	Mus musculus	1	14.5	1.28e-07	332	1-402 (414)	24-367 (368)
AF-A0A1D6KCL0-F1-model_v4	WAT1-related protein	Zea mays	1	14	6.89e-08	332	50-413 (414)	5-340 (370)
AF-A0A0R0JFA6-F1-model_v4	WAT1-related protein	Glycine max	1	10.8	1.13e-07	332	31-414 (414)	1-350 (392)
AF-K7LVI6-F1-model_v4	TPT domain-containing protein	Glycine max	1	15	4.54e-08	331	35-414 (414)	2-319 (349)
AF-Q8TBE7-F1-model_v4	Solute carrier family 35 member G2	Homo sapiens	1	11.9	3.54e-08	331	1-414 (414)	34-412 (412)
AF-Q69U97-F1-model_v4	Os08g0540000 protein	Oryza sativa Japonica Group	1	12.9	6.89e-08	330	25-407 (414)	1-331 (344)
AF-I1M4J5-F1-model_v4	TPT domain-containing protein	Glycine max	1	14.7	3.85e-08	330	35-414 (414)	2-314 (349)
AF-A0A1D6LI23-F1-model_v4	WAT1-related protein	Zea mays	1	12.2	6.61e-08	330	47-414 (414)	6-347 (352)
AF-A0A044RA72-F1-model_v4	TPT domain-containing protein	Onchocerca volvulus	1	14.2	1.75e-08	330	33-413 (414)	3-323 (387)
AF-A0A3P7FLQ7-F1-model_v4	TPT domain-containing protein	Wuchereria bancrofti	1	16.5	3.85e-08	330	40-414 (414)	2-322 (387)
AF-C6TK44-F1-model_v4	TPT domain-containing protein	Glycine max	1	11.8	3.13e-08	330	1-411 (414)	53-395 (396)
AF-A0A096QY66-F1-model_v4	Phosphoenolpyruvate/phosphate translocator 2 chloroplastic	Zea mays	1	13.8	5.83e-08	330	1-401 (414)	43-408 (415)
AF-Q6F2N6-F1-model_v4	Os05g0444300 protein	Oryza sativa Japonica Group	1	13.7	3.26e-08	329	34-414 (414)	4-329 (354)
AF-I1KDD3-F1-model_v4	Uncharacterized protein	Glycine max	1	10.2	2.4e-07	329	22-399 (414)	4-358 (361)
AF-Q7X6H1-F1-model_v4	Os04g0587300 protein	Oryza sativa Japonica Group	1	10.9	7.18e-08	329	1-414 (414)	4-375 (376)
AF-A0A0H3GQD9-F1-model_v4	Putative transmembrane protein	Klebsiella pneumoniae subsp. pneumoniae HS11286	1	15	6.23e-07	328	49-413 (414)	6-296 (303)
AF-B2RYM9-F1-model_v4	Slc35c2 protein	Rattus norvegicus	1	14.7	6.08e-08	328	32-414 (414)	1-332 (364)
AF-P0ABT8-F1-model_v4	Probable cystine transporter YijE	Escherichia coli K-12	1	15.6	1.52e-07	327	49-393 (414)	9-288 (301)
AF-A0A044TLL6-F1-model_v4	TPT domain-containing protein	Onchocerca volvulus	1	14.4	2.95e-07	327	36-407 (414)	2-327 (352)
AF-I1MGS5-F1-model_v4	Uncharacterized protein	Glycine max	1	14.8	1.09e-07	327	44-410 (414)	20-345 (358)
AF-F4KHA8-F1-model_v4	WAT1-related protein At5g40230	Arabidopsis thaliana	1	10	4.29e-07	327	31-414 (414)	1-356 (370)
AF-I1LYG5-F1-model_v4	TPT domain-containing protein	Glycine max	1	10.6	2.4e-07	327	47-413 (414)	5-314 (381)
AF-A0A0R0F6T6-F1-model_v4	TPT domain-containing protein	Glycine max	1	12.8	8.13e-08	327	1-405 (414)	28-397 (604)
AF-Q0PA30-F1-model_v4	Putative integral membrane protein	Campylobacter jejuni subsp. jejuni NCTC 11168 = ATCC 700819	1	12.4	1.43e-06	325	51-398 (414)	2-288 (290)
AF-Q8I420-F1-model_v4	Triose phosphate transporter	Plasmodium falciparum 3D7	1	11.6	2.83e-07	325	25-395 (414)	1-341 (342)
AF-Q8GUJ1-F1-model_v4	UDP-xylose transporter 2	Arabidopsis thaliana	1	15.5	2.88e-08	325	31-407 (414)	1-307 (353)
AF-A0A1D6LZN4-F1-model_v4	Phosphoenolpyruvate/phosphate translocator 2 chloroplastic	Zea mays	1	15.2	5.37e-08	325	1-413 (414)	82-427 (427)
AF-B2GUZ8-F1-model_v4	Slc35e3 protein	Rattus norvegicus	1	11.8	6.23e-07	324	29-411 (414)	1-312 (313)
AF-A0A1D6I1I2-F1-model_v4	Plastid phosphate/phosphoenolpyruvate translocator2	Zea mays	1	13.4	2.06e-08	324	1-414 (414)	35-422 (422)
AF-A0A0H3GPN1-F1-model_v4	O-acetylserine/cysteine export protein	Klebsiella pneumoniae subsp. pneumoniae HS11286	1	14.7	9.85e-07	323	51-397 (414)	5-288 (299)
AF-Q8N808-F1-model_v4	Solute carrier family 35 member G3	Homo sapiens	1	12.1	2.4e-07	323	10-408 (414)	2-338 (338)
AF-I1K105-F1-model_v4	Uncharacterized protein	Glycine max	1	11.3	2.3e-07	323	30-407 (414)	7-350 (364)
AF-O49725-F1-model_v4	Probable purine permease 10	Arabidopsis thaliana	1	11.1	1e-07	323	29-414 (414)	12-379 (390)
AF-A0A1D6NFS3-F1-model_v4	Putative purine permease 4	Zea mays	1	13.8	4.94e-08	323	1-414 (414)	1-377 (396)
AF-C1HDX4-F1-model_v4	DUF250 domain-containing protein	Paracoccidioides lutzii Pb01	1	12.8	3e-08	323	1-414 (414)	98-517 (640)
AF-Q9LPF6-F1-model_v4	Probable purine permease 11	Arabidopsis thaliana	1	15	5.15e-08	322	3-412 (414)	1-371 (379)
AF-Q2RAS8-F1-model_v4	Os11g0139400 protein	Oryza sativa Japonica Group	1	14.9	1.75e-08	322	1-407 (414)	6-360 (388)
AF-K0ELG1-F1-model_v4	Putative amino-acid metabolite efflux pump	Nocardia brasiliensis ATCC 700358	1	10.6	1.03e-06	321	51-414 (414)	8-311 (320)
AF-A0A0K0EHU6-F1-model_v4	Uncharacterized protein	Strongyloides stercoralis	1	14.6	1.23e-07	321	34-414 (414)	7-327 (328)
AF-P87041-F1-model_v4	UDP-galactose transporter	Schizosaccharomyces pombe 972h-	1	11.3	9.6e-08	321	44-394 (414)	16-323 (353)
AF-A0A1P6C3B9-F1-model_v4	"BMA-SRF-3, isoform d	Brugia malayi	1	10	2.83e-07	321	30-393 (414)	22-361 (363)
AF-A0A1D6FHC0-F1-model_v4	Triose phosphate/phosphate translocator, chloroplastic	Zea mays	1	11.5	2.54e-08	321	1-408 (414)	60-405 (405)
AF-P49133-F1-model_v4	Triose phosphate/phosphate translocator, chloroplastic	Zea mays	1	11.5	2.76e-08	321	1-408 (414)	65-409 (409)
AF-O96200-F1-model_v4	GDP-fructose:GMP antiporter, putative	Plasmodium falciparum 3D7	1	10.1	5.98e-07	320	44-408 (414)	3-311 (311)
AF-K7KLM7-F1-model_v4	TPT domain-containing protein	Glycine max	1	14.8	5.83e-08	320	31-412 (414)	1-316 (345)
AF-Q9SKJ7-F1-model_v4	Probable sugar phosphate/phosphate translocator At2g25520	Arabidopsis thaliana	1	12.8	2.5e-07	320	29-407 (414)	5-322 (347)
AF-Q3E6T0-F1-model_v4	Probable sugar phosphate/phosphate translocator At5g25400	Arabidopsis thaliana	1	12	4.29e-07	320	30-414 (414)	6-326 (349)
AF-Q8VCX2-F1-model_v4	Solute carrier family 35 member C2	Mus musculus	1	14.8	1e-07	320	36-401 (414)	2-322 (364)
AF-O76865-F1-model_v4	EG:100G10.5 protein	Drosophila melanogaster	1	11.7	6.34e-08	320	1-400 (414)	1-348 (368)
AF-A0A0P0UZM2-F1-model_v4	WAT1-related protein	Oryza sativa Japonica Group	1	13.7	3.79e-07	320	51-411 (414)	6-343 (376)
AF-I1MSJ6-F1-model_v4	TPT domain-containing protein	Glycine max	1	13.8	1.65e-07	320	29-414 (414)	16-362 (378)
AF-I1MC70-F1-model_v4	WAT1-related protein	Glycine max	1	10.1	3.63e-07	320	23-414 (414)	1-374 (389)
AF-I1N0B3-F1-model_v4	Uncharacterized protein	Glycine max	1	12.3	5.83e-08	320	1-414 (414)	19-406 (414)
AF-K7V6V0-F1-model_v4	Putative sugar phosphate/phosphate translocator	Zea mays	1	14.4	5.83e-08	320	1-414 (414)	23-410 (431)
AF-Q8I0U9-F1-model_v4	Phosphoenolpyruvate/phosphate translocator	Plasmodium falciparum 3D7	1	10.3	4.94e-08	320	1-399 (414)	155-522 (524)
AF-Q9I4R4-F1-model_v4	Uncharacterized protein	Pseudomonas aeruginosa PAO1	1	12.7	2.56e-06	319	47-393 (414)	4-286 (301)
AF-A0A0H3GW41-F1-model_v4	Putative metabolite transporter	Klebsiella pneumoniae subsp. pneumoniae HS11286	1	12.8	1.32e-06	319	51-393 (414)	5-288 (302)
AF-O30646-F1-model_v4	Protein PagO	Salmonella enterica subsp. enterica serovar Typhimurium str. LT2	1	10.9	1.03e-06	319	48-414 (414)	2-300 (304)
AF-G5EC08-F1-model_v4	TPT domain-containing protein	Caenorhabditis elegans	1	16	3.48e-07	319	47-407 (414)	2-315 (317)
AF-C0PH79-F1-model_v4	Nucleotide/sugar transporter family protein	Zea mays	1	15.7	6.34e-08	319	31-408 (414)	1-306 (340)
AF-A0A1D6E5I8-F1-model_v4	GDP-mannose transporter GONST5	Zea mays	1	11.9	1.13e-07	319	47-411 (414)	12-321 (344)
AF-I1KZI2-F1-model_v4	Uncharacterized protein	Glycine max	1	12.6	1.65e-07	319	47-414 (414)	12-315 (346)
AF-A0A158N836-F1-model_v4	Uncharacterized protein	Onchocerca volvulus	1	11.2	8e-07	319	33-407 (414)	6-335 (347)
AF-Q9LPU2-F1-model_v4	UDP-rhamnose/UDP-galactose transporter 2	Arabidopsis thaliana	1	13.5	1.34e-07	319	15-414 (414)	2-320 (348)
AF-Q32HJ3-F1-model_v4	Putative transmembrane subunit	Shigella dysenteriae Sd197	1	14.7	1.56e-06	318	49-413 (414)	6-302 (306)
AF-Q7Z769-F1-model_v4	Solute carrier family 35 member E3	Homo sapiens	1	10.9	1.21e-06	318	36-410 (414)	2-311 (313)
AF-F4JK59-F1-model_v4	WAT1-related protein At4g15540	Arabidopsis thaliana	1	13.9	1.65e-07	318	33-414 (414)	3-345 (347)
AF-Q9HV29-F1-model_v4	Uncharacterized protein	Pseudomonas aeruginosa PAO1	1	13.4	1.34e-07	317	51-414 (414)	5-297 (297)
AF-C6TH78-F1-model_v4	TPT domain-containing protein	Glycine max	1	12.3	2.83e-07	317	29-414 (414)	1-341 (345)
AF-A0A0R0KNW8-F1-model_v4	WAT1-related protein	Glycine max	1	11.3	3.63e-07	317	31-414 (414)	1-350 (397)
AF-A0A1C1CB14-F1-model_v4	Putative transporter	Cladophialophora carrionii	1	12	1.61e-08	317	1-414 (414)	61-487 (510)
AF-Q9C521-F1-model_v4	UDP-galactose transporter 1	Arabidopsis thaliana	1	13.5	1.45e-07	316	46-401 (414)	4-304 (336)
AF-C6TIF5-F1-model_v4	WAT1-related protein	Glycine max	1	13.3	1.58e-07	316	45-414 (414)	4-343 (350)
AF-Q9SUV2-F1-model_v4	Probable sugar phosphate/phosphate translocator At4g32390	Arabidopsis thaliana	1	12.5	2.4e-07	316	29-407 (414)	1-322 (350)
AF-C4J5Y9-F1-model_v4	Putative sugar phosphate/phosphate translocator	Zea mays	1	13.1	1.4e-07	316	10-411 (414)	1-329 (355)
AF-Q9SY29-F1-model_v4	Probable purine permease 4	Arabidopsis thaliana	1	13	1.18e-07	316	26-414 (414)	1-360 (382)
AF-Q9LF61-F1-model_v4	Xylulose 5-phosphate/phosphate translocator, chloroplastic	Arabidopsis thaliana	1	13.2	4.54e-08	316	1-412 (414)	65-417 (417)
AF-B4FVJ1-F1-model_v4	Plastidic phosphate translocator-like protein1	Zea mays	1	12.9	9.6e-08	315	21-411 (414)	2-331 (357)
AF-K7MUJ0-F1-model_v4	Uncharacterized protein	Glycine max	1	13.4	1.45e-07	315	13-414 (414)	1-364 (365)
AF-K0EZQ0-F1-model_v4	Uncharacterized protein	Nocardia brasiliensis ATCC 700358	1	12.1	2.46e-06	314	49-414 (414)	2-314 (317)
AF-I1N5F0-F1-model_v4	Uncharacterized protein	Glycine max	1	13.4	2.6e-07	314	47-414 (414)	12-315 (346)
AF-B4FV49-F1-model_v4	WAT1-related protein	Zea mays	1	13.9	9.45e-07	314	51-412 (414)	11-349 (363)
AF-K7ME91-F1-model_v4	TPT domain-containing protein	Glycine max	1	12.5	3.13e-08	314	7-408 (414)	78-418 (418)
AF-A0A0H3GYQ5-F1-model_v4	Putative transmembrane protein	Klebsiella pneumoniae subsp. pneumoniae HS11286	1	13.2	4.4e-06	313	51-406 (414)	2-297 (298)
AF-I1NF67-F1-model_v4	WAT1-related protein	Glycine max	1	12.7	9.06e-07	313	41-407 (414)	2-334 (346)
AF-A0A0K0DVG3-F1-model_v4	Uncharacterized protein	Strongyloides stercoralis	1	14.8	4.11e-07	313	47-413 (414)	25-347 (356)
AF-I1NBH1-F1-model_v4	TPT domain-containing protein	Glycine max	1	11.2	6.77e-07	313	34-407 (414)	9-328 (385)
AF-Q94AP3-F1-model_v4	Protein WALLS ARE THIN 1	Arabidopsis thaliana	1	10.7	3.63e-07	313	53-414 (414)	22-369 (389)
AF-A0A2K6VW95-F1-model_v4	Uncharacterized protein	Onchocerca volvulus	1	11.2	1.13e-07	313	1-414 (414)	1-370 (422)
AF-Q9VZP2-F1-model_v4	FI19868p1	Drosophila melanogaster	1	11.3	2.83e-07	313	1-407 (414)	9-398 (469)
AF-A0A1D6GTL0-F1-model_v4	EamA-like transporter family	Zea mays	1	30	2.65e-08	312	174-414 (414)	2-251 (267)
AF-K0F263-F1-model_v4	Uncharacterized protein	Nocardia brasiliensis ATCC 700358	1	13	1.16e-06	312	50-392 (414)	4-276 (317)
AF-C4J1Q6-F1-model_v4	WAT1-related protein	Zea mays	1	11.1	1.37e-06	312	50-412 (414)	6-337 (346)
AF-Q5VS70-F1-model_v4	WAT1-related protein	Oryza sativa Japonica Group	1	11.6	9.85e-07	312	28-407 (414)	3-335 (346)
AF-B6TD27-F1-model_v4	Plastidic phosphate translocator-like protein1	Zea mays	1	12.3	1.23e-07	312	22-414 (414)	2-354 (357)
AF-B7F9F1-F1-model_v4	WAT1-related protein	Oryza sativa Japonica Group	1	10.8	7.67e-07	312	51-414 (414)	10-359 (374)
AF-Q7X7S4-F1-model_v4	Os04g0587400 protein	Oryza sativa Japonica Group	1	11.4	1.18e-07	312	16-413 (414)	45-400 (408)
AF-O44166-F1-model_v4	Nucleotide Sugar TransPorter family	Caenorhabditis elegans	1	13.5	7.06e-07	311	49-410 (414)	2-324 (324)
AF-I1LZZ2-F1-model_v4	TPT domain-containing protein	Glycine max	1	12.5	6.23e-07	311	29-412 (414)	1-319 (344)
AF-I1KAK1-F1-model_v4	WAT1-related protein	Glycine max	1	14.8	1.13e-07	311	37-407 (414)	2-341 (360)
AF-Q60EU8-F1-model_v4	Os05g0241200 protein	Oryza sativa Japonica Group	1	11.8	7.48e-08	311	1-407 (414)	46-402 (404)
AF-P71360-F1-model_v4	Uncharacterized transporter HI_0878	Haemophilus influenzae Rd KW20	1	13.2	1.37e-06	310	49-401 (414)	6-302 (306)
AF-Q7XKA0-F1-model_v4	Os04g0692000 protein	Oryza sativa Japonica Group	1	11.6	1.04e-07	310	24-414 (414)	1-319 (350)
AF-O17106-F1-model_v4	Nucleotide Sugar TransPorter family	Caenorhabditis elegans	1	11.2	7.06e-07	310	34-395 (414)	17-332 (356)
AF-B6T7V1-F1-model_v4	WAT1-related protein	Zea mays	1	13	6.23e-07	310	51-414 (414)	7-338 (373)
AF-Q9N3S9-F1-model_v4	TPT domain-containing protein	Caenorhabditis elegans	1	13	1e-07	310	1-414 (414)	1-393 (410)
AF-B0V0X3-F1-model_v4	Solute carrier family 35 member G2a	Danio rerio	1	11.4	5.59e-08	310	5-414 (414)	63-415 (415)
AF-Q9FTT3-F1-model_v4	Triose phosphate/phosphate translocator TPT, chloroplastic	Oryza sativa Japonica Group	1	11.2	3.85e-08	310	1-408 (414)	74-417 (417)
AF-I1K8W1-F1-model_v4	TPT domain-containing protein	Glycine max	1	12.8	2.6e-07	309	30-411 (414)	6-322 (346)
AF-I1LF77-F1-model_v4	WAT1-related protein	Glycine max	1	12.2	1.26e-06	309	41-407 (414)	2-334 (347)
AF-I1JNA6-F1-model_v4	TPT domain-containing protein	Glycine max	1	13.2	1.79e-07	309	1-404 (414)	8-348 (348)
AF-I1JYW8-F1-model_v4	WAT1-related protein	Glycine max	1	13.5	4.86e-07	309	50-414 (414)	4-341 (350)
AF-I1KBA0-F1-model_v4	TPT domain-containing protein	Glycine max	1	15.2	6.61e-08	309	31-414 (414)	1-327 (351)
AF-Q9AS84-F1-model_v4	Os01g0167500 protein	Oryza sativa Japonica Group	1	13.8	1e-07	309	32-399 (414)	1-300 (356)
AF-O01879-F1-model_v4	Nucleotide Sugar TransPorter family	Caenorhabditis elegans	1	9.4	1.23e-07	308	35-414 (414)	2-343 (344)
AF-Q65X78-F1-model_v4	Os05g0494500 protein	Oryza sativa Japonica Group	1	13.1	2.3e-07	308	24-409 (414)	1-330 (354)
AF-Q8RXL8-F1-model_v4	UDP-xylose transporter 3	Arabidopsis thaliana	1	15.5	7.48e-08	308	31-407 (414)	1-307 (357)
AF-B4FBK5-F1-model_v4	Putative sugar phosphate/phosphate translocator	Zea mays	1	13.1	2.4e-07	308	20-411 (414)	4-334 (360)
AF-A0A1D6QIZ6-F1-model_v4	Anthocyanin-related membrane protein 1 (Anm1)-like	Zea mays	1	14.2	1.79e-07	308	34-407 (414)	7-327 (376)
AF-K7TLN8-F1-model_v4	Putative sugar phosphate/phosphate translocator	Zea mays	1	11.7	1.18e-07	308	1-414 (414)	1-377 (383)
AF-C6TIS1-F1-model_v4	TPT domain-containing protein	Glycine max	1	10.9	2.72e-07	307	36-399 (414)	2-307 (345)
AF-A0A1D6M555-F1-model_v4	Solute carrier family 35 member F1	Zea mays	1	13.7	1.13e-07	307	40-414 (414)	2-319 (350)
AF-I1N0T4-F1-model_v4	TPT domain-containing protein	Glycine max	1	13.3	1.28e-07	307	1-414 (414)	99-482 (499)
AF-K7LCY1-F1-model_v4	TPT domain-containing protein	Glycine max	1	13.1	5.37e-08	307	1-414 (414)	114-500 (523)
AF-Q2G1P2-F1-model_v4	Uncharacterized protein	Staphylococcus aureus subsp. aureus NCTC 8325	1	14.6	2.5e-07	306	38-398 (414)	2-289 (290)
AF-A0A0H3GVA1-F1-model_v4	Uncharacterized protein	Klebsiella pneumoniae subsp. pneumoniae HS11286	1	12.9	2.26e-06	306	58-395 (414)	2-268 (296)
AF-Q9SFE9-F1-model_v4	GDP-mannose transporter GONST5	Arabidopsis thaliana	1	13.6	6.23e-07	306	35-414 (414)	2-325 (341)
AF-Q9NTN3-F1-model_v4	UDP-glucuronic acid/UDP-N-acetylgalactosamine transporter	Homo sapiens	1	12.4	3.34e-07	306	15-414 (414)	2-348 (355)
AF-Q9LNH5-F1-model_v4	Probable sugar phosphate/phosphate translocator At1g48230	Arabidopsis thaliana	1	11.7	5.74e-07	306	47-414 (414)	8-336 (367)
AF-A0A1D6HHH5-F1-model_v4	WAT1-related protein	Zea mays	1	12.4	5.28e-07	306	40-414 (414)	2-365 (393)
AF-Q8BGK5-F1-model_v4	Solute carrier family 35 member F1	Mus musculus	1	12.2	5.15e-08	306	1-414 (414)	8-381 (408)
AF-Q6I5W9-F1-model_v4	Os05g0215800 protein	Oryza sativa Japonica Group	1	13	1.52e-07	305	30-413 (414)	3-335 (335)
AF-Q10A36-F1-model_v4	WAT1-related protein	Oryza sativa Japonica Group	1	14.6	6.5e-07	305	25-414 (414)	1-358 (368)
AF-B4FHB5-F1-model_v4	WAT1-related protein	Zea mays	1	10.5	3.48e-07	305	1-407 (414)	1-362 (395)
AF-A0A1D6I662-F1-model_v4	Purine permease 3	Zea mays	1	14.8	1e-07	305	1-407 (414)	263-640 (657)
AF-O25832-F1-model_v4	Uncharacterized transporter HP_1234	Helicobacter pylori 26695	1	14	1.26e-06	304	46-404 (414)	3-297 (298)
AF-Q9FL08-F1-model_v4	WAT1-related protein At5g40240	Arabidopsis thaliana	1	12.5	7.36e-07	304	32-409 (414)	1-353 (368)
AF-I1LFM6-F1-model_v4	TPT domain-containing protein	Glycine max	1	12.2	6.77e-07	303	34-412 (414)	2-315 (345)
AF-I1KBA1-F1-model_v4	TPT domain-containing protein	Glycine max	1	14.5	1e-07	303	31-412 (414)	1-316 (345)
AF-I1LW90-F1-model_v4	WAT1-related protein	Glycine max	1	11.4	7.67e-07	303	34-414 (414)	5-348 (362)
AF-I1JYA5-F1-model_v4	TPT domain-containing protein	Glycine max	1	15	1.09e-07	302	31-407 (414)	1-307 (354)
AF-Q8S2F4-F1-model_v4	Os01g0802850 protein	Oryza sativa Japonica Group	1	13.9	2.6e-07	302	20-411 (414)	5-335 (361)
AF-I1K0Q7-F1-model_v4	WAT1-related protein	Glycine max	1	14	8e-07	302	33-414 (414)	11-361 (368)
AF-A0A0K0E8C7-F1-model_v4	Uncharacterized protein	Strongyloides stercoralis	1	12.6	1.21e-06	301	30-411 (414)	13-332 (334)
AF-A0A0R0KHL3-F1-model_v4	TPT domain-containing protein	Glycine max	1	10.9	3.63e-07	301	36-399 (414)	2-307 (345)
AF-Q65XI0-F1-model_v4	WAT1-related protein	Oryza sativa Japonica Group	1	14.9	3.63e-07	301	51-407 (414)	6-338 (384)
AF-I1KLP7-F1-model_v4	TPT domain-containing protein	Glycine max	1	11.2	5.15e-08	301	1-407 (414)	60-403 (406)
AF-Q9ZSR7-F1-model_v4	Triose phosphate/phosphate translocator TPT, chloroplastic	Arabidopsis thaliana	1	13.4	3.85e-08	301	1-407 (414)	63-408 (410)
AF-B4FDR4-F1-model_v4	Nucleotide sugar transporter-KT 1	Zea mays	1	15	1.65e-07	300	32-413 (414)	5-335 (335)
AF-K7KA43-F1-model_v4	WAT1-related protein	Glycine max	1	13.9	9.85e-07	300	33-413 (414)	13-357 (393)
AF-U7PP45-F1-model_v4	TPT domain-containing protein	Sporothrix schenckii ATCC 58251	1	14.4	2.12e-07	300	2-410 (414)	13-362 (396)
AF-C1HA95-F1-model_v4	Solute carrier family 35 member F2	Paracoccidioides lutzii Pb01	1	14.4	7.18e-08	300	1-414 (414)	17-417 (423)
AF-Q0JJB5-F1-model_v4	Os01g0749900 protein	Oryza sativa Japonica Group	1	14.2	8.84e-08	300	1-414 (414)	90-448 (471)
AF-Q5F297-F1-model_v4	Solute carrier family 35 member G3	Mus musculus	1	11.9	5.5e-07	299	1-408 (414)	3-340 (340)
AF-I1KAK2-F1-model_v4	WAT1-related protein	Glycine max	1	14.6	5.5e-07	299	36-414 (414)	2-362 (364)
AF-B4FTK8-F1-model_v4	WAT1-related protein	Zea mays	1	11.5	3.48e-07	299	31-402 (414)	1-337 (390)
AF-A0A1D6LL97-F1-model_v4	Putative sugar phosphate/phosphate translocator	Zea mays	1	15.1	3.85e-08	299	1-414 (414)	26-418 (437)
AF-A4I4E6-F1-model_v4	Eukaryotic_protein_of_uncharacterized_function_(D UF914)/EamA-like_transporter_family_-_putative	Leishmania infantum	1	13.2	7.48e-08	299	35-399 (414)	5-375 (452)
AF-A0A0K0EI61-F1-model_v4	Uncharacterized protein	Strongyloides stercoralis	1	11.5	6.23e-07	298	1-393 (414)	1-335 (344)
AF-Q20787-F1-model_v4	Adenosine 3'-phospho 5'-phosphosulfate transporter 2	Caenorhabditis elegans	1	12.8	7.06e-07	298	1-414 (414)	3-358 (364)
AF-Q0DJC9-F1-model_v4	Os05g0299500 protein	Oryza sativa Japonica Group	1	14	2.3e-07	298	29-414 (414)	1-327 (365)
AF-Q56072-F1-model_v4	Probable amino-acid metabolite efflux pump	Salmonella enterica subsp. enterica serovar Typhimurium str. LT2	1	12.7	6.66e-06	297	51-414 (414)	5-298 (299)
AF-B4FRG7-F1-model_v4	Nucleotide sugar transporter-KT 1	Zea mays	1	13.4	3.08e-07	297	2-393 (414)	1-307 (337)
AF-Q8RWW7-F1-model_v4	UDP-rhamnose/UDP-galactose transporter 4	Arabidopsis thaliana	1	13.5	6.5e-07	297	34-414 (414)	9-336 (337)
AF-A0A077Z835-F1-model_v4	Solute carrier family 35 member F5	Trichuris trichiura	1	23.2	3.13e-08	297	135-414 (414)	16-349 (370)
AF-K7V647-F1-model_v4	WAT1-related protein	Zea mays	1	14.8	1.03e-06	297	41-414 (414)	3-346 (373)
AF-Q4D8E3-F1-model_v4	UDP-glucuronic acid/UDP-N-acetylgalactosamine transporter, putative	Trypanosoma cruzi strain CL Brener	1	14.2	1.18e-07	297	13-412 (414)	3-389 (390)
AF-C0P0E0-F1-model_v4	DUF250 domain-containing protein	Histoplasma capsulatum G186AR	1	13	5.83e-08	297	1-410 (414)	114-509 (607)
AF-Q9I3Y4-F1-model_v4	EamA domain-containing protein	Pseudomonas aeruginosa PAO1	1	14	6.66e-06	296	32-414 (414)	1-291 (297)
AF-Q3UME2-F1-model_v4	Transmembrane protein 241	Mus musculus	1	11.6	3.57e-06	296	45-401 (414)	3-296 (297)
AF-I1K0J8-F1-model_v4	TPT domain-containing protein	Glycine max	1	17	1.65e-07	296	1-403 (414)	9-352 (354)
AF-A0A044T742-F1-model_v4	Uncharacterized protein	Onchocerca volvulus	1	11.9	8.69e-07	296	1-398 (414)	1-364 (365)
AF-K7MKR4-F1-model_v4	WAT1-related protein	Glycine max	1	12.5	6.08e-08	296	40-413 (414)	2-355 (371)
AF-Q69TY0-F1-model_v4	WAT1-related protein	Oryza sativa Japonica Group	1	11.5	1.07e-06	296	38-414 (414)	2-351 (389)
AF-Q8RWL5-F1-model_v4	Protein CLT3, chloroplastic	Arabidopsis thaliana	1	15.6	6.61e-08	296	1-414 (414)	56-443 (452)
AF-Q24JQ0-F1-model_v4	Transmembrane protein 241	Homo sapiens	1	11.3	2.46e-06	295	45-400 (414)	3-295 (296)
AF-Q551D6-F1-model_v4	TPT domain-containing protein	Dictyostelium discoideum	1	14.6	1.37e-06	295	51-409 (414)	13-313 (314)
AF-I1MA32-F1-model_v4	TPT domain-containing protein	Glycine max	1	11.6	6.23e-07	295	36-401 (414)	2-309 (342)
AF-O49722-F1-model_v4	Probable purine permease 6	Arabidopsis thaliana	1	12.6	5.98e-07	295	1-412 (414)	1-370 (387)
AF-O59785-F1-model_v4	Uncharacterized solute carrier family 35 member C320.08	Schizosaccharomyces pombe 972h-	1	13.1	1.52e-07	295	1-394 (414)	94-432 (505)
AF-I1LGQ5-F1-model_v4	WAT1-related protein	Glycine max	1	12.9	1.21e-06	294	33-408 (414)	5-343 (343)
AF-F4J890-F1-model_v4	Solute carrier family 35 protein (DUF914)	Arabidopsis thaliana	1	12.4	1.23e-07	294	41-414 (414)	6-362 (363)
AF-A0A1D6EB43-F1-model_v4	WAT1-related protein	Zea mays	1	14.8	9.85e-07	294	39-407 (414)	4-352 (378)
AF-I1M068-F1-model_v4	TPT domain-containing protein	Glycine max	1	11.5	8.84e-08	294	1-407 (414)	51-403 (406)
AF-C0NDW5-F1-model_v4	DUF914 domain-containing protein	Histoplasma capsulatum G186AR	1	14.6	1.58e-07	294	1-395 (414)	1-369 (426)
AF-A0A0K0EQ11-F1-model_v4	Uncharacterized protein	Strongyloides stercoralis	1	14	4.29e-07	293	44-406 (414)	3-315 (316)
AF-A0A1D6HB74-F1-model_v4	Nucleotide-sugar transporter/ sugar porter	Zea mays	1	12	7.67e-07	293	52-394 (414)	20-313 (324)
AF-D3ZAN4-F1-model_v4	Solute carrier family 35 member B4	Rattus norvegicus	1	12.2	1.58e-07	293	48-414 (414)	3-331 (331)
AF-Q2QXJ5-F1-model_v4	Os12g0154600 protein	Oryza sativa Japonica Group	1	12.3	5.5e-07	293	30-394 (414)	4-299 (333)
AF-A0A0P0XP05-F1-model_v4	Os09g0513200 protein	Oryza sativa Japonica Group	1	11.7	2.72e-07	293	31-414 (414)	1-331 (348)
AF-A0A0R0JLN2-F1-model_v4	WAT1-related protein	Glycine max	1	11.2	1.16e-06	293	46-414 (414)	9-342 (362)
AF-A0A0R0KCG1-F1-model_v4	WAT1-related protein	Glycine max	1	13.4	3.08e-07	293	34-414 (414)	2-340 (366)
AF-K7LAB4-F1-model_v4	Uncharacterized protein	Glycine max	1	10.9	1.79e-07	293	1-414 (414)	8-406 (415)
AF-Q6K5X9-F1-model_v4	Os02g0614500 protein	Oryza sativa Japonica Group	1	13.2	4.66e-07	292	29-408 (414)	1-330 (331)
AF-Q9FIH5-F1-model_v4	UDP-rhamnose/UDP-galactose transporter 3	Arabidopsis thaliana	1	12	6.5e-07	292	23-414 (414)	1-324 (350)
AF-C0PHS3-F1-model_v4	Nucleotide/sugar transporter family protein	Zea mays	1	15.8	4.11e-07	292	36-413 (414)	4-310 (357)
AF-Q8H184-F1-model_v4	Probable sugar phosphate/phosphate translocator At1g06470	Arabidopsis thaliana	1	11.8	5.74e-07	292	1-414 (414)	16-400 (414)
AF-G4VPL7-F1-model_v4	Solute carrier family 35-related	Schistosoma mansoni	1	12.9	8.13e-08	292	31-395 (414)	1-394 (416)
AF-Q9HXB6-F1-model_v4	Uncharacterized protein	Pseudomonas aeruginosa PAO1	1	12.6	1.35e-05	291	51-393 (414)	2-284 (300)
AF-P0AA67-F1-model_v4	Threonine/homoserine exporter RhtA	Escherichia coli K-12	1	13.5	5.41e-06	290	48-414 (414)	10-290 (295)
AF-Q8RY83-F1-model_v4	Probable purine permease 13	Arabidopsis thaliana	1	14	6.5e-07	290	41-408 (414)	31-361 (361)
AF-Q8RY74-F1-model_v4	Probable purine permease 22	Arabidopsis thaliana	1	11.5	6.77e-07	290	22-414 (414)	1-373 (377)
AF-Q6DBP3-F1-model_v4	Probable sugar phosphate/phosphate translocator At5g05820	Arabidopsis thaliana	1	12.8	8.69e-07	289	35-401 (414)	2-308 (309)
AF-B6T9F8-F1-model_v4	WAT1-related protein	Zea mays	1	11.2	9.06e-07	289	31-413 (414)	1-346 (383)
AF-Q5T1Q4-F1-model_v4	Solute carrier family 35 member F1	Homo sapiens	1	13.2	7.8e-08	289	1-414 (414)	10-381 (408)
AF-A0A0K0EI26-F1-model_v4	Uncharacterized protein	Strongyloides stercoralis	1	12.8	1.07e-06	289	1-407 (414)	73-431 (434)
AF-I1M7Z0-F1-model_v4	TPT domain-containing protein	Glycine max	1	13.1	8.69e-07	288	37-400 (414)	2-305 (306)
AF-Q4DXG2-F1-model_v4	GDP-mannose transporter, putative	Trypanosoma cruzi strain CL Brener	1	10.9	1.03e-06	288	43-414 (414)	2-321 (322)
AF-K7MY96-F1-model_v4	TPT domain-containing protein	Glycine max	1	13.3	3.34e-07	288	2-399 (414)	23-348 (350)
AF-Q9LDH3-F1-model_v4	Probable sugar phosphate/phosphate translocator At1g12500	Arabidopsis thaliana	1	14.5	2.72e-07	288	1-405 (414)	14-360 (361)
AF-A0A0P0VDM6-F1-model_v4	WAT1-related protein	Oryza sativa Japonica Group	1	10.1	1.76e-06	288	36-414 (414)	2-354 (377)
AF-B4G1Q3-F1-model_v4	Nucleotide/sugar transporter family protein	Zea mays	1	13.7	4.47e-07	288	23-410 (414)	7-359 (384)
AF-Q7ZW46-F1-model_v4	UDP-xylose and UDP-N-acetylglucosamine transporter	Danio rerio	1	12.6	6.23e-07	287	47-414 (414)	2-331 (331)
AF-I1J9V6-F1-model_v4	WAT1-related protein	Glycine max	1	13.6	1.69e-06	287	31-413 (414)	1-337 (341)
AF-Q9FLL4-F1-model_v4	Putative purine permease 12	Arabidopsis thaliana	1	13.6	5.98e-07	287	29-408 (414)	13-358 (358)
AF-Q6ZGZ0-F1-model_v4	Os02g0689200 protein	Oryza sativa Japonica Group	1	11.6	1.58e-07	287	1-411 (414)	15-385 (385)
AF-A0A0R0KN83-F1-model_v4	TPT domain-containing protein	Glycine max	1	11.3	2.95e-07	287	1-412 (414)	20-402 (455)
AF-Q32AD2-F1-model_v4	Uncharacterized protein	Shigella dysenteriae Sd197	1	15.7	3.63e-07	286	23-393 (414)	1-299 (312)
AF-F4IYZ0-F1-model_v4	WAT1-related protein At3g28080	Arabidopsis thaliana	1	11.1	3.57e-06	286	39-412 (414)	2-344 (358)
AF-I1NA06-F1-model_v4	WAT1-related protein	Glycine max	1	11.4	3.08e-07	286	36-414 (414)	2-361 (383)
AF-Q2V3H2-F1-model_v4	Probable purine permease 7	Arabidopsis thaliana	1	11.7	6.77e-07	286	32-414 (414)	29-381 (390)
AF-F4IJ08-F1-model_v4	WAT1-related protein At2g40900	Arabidopsis thaliana	1	11.8	1.03e-06	286	27-407 (414)	1-336 (394)
AF-K7LI69-F1-model_v4	TPT domain-containing protein	Glycine max	1	12.7	2.6e-07	286	10-408 (414)	95-419 (419)
AF-A0A1D6JBX5-F1-model_v4	Putative purine permease 11	Zea mays	1	12.9	4.86e-07	286	2-411 (414)	295-661 (673)
AF-A0A0R0H0Y3-F1-model_v4	AP2/ERF domain-containing protein	Glycine max	1	12.7	3.21e-07	285	1-414 (414)	317-716 (737)
AF-Q5XF09-F1-model_v4	Probable sugar phosphate/phosphate translocator At3g11320	Arabidopsis thaliana	1	13.4	1.26e-06	284	35-400 (414)	2-307 (308)
AF-A4I5U5-F1-model_v4	Triose-phosphate_Transporter_family_-_putative	Leishmania infantum	1	14.2	2.08e-06	284	44-413 (414)	6-301 (325)
AF-A0A0R0GDZ3-F1-model_v4	WAT1-related protein	Glycine max	1	11	2.08e-06	284	51-414 (414)	7-337 (344)
AF-A0A0R0G0H7-F1-model_v4	WAT1-related protein	Glycine max	1	11.5	1.37e-06	284	35-414 (414)	2-357 (360)
AF-Q7TML3-F1-model_v4	Solute carrier family 35 member F2	Mus musculus	1	16.2	1.4e-07	284	1-393 (414)	1-332 (375)
AF-K7N0I6-F1-model_v4	WAT1-related protein	Glycine max	1	12.4	9.85e-07	284	41-407 (414)	5-337 (383)
AF-A0A175W2J0-F1-model_v4	TPT domain-containing protein	Madurella mycetomatis	1	13.7	3.79e-07	284	1-410 (414)	1-356 (403)
AF-G4SSQ1-F1-model_v4	Uncharacterized protein	Caenorhabditis elegans	1	14.1	2.12e-07	284	1-393 (414)	50-406 (482)
AF-Q4DLY5-F1-model_v4	GDP-mannose transporter, putative	Trypanosoma cruzi strain CL Brener	1	11.1	1.12e-06	283	48-414 (414)	7-320 (322)
AF-Q69KL6-F1-model_v4	Os06g0188100 protein	Oryza sativa Japonica Group	1	10.9	3.02e-06	283	50-414 (414)	12-320 (323)
AF-Q9AV45-F1-model_v4	Integral membrane protein, putative, expressed	Oryza sativa Japonica Group	1	14.2	3.95e-07	283	31-413 (414)	1-317 (370)
AF-I1KA85-F1-model_v4	WAT1-related protein	Glycine max	1	11.9	2.17e-06	283	34-394 (414)	7-334 (372)
AF-Q69PB8-F1-model_v4	WAT1-related protein	Oryza sativa Japonica Group	1	11.4	1.76e-06	283	24-412 (414)	1-343 (385)
AF-A0A286YBG7-F1-model_v4	Uncharacterized protein	Danio rerio	1	16	7.36e-07	283	44-414 (414)	2-320 (405)
AF-B0K004-F1-model_v4	Solute carrier family 35 member G3	Rattus norvegicus	1	11.9	7.36e-07	282	2-412 (414)	14-339 (340)
AF-P0CL04-F1-model_v4	Threonine/homoserine exporter RhtA	Salmonella enterica subsp. enterica serovar Typhimurium str. LT2	1	12.9	8.21e-06	281	48-395 (414)	10-281 (295)
AF-Q6ICL7-F1-model_v4	Solute carrier family 35 member E4	Homo sapiens	1	13.6	7.67e-07	281	1-414 (414)	11-347 (350)
AF-F4I5D5-F1-model_v4	WAT1-related protein At1g70260	Arabidopsis thaliana	1	12.7	8.34e-07	281	37-412 (414)	2-348 (375)
AF-Q9LRP2-F1-model_v4	Probable sugar phosphate/phosphate translocator At3g17430	Arabidopsis thaliana	1	11.6	2e-06	281	36-414 (414)	2-336 (375)
AF-I1MHQ0-F1-model_v4	TPT domain-containing protein	Glycine max	1	12.2	2.56e-06	281	47-414 (414)	6-333 (384)
AF-Q568R5-F1-model_v4	Solute carrier family 35 member E4	Danio rerio	1	14	2.83e-07	281	10-412 (414)	2-339 (387)
AF-Q8H7P2-F1-model_v4	Expressed protein	Oryza sativa Japonica Group	1	13.6	2.6e-07	281	1-412 (414)	8-381 (399)
AF-Q9SS40-F1-model_v4	Probable sugar phosphate/phosphate translocator At3g10290	Arabidopsis thaliana	1	13.1	1.21e-06	280	1-399 (414)	4-353 (355)
AF-A0A0R0KG07-F1-model_v4	TPT domain-containing protein	Glycine max	1	13.8	1.84e-06	279	43-401 (414)	12-310 (312)
AF-Q5RKH7-F1-model_v4	Solute carrier family 35 member F6	Rattus norvegicus	1	16.5	4.86e-07	279	48-412 (414)	7-354 (372)
AF-O80638-F1-model_v4	WAT1-related protein At2g39510	Arabidopsis thaliana	1	10.9	2.78e-06	279	55-398 (414)	10-324 (374)
AF-Q5BLI7-F1-model_v4	Solute carrier family 35 member G2b	Danio rerio	1	14	1.4e-07	279	16-414 (414)	60-413 (413)
AF-Q9FYE5-F1-model_v4	UDP-URONIC ACID TRANSPORTER 1	Arabidopsis thaliana	1	14.5	4.59e-06	278	31-404 (414)	1-309 (309)
AF-Q8GZZ6-F1-model_v4	Os03g0286300 protein	Oryza sativa Japonica Group	1	15.4	4.66e-07	278	23-399 (414)	1-319 (322)
AF-B6TX95-F1-model_v4	Organic anion transporter	Zea mays	1	15.1	5.74e-07	278	22-400 (414)	1-321 (324)
AF-P0C7Q5-F1-model_v4	Putative solute carrier family 35 member G4	Homo sapiens	1	12.5	1.76e-06	278	1-408 (414)	8-338 (338)
AF-A0A1D6MC36-F1-model_v4	Purine permease	Zea mays	1	12.4	2.08e-06	278	34-407 (414)	2-337 (366)
AF-Q9VGN6-F1-model_v4	RH69884p	Drosophila melanogaster	1	12.5	1.21e-06	277	26-413 (414)	14-336 (347)
AF-K7LRN7-F1-model_v4	TPT domain-containing protein	Glycine max	1	12.9	4.86e-07	277	1-400 (414)	46-407 (408)
AF-Q5M8T2-F1-model_v4	Solute carrier family 35 member D3	Homo sapiens	1	12.9	2.46e-06	277	44-413 (414)	4-318 (416)
AF-A0A0N4UD33-F1-model_v4	TPT domain-containing protein	Dracunculus medinensis	1	14.1	3.29e-06	276	59-414 (414)	2-320 (329)
AF-Q945L4-F1-model_v4	WAT1-related protein At5g40210	Arabidopsis thaliana	1	13.3	3.08e-07	276	39-413 (414)	3-330 (339)
AF-I1JDE8-F1-model_v4	WAT1-related protein	Glycine max	1	12.4	3.29e-06	276	32-407 (414)	1-356 (361)
AF-Q09875-F1-model_v4	Uncharacterized protein C12G12.12	Schizosaccharomyces pombe 972h-	1	14.4	1.91e-06	275	50-393 (414)	2-313 (324)
AF-A0A0G2JTZ7-F1-model_v4	Solute carrier family 35, member F2	Rattus norvegicus	1	16.3	9.6e-08	275	18-394 (414)	2-333 (375)
AF-A0A1D6L126-F1-model_v4	Organic anion transporter	Zea mays	1	12.4	4.98e-06	275	44-413 (414)	5-314 (378)
AF-A0A175VZ14-F1-model_v4	Uncharacterized protein	Madurella mycetomatis	1	16.1	2.4e-07	275	1-404 (414)	1-374 (413)
AF-A0A0P0WMA8-F1-model_v4	Os05g0409500 protein	Oryza sativa Japonica Group	1	10.6	1.37e-06	275	34-407 (414)	71-422 (487)
AF-I1MUW6-F1-model_v4	TPT domain-containing protein	Glycine max	1	15.5	3.95e-07	274	1-403 (414)	8-353 (355)
AF-I1KA88-F1-model_v4	WAT1-related protein	Glycine max	1	10.9	2.78e-06	274	46-414 (414)	9-341 (365)
AF-I1L797-F1-model_v4	WAT1-related protein	Glycine max	1	12.7	3.43e-06	274	41-407 (414)	2-334 (383)
AF-A0A0D2GRW6-F1-model_v4	Unplaced genomic scaffold supercont1.2, whole genome shotgun sequence	Fonsecaea pedrosoi CBS 271.37	1	11.3	9.85e-07	274	1-410 (414)	14-360 (403)
AF-A0A0H3GK88-F1-model_v4	Uncharacterized protein	Klebsiella pneumoniae subsp. pneumoniae HS11286	1	12.1	2.78e-06	273	43-414 (414)	8-293 (293)
AF-I1J761-F1-model_v4	TPT domain-containing protein	Glycine max	1	12	2.67e-06	273	54-399 (414)	14-310 (314)
AF-Q54KI9-F1-model_v4	TPT domain-containing protein	Dictyostelium discoideum	1	16.3	1.12e-06	273	34-407 (414)	7-326 (348)
AF-A0A1D6E1Q2-F1-model_v4	Putative purine permease 11	Zea mays	1	11	4.66e-07	273	1-406 (414)	4-371 (372)
AF-I1M6E6-F1-model_v4	TPT domain-containing protein	Glycine max	1	15.2	1.43e-06	273	34-398 (414)	46-343 (383)
AF-Q9UUI8-F1-model_v4	Uncharacterized transporter C22F8.04	Schizosaccharomyces pombe 972h-	1	13.2	1.23e-07	273	1-408 (414)	14-383 (383)
AF-I1LIF5-F1-model_v4	WAT1-related protein	Glycine max	1	11.2	4.4e-06	273	37-412 (414)	2-359 (389)
AF-K7MPZ0-F1-model_v4	Uncharacterized protein	Glycine max	1	15.5	3.95e-07	273	1-414 (414)	68-412 (412)
AF-B4F896-F1-model_v4	Putative sugar phosphate/phosphate translocator	Zea mays	1	14.9	6.5e-07	272	21-400 (414)	6-321 (324)
AF-Q54YK1-F1-model_v4	Putative UDP-sugar transporter DDB_G0278631	Dictyostelium discoideum	1	12.7	6.77e-07	272	1-400 (414)	21-381 (382)
AF-K7KA44-F1-model_v4	WAT1-related protein	Glycine max	1	13.6	3.88e-06	272	31-401 (414)	1-345 (383)
AF-K7MQB6-F1-model_v4	TPT domain-containing protein	Glycine max	1	13.9	1.43e-06	272	35-394 (414)	80-388 (393)
AF-A0A0N7KG06-F1-model_v4	Os02g0724500 protein	Oryza sativa Japonica Group	1	15.5	8.69e-07	272	33-414 (414)	64-384 (396)
AF-Q93V85-F1-model_v4	WAT1-related protein At3g02690, chloroplastic	Arabidopsis thaliana	1	14.8	4.47e-07	272	1-394 (414)	67-411 (417)
AF-D4A9Q0-F1-model_v4	Transmembrane protein 241	Rattus norvegicus	1	11.9	9.29e-06	271	45-400 (414)	3-295 (297)
AF-I1MZ60-F1-model_v4	TPT domain-containing protein	Glycine max	1	12.8	2.36e-06	271	36-400 (414)	2-306 (307)
AF-I1N037-F1-model_v4	TPT domain-containing protein	Glycine max	1	13.2	4.59e-06	271	39-400 (414)	6-307 (308)
AF-Q9FTZ6-F1-model_v4	WAT1-related protein	Oryza sativa Japonica Group	1	11.7	1.69e-06	271	36-414 (414)	2-344 (374)
AF-I1LM16-F1-model_v4	Uncharacterized protein	Glycine max	1	14.6	6.23e-07	271	1-414 (414)	43-412 (412)
AF-K7KAP8-F1-model_v4	TPT domain-containing protein	Glycine max	1	12.6	3.15e-06	270	37-400 (414)	2-305 (306)
AF-K0F5D2-F1-model_v4	Uncharacterized protein	Nocardia brasiliensis ATCC 700358	1	14.6	2.78e-06	270	41-394 (414)	2-288 (310)
AF-K0EQP7-F1-model_v4	Uncharacterized protein	Nocardia brasiliensis ATCC 700358	1	16	2.17e-06	270	22-413 (414)	1-300 (312)
AF-I1JJL2-F1-model_v4	TPT domain-containing protein	Glycine max	1	16	3.02e-06	270	33-414 (414)	44-357 (376)
AF-D4A5L7-F1-model_v4	Solute carrier family 35, member D3	Rattus norvegicus	1	12.5	1.69e-06	270	44-412 (414)	4-324 (420)
AF-Q554D7-F1-model_v4	Uncharacterized protein	Dictyostelium discoideum	1	11.4	8.92e-06	270	33-407 (414)	5-340 (514)
AF-Q9LX06-F1-model_v4	WAT1-related protein	Oryza sativa Japonica Group	1	12.6	4.4e-06	269	51-402 (414)	10-332 (363)
AF-C4J334-F1-model_v4	Putative purine permease 11	Zea mays	1	13.4	5.06e-07	269	13-407 (414)	12-362 (382)
AF-I1MA26-F1-model_v4	WAT1-related protein	Glycine max	1	11.7	1.37e-06	269	32-414 (414)	1-360 (395)
AF-Q9FG70-F1-model_v4	Nucleotide-sugar uncharacterized transporter 2	Arabidopsis thaliana	1	14.5	1.56e-06	269	29-414 (414)	18-363 (398)
AF-Q8IBU2-F1-model_v4	Drug/metabolite transporter DMT1, putative	Plasmodium falciparum 3D7	1	14	3.79e-07	269	30-402 (414)	20-433 (434)
AF-K0EUT1-F1-model_v4	Uncharacterized protein	Nocardia brasiliensis ATCC 700358	1	14.4	2.17e-06	268	42-402 (414)	3-303 (304)
AF-O74750-F1-model_v4	UDP-N-acetylglucosamine transporter yea4	Schizosaccharomyces pombe 972h-	1	13.2	2.17e-06	268	48-394 (414)	2-301 (316)
AF-A0A183XCQ4-F1-model_v4	TPT domain-containing protein	Wuchereria bancrofti	1	15.6	3.21e-07	268	32-413 (414)	1-370 (397)
AF-K7VFP2-F1-model_v4	WAT1-related protein	Zea mays	1	10.9	1.91e-06	268	34-406 (414)	7-345 (409)
AF-Q2QY17-F1-model_v4	Os12g0136100 protein	Oryza sativa Japonica Group	1	13.6	5.28e-07	268	1-407 (414)	56-400 (428)
AF-E9QF41-F1-model_v4	Solute carrier family 35 member D1b	Danio rerio	1	11.6	5.19e-06	267	1-404 (414)	1-330 (332)
AF-Q941R4-F1-model_v4	GDP-mannose transporter GONST1	Arabidopsis thaliana	1	13.1	2.78e-06	267	1-408 (414)	1-333 (333)
AF-Q9BHL2-F1-model_v4	Yeast Homolog UDP-Gal Transporter	Caenorhabditis elegans	1	12.4	6.66e-06	267	22-413 (414)	6-337 (340)
AF-Q4CY67-F1-model_v4	Uncharacterized protein	Trypanosoma cruzi strain CL Brener	1	11.6	1.21e-06	267	1-393 (414)	1-333 (347)
AF-A0A0R0ERJ9-F1-model_v4	WAT1-related protein	Glycine max	1	13.4	1.32e-06	267	50-414 (414)	12-351 (366)
AF-Q5ADN8-F1-model_v4	UDP-galactose transporter homolog 1	Candida albicans SC5314	1	13.5	3.02e-06	267	33-414 (414)	6-370 (370)
AF-K7KJU1-F1-model_v4	WAT1-related protein	Glycine max	1	8.3	2.67e-06	267	33-413 (414)	4-353 (398)
AF-I1L123-F1-model_v4	Uncharacterized protein	Glycine max	1	13.3	4.66e-07	267	20-407 (414)	6-384 (401)
AF-D3ZVG2-F1-model_v4	Solute carrier family 35 (UDP-glucuronic acid/UDP-N-acetylgalactosamine dual transporter), member D1 (Predicted)	Rattus norvegicus	1	12	2.56e-06	266	49-414 (414)	6-318 (325)
AF-P0C7Q6-F1-model_v4	Solute carrier family 35 member G6	Homo sapiens	1	11.1	9.29e-06	266	1-408 (414)	8-338 (338)
AF-Q0DL57-F1-model_v4	Os05g0121900 protein	Oryza sativa Japonica Group	1	14.3	9.45e-07	265	21-399 (414)	2-338 (340)
AF-I1JPE1-F1-model_v4	WAT1-related protein	Glycine max	1	13	7.06e-07	265	36-414 (414)	2-350 (377)
AF-Q9SUF1-F1-model_v4	WAT1-related protein At4g08290	Arabidopsis thaliana	1	11.2	2.17e-06	265	32-414 (414)	1-350 (384)
AF-K0F9Z5-F1-model_v4	Uncharacterized protein	Nocardia brasiliensis ATCC 700358	1	11.2	2.22e-05	264	53-414 (414)	2-285 (292)
AF-A0A175WD95-F1-model_v4	TPT domain-containing protein	Madurella mycetomatis	1	12.2	2.78e-06	264	31-412 (414)	1-343 (392)
AF-K7LBU2-F1-model_v4	Uncharacterized protein	Glycine max	1	13.3	3.95e-07	264	20-411 (414)	23-396 (409)
AF-Q96KT7-F1-model_v4	Solute carrier family 35 member G5	Homo sapiens	1	11.6	4.98e-06	263	1-408 (414)	8-338 (338)
AF-A0A0P0XPZ0-F1-model_v4	Os09g0548600 protein	Oryza sativa Japonica Group	1	14.2	6.5e-07	263	50-413 (414)	2-330 (346)
AF-K7KBU0-F1-model_v4	Uncharacterized protein	Glycine max	1	14.1	7.06e-07	263	1-401 (414)	1-355 (355)
AF-A0A1D6Q3M3-F1-model_v4	CMP-sialic acid transporter 5	Zea mays	1	11.2	1.69e-06	263	52-394 (414)	20-344 (355)
AF-Q9LXX8-F1-model_v4	WAT1-related protein At3g56620	Arabidopsis thaliana	1	13.1	9.45e-07	263	28-413 (414)	1-349 (377)
AF-A0A0R4J421-F1-model_v4	TPT domain-containing protein	Glycine max	1	11.4	7.24e-06	263	50-414 (414)	9-336 (384)
AF-Q12520-F1-model_v4	UDP-galactose transporter homolog 1	Saccharomyces cerevisiae S288C	1	11.2	2.56e-06	262	46-414 (414)	6-339 (339)
AF-B6UH66-F1-model_v4	Organic anion transporter	Zea mays	1	14	1.49e-06	262	1-402 (414)	1-337 (339)
AF-Q9W429-F1-model_v4	UDP-xylose and UDP-N-acetylglucosamine transporter	Drosophila melanogaster	1	11.2	7.06e-07	262	47-414 (414)	6-352 (352)
AF-Q60DT9-F1-model_v4	Os05g0168700 protein	Oryza sativa Japonica Group	1	16.3	8.34e-07	262	48-414 (414)	8-321 (354)
AF-U7PMS2-F1-model_v4	Uncharacterized protein	Sporothrix schenckii ATCC 58251	1	14.5	9.45e-07	262	1-413 (414)	12-423 (427)
AF-B6U002-F1-model_v4	UDP-N-acetylglucosamine (UAA) transporter family	Zea mays	1	11.1	1.24e-05	261	49-414 (414)	11-316 (323)
AF-Q550A6-F1-model_v4	Crt homolog 2	Dictyostelium discoideum	1	10.5	1.65e-07	261	1-414 (414)	1-424 (484)
AF-P46136-F1-model_v4	Aromatic amino acid exporter YddG	Escherichia coli K-12	1	13.8	1.3e-05	260	51-395 (414)	6-288 (293)
AF-A0A1D6E949-F1-model_v4	Putative purine permease 11	Zea mays	1	12.7	3.29e-06	260	48-398 (414)	3-312 (313)
AF-A0A0N4UM33-F1-model_v4	Uncharacterized protein	Dracunculus medinensis	1	13.4	9.69e-06	260	33-393 (414)	4-321 (332)
AF-C6TJ06-F1-model_v4	WAT1-related protein	Glycine max	1	11.8	4.78e-06	260	38-414 (414)	2-351 (363)
AF-A0A5K4F0V1-F1-model_v4	GDP-L-fucose transporter	Schistosoma mansoni	1	13.1	3.15e-06	260	51-414 (414)	5-317 (374)
AF-Q9VGF5-F1-model_v4	LP09696p	Drosophila melanogaster	1	12.3	1.43e-06	260	52-413 (414)	5-369 (381)
AF-A0A1D6KM72-F1-model_v4	WAT1-related protein	Zea mays	1	10.5	2.9e-06	260	23-412 (414)	1-363 (406)
AF-Q32G32-F1-model_v4	EamA domain-containing protein	Shigella dysenteriae Sd197	1	17.1	2.52e-05	259	167-411 (414)	27-266 (266)
AF-Q8ZK79-F1-model_v4	Putative permease	Salmonella enterica subsp. enterica serovar Typhimurium str. LT2	1	10.9	1.88e-05	259	44-394 (414)	13-304 (308)
AF-K7LNS1-F1-model_v4	WAT1-related protein	Glycine max	1	11	1.14e-05	259	43-411 (414)	4-354 (362)
AF-E2EAJ0-F1-model_v4	GDP-L-fucose transporter	Schistosoma mansoni	1	13.6	4.22e-06	259	44-414 (414)	7-326 (383)
AF-Q55DM5-F1-model_v4	Adenosine 3'-phospho 5'-phosphosulfate transporter 1	Dictyostelium discoideum	1	11.1	7.24e-06	258	26-403 (414)	1-335 (359)
AF-Q8IXU6-F1-model_v4	Solute carrier family 35 member F2	Homo sapiens	1	15.9	6.23e-07	258	22-394 (414)	2-333 (374)
AF-Q54T99-F1-model_v4	Uncharacterized protein	Dictyostelium discoideum	1	11.7	3.48e-07	258	1-404 (414)	1-402 (405)
AF-Q55C66-F1-model_v4	Crt homolog 3	Dictyostelium discoideum	1	10	7.67e-07	258	1-414 (414)	10-421 (478)
AF-A0A1D8PF61-F1-model_v4	Mannosylinositol phosphorylceramide synthase regulatory subunit	Candida albicans SC5314	1	12.7	5.74e-07	258	30-398 (414)	4-461 (489)
AF-A0A0R0JUA6-F1-model_v4	TPT domain-containing protein	Glycine max	1	13.9	2.56e-06	257	25-399 (414)	1-336 (339)
AF-Q54D01-F1-model_v4	Uncharacterized protein	Dictyostelium discoideum	1	11.6	1.03e-06	257	1-394 (414)	348-695 (698)
AF-A0A0H3GRE4-F1-model_v4	Uncharacterized protein	Klebsiella pneumoniae subsp. pneumoniae HS11286	1	14.1	1.73e-05	256	47-396 (414)	2-280 (298)
AF-I1KYT8-F1-model_v4	TPT domain-containing protein	Glycine max	1	14	2.46e-06	256	39-400 (414)	6-307 (308)
AF-C6TK68-F1-model_v4	TPT domain-containing protein	Glycine max	1	13.8	5.41e-06	256	31-393 (414)	1-297 (333)
AF-D3ZFM3-F1-model_v4	Solute carrier family 35, member F1	Rattus norvegicus	1	15	1.26e-06	256	44-414 (414)	3-324 (351)
AF-Q5VRN2-F1-model_v4	WAT1-related protein	Oryza sativa Japonica Group	1	12.1	6.13e-06	256	48-413 (414)	9-350 (360)
AF-A0A1C1CX73-F1-model_v4	Putative solute carrier family 35 member	Cladophialophora carrionii	1	14.9	2.4e-07	256	1-394 (414)	26-372 (426)
AF-A0A0K0ESJ1-F1-model_v4	Uncharacterized protein	Strongyloides stercoralis	1	12.9	4.98e-06	256	50-414 (414)	1539-1849 (1854)
AF-A0A0P0WN10-F1-model_v4	Os05g0444500 protein	Oryza sativa Japonica Group	1	14.3	8.21e-06	255	47-395 (414)	9-265 (270)
AF-A2AKQ0-F1-model_v4	UDP-glucuronic acid/UDP-N-acetylgalactosamine transporter	Mus musculus	1	12.8	2.46e-06	255	1-414 (414)	5-348 (355)
AF-K7WCJ9-F1-model_v4	WAT1-related protein	Zea mays	1	12.9	8.55e-06	255	31-414 (414)	1-375 (388)
AF-Q8WZJ9-F1-model_v4	UDP-galactose transporter homolog 1	Schizosaccharomyces pombe 972h-	1	10.7	1.96e-05	254	45-410 (414)	2-319 (322)
AF-A0A0H3GQA7-F1-model_v4	Threonine and homoserine efflux system	Klebsiella pneumoniae subsp. pneumoniae HS11286	1	13.3	2.52e-05	253	46-414 (414)	8-290 (295)
AF-K7KLK6-F1-model_v4	TPT domain-containing protein	Glycine max	1	14.1	5.64e-06	253	31-393 (414)	1-297 (333)
AF-Q6K5Y4-F1-model_v4	Os02g0614100 protein	Oryza sativa Japonica Group	1	14.1	2.67e-06	253	1-394 (414)	1-339 (346)
AF-Q9SRE4-F1-model_v4	UDP-rhamnose/UDP-galactose transporter 1	Arabidopsis thaliana	1	11.6	5.41e-06	253	31-414 (414)	2-319 (347)
AF-Q8BGF8-F1-model_v4	Solute carrier family 35 member D3	Mus musculus	1	13.2	9.29e-06	253	44-407 (414)	4-310 (422)
AF-C7G035-F1-model_v4	Transmembrane protein	Dictyostelium discoideum	1	12	1.84e-06	253	1-414 (414)	61-436 (491)
AF-A4IA88-F1-model_v4	Lipophosphoglycan biosynthetic protein (Lpg2)	Leishmania infantum	1	13.2	3.43e-06	252	40-407 (414)	2-309 (341)
AF-A0A077Z6G7-F1-model_v4	Solute carrier family 35 member C2	Trichuris trichiura	1	9.7	2.74e-05	252	39-407 (414)	3-349 (371)
AF-A0A1D6ET04-F1-model_v4	Anthocyanin-related membrane protein 1 (Anm1)-like	Zea mays	1	12.6	7.06e-07	252	47-412 (414)	11-339 (387)
AF-A0A1C1CKP4-F1-model_v4	Putative sugar phosphate/phosphate translocator	Cladophialophora carrionii	1	12.7	3.72e-06	252	1-410 (414)	10-357 (400)
AF-Q32G24-F1-model_v4	Uncharacterized protein	Shigella dysenteriae Sd197	1	13.1	2.52e-05	251	51-395 (414)	6-288 (293)
AF-Q6ZL17-F1-model_v4	CMP-sialic acid transporter 2	Oryza sativa Japonica Group	1	15.2	1.76e-06	251	12-395 (414)	16-349 (356)
AF-C6T892-F1-model_v4	WAT1-related protein	Glycine max	1	12.8	3.15e-06	251	36-414 (414)	2-351 (409)
AF-A0A0N4UQ46-F1-model_v4	Uncharacterized protein	Dracunculus medinensis	1	11.1	5.28e-07	251	1-414 (414)	24-397 (418)
AF-A0A3Q0KTR4-F1-model_v4	Solute carrier family 35 member d1, putative	Schistosoma mansoni	1	13.9	5.41e-06	250	56-413 (414)	3-295 (298)
AF-I1KTC4-F1-model_v4	TPT domain-containing protein	Glycine max	1	13.7	1.01e-05	250	31-393 (414)	1-297 (336)
AF-K7KNA2-F1-model_v4	Uncharacterized protein	Glycine max	1	12.4	9.06e-07	250	22-411 (414)	9-364 (390)
AF-Q76EJ3-F1-model_v4	UDP-N-acetylglucosamine/UDP-glucose/GDP-mannose transporter	Homo sapiens	1	15.4	3.15e-06	249	11-413 (414)	1-332 (337)
AF-Q6YYC6-F1-model_v4	Os08g0135100 protein	Oryza sativa Japonica Group	1	13.7	8.21e-06	249	33-414 (414)	7-323 (350)
AF-Q5RKL7-F1-model_v4	Solute carrier family 35 member E4	Rattus norvegicus	1	12.3	7.55e-06	249	22-414 (414)	4-347 (350)
AF-Q95YI5-F1-model_v4	UDP-sugar transporter UST74c	Drosophila melanogaster	1	13	2.17e-06	249	34-413 (414)	46-365 (373)
AF-Q9FL41-F1-model_v4	WAT1-related protein At5g07050	Arabidopsis thaliana	1	11	3.43e-06	249	31-413 (414)	2-360 (402)
AF-F1QZD9-F1-model_v4	Solute carrier family 35 member D1a	Danio rerio	1	12.7	3.57e-06	248	34-407 (414)	2-326 (336)
AF-I0J129-F1-model_v4	Oryza sativa Japonica Group mRNA	Oryza sativa Japonica Group	1	13.1	5.88e-06	248	30-393 (414)	64-381 (387)
AF-A4I0N2-F1-model_v4	Putative CMP-sialic acid transporter	Leishmania infantum	1	12.8	3.63e-07	248	1-393 (414)	50-553 (557)
AF-Q0P881-F1-model_v4	Putative integral membrane protein	Campylobacter jejuni subsp. jejuni NCTC 11168 = ATCC 700819	1	13.7	1.14e-05	247	47-394 (414)	7-292 (298)
AF-K7LKU9-F1-model_v4	TPT domain-containing protein	Glycine max	1	13.7	6.66e-06	247	28-393 (414)	1-297 (322)
AF-A0A1D6PXF9-F1-model_v4	GDP-mannose transporter GONST1	Zea mays	1	13	1.91e-06	247	1-410 (414)	64-419 (420)
AF-I1MP32-F1-model_v4	TPT domain-containing protein	Glycine max	1	13.6	9.29e-06	246	30-393 (414)	3-292 (317)
AF-I1M628-F1-model_v4	Uncharacterized protein	Glycine max	1	15.5	2.26e-06	246	15-401 (414)	15-355 (355)
AF-Q4DDH5-F1-model_v4	UDP-glucuronic acid/UDP-N-acetylgalactosamine transporter, putative	Trypanosoma cruzi strain CL Brener	1	14.8	1.07e-06	246	1-412 (414)	20-386 (387)
AF-I1JB17-F1-model_v4	TPT domain-containing protein	Glycine max	1	12	6.39e-06	245	34-414 (414)	2-339 (345)
AF-F4JMI7-F1-model_v4	WAT1-related protein At4g16620	Arabidopsis thaliana	1	12.7	5.88e-06	245	37-413 (414)	2-357 (359)
AF-A0A0D2EXU5-F1-model_v4	Unplaced genomic scaffold supercont1.5, whole genome shotgun sequence	Fonsecaea pedrosoi CBS 271.37	1	13.5	4.66e-07	245	1-394 (414)	17-371 (425)
AF-A0A1D8PPF3-F1-model_v4	Sly41p	Candida albicans SC5314	1	12.2	4.11e-07	245	1-399 (414)	90-517 (523)
AF-Q762D5-F1-model_v4	UDP-N-acetylglucosamine/UDP-glucose/GDP-mannose transporter	Mus musculus	1	15	4.98e-06	244	48-414 (414)	12-316 (326)
AF-I1MLZ7-F1-model_v4	WAT1-related protein	Glycine max	1	11.5	9.29e-06	243	35-413 (414)	2-364 (387)
AF-I1JDB9-F1-model_v4	TPT domain-containing protein	Glycine max	1	13.7	1.19e-05	242	30-393 (414)	3-297 (322)
AF-A0A1U7F1Z0-F1-model_v4	BMA-UGTP-1, isoform e	Brugia malayi	1	16.1	7.06e-07	242	16-393 (414)	2-340 (345)
AF-A0A1D6IIB6-F1-model_v4	Nucleotide sugar transporter-KT 1	Zea mays	1	14.1	6.13e-06	242	3-413 (414)	16-372 (372)
AF-U7PR28-F1-model_v4	Uncharacterized protein	Sporothrix schenckii ATCC 58251	1	12.9	1.19e-05	242	1-412 (414)	42-389 (389)
AF-Q9C654-F1-model_v4	Probable purine permease 23	Arabidopsis thaliana	1	11.9	1.37e-06	242	1-407 (414)	1-383 (394)
AF-A0A5K4F2A6-F1-model_v4	GDP-L-fucose transporter	Schistosoma mansoni	1	12.5	9.69e-06	242	35-414 (414)	7-339 (396)
AF-A0A2R8Q5Q9-F1-model_v4	Solute carrier family 35 member F2	Danio rerio	1	13.9	2.36e-06	242	28-414 (414)	1-361 (396)
AF-A8MRY9-F1-model_v4	UDP-N-acetylglucosamine transporter UGNT1	Arabidopsis thaliana	1	15.2	4.4e-06	241	1-399 (414)	2-342 (344)
AF-K7U120-F1-model_v4	Putative sugar phosphate/phosphate translocator	Zea mays	1	12.6	2.22e-05	241	24-412 (414)	1-326 (354)
AF-A0A1D6LYB2-F1-model_v4	Nucleotide/sugar transporter family protein	Zea mays	1	13.8	2.46e-06	241	36-414 (414)	4-377 (411)
AF-I1NCI6-F1-model_v4	Uncharacterized protein	Glycine max	1	13.9	1.35e-05	240	51-408 (414)	3-317 (317)
AF-Q94JU2-F1-model_v4	WAT1-related protein At3g28050	Arabidopsis thaliana	1	13	2.26e-06	240	49-414 (414)	10-351 (367)
AF-Q9GSB0-F1-model_v4	Crt homolog 1	Dictyostelium discoideum	1	12.1	8e-07	240	1-407 (414)	1-411 (473)
AF-A0A1D6NX08-F1-model_v4	WAT1-related protein	Zea mays	1	11.7	5.41e-06	240	1-413 (414)	375-762 (768)
AF-G4VHD5-F1-model_v4	Putative sugar transporter	Schistosoma mansoni	1	11.6	7.55e-06	239	44-393 (414)	4-305 (315)
AF-K7U1T7-F1-model_v4	Nucleotide/sugar transporter family protein	Zea mays	1	14.1	4.22e-06	239	6-394 (414)	1-341 (348)
AF-A0A1R3QYU2-F1-model_v4	CMP-sialic acid transporter 4	Zea mays	1	14.1	4.05e-06	239	1-401 (414)	4-352 (353)
AF-Q18315-F1-model_v4	TPT domain-containing protein	Caenorhabditis elegans	1	14.9	1.84e-06	239	45-409 (414)	2-357 (393)
AF-A0A0D2GWA0-F1-model_v4	Unplaced genomic scaffold supercont1.6, whole genome shotgun sequence	Fonsecaea pedrosoi CBS 271.37	1	10.9	3.88e-06	239	22-414 (414)	2-393 (451)
AF-K0F661-F1-model_v4	Uncharacterized protein	Nocardia brasiliensis ATCC 700358	1	15.2	1.53e-05	238	55-393 (414)	2-274 (297)
AF-Q94B65-F1-model_v4	UDP-galactose/UDP-glucose transporter 7	Arabidopsis thaliana	1	12.6	1.81e-05	238	49-413 (414)	12-314 (323)
AF-Q9LQZ0-F1-model_v4	Putative purine permease 15	Arabidopsis thaliana	1	11.1	1.56e-06	238	1-408 (414)	1-387 (387)
AF-A0A175VY18-F1-model_v4	Uncharacterized protein	Madurella mycetomatis	1	12.2	4.98e-06	238	44-394 (414)	8-406 (433)
AF-Q0D5Z0-F1-model_v4	Os07g0523600 protein	Oryza sativa Japonica Group	1	13.6	7.87e-06	237	69-393 (414)	2-270 (275)
AF-I1M9I8-F1-model_v4	TPT domain-containing protein	Glycine max	1	16.6	4.98e-06	237	47-399 (414)	38-343 (345)
AF-A0A0N4UQU5-F1-model_v4	TPT domain-containing protein	Dracunculus medinensis	1	16.5	2.74e-05	237	168-406 (414)	59-298 (365)
AF-Q5SNR2-F1-model_v4	Solute carrier family 35 member F6	Danio rerio	1	13.9	3.43e-06	237	44-414 (414)	7-355 (374)
AF-C0NPR4-F1-model_v4	Integral membrane protein	Histoplasma capsulatum G186AR	1	16.2	1.01e-05	237	26-413 (414)	40-370 (376)
AF-A0A175VYU7-F1-model_v4	UDP-galactose transporter 1	Madurella mycetomatis	1	11.9	1.19e-05	237	20-414 (414)	6-421 (421)
AF-A0A1D6KS78-F1-model_v4	WAT1-related protein chloroplastic	Zea mays	1	14.9	2.83e-07	237	3-400 (414)	84-462 (464)
AF-Q2FW00-F1-model_v4	Sugar transporter, putative	Staphylococcus aureus subsp. aureus NCTC 8325	1	12.3	8.77e-05	236	50-394 (414)	4-284 (287)
AF-Q9SZ96-F1-model_v4	UDP-rhamnose/UDP-galactose transporter 5	Arabidopsis thaliana	1	13.4	1.96e-05	236	30-393 (414)	3-297 (335)
AF-K7KTH8-F1-model_v4	TPT domain-containing protein	Glycine max	1	14.4	9.29e-06	236	27-394 (414)	17-346 (347)
AF-Q4D8P5-F1-model_v4	Uncharacterized protein	Trypanosoma cruzi strain CL Brener	1	10.3	3.72e-06	236	39-414 (414)	3-408 (452)
AF-A0A1D6GXX6-F1-model_v4	WAT1-related protein	Zea mays	1	12.4	6.95e-06	235	30-414 (414)	3-347 (363)
AF-A0A0R4IRL5-F1-model_v4	Info solute carrier family 35 member F2,-like	Danio rerio	1	12.9	2.78e-06	235	22-394 (414)	1-331 (390)
AF-C4J9D3-F1-model_v4	UDP-galactose transporter 2	Zea mays	1	12.6	1.81e-05	234	44-413 (414)	12-315 (344)
AF-I1MWS9-F1-model_v4	TPT domain-containing protein	Glycine max	1	15.8	3.57e-06	234	3-399 (414)	1-343 (345)
AF-Q9I0R0-F1-model_v4	Uncharacterized protein	Pseudomonas aeruginosa PAO1	1	15.1	8.92e-06	233	47-414 (414)	4-297 (299)
AF-Q4DSE2-F1-model_v4	Lipophosphoglycan biosynthetic protein 2, putative	Trypanosoma cruzi strain CL Brener	1	13.3	7.55e-06	233	34-414 (414)	14-331 (358)
AF-F4KD68-F1-model_v4	WAT1-related protein At5g45370	Arabidopsis thaliana	1	10	1.05e-05	233	29-414 (414)	1-380 (381)
AF-C6TCV8-F1-model_v4	TPT domain-containing protein	Glycine max	1	11.2	3.1e-05	232	39-412 (414)	2-323 (323)
AF-D4A1T9-F1-model_v4	Solute carrier family 35 member D2	Rattus norvegicus	1	15	1.14e-05	232	48-414 (414)	12-316 (326)
AF-A0A0R0JXQ6-F1-model_v4	TPT domain-containing protein	Glycine max	1	13.1	1.6e-05	232	15-393 (414)	2-309 (349)
AF-Q9FGG3-F1-model_v4	WAT1-related protein At5g64700	Arabidopsis thaliana	1	12.5	2.13e-05	232	51-407 (414)	8-341 (359)
AF-A0A1D8PR34-F1-model_v4	TPT domain-containing protein	Candida albicans SC5314	1	13.3	2.32e-05	232	28-411 (414)	28-388 (396)
AF-I1MUE0-F1-model_v4	TPT domain-containing protein	Glycine max	1	13	5.11e-05	230	35-413 (414)	2-322 (351)
AF-A0A0R0F7W6-F1-model_v4	TPT domain-containing protein	Glycine max	1	9.9	3.82e-05	230	81-413 (414)	13-286 (354)
AF-Q8I5M4-F1-model_v4	Triose or hexose phosphate/phosphate translocator, putative	Plasmodium falciparum 3D7	1	13.3	1.12e-06	230	1-397 (414)	124-477 (478)
AF-A0A0H3GU04-F1-model_v4	EamA domain-containing protein	Klebsiella pneumoniae subsp. pneumoniae HS11286	1	12.1	6.56e-05	229	51-394 (414)	6-287 (292)
AF-P0A1U2-F1-model_v4	Biotin transporter	Salmonella enterica subsp. enterica serovar Typhimurium str. LT2	1	11.1	6.56e-05	228	53-412 (414)	2-298 (299)
AF-Q9FDZ5-F1-model_v4	UDP-rhamnose/UDP-galactose transporter 6	Arabidopsis thaliana	1	13.6	2.22e-05	228	28-393 (414)	1-297 (335)
AF-K7U964-F1-model_v4	WAT1-related protein	Zea mays	1	12.5	1.53e-05	228	40-413 (414)	4-334 (350)
AF-F1Q4Z9-F1-model_v4	Solute carrier family 35 member F1	Danio rerio	1	11.8	1.1e-05	228	2-414 (414)	1-359 (388)
AF-Q585Z4-F1-model_v4	Uncharacterized protein	Trypanosoma brucei brucei TREU927	1	13.7	2.32e-05	227	29-414 (414)	1-322 (322)
AF-Q9ZUI8-F1-model_v4	WAT1-related protein At1g60050	Arabidopsis thaliana	1	12.4	8.92e-06	227	36-414 (414)	2-362 (374)
AF-Q497A2-F1-model_v4	D-serine modulator-1	Rattus norvegicus	1	12.2	1.66e-05	227	2-414 (414)	84-429 (431)
AF-Q8ZLF8-F1-model_v4	Putative inner membrane protein	Salmonella enterica subsp. enterica serovar Typhimurium str. LT2	1	12.9	3.82e-05	226	49-407 (414)	9-320 (323)
AF-A0A1D6LA83-F1-model_v4	GDP-mannose transporter GONST2	Zea mays	1	14.7	1.3e-05	226	34-398 (414)	75-387 (388)
AF-A0A1D6HLC5-F1-model_v4	WAT1-related protein	Zea mays	1	9.6	1.05e-05	226	31-414 (414)	1-349 (394)
AF-Q581R7-F1-model_v4	Lipophosphoglycan biosynthetic protein 2, putative	Trypanosoma brucei brucei TREU927	1	15.4	8.21e-06	225	51-414 (414)	6-318 (340)
AF-A0A0N4U6X2-F1-model_v4	Uncharacterized protein	Dracunculus medinensis	1	8.8	2.52e-05	225	34-395 (414)	7-354 (378)
AF-A0A0K0DVF6-F1-model_v4	Uncharacterized protein	Strongyloides stercoralis	1	12	1.47e-05	224	33-395 (414)	30-345 (347)
AF-B4FZ94-F1-model_v4	CMP-sialic acid transporter 1	Zea mays	1	10.8	4.33e-05	223	51-401 (414)	3-311 (322)
AF-A0A1P8AXP5-F1-model_v4	UDP-N-acetylglucosamine/UDP-glucose/GDP-mannose transporter	Arabidopsis thaliana	1	12.5	2.74e-05	223	1-394 (414)	1-339 (346)
AF-Q9FXH5-F1-model_v4	Purine permease 14	Arabidopsis thaliana	1	11.4	2.67e-06	223	1-408 (414)	1-393 (393)
AF-U7PQG5-F1-model_v4	Uncharacterized protein	Sporothrix schenckii ATCC 58251	1	15.9	4.05e-06	223	11-395 (414)	16-369 (426)
AF-Q5F6N7-F1-model_v4	Membrane protein	Neisseria gonorrhoeae FA 1090	1	12.9	5.55e-05	222	53-407 (414)	2-286 (291)
AF-Q6PGC7-F1-model_v4	Solute carrier family 35 member E3	Mus musculus	1	10.7	4.15e-05	221	41-410 (414)	7-311 (313)
AF-C0HEI6-F1-model_v4	GDP-mannose transporter GONST3	Zea mays	1	11.4	4.4e-06	221	3-414 (414)	1-376 (377)
AF-Q5PP32-F1-model_v4	WAT1-related protein At3g45870	Arabidopsis thaliana	1	10.9	2.52e-05	221	41-414 (414)	2-355 (385)
AF-A0A0R0ISB1-F1-model_v4	WAT1-related protein	Glycine max	1	12.2	1.96e-05	221	24-413 (414)	28-391 (394)
AF-U7Q0J6-F1-model_v4	Uncharacterized protein	Sporothrix schenckii ATCC 58251	1	14.8	8.55e-06	221	48-394 (414)	7-400 (427)
AF-A0A1D6HD28-F1-model_v4	Nucleotide/sugar transporter family protein	Zea mays	1	12.4	5.64e-06	221	6-394 (414)	1-423 (430)
AF-I1JRY4-F1-model_v4	Uncharacterized protein	Glycine max	1	12.8	2.13e-05	219	47-411 (414)	3-333 (335)
AF-P71356-F1-model_v4	Uncharacterized transporter HI_0687	Haemophilus influenzae Rd KW20	1	11.9	4.51e-05	218	53-393 (414)	6-296 (304)
AF-Q57UU3-F1-model_v4	Uncharacterized protein	Trypanosoma brucei brucei TREU927	1	10.9	6.13e-06	218	41-414 (414)	2-416 (418)
AF-Q03697-F1-model_v4	Putative nucleotide-sugar transporter YMD8	Saccharomyces cerevisiae S288C	1	11.9	2.32e-05	217	49-412 (414)	4-392 (442)
AF-A0A044QZM3-F1-model_v4	TPT domain-containing protein	Onchocerca volvulus	1	13.6	6.39e-06	216	53-414 (414)	7-321 (327)
AF-Q9C508-F1-model_v4	Probable purine permease 18	Arabidopsis thaliana	1	15	3.43e-06	216	1-407 (414)	1-379 (390)
AF-A0A0D2HD91-F1-model_v4	Unplaced genomic scaffold supercont1.3, whole genome shotgun sequence	Fonsecaea pedrosoi CBS 271.37	1	13.6	1.24e-05	216	2-412 (414)	17-414 (414)
AF-A0A1C1CU33-F1-model_v4	UDP-galactose transporter	Cladophialophora carrionii	1	11.6	2.98e-05	216	1-410 (414)	10-434 (434)
AF-Q8IBT1-F1-model_v4	Drug/metabolite transporter DMT2	Plasmodium falciparum 3D7	1	12.2	3.66e-05	215	39-410 (414)	2-316 (322)
AF-Q84L08-F1-model_v4	GDP-fucose transporter 1	Arabidopsis thaliana	1	13.6	4.7e-05	215	36-414 (414)	2-316 (341)
AF-F4JN00-F1-model_v4	CMP-sialic acid transporter 4	Arabidopsis thaliana	1	13.2	1.53e-05	215	10-399 (414)	1-351 (352)
AF-Q501F8-F1-model_v4	WAT1-related protein At4g08300	Arabidopsis thaliana	1	11.9	1.6e-05	215	55-413 (414)	13-347 (373)
AF-B7ZWY4-F1-model_v4	WAT1-related protein	Zea mays	1	15.1	6.13e-06	215	21-414 (414)	5-403 (411)
AF-I1J760-F1-model_v4	TPT domain-containing protein	Glycine max	1	11.1	1.3e-05	214	2-407 (414)	1-355 (382)
AF-Q654D9-F1-model_v4	CMP-sialic acid transporter 1	Oryza sativa Japonica Group	1	11.1	6.29e-05	213	51-393 (414)	3-303 (322)
AF-K7UMM7-F1-model_v4	GDP-mannose transporter GONST4	Zea mays	1	11.8	6.03e-05	213	45-414 (414)	2-316 (336)
AF-Q8LGE9-F1-model_v4	CMP-sialic acid transporter 1	Arabidopsis thaliana	1	12.1	2.42e-05	213	47-412 (414)	6-339 (340)
AF-E9AH47-F1-model_v4	Putative CMP-sialic acid transporter	Leishmania infantum	1	11.1	3.57e-06	213	1-393 (414)	50-536 (540)
AF-A0A1D6J773-F1-model_v4	UDP-N-acetylglucosamine (UAA) transporter family	Zea mays	1	12.5	0.000128	212	169-413 (414)	8-247 (256)
AF-Q9VVD9-F1-model_v4	Adenosine 3'-phospho 5'-phosphosulfate transporter 2	Drosophila melanogaster	1	15.7	1.01e-05	212	1-414 (414)	11-392 (396)
AF-Q4DEW5-F1-model_v4	Uncharacterized protein	Trypanosoma cruzi strain CL Brener	1	11.7	1.14e-05	212	1-414 (414)	5-442 (484)
AF-A0A175VW35-F1-model_v4	UDP-galactose transporter 2	Madurella mycetomatis	1	12	2.74e-05	211	1-408 (414)	29-370 (370)
AF-K7KDH6-F1-model_v4	TPT domain-containing protein	Glycine max	1	11.4	1.73e-05	211	1-413 (414)	1-364 (376)
AF-Q9H1N7-F1-model_v4	Adenosine 3'-phospho 5'-phosphosulfate transporter 2	Homo sapiens	1	14.3	7.24e-06	211	5-410 (414)	47-392 (401)
AF-Q2G1A4-F1-model_v4	Uncharacterized protein	Staphylococcus aureus subsp. aureus NCTC 8325	1	10.8	0.000332	210	51-394 (414)	5-290 (293)
AF-K0F3J5-F1-model_v4	Uncharacterized protein	Nocardia brasiliensis ATCC 700358	1	11.9	0.000171	210	37-393 (414)	2-288 (295)
AF-C6T7X5-F1-model_v4	WAT1-related protein	Glycine max	1	12.1	6.83e-05	210	51-413 (414)	9-354 (357)
AF-Q1PFJ4-F1-model_v4	Probable purine permease 17	Arabidopsis thaliana	1	14	4.4e-06	210	1-407 (414)	1-387 (398)
AF-Q6ZCE6-F1-model_v4	Os08g0203900 protein	Oryza sativa Japonica Group	1	13	8.07e-05	209	45-414 (414)	2-320 (342)
AF-A0A1C1D2L2-F1-model_v4	Uncharacterized protein	Cladophialophora carrionii	1	12.5	1.47e-05	209	43-414 (414)	2-434 (436)
AF-A0A3Q0KQS5-F1-model_v4	Putative udp-galactose transporter	Schistosoma mansoni	1	12.6	0.000113	208	53-414 (414)	12-324 (329)
AF-A0A077ZHY6-F1-model_v4	UDP N acetylglucosamine transporter	Trichuris trichiura	1	12.5	3.1e-05	208	29-393 (414)	1-333 (343)
AF-A0A1X7YDZ0-F1-model_v4	TPT domain-containing protein	Zea mays	1	13.9	0.000201	207	169-413 (414)	8-247 (256)
AF-A0A0H3GLM6-F1-model_v4	Putative transport protein	Klebsiella pneumoniae subsp. pneumoniae HS11286	1	11.2	0.000258	207	53-411 (414)	2-299 (299)
AF-Q0IQ11-F1-model_v4	Os12g0154000 protein	Oryza sativa Japonica Group	1	11.3	7.43e-05	207	30-407 (414)	4-327 (334)
AF-Q8W4R9-F1-model_v4	WAT1-related protein At4g19185	Arabidopsis thaliana	1	11.2	2.32e-05	207	24-414 (414)	1-369 (398)
AF-A0A077Z0G3-F1-model_v4	Nuc sug transp domain containing protein	Trichuris trichiura	1	11.3	3.66e-05	206	30-394 (414)	4-329 (333)
AF-A0A1D6MKR2-F1-model_v4	Nucleotide/sugar transporter family protein	Zea mays	1	14.5	1.96e-05	205	36-414 (414)	4-321 (357)
AF-K7LC36-F1-model_v4	TPT domain-containing protein	Glycine max	1	12.6	5.79e-05	205	34-412 (414)	25-354 (380)
AF-P0ADP5-F1-model_v4	Biotin transporter	Escherichia coli K-12	1	11.2	0.000248	204	53-407 (414)	2-295 (299)
AF-K7V216-F1-model_v4	Nucleotide sugar transporter-KT 1	Zea mays	1	12.3	5.55e-05	204	31-413 (414)	1-313 (332)
AF-Q84L09-F1-model_v4	GDP-mannose transporter GONST2	Arabidopsis thaliana	1	12.7	2.63e-05	204	22-398 (414)	59-374 (375)
AF-I1MMS2-F1-model_v4	WAT1-related protein	Glycine max	1	11.4	0.000164	204	44-407 (414)	12-353 (388)
AF-Q381D0-F1-model_v4	CMP-sialic acid transporter, putative	Trypanosoma brucei brucei TREU927	1	11.3	5.88e-06	204	25-394 (414)	1-439 (441)
AF-K7L7B6-F1-model_v4	TPT domain-containing protein	Glycine max	1	13.7	0.000117	203	46-413 (414)	6-319 (333)
AF-A0A0D2F9B9-F1-model_v4	Unplaced genomic scaffold supercont1.2, whole genome shotgun sequence	Fonsecaea pedrosoi CBS 271.37	1	12.9	2.85e-05	203	50-393 (414)	15-337 (433)
AF-Q90X48-F1-model_v4	Probable UDP-sugar transporter protein SLC35A5	Danio rerio	1	12.7	2.22e-05	203	1-414 (414)	5-419 (440)
AF-Q8I3V1-F1-model_v4	Glideosome-associated protein 40, putative	Plasmodium falciparum 3D7	1	13.9	2.85e-05	203	30-411 (414)	7-342 (456)
AF-P14182-F1-model_v4	Protein LicB	Haemophilus influenzae Rd KW20	1	12.2	9.14e-05	202	50-393 (414)	2-284 (292)
AF-Q5F7C6-F1-model_v4	Membrane protein	Neisseria gonorrhoeae FA 1090	1	11.8	5.33e-05	202	50-405 (414)	9-299 (300)
AF-K7MLS7-F1-model_v4	Uncharacterized protein	Glycine max	1	12	1.88e-05	202	22-407 (414)	2-349 (358)
AF-Q8S8A2-F1-model_v4	At2g05755	Arabidopsis thaliana	1	12.5	2.98e-05	202	2-414 (414)	51-397 (401)
AF-Q1JQ66-F1-model_v4	Solute carrier family 35 member E3	Danio rerio	1	9.4	8.77e-05	201	34-410 (414)	4-311 (313)
AF-Q18779-F1-model_v4	UDP-sugar transporter sqv-7	Caenorhabditis elegans	1	11.4	7.12e-05	201	48-414 (414)	9-312 (329)
AF-Q69V70-F1-model_v4	Os07g0581000 protein	Oryza sativa Japonica Group	1	12.6	0.000104	201	44-412 (414)	12-312 (345)
AF-A0A5S6PMT6-F1-model_v4	BMA-PST-2	Brugia malayi	1	13.3	7.12e-05	201	1-407 (414)	2-345 (369)
AF-A0A1D6JT75-F1-model_v4	GDP-mannose transporter GONST3	Zea mays	1	12.5	1.53e-05	201	3-411 (414)	1-371 (371)
AF-K7N1F3-F1-model_v4	Uncharacterized protein	Glycine max	1	15.8	9.69e-06	201	1-393 (414)	42-414 (428)
AF-Q69M22-F1-model_v4	Os09g0314333 protein	Oryza sativa Japonica Group	1	12.8	7.43e-05	200	45-414 (414)	2-313 (343)
AF-Q6YVJ1-F1-model_v4	WAT1-related protein	Oryza sativa Japonica Group	1	12	5.11e-05	200	32-411 (414)	3-359 (396)
AF-C1H8R0-F1-model_v4	DUF250 domain membrane protein	Paracoccidioides lutzii Pb01	1	12.7	5.11e-05	200	1-409 (414)	20-368 (403)
AF-I1JLT6-F1-model_v4	TPT domain-containing protein	Glycine max	1	8.6	8.77e-05	199	32-408 (414)	1-330 (330)
AF-Q95X47-F1-model_v4	Nucleotide Sugar TransPorter family	Caenorhabditis elegans	1	11.6	1.41e-05	199	30-414 (414)	13-365 (383)
AF-A0A1C1CJP3-F1-model_v4	UDP-N-acetylglucosamine transporter	Cladophialophora carrionii	1	13.4	2.05e-05	199	50-393 (414)	15-337 (431)
AF-P44170-F1-model_v4	Uncharacterized protein HI_1376	Haemophilus influenzae Rd KW20	1	9	0.000113	197	51-400 (414)	3-290 (291)
AF-C0NLA7-F1-model_v4	DUF250 domain-containing protein	Histoplasma capsulatum G186AR	1	14	0.000293	197	140-412 (414)	3-282 (325)
AF-A0A0R0G5Z4-F1-model_v4	TPT domain-containing protein	Glycine max	1	14.2	0.000108	197	46-414 (414)	6-328 (333)
AF-Q61420-F1-model_v4	CMP-sialic acid transporter	Mus musculus	1	11	4.15e-05	197	51-408 (414)	13-336 (336)
AF-A0A1D6EIM3-F1-model_v4	Nucleotide sugar transporter-KT 1	Zea mays	1	12.8	3.66e-05	197	1-413 (414)	1-352 (371)
AF-A1L4X0-F1-model_v4	Protein CLT2, chloroplastic	Arabidopsis thaliana	1	14.6	1.3e-05	197	1-395 (414)	47-419 (431)
AF-A0A0D2DN58-F1-model_v4	Unplaced genomic scaffold supercont1.5, whole genome shotgun sequence	Fonsecaea pedrosoi CBS 271.37	1	11.4	4.51e-05	197	44-414 (414)	3-427 (441)
AF-P78382-F1-model_v4	CMP-sialic acid transporter	Homo sapiens	1	10.9	5.55e-05	196	51-408 (414)	13-336 (337)
AF-Q9UTK8-F1-model_v4	GDP-mannose transporter	Schizosaccharomyces pombe 972h-	1	13.5	8.41e-05	196	31-413 (414)	1-327 (345)
AF-A0A2K6WGR0-F1-model_v4	Uncharacterized protein	Onchocerca volvulus	1	12	7.74e-05	196	52-407 (414)	42-348 (368)
AF-Q5F951-F1-model_v4	Membrane protein	Neisseria gonorrhoeae FA 1090	1	10.1	0.000178	195	53-403 (414)	2-289 (291)
AF-Q8ZK75-F1-model_v4	Putative cationic amino acid transporter	Salmonella enterica subsp. enterica serovar Typhimurium str. LT2	1	12.8	0.000201	195	49-394 (414)	2-306 (321)
AF-Q10Q03-F1-model_v4	Integral membrane family protein, putative, expressed	Oryza sativa Japonica Group	1	11.5	4.51e-05	195	10-411 (414)	2-370 (379)
AF-F8W5I1-F1-model_v4	Solute carrier family 35 member B3	Danio rerio	1	13.4	6.29e-05	195	1-410 (414)	14-377 (386)
AF-Q32A05-F1-model_v4	Uncharacterized protein	Shigella dysenteriae Sd197	1	11.1	0.000619	194	53-407 (414)	2-295 (299)
AF-A0A0G2JZH4-F1-model_v4	Solute carrier family 35 member A1	Rattus norvegicus	1	11.3	5.33e-05	194	51-407 (414)	13-334 (336)
AF-Q4D351-F1-model_v4	CMP-sialic acid transporter, putative	Trypanosoma cruzi strain CL Brener	1	13.4	3.37e-05	193	32-394 (414)	1-410 (412)
AF-Q9Y2D2-F1-model_v4	UDP-N-acetylglucosamine transporter	Homo sapiens	1	13.5	7.74e-05	192	48-393 (414)	2-312 (325)
AF-Q8IIM9-F1-model_v4	UDP-galactose transporter, putative	Plasmodium falciparum 3D7	1	10.7	0.00021	192	22-408 (414)	1-343 (343)
AF-A0A0N4UJW6-F1-model_v4	TPT domain-containing protein	Dracunculus medinensis	1	13	2.74e-05	192	48-411 (414)	6-340 (360)
AF-Q9S845-F1-model_v4	GDP-mannose transporter GONST3	Arabidopsis thaliana	1	11	4.33e-05	192	4-411 (414)	1-357 (372)
AF-D4AAG3-F1-model_v4	Solute carrier family 35 member B3	Rattus norvegicus	1	13.7	3.82e-05	192	1-411 (414)	36-406 (411)
AF-Q02334-F1-model_v4	UDP-galactose translocator 1	Caenorhabditis elegans	1	12.5	6.83e-05	189	1-394 (414)	1-351 (355)
AF-A0A368UGY7-F1-model_v4	WAT1-related protein	Glycine max	1	15.2	4.15e-05	189	39-414 (414)	2-349 (375)
AF-Q6K8S7-F1-model_v4	CMP-sialic acid transporter 5	Oryza sativa Japonica Group	1	12.9	7.43e-05	189	46-414 (414)	38-389 (405)
AF-B4FW73-F1-model_v4	CMP-sialic acid transporter 3	Zea mays	1	13.7	7.12e-05	189	34-414 (414)	25-381 (405)
AF-Q5Z9H6-F1-model_v4	WAT1-related protein	Oryza sativa Japonica Group	1	14.8	3.37e-05	189	41-414 (414)	33-403 (413)
AF-Q922Q5-F1-model_v4	Adenosine 3'-phospho 5'-phosphosulfate transporter 2	Mus musculus	1	15.3	6.83e-05	188	3-407 (414)	13-357 (369)
AF-Q4DY98-F1-model_v4	Uncharacterized protein	Trypanosoma cruzi strain CL Brener	1	11.7	0.000113	188	1-414 (414)	66-496 (541)
AF-I1LIF3-F1-model_v4	WAT1-related protein	Glycine max	1	12.2	0.000228	187	38-414 (414)	2-361 (390)
AF-I1LFJ5-F1-model_v4	Uncharacterized protein	Glycine max	1	13	0.000108	187	29-412 (414)	17-374 (403)
AF-I1NJB5-F1-model_v4	Uncharacterized protein	Glycine max	1	13.4	0.000139	187	46-412 (414)	37-374 (403)
AF-Q7X7C4-F1-model_v4	CMP-sialic acid transporter 4	Oryza sativa Japonica Group	1	12.8	9.94e-05	187	46-414 (414)	38-365 (405)
AF-K7MLL3-F1-model_v4	WAT1-related protein	Glycine max	1	14	0.000938	185	37-414 (414)	5-287 (294)
AF-A0A1D6KSV5-F1-model_v4	Nucleotide/sugar transporter family protein	Zea mays	1	12.9	0.000219	185	47-414 (414)	6-314 (400)
AF-K0F565-F1-model_v4	Uncharacterized protein	Nocardia brasiliensis ATCC 700358	1	12.2	0.000318	183	50-395 (414)	2-286 (287)
AF-A0A1D6JR40-F1-model_v4	Purine permease 3	Zea mays	1	14.7	0.000139	183	167-407 (414)	34-297 (312)
AF-Q8R1T4-F1-model_v4	UDP-N-acetylglucosamine transporter	Mus musculus	1	14.4	0.000258	183	48-393 (414)	2-313 (326)
AF-B6UBN6-F1-model_v4	CMP-sialic acid transporter 3	Zea mays	1	12.6	0.000133	183	47-414 (414)	35-373 (399)
AF-Q9C5H6-F1-model_v4	CMP-sialic acid transporter 3	Arabidopsis thaliana	1	12.1	0.000269	183	46-407 (414)	37-366 (405)
AF-Q4DWM9-F1-model_v4	Uncharacterized protein	Trypanosoma cruzi strain CL Brener	1	10.9	3.37e-05	183	1-401 (414)	238-619 (631)
AF-Q10SL9-F1-model_v4	Os03g0118200 protein	Oryza sativa Japonica Group	1	12.5	0.000444	180	52-407 (414)	24-324 (349)
AF-K7M9H8-F1-model_v4	Uncharacterized protein	Glycine max	1	11.1	0.000318	180	34-414 (414)	7-335 (351)
AF-C0NUF5-F1-model_v4	UDP-Glc/Gal endoplasmic reticulum nucleotide sugar transporter	Histoplasma capsulatum G186AR	1	13	2.85e-05	180	1-412 (414)	3-421 (435)
AF-A0JMG9-F1-model_v4	Probable UDP-sugar transporter protein SLC35A4	Danio rerio	1	11.9	0.000133	179	30-393 (414)	7-312 (314)
AF-Q10354-F1-model_v4	Uncharacterized transporter C22E12.01	Schizosaccharomyces pombe 972h-	1	13.8	0.000293	179	22-407 (414)	7-362 (374)
AF-Q4D963-F1-model_v4	Uncharacterized protein	Trypanosoma cruzi strain CL Brener	1	11	4.7e-05	179	1-401 (414)	238-619 (631)
AF-A0A0N4U1S1-F1-model_v4	Uncharacterized protein	Dracunculus medinensis	1	10	0.000269	178	49-398 (414)	2-289 (290)
AF-I1N3L1-F1-model_v4	Uncharacterized protein	Glycine max	1	13	0.000293	178	54-414 (414)	24-339 (358)
AF-Q8GY97-F1-model_v4	CMP-sialic acid transporter 2	Arabidopsis thaliana	1	13.5	0.000305	178	34-407 (414)	28-368 (406)
AF-A0A3P7E1A7-F1-model_v4	Utp12 domain-containing protein	Wuchereria bancrofti	1	13	0.000258	178	34-398 (414)	13-330 (1170)
AF-A0A0K0DUL8-F1-model_v4	Uncharacterized protein	Strongyloides stercoralis	1	12.4	0.000157	176	32-393 (414)	1-322 (339)
AF-Q5A477-F1-model_v4	GDP-mannose transporter	Candida albicans SC5314	1	13.7	0.000157	176	23-412 (414)	38-370 (371)
AF-A0A1C1CIB1-F1-model_v4	UDP-galactose transporter	Cladophialophora carrionii	1	11.3	0.000185	176	50-414 (414)	17-393 (451)
AF-Q4DSV0-F1-model_v4	Uncharacterized protein	Trypanosoma cruzi strain CL Brener	1	9.9	0.000503	176	50-401 (414)	284-613 (654)
AF-A0A077ZL22-F1-model_v4	Solute carrier family 35 member B1	Trichuris trichiura	1	14.1	0.000219	175	10-408 (414)	1-342 (342)
AF-Q65XA4-F1-model_v4	Os05g0115700 protein	Oryza sativa Japonica Group	1	11	0.00021	175	3-414 (414)	1-355 (360)
AF-K7KU88-F1-model_v4	Uncharacterized protein	Glycine max	1	11.6	0.000408	174	34-414 (414)	2-342 (345)
AF-Q29Q28-F1-model_v4	UDP-galactose/UDP-glucose transporter 2	Arabidopsis thaliana	1	13.9	0.000524	174	52-414 (414)	22-317 (345)
AF-A3A395-F1-model_v4	Os02g0154600 protein	Oryza sativa Japonica Group	1	12	0.000157	174	22-411 (414)	2-360 (369)
AF-A0A0N4UPK2-F1-model_v4	Uncharacterized protein	Dracunculus medinensis	1	12.9	0.000164	174	22-403 (414)	72-428 (429)
AF-P78383-F1-model_v4	Solute carrier family 35 member B1	Homo sapiens	1	13.5	0.000408	172	53-412 (414)	16-321 (322)
AF-Q5N855-F1-model_v4	CMP-sialic acid transporter 3	Oryza sativa Japonica Group	1	10.9	0.000938	172	47-401 (414)	38-354 (402)
AF-C1GTJ8-F1-model_v4	Integral membrane protein	Paracoccidioides lutzii Pb01	1	12.2	0.000193	171	80-394 (414)	39-408 (437)
AF-A0A0D2DKB6-F1-model_v4	Unplaced genomic scaffold supercont1.5, whole genome shotgun sequence	Fonsecaea pedrosoi CBS 271.37	1	12.7	9.53e-05	171	1-407 (414)	41-470 (527)
AF-Q8MXJ9-F1-model_v4	Adenosine 3'-phospho 5'-phosphosulfate transporter 1	Caenorhabditis elegans	1	11.7	0.000228	169	31-411 (414)	94-424 (425)
AF-D3KFW6-F1-model_v4	Uncharacterized protein	Caenorhabditis elegans	1	12.7	0.000444	167	29-404 (414)	1-315 (317)
AF-A0A3Q0KH14-F1-model_v4	Putative sugar transporter	Schistosoma mansoni	1	11.6	0.000133	165	78-393 (414)	15-286 (305)
AF-Q7Z5S9-F1-model_v4	Transmembrane protein 144	Homo sapiens	1	12.5	0.0012	165	42-395 (414)	2-342 (345)
AF-A0A077ZB04-F1-model_v4	Adenosine 3' phospho 5' phosphosulfate	Trichuris trichiura	1	11.7	0.000269	165	27-414 (414)	77-417 (420)
AF-I1L6P8-F1-model_v4	Uncharacterized protein	Glycine max	1	13	0.000645	164	54-414 (414)	24-334 (358)
AF-A0A0R0JEJ3-F1-model_v4	Uncharacterized protein	Glycine max	1	16.9	7.12e-05	164	1-414 (414)	33-408 (408)
AF-Q66HX0-F1-model_v4	Solute carrier family 35 member B1	Danio rerio	1	15.3	0.000673	163	49-414 (414)	18-329 (329)
AF-A0A175VX10-F1-model_v4	UDP-galactose transporter	Madurella mycetomatis	1	10.6	0.000524	163	50-413 (414)	18-406 (464)
AF-Q4DAX9-F1-model_v4	Uncharacterized protein	Trypanosoma cruzi strain CL Brener	1	12.6	0.0009	162	1-393 (414)	1-330 (344)
AF-A0A368UHH3-F1-model_v4	Uncharacterized protein	Glycine max	1	11.8	0.000863	162	13-414 (414)	1-337 (354)
AF-A0A0R0JIT8-F1-model_v4	TPT domain-containing protein	Glycine max	1	11.1	0.000201	162	1-414 (414)	37-372 (881)
AF-A0A3Q0KSV0-F1-model_v4	Putative udp-galactose transporter	Schistosoma mansoni	1	13.4	0.00111	161	48-407 (414)	2-330 (336)
AF-K7M3B4-F1-model_v4	Uncharacterized protein	Glycine max	1	11.1	0.000863	161	25-414 (414)	7-336 (352)
AF-A0A0K0DUN9-F1-model_v4	Uncharacterized protein	Strongyloides stercoralis	1	11.1	0.00198	159	47-395 (414)	2-350 (352)
AF-A0A1D6FVL5-F1-model_v4	UDP-galactose/UDP-glucose transporter 5	Zea mays	1	11.9	0.000673	159	25-414 (414)	1-344 (359)
AF-A0A1C1C6Q3-F1-model_v4	Putative transporter C22E12.01	Cladophialophora carrionii	1	13.2	0.000128	159	1-407 (414)	46-460 (523)
AF-A0A1D6LHJ2-F1-model_v4	UDP-galactose/UDP-glucose transporter 5	Zea mays	1	11.1	0.000938	158	32-413 (414)	1-334 (349)
AF-A0A1D6PL30-F1-model_v4	UDP-galactose/UDP-glucose transporter 4	Zea mays	1	12.9	0.000863	158	48-414 (414)	23-354 (368)
AF-A0A175W8T8-F1-model_v4	Putative nucleotide-sugar transporter YMD8	Madurella mycetomatis	1	12.8	0.000219	158	1-414 (414)	118-557 (614)
AF-Q9VDD7-F1-model_v4	Solute carrier family 35 member B1 homolog	Drosophila melanogaster	1	12.8	0.00182	157	48-414 (414)	6-322 (338)
AF-A0A077YZV9-F1-model_v4	GDP fucose transporter 1	Trichuris trichiura	1	13.6	0.00106	157	53-407 (414)	12-330 (340)
AF-Q6NM25-F1-model_v4	UDP-galactose/UDP-glucose transporter 5	Arabidopsis thaliana	1	10.8	0.00168	157	29-414 (414)	1-334 (347)
AF-C1GRN1-F1-model_v4	Solute carrier family 35 member C2	Paracoccidioides lutzii Pb01	1	13.2	0.000248	157	32-414 (414)	204-562 (739)
AF-Q9VEI3-F1-model_v4	Adenosine 3'-phospho 5'-phosphosulfate transporter 1	Drosophila melanogaster	1	9.6	0.000444	156	15-414 (414)	120-464 (465)
AF-A0A368UHY0-F1-model_v4	WAT1-related protein	Glycine max	1	11.9	0.00537	155	50-414 (414)	8-292 (323)
AF-Q9LDX3-F1-model_v4	UDP-galactose/UDP-glucose transporter 4	Arabidopsis thaliana	1	13.6	0.0019	155	54-392 (414)	26-310 (349)
AF-A0A0N4UF49-F1-model_v4	Uncharacterized protein	Dracunculus medinensis	1	15.3	0.00437	153	185-407 (414)	3-228 (245)
AF-A0A0N4U9W1-F1-model_v4	Uncharacterized protein	Dracunculus medinensis	1	11.7	0.000463	153	30-394 (414)	12-298 (302)
AF-B3DIQ6-F1-model_v4	Solute carrier family 35 member A1	Danio rerio	1	12.9	0.000828	152	45-414 (414)	9-336 (337)
AF-A0A5S6PMM1-F1-model_v4	BMA-PST-2	Brugia malayi	1	10.9	0.00154	152	44-414 (414)	39-340 (345)
AF-I1LQU6-F1-model_v4	Uncharacterized protein	Glycine max	1	11.4	0.00131	152	23-414 (414)	1-336 (353)
AF-A0A0R0IJU7-F1-model_v4	Uncharacterized protein	Glycine max	1	12.7	0.000938	152	1-412 (414)	20-402 (787)
AF-Q6NMB6-F1-model_v4	UDP-galactose/UDP-glucose transporter 5B	Arabidopsis thaliana	1	11.9	0.00276	149	29-414 (414)	1-342 (344)
AF-A4HWI2-F1-model_v4	Nucleotide_sugar_transporter_-_putative	Leishmania infantum	1	10.6	0.000444	147	1-393 (414)	89-443 (461)
AF-O62221-F1-model_v4	Uncharacterized protein	Caenorhabditis elegans	1	14.3	0.0034	139	13-405 (414)	3-329 (330)
AF-U7PLZ3-F1-model_v4	TPT domain-containing protein	Sporothrix schenckii ATCC 58251	1	13.2	0.00057	138	15-414 (414)	196-627 (681)
AF-Q9U3C0-F1-model_v4	Uncharacterized protein	Caenorhabditis elegans	1	10.5	0.0129	133	45-398 (414)	11-350 (351)
AF-A0A044V9P1-F1-model_v4	Uncharacterized protein	Onchocerca volvulus	1	11	0.00276	131	44-395 (414)	2-353 (357)
AF-Q6P101-F1-model_v4	Slc35b2 protein	Danio rerio	1	12	0.00244	131	30-413 (414)	102-435 (435)
AF-A0A0I9N741-F1-model_v4	Bm3811	Brugia malayi	1	9.5	0.00749	128	44-414 (414)	6-308 (308)
AF-Q53RH9-F1-model_v4	Os03g0702700 protein	Oryza sativa Japonica Group	1	10.7	0.0412	123	66-299 (414)	25-205 (206)
AF-A0A0K0EE59-F1-model_v4	GDP-D-mannose dehydratase	Strongyloides stercoralis	1	14.5	0.00609	123	44-389 (414)	3-276 (628)
AF-A0A0N4UFV7-F1-model_v4	Uncharacterized protein	Dracunculus medinensis	1	10.5	0.00885	121	44-407 (414)	5-303 (305)
AF-A0A3P7FSR6-F1-model_v4	Uncharacterized protein	Wuchereria bancrofti	1	14.7	0.025	119	185-407 (414)	3-224 (248)
AF-A0A0R0K4Y7-F1-model_v4	Uncharacterized protein	Glycine max	1	15	0.0364	118	73-346 (414)	5-236 (243)
AF-Q6ZD70-F1-model_v4	Os08g0107400 protein	Oryza sativa Japonica Group	1	13.4	0.014	118	2-346 (414)	59-342 (350)
AF-A0A1I9LQ57-F1-model_v4	Solute carrier family 35 protein (DUF914)	Arabidopsis thaliana	1	15.8	0.00749	117	35-326 (414)	16-255 (257)
AF-Q8TB61-F1-model_v4	Adenosine 3'-phospho 5'-phosphosulfate transporter 1	Homo sapiens	1	11.4	0.00635	117	20-414 (414)	82-430 (432)
AF-A0A0K0JIV1-F1-model_v4	Bm5422	Brugia malayi	1	10.4	0.00635	116	44-395 (414)	2-353 (357)
AF-Q23189-F1-model_v4	Uncharacterized protein	Caenorhabditis elegans	1	12.5	0.0195	115	167-394 (414)	17-305 (312)
AF-Q91ZN5-F1-model_v4	Adenosine 3'-phospho 5'-phosphosulfate transporter 1	Mus musculus	1	10.4	0.0146	115	44-414 (414)	105-429 (431)
AF-Q4DTG7-F1-model_v4	Uncharacterized protein	Trypanosoma cruzi strain CL Brener	1	10.4	0.0283	115	53-407 (414)	16-433 (444)
AF-Q4D8B7-F1-model_v4	Uncharacterized protein	Trypanosoma cruzi strain CL Brener	1	10.2	0.0624	107	30-407 (414)	50-483 (494)
AF-Q587G8-F1-model_v4	Uncharacterized protein	Trypanosoma brucei brucei TREU927	1	9.5	0.0412	95	48-403 (414)	18-447 (448)
AF-A0A1D6FNV7-F1-model_v4	Triose phosphate/phosphate translocator TPT chloroplastic	Zea mays	0.6	10.5	4.91	54	22-276 (414)	29-213 (216)

## Sheet: AFDB-SWISSPROT
Target	Description	Scientific Name	Prob.	Seq. Id.	E-Value	Score	Query Pos.	Target Pos.
AF-A6QL92-F1-model_v4	Solute carrier family 35 member F5	Bos taurus	1	25.7	6.76e-19	833	1-414 (414)	1-499 (524)
AF-Q5R6J3-F1-model_v4	Solute carrier family 35 member F5	Pongo abelii	1	24.3	1.21e-18	810	1-414 (414)	1-498 (523)
AF-Q8R314-F1-model_v4	Solute carrier family 35 member F5	Mus musculus	1	25.1	1.49e-18	804	1-414 (414)	1-499 (524)
AF-Q03730-F1-model_v4	Uncharacterized vacuolar membrane protein YML018C	Saccharomyces cerevisiae S288C	1	27.2	6.38e-18	803	38-414 (414)	3-393 (393)
AF-Q8WV83-F1-model_v4	Solute carrier family 35 member F5	Homo sapiens	1	25.8	1.69e-18	791	1-414 (414)	1-498 (523)
AF-O94654-F1-model_v4	Uncharacterized transporter C405.03c	Schizosaccharomyces pombe 972h-	1	30.2	1.9e-15	677	42-400 (414)	3-340 (341)
AF-Q04083-F1-model_v4	Thiamine-repressible mitochondrial transport protein THI74	Saccharomyces cerevisiae S288C	1	27.5	3.63e-14	569	40-413 (414)	2-367 (370)
AF-A4IF30-F1-model_v4	Solute carrier family 35 member F4	Homo sapiens	1	20.2	2.17e-13	533	1-407 (414)	106-487 (521)
AF-Q8BZK4-F1-model_v4	Solute carrier family 35 member F4	Mus musculus	1	20.1	5.41e-13	523	1-407 (414)	67-451 (485)
AF-Q4R794-F1-model_v4	Solute carrier family 35 member F5	Macaca fascicularis	1	34.8	3.92e-11	520	167-414 (414)	148-407 (432)
AF-Q8IY50-F1-model_v4	Putative thiamine transporter SLC35F3	Homo sapiens	1	19.5	1.3e-12	500	1-414 (414)	27-402 (421)
AF-Q1LZI2-F1-model_v4	Putative thiamine transporter SLC35F3	Mus musculus	1	18.5	1.96e-12	496	1-407 (414)	27-390 (421)
AF-P38943-F1-model_v4	Uncharacterized transporter CKL_3017	Clostridium kluyveri DSM 555	1	13.5	1.21e-08	422	50-414 (414)	3-311 (311)
AF-Q07835-F1-model_v4	Uncharacterized transporter YxxF	Bacillus subtilis subsp. subtilis str. 168	1	13.1	7.07e-09	420	25-414 (414)	1-311 (311)
AF-O26929-F1-model_v4	Uncharacterized transporter MTH_841	Methanothermobacter thermautotrophicus str. Delta H	1	13	1.04e-09	420	1-397 (414)	2-342 (343)
AF-Q9VR50-F1-model_v4	Solute carrier family 35 member E1 homolog	Drosophila melanogaster	1	15	4.94e-10	420	40-414 (414)	3-323 (373)
AF-P42243-F1-model_v4	Uncharacterized transporter YcbK	Bacillus subtilis subsp. subtilis str. 168	1	13.3	2.46e-08	413	39-401 (414)	3-309 (312)
AF-Q9HUX6-F1-model_v4	Pseudopaline exporter CntI	Pseudomonas aeruginosa PAO1	1	14.5	2.56e-08	406	51-398 (414)	9-283 (284)
AF-A6QM03-F1-model_v4	GDP-fucose transporter 1	Bos taurus	1	14.1	5.74e-09	401	16-412 (414)	16-357 (364)
AF-Q550W6-F1-model_v4	GDP-fucose transporter 1	Dictyostelium discoideum	1	14.2	4.86e-09	399	33-402 (414)	52-367 (368)
AF-A0A0H2ZHZ4-F1-model_v4	Pseudopaline exporter CntI	Pseudomonas aeruginosa UCBPP-PA14	1	14.8	4.99e-08	396	51-398 (414)	9-283 (284)
AF-O33787-F1-model_v4	Uncharacterized inner membrane transporter YicL	Salmonella enterica subsp. enterica serovar Typhimurium str. LT2	1	15.8	1.62e-08	394	47-403 (414)	3-299 (300)
AF-Q9M5A9-F1-model_v4	Glucose-6-phosphate/phosphate translocator 1, chloroplastic	Arabidopsis thaliana	1	13.6	2.5e-09	391	1-394 (414)	47-384 (388)
AF-A9UUB8-F1-model_v4	GDP-fucose transporter 1	Monosiga brevicollis	1	16.3	6.78e-09	389	35-414 (414)	3-330 (333)
AF-P0AA73-F1-model_v4	Uncharacterized inner membrane transporter YhbE	Escherichia coli K-12	1	15.8	5.89e-08	387	47-414 (414)	4-318 (321)
AF-Q8BLX4-F1-model_v4	GDP-fucose transporter 1	Mus musculus	1	13.2	2.08e-08	384	42-413 (414)	34-355 (363)
AF-P0AA75-F1-model_v4	Uncharacterized inner membrane transporter YhbE	Shigella flexneri	1	15.1	4.22e-08	382	46-412 (414)	3-320 (321)
AF-Q8N357-F1-model_v4	Solute carrier family 35 member F6	Homo sapiens	1	14.2	7.07e-09	382	48-414 (414)	7-352 (371)
AF-Q5VQL3-F1-model_v4	Phosphoenolpyruvate/phosphate translocator 3, chloroplastic	Oryza sativa Japonica Group	1	14	5.51e-09	382	1-401 (414)	40-387 (393)
AF-Q8RXN3-F1-model_v4	Phosphoenolpyruvate/phosphate translocator 1, chloroplastic	Arabidopsis thaliana	1	15.1	2.72e-09	379	1-414 (414)	56-408 (408)
AF-P52178-F1-model_v4	Triose phosphate/phosphate translocator, non-green plastid, chloroplastic	Brassica oleracea var. botrytis	1	14.3	3.95e-09	377	1-414 (414)	59-402 (402)
AF-Q9NQQ7-F1-model_v4	Solute carrier family 35 member C2	Homo sapiens	1	13.3	1.12e-08	374	36-414 (414)	2-332 (365)
AF-Q94GB1-F1-model_v4	Purine permease 2	Arabidopsis thaliana	1	13.2	2.08e-08	373	48-414 (414)	4-355 (358)
AF-P31437-F1-model_v4	Uncharacterized inner membrane transporter YicL	Escherichia coli K-12	1	17.1	2.46e-08	372	46-411 (414)	2-305 (307)
AF-Q968A5-F1-model_v4	GDP-fucose transporter	Caenorhabditis elegans	1	14.1	3.16e-08	372	33-412 (414)	5-343 (363)
AF-Q5RFT1-F1-model_v4	Solute carrier family 35 member F6	Pongo abelii	1	13.7	9.07e-09	372	48-414 (414)	7-355 (371)
AF-P78381-F1-model_v4	UDP-galactose translocator	Homo sapiens	1	15.2	5.51e-09	372	1-414 (414)	1-360 (396)
AF-P0AA74-F1-model_v4	Uncharacterized inner membrane transporter YhbE	Escherichia coli O157:H7	1	15.2	7.56e-08	371	48-412 (414)	5-320 (321)
AF-P0CK96-F1-model_v4	Solute carrier family 35 member E2B	Homo sapiens	1	14.1	5.99e-09	371	1-414 (414)	18-394 (405)
AF-Q96K37-F1-model_v4	Solute carrier family 35 member E1	Homo sapiens	1	14.5	7.07e-09	371	25-407 (414)	9-346 (410)
AF-Q68XV0-F1-model_v4	S-adenosylmethionine uptake transporter	Rickettsia typhi str. Wilmington	1	12.8	1.89e-07	369	44-408 (414)	4-294 (294)
AF-Q9VHT4-F1-model_v4	GDP-fucose transporter 1	Drosophila melanogaster	1	13.1	3.89e-08	369	33-407 (414)	3-329 (337)
AF-Q96A29-F1-model_v4	GDP-fucose transporter 1	Homo sapiens	1	15.1	2.36e-08	369	31-411 (414)	19-351 (364)
AF-Q69VR7-F1-model_v4	Phosphoenolpyruvate/phosphate translocator 1, chloroplastic	Oryza sativa Japonica Group	1	14.7	4.47e-09	367	1-414 (414)	36-408 (408)
AF-Q9ZUH3-F1-model_v4	Probable purine permease 5	Arabidopsis thaliana	1	11.2	1.49e-08	365	16-411 (414)	1-361 (361)
AF-Q92JG1-F1-model_v4	S-adenosylmethionine uptake transporter	Rickettsia conorii str. Malish 7	1	12.7	1.41e-07	364	44-408 (414)	4-294 (294)
AF-Q94B38-F1-model_v4	Glucose-6-phosphate/phosphate translocator 2, chloroplastic	Arabidopsis thaliana	1	13.1	4.86e-09	363	1-394 (414)	51-384 (388)
AF-A7S1L6-F1-model_v4	GDP-fucose transporter 1	Nematostella vectensis	1	11.7	6.95e-08	362	29-407 (414)	1-322 (339)
AF-Q58DA6-F1-model_v4	UDP-galactose translocator	Bos taurus	1	14.9	3.21e-09	362	1-414 (414)	1-359 (393)
AF-Q8VE96-F1-model_v4	Solute carrier family 35 member F6	Mus musculus	1	14.9	8.01e-09	361	48-404 (414)	7-349 (372)
AF-Q9FZ96-F1-model_v4	Purine permease 1	Arabidopsis thaliana	1	12.1	3.03e-08	360	47-414 (414)	2-344 (356)
AF-Q93890-F1-model_v4	UDP-galactose/UDP-N-acetylglucosamine transporter srf-3	Caenorhabditis elegans	1	11	1.84e-08	360	1-412 (414)	2-361 (368)
AF-Q8CD26-F1-model_v4	Solute carrier family 35 member E1	Mus musculus	1	16.2	8.01e-09	358	22-411 (414)	5-351 (409)
AF-Q8K3D6-F1-model_v4	Solute carrier family 35 member E4	Mus musculus	1	12.1	3.89e-08	356	1-414 (414)	3-348 (351)
AF-Q84QU8-F1-model_v4	Phosphoenolpyruvate/phosphate translocator 2, chloroplastic	Oryza sativa Japonica Group	1	15	2.46e-08	355	1-414 (414)	35-407 (407)
AF-P0C6B1-F1-model_v4	Solute carrier family 35 member E1	Rattus norvegicus	1	14	8.7e-09	354	3-412 (414)	1-352 (409)
AF-Q9R0M8-F1-model_v4	UDP-galactose translocator	Mus musculus	1	14.9	5.07e-09	353	1-408 (414)	1-354 (390)
AF-Q8C811-F1-model_v4	Solute carrier family 35 member E2A	Mus musculus	1	14.3	6.24e-09	353	1-414 (414)	18-389 (405)
AF-D3YVE8-F1-model_v4	Solute carrier family 35 member G2	Mus musculus	1	12.1	1.49e-08	352	18-414 (414)	66-412 (412)
AF-Q8WMS0-F1-model_v4	UDP-galactose translocator	Canis lupus familiaris	1	15	5.99e-09	351	5-414 (414)	1-360 (397)
AF-Q8H0T6-F1-model_v4	Phosphoenolpyruvate/phosphate translocator 2, chloroplastic	Arabidopsis thaliana	1	13.9	1.69e-08	350	1-414 (414)	31-383 (383)
AF-P31125-F1-model_v4	Probable amino-acid metabolite efflux pump	Escherichia coli K-12	1	14	5.33e-07	349	51-408 (414)	5-299 (299)
AF-P0AA70-F1-model_v4	Uncharacterized inner membrane transporter YedA	Escherichia coli K-12	1	15.4	2.74e-07	349	49-413 (414)	6-302 (306)
AF-P73771-F1-model_v4	Uncharacterized transporter sll1164	Synechocystis sp. PCC 6803 substr. Kazusa	1	17.4	4.78e-08	349	51-413 (414)	17-337 (349)
AF-Q9LFN3-F1-model_v4	Probable sugar phosphate/phosphate translocator At5g11230	Arabidopsis thaliana	1	11.9	8.21e-08	343	28-407 (414)	2-318 (351)
AF-P0ABT9-F1-model_v4	Probable cystine transporter YijE	Escherichia coli CFT073	1	15	6.67e-08	342	49-394 (414)	9-289 (301)
AF-Q9FZ95-F1-model_v4	Purine permease 3	Arabidopsis thaliana	1	14	1.19e-07	342	47-407 (414)	2-331 (351)
AF-Q2M3R5-F1-model_v4	Solute carrier family 35 member G1	Homo sapiens	1	12.8	5.2e-08	342	1-402 (414)	28-364 (365)
AF-P0AA71-F1-model_v4	Uncharacterized inner membrane transporter YedA	Escherichia coli CFT073	1	14.9	4.71e-07	341	49-413 (414)	7-302 (306)
AF-F4IHS9-F1-model_v4	UDP-xylose transporter 1	Arabidopsis thaliana	1	15.1	4.99e-08	340	35-409 (414)	2-309 (342)
AF-O29973-F1-model_v4	Uncharacterized transporter AF_0266	Archaeoglobus fulgidus DSM 4304	1	13.9	9.15e-07	338	51-394 (414)	3-273 (276)
AF-P29370-F1-model_v4	Uncharacterized protein PA1977	Pseudomonas aeruginosa PAO1	1	13.7	2.74e-07	338	50-406 (414)	5-286 (287)
AF-Q5M7A3-F1-model_v4	Solute carrier family 35 member G2	Rattus norvegicus	1	11.5	3.58e-08	338	18-414 (414)	66-412 (412)
AF-O94695-F1-model_v4	Putative transporter C83.11	Schizosaccharomyces pombe 972h-	1	13.7	2.17e-08	338	33-407 (414)	4-323 (449)
AF-Q9FGL0-F1-model_v4	WAT1-related protein At5g47470	Arabidopsis thaliana	1	15.6	1.19e-07	336	34-414 (414)	14-364 (364)
AF-P0AA72-F1-model_v4	Uncharacterized inner membrane transporter YedA	Escherichia coli O157:H7	1	15.8	4.71e-07	334	49-413 (414)	6-302 (306)
AF-O49726-F1-model_v4	Purine permease 21	Arabidopsis thaliana	1	10.5	4.59e-08	334	2-414 (414)	1-377 (390)
AF-Q9LU76-F1-model_v4	Nucleotide-sugar uncharacterized transporter 1	Arabidopsis thaliana	1	13.1	6.4e-08	334	26-409 (414)	46-362 (390)
AF-P96661-F1-model_v4	Uncharacterized transporter YdeD	Bacillus subtilis subsp. subtilis str. 168	1	12.9	1.19e-07	333	46-410 (414)	4-317 (319)
AF-Q94EI9-F1-model_v4	Probable sugar phosphate/phosphate translocator At3g14410	Arabidopsis thaliana	1	13.2	1.14e-07	333	32-414 (414)	1-324 (340)
AF-P39542-F1-model_v4	Uncharacterized transporter YJL193W	Saccharomyces cerevisiae S288C	1	13.4	7.68e-09	333	39-410 (414)	3-402 (402)
AF-Q8BY79-F1-model_v4	Solute carrier family 35 member G1	Mus musculus	1	14.5	1.19e-07	332	1-402 (414)	24-367 (368)
AF-Q8TBE7-F1-model_v4	Solute carrier family 35 member G2	Homo sapiens	1	11.9	3.29e-08	331	1-414 (414)	34-412 (412)
AF-F8JJ22-F1-model_v4	Probable terminal-alkyne amino-acid exporter	Streptantibioticus cattleyicolor NRRL 8057 = DSM 46488	1	14.1	1.97e-07	329	50-412 (414)	5-297 (297)
AF-P0ABT8-F1-model_v4	Probable cystine transporter YijE	Escherichia coli K-12	1	15.6	1.41e-07	327	49-393 (414)	9-288 (301)
AF-F4KHA8-F1-model_v4	WAT1-related protein At5g40230	Arabidopsis thaliana	1	10	3.98e-07	327	31-414 (414)	1-356 (370)
AF-Q8GUJ1-F1-model_v4	UDP-xylose transporter 2	Arabidopsis thaliana	1	15.5	2.67e-08	325	31-407 (414)	1-307 (353)
AF-Q9ZJZ2-F1-model_v4	Uncharacterized transporter jhp_1155	Helicobacter pylori J99	1	14.3	3.82e-07	324	46-404 (414)	3-297 (298)
AF-P74436-F1-model_v4	Uncharacterized transporter sll0355	Synechocystis sp. PCC 6803 substr. Kazusa	1	13.8	1.74e-07	323	32-413 (414)	1-327 (330)
AF-Q8N808-F1-model_v4	Solute carrier family 35 member G3	Homo sapiens	1	12.1	2.23e-07	323	10-408 (414)	2-338 (338)
AF-O49725-F1-model_v4	Probable purine permease 10	Arabidopsis thaliana	1	11.1	9.3e-08	323	29-414 (414)	12-379 (390)
AF-Q9LPF6-F1-model_v4	Probable purine permease 11	Arabidopsis thaliana	1	15	4.78e-08	322	3-412 (414)	1-371 (379)
AF-P87041-F1-model_v4	UDP-galactose transporter	Schizosaccharomyces pombe 972h-	1	11.3	8.92e-08	321	44-394 (414)	16-323 (353)
AF-P49133-F1-model_v4	Triose phosphate/phosphate translocator, chloroplastic	Zea mays	1	11.5	2.56e-08	321	1-408 (414)	65-409 (409)
AF-P29463-F1-model_v4	Triose phosphate/phosphate translocator, chloroplastic	Solanum tuberosum	1	13.1	3.16e-08	321	1-407 (414)	72-411 (414)
AF-Q9SKJ7-F1-model_v4	Probable sugar phosphate/phosphate translocator At2g25520	Arabidopsis thaliana	1	12.8	2.32e-07	320	29-407 (414)	5-322 (347)
AF-Q3E6T0-F1-model_v4	Probable sugar phosphate/phosphate translocator At5g25400	Arabidopsis thaliana	1	12	3.98e-07	320	30-414 (414)	6-326 (349)
AF-Q8VCX2-F1-model_v4	Solute carrier family 35 member C2	Mus musculus	1	14.8	9.3e-08	320	36-401 (414)	2-322 (364)
AF-O30646-F1-model_v4	Protein PagO	Salmonella enterica subsp. enterica serovar Typhimurium str. LT2	1	10.9	9.54e-07	319	48-414 (414)	2-300 (304)
AF-P83936-F1-model_v4	Protein RarD	Streptomyces exfoliatus	1	12.1	5.56e-07	319	46-413 (414)	5-305 (315)
AF-Q9LPU2-F1-model_v4	UDP-rhamnose/UDP-galactose transporter 2	Arabidopsis thaliana	1	13.5	1.24e-07	319	15-414 (414)	2-320 (348)
AF-Q7Z769-F1-model_v4	Solute carrier family 35 member E3	Homo sapiens	1	10.9	1.13e-06	318	36-410 (414)	2-311 (313)
AF-F4JK59-F1-model_v4	WAT1-related protein At4g15540	Arabidopsis thaliana	1	13.9	1.53e-07	318	33-414 (414)	3-345 (347)
AF-P49132-F1-model_v4	Triose phosphate/phosphate translocator, chloroplastic	Flaveria trinervia	1	12	2.46e-08	318	1-407 (414)	61-405 (407)
AF-Q1RKL2-F1-model_v4	S-adenosylmethionine uptake transporter	Rickettsia bellii RML369-C	1	13.1	9.54e-07	317	44-404 (414)	4-290 (291)
AF-Q9C521-F1-model_v4	UDP-galactose transporter 1	Arabidopsis thaliana	1	13.5	1.35e-07	316	46-401 (414)	4-304 (336)
AF-Q9SUV2-F1-model_v4	Probable sugar phosphate/phosphate translocator At4g32390	Arabidopsis thaliana	1	12.5	2.23e-07	316	29-407 (414)	1-322 (350)
AF-Q9SY29-F1-model_v4	Probable purine permease 4	Arabidopsis thaliana	1	13	1.1e-07	316	26-414 (414)	1-360 (382)
AF-P11869-F1-model_v4	Triose phosphate/phosphate translocator, chloroplastic	Spinacia oleracea	1	12	2.36e-08	316	1-407 (414)	58-401 (404)
AF-Q9LF61-F1-model_v4	Xylulose 5-phosphate/phosphate translocator, chloroplastic	Arabidopsis thaliana	1	13.2	4.22e-08	316	1-412 (414)	65-417 (417)
AF-P49131-F1-model_v4	Triose phosphate/phosphate translocator, chloroplastic	Flaveria pringlei	1	12.3	1.92e-08	315	1-407 (414)	62-405 (408)
AF-Q94AP3-F1-model_v4	Protein WALLS ARE THIN 1	Arabidopsis thaliana	1	10.7	3.37e-07	313	53-414 (414)	22-369 (389)
AF-P52177-F1-model_v4	Triose phosphate/phosphate translocator, chloroplastic	Brassica oleracea var. botrytis	1	14.6	4.78e-08	313	1-407 (414)	58-405 (407)
AF-P71360-F1-model_v4	Uncharacterized transporter HI_0878	Haemophilus influenzae Rd KW20	1	13.2	1.28e-06	310	49-401 (414)	6-302 (306)
AF-O07086-F1-model_v4	Uncharacterized transporter YrdR	Bacillus subtilis subsp. subtilis str. 168	1	13.2	4.33e-07	310	46-413 (414)	4-318 (321)
AF-Q9FTT3-F1-model_v4	Triose phosphate/phosphate translocator TPT, chloroplastic	Oryza sativa Japonica Group	1	11.2	3.58e-08	310	1-408 (414)	74-417 (417)
AF-Q9ZE70-F1-model_v4	S-adenosylmethionine uptake transporter	Rickettsia prowazekii str. Madrid E	1	11.6	1.57e-06	308	44-408 (414)	4-294 (294)
AF-Q8RXL8-F1-model_v4	UDP-xylose transporter 3	Arabidopsis thaliana	1	15.5	6.95e-08	308	31-407 (414)	1-307 (357)
AF-Q9SFE9-F1-model_v4	GDP-mannose transporter GONST5	Arabidopsis thaliana	1	13.6	5.79e-07	306	35-414 (414)	2-325 (341)
AF-Q9NTN3-F1-model_v4	UDP-glucuronic acid/UDP-N-acetylgalactosamine transporter	Homo sapiens	1	12.4	3.1e-07	306	15-414 (414)	2-348 (355)
AF-Q9LNH5-F1-model_v4	Probable sugar phosphate/phosphate translocator At1g48230	Arabidopsis thaliana	1	11.7	5.33e-07	306	47-414 (414)	8-336 (367)
AF-Q8BGK5-F1-model_v4	Solute carrier family 35 member F1	Mus musculus	1	12.2	4.78e-08	306	1-414 (414)	8-381 (408)
AF-O25832-F1-model_v4	Uncharacterized transporter HP_1234	Helicobacter pylori 26695	1	14	1.17e-06	304	46-404 (414)	3-297 (298)
AF-Q9FL08-F1-model_v4	WAT1-related protein At5g40240	Arabidopsis thaliana	1	12.5	6.84e-07	304	32-409 (414)	1-353 (368)
AF-Q9C8M1-F1-model_v4	Probable sugar phosphate/phosphate translocator At1g53660	Arabidopsis thaliana	1	11	8.78e-07	302	32-414 (414)	1-324 (332)
AF-P39649-F1-model_v4	Uncharacterized transporter YwfM	Bacillus subtilis subsp. subtilis str. 168	1	16.2	4.51e-07	301	48-394 (414)	3-281 (296)
AF-Q9ZSR7-F1-model_v4	Triose phosphate/phosphate translocator TPT, chloroplastic	Arabidopsis thaliana	1	13.4	3.58e-08	301	1-407 (414)	63-408 (410)
AF-P57368-F1-model_v4	Uncharacterized transporter BU281	Buchnera aphidicola str. APS (Acyrthosiphon pisum)	1	10.8	3.61e-06	299	49-407 (414)	4-305 (307)
AF-Q5F297-F1-model_v4	Solute carrier family 35 member G3	Mus musculus	1	11.9	5.11e-07	299	1-408 (414)	3-340 (340)
AF-Q20787-F1-model_v4	Adenosine 3'-phospho 5'-phosphosulfate transporter 2	Caenorhabditis elegans	1	12.8	6.56e-07	298	1-414 (414)	3-358 (364)
AF-Q56072-F1-model_v4	Probable amino-acid metabolite efflux pump	Salmonella enterica subsp. enterica serovar Typhimurium str. LT2	1	12.7	6.19e-06	297	51-414 (414)	5-298 (299)
AF-Q8RWW7-F1-model_v4	UDP-rhamnose/UDP-galactose transporter 4	Arabidopsis thaliana	1	13.5	6.04e-07	297	34-414 (414)	9-336 (337)
AF-O34416-F1-model_v4	Uncharacterized transporter YoaV	Bacillus subtilis subsp. subtilis str. 168	1	14.6	1.86e-06	296	49-413 (414)	2-292 (292)
AF-Q3UME2-F1-model_v4	Transmembrane protein 241	Mus musculus	1	11.6	3.32e-06	296	45-401 (414)	3-296 (297)
AF-Q8RWL5-F1-model_v4	Protein CLT3, chloroplastic	Arabidopsis thaliana	1	15.6	6.14e-08	296	1-414 (414)	56-443 (452)
AF-Q24JQ0-F1-model_v4	Transmembrane protein 241	Homo sapiens	1	11.3	2.28e-06	295	45-400 (414)	3-295 (296)
AF-O49722-F1-model_v4	Probable purine permease 6	Arabidopsis thaliana	1	12.6	5.56e-07	295	1-412 (414)	1-370 (387)
AF-O59785-F1-model_v4	Uncharacterized solute carrier family 35 member C320.08	Schizosaccharomyces pombe 972h-	1	13.1	1.41e-07	295	1-394 (414)	94-432 (505)
AF-Q9FNA5-F1-model_v4	WAT1-related protein At5g13670	Arabidopsis thaliana	1	13.4	4.71e-07	294	51-414 (414)	8-347 (377)
AF-P21727-F1-model_v4	Triose phosphate/phosphate translocator, chloroplastic	Pisum sativum	1	13	7.56e-08	294	1-407 (414)	51-400 (402)
AF-O29470-F1-model_v4	Uncharacterized transporter AF_0788	Archaeoglobus fulgidus DSM 4304	1	15.2	4.83e-06	292	22-395 (414)	2-306 (308)
AF-Q9FIH5-F1-model_v4	UDP-rhamnose/UDP-galactose transporter 3	Arabidopsis thaliana	1	12	6.04e-07	292	23-414 (414)	1-324 (350)
AF-Q9ZUS1-F1-model_v4	WAT1-related protein At2g37460	Arabidopsis thaliana	1	13.3	2.14e-07	292	36-414 (414)	2-352 (380)
AF-Q8H184-F1-model_v4	Probable sugar phosphate/phosphate translocator At1g06470	Arabidopsis thaliana	1	11.8	5.33e-07	292	1-414 (414)	16-400 (414)
AF-O31540-F1-model_v4	Uncharacterized transporter YetK	Bacillus subtilis subsp. subtilis str. 168	1	13.6	5.11e-07	291	26-395 (414)	1-314 (330)
AF-P0AA67-F1-model_v4	Threonine/homoserine exporter RhtA	Escherichia coli K-12	1	13.5	5.03e-06	290	48-414 (414)	10-290 (295)
AF-P72732-F1-model_v4	Uncharacterized transporter sll1319	Synechocystis sp. PCC 6803 substr. Kazusa	1	12.9	4.26e-06	290	43-414 (414)	3-326 (329)
AF-Q8RY83-F1-model_v4	Probable purine permease 13	Arabidopsis thaliana	1	14	6.04e-07	290	41-408 (414)	31-361 (361)
AF-Q8RY74-F1-model_v4	Probable purine permease 22	Arabidopsis thaliana	1	11.5	6.29e-07	290	22-414 (414)	1-373 (377)
AF-A1L3G4-F1-model_v4	Transmembrane protein 241	Xenopus laevis	1	10.1	2.07e-05	289	51-399 (414)	5-294 (296)
AF-P42394-F1-model_v4	Uncharacterized transporter BUsg_270	Buchnera aphidicola str. Sg (Schizaphis graminum)	1	11.2	1.33e-06	289	47-403 (414)	2-299 (300)
AF-Q6DBP3-F1-model_v4	Probable sugar phosphate/phosphate translocator At5g05820	Arabidopsis thaliana	1	12.8	8.08e-07	289	35-401 (414)	2-308 (309)
AF-Q5T1Q4-F1-model_v4	Solute carrier family 35 member F1	Homo sapiens	1	13.2	7.25e-08	289	1-414 (414)	10-381 (408)
AF-P0AA69-F1-model_v4	Threonine/homoserine exporter RhtA	Escherichia coli O157:H7	1	13.4	5.94e-06	288	48-395 (414)	10-281 (295)
AF-Q9LDH3-F1-model_v4	Probable sugar phosphate/phosphate translocator At1g12500	Arabidopsis thaliana	1	14.5	2.52e-07	288	1-405 (414)	14-360 (361)
AF-Q7ZW46-F1-model_v4	UDP-xylose and UDP-N-acetylglucosamine transporter	Danio rerio	1	12.6	5.79e-07	287	47-414 (414)	2-331 (331)
AF-Q8CIA5-F1-model_v4	UDP-xylose and UDP-N-acetylglucosamine transporter	Mus musculus	1	12.1	5.33e-07	287	48-414 (414)	3-331 (331)
AF-Q9FLL4-F1-model_v4	Putative purine permease 12	Arabidopsis thaliana	1	13.6	5.56e-07	287	29-408 (414)	13-358 (358)
AF-Q9PJG0-F1-model_v4	S-adenosylmethionine/S-adenosylhomocysteine transporter	Chlamydia muridarum str. Nigg	1	12.5	1.51e-06	286	45-401 (414)	4-312 (318)
AF-F4IYZ0-F1-model_v4	WAT1-related protein At3g28080	Arabidopsis thaliana	1	11.1	3.32e-06	286	39-412 (414)	2-344 (358)
AF-Q2V3H2-F1-model_v4	Probable purine permease 7	Arabidopsis thaliana	1	11.7	6.29e-07	286	32-414 (414)	29-381 (390)
AF-F4IJ08-F1-model_v4	WAT1-related protein At2g40900	Arabidopsis thaliana	1	11.8	9.54e-07	286	27-407 (414)	1-336 (394)
AF-O28739-F1-model_v4	Uncharacterized transporter AF_1533	Archaeoglobus fulgidus DSM 4304	1	14.6	5.24e-06	284	50-393 (414)	2-272 (278)
AF-Q5XF09-F1-model_v4	Probable sugar phosphate/phosphate translocator At3g11320	Arabidopsis thaliana	1	13.4	1.17e-06	284	35-400 (414)	2-307 (308)
AF-Q7TML3-F1-model_v4	Solute carrier family 35 member F2	Mus musculus	1	16.2	1.3e-07	284	1-393 (414)	1-332 (375)
AF-P0AA68-F1-model_v4	Threonine/homoserine exporter RhtA	Escherichia coli CFT073	1	13.5	7.95e-06	282	50-395 (414)	12-281 (295)
AF-B0K004-F1-model_v4	Solute carrier family 35 member G3	Rattus norvegicus	1	11.9	6.84e-07	282	2-412 (414)	14-339 (340)
AF-P0CL04-F1-model_v4	Threonine/homoserine exporter RhtA	Salmonella enterica subsp. enterica serovar Typhimurium str. LT2	1	12.9	7.62e-06	281	48-395 (414)	10-281 (295)
AF-Q0Q7U9-F1-model_v4	Solute carrier family 35 member G5	Pan paniscus	1	11.8	2.38e-06	281	1-408 (414)	3-338 (338)
AF-Q6ICL7-F1-model_v4	Solute carrier family 35 member E4	Homo sapiens	1	13.6	7.13e-07	281	1-414 (414)	11-347 (350)
AF-F4I5D5-F1-model_v4	WAT1-related protein At1g70260	Arabidopsis thaliana	1	12.7	7.75e-07	281	37-412 (414)	2-348 (375)
AF-Q9LRP2-F1-model_v4	Probable sugar phosphate/phosphate translocator At3g17430	Arabidopsis thaliana	1	11.6	1.86e-06	281	36-414 (414)	2-336 (375)
AF-Q9SS40-F1-model_v4	Probable sugar phosphate/phosphate translocator At3g10290	Arabidopsis thaliana	1	13.1	1.13e-06	280	1-399 (414)	4-353 (355)
AF-Q0Q7V0-F1-model_v4	Solute carrier family 35 member G3	Pan paniscus	1	12.3	2.19e-06	279	1-408 (414)	8-338 (338)
AF-Q5RKH7-F1-model_v4	Solute carrier family 35 member F6	Rattus norvegicus	1	16.5	4.51e-07	279	48-412 (414)	7-354 (372)
AF-O80638-F1-model_v4	WAT1-related protein At2g39510	Arabidopsis thaliana	1	10.9	2.59e-06	279	55-398 (414)	10-324 (374)
AF-Q9FYE5-F1-model_v4	UDP-URONIC ACID TRANSPORTER 1	Arabidopsis thaliana	1	14.5	4.26e-06	278	31-404 (414)	1-309 (309)
AF-P0C7Q5-F1-model_v4	Putative solute carrier family 35 member G4	Homo sapiens	1	12.5	1.64e-06	278	1-408 (414)	8-338 (338)
AF-Q5M8T2-F1-model_v4	Solute carrier family 35 member D3	Homo sapiens	1	12.9	2.28e-06	277	44-413 (414)	4-318 (416)
AF-E1W9W8-F1-model_v4	Threonine/homoserine exporter RhtA	Salmonella enterica subsp. enterica serovar Typhimurium str. SL1344	1	12.8	1.55e-05	276	48-395 (414)	10-281 (295)
AF-Q9KVF1-F1-model_v4	Uncharacterized transporter VC_0195	Vibrio cholerae O1 biovar El Tor str. N16961	1	11.9	9.78e-06	276	44-408 (414)	6-302 (302)
AF-Q945L4-F1-model_v4	WAT1-related protein At5g40210	Arabidopsis thaliana	1	13.3	2.86e-07	276	39-413 (414)	3-330 (339)
AF-Q09875-F1-model_v4	Uncharacterized protein C12G12.12	Schizosaccharomyces pombe 972h-	1	14.4	1.78e-06	275	50-393 (414)	2-313 (324)
AF-A4IFK2-F1-model_v4	Solute carrier family 35 member E3	Bos taurus	1	9.7	3.05e-06	274	29-410 (414)	1-311 (313)
AF-Q0Q7U8-F1-model_v4	Solute carrier family 35 member G5	Pan troglodytes	1	11.2	2.28e-06	273	22-408 (414)	11-338 (338)
AF-Q9UUI8-F1-model_v4	Uncharacterized transporter C22F8.04	Schizosaccharomyces pombe 972h-	1	13.2	1.14e-07	273	1-408 (414)	14-383 (383)
AF-Q5ZJZ4-F1-model_v4	Solute carrier family 35 member G2	Gallus gallus	1	11.1	2.32e-07	273	1-407 (414)	57-402 (411)
AF-Q54YK1-F1-model_v4	Putative UDP-sugar transporter DDB_G0278631	Dictyostelium discoideum	1	12.7	6.29e-07	272	1-400 (414)	21-381 (382)
AF-Q93V85-F1-model_v4	WAT1-related protein At3g02690, chloroplastic	Arabidopsis thaliana	1	14.8	4.15e-07	272	1-394 (414)	67-411 (417)
AF-Q4UNE6-F1-model_v4	S-adenosylmethionine uptake transporter	Rickettsia felis URRWXCal2	1	12.5	7.02e-06	271	44-408 (414)	4-294 (294)
AF-O32256-F1-model_v4	Uncharacterized transporter YvbV	Bacillus subtilis subsp. subtilis str. 168	1	11.4	3.46e-06	270	51-408 (414)	9-305 (305)
AF-Q9FG70-F1-model_v4	Nucleotide-sugar uncharacterized transporter 2	Arabidopsis thaliana	1	14.5	1.45e-06	269	29-414 (414)	18-363 (398)
AF-O74750-F1-model_v4	UDP-N-acetylglucosamine transporter yea4	Schizosaccharomyces pombe 972h-	1	13.2	2.02e-06	268	48-394 (414)	2-301 (316)
AF-F4J9A3-F1-model_v4	WAT1-related protein At3g53210	Arabidopsis thaliana	1	11.8	2.02e-06	268	48-407 (414)	7-337 (369)
AF-D0ZXP9-F1-model_v4	Methyl viologen resistance protein YddG	Salmonella enterica subsp. enterica serovar Typhimurium str. 14028S	1	13.9	5.7e-06	267	44-395 (414)	3-288 (293)
AF-Q44601-F1-model_v4	Uncharacterized transporter in trpA 3'region	Buchnera aphidicola (Schlechtendalia chinensis)	1	12.3	1.61e-05	267	47-408 (414)	3-304 (304)
AF-Q941R4-F1-model_v4	GDP-mannose transporter GONST1	Arabidopsis thaliana	1	13.1	2.59e-06	267	1-408 (414)	1-333 (333)
AF-Q5ADN8-F1-model_v4	UDP-galactose transporter homolog 1	Candida albicans SC5314	1	13.5	2.81e-06	267	33-414 (414)	6-370 (370)
AF-Q0WRB9-F1-model_v4	Probable purine permease 8	Arabidopsis thaliana	1	11.7	1.51e-06	267	28-414 (414)	29-377 (394)
AF-P0C7Q6-F1-model_v4	Solute carrier family 35 member G6	Homo sapiens	1	11.1	8.64e-06	266	1-408 (414)	8-338 (338)
AF-Q9SUF1-F1-model_v4	WAT1-related protein At4g08290	Arabidopsis thaliana	1	11.2	2.02e-06	265	32-414 (414)	1-350 (384)
AF-Q0Q7U7-F1-model_v4	Solute carrier family 35 member G5	Gorilla gorilla gorilla	1	13.6	6.19e-06	263	1-413 (414)	8-336 (338)
AF-Q96KT7-F1-model_v4	Solute carrier family 35 member G5	Homo sapiens	1	11.6	4.63e-06	263	1-408 (414)	8-338 (338)
AF-Q9LXX8-F1-model_v4	WAT1-related protein At3g56620	Arabidopsis thaliana	1	13.1	8.78e-07	263	28-413 (414)	1-349 (377)
AF-Q12520-F1-model_v4	UDP-galactose transporter homolog 1	Saccharomyces cerevisiae S288C	1	11.2	2.38e-06	262	46-414 (414)	6-339 (339)
AF-Q9W429-F1-model_v4	UDP-xylose and UDP-N-acetylglucosamine transporter	Drosophila melanogaster	1	11.2	6.56e-07	262	47-414 (414)	6-352 (352)
AF-Q5RDC9-F1-model_v4	UDP-N-acetylglucosamine/UDP-glucose/GDP-mannose transporter	Pongo abelii	1	12.4	3.46e-06	262	15-414 (414)	2-348 (355)
AF-Q9SX93-F1-model_v4	Putative purine permease 19	Arabidopsis thaliana	1	12.3	7.13e-07	261	1-412 (414)	2-388 (392)
AF-Q550A6-F1-model_v4	Crt homolog 2	Dictyostelium discoideum	1	10.5	1.53e-07	261	1-414 (414)	1-424 (484)
AF-P46136-F1-model_v4	Aromatic amino acid exporter YddG	Escherichia coli K-12	1	13.8	1.2e-05	260	51-395 (414)	6-288 (293)
AF-P96680-F1-model_v4	Uncharacterized transporter YdfC	Bacillus subtilis subsp. subtilis str. 168	1	15.9	1.08e-06	260	39-407 (414)	3-303 (306)
AF-Q8YAF3-F1-model_v4	Putative sugar uptake protein lmo0176	Listeria monocytogenes EGD-e	1	12.8	5.03e-06	259	51-395 (414)	2-282 (286)
AF-O84584-F1-model_v4	S-adenosylmethionine/S-adenosylhomocysteine transporter	Chlamydia trachomatis D/UW-3/CX	1	12.9	6.19e-06	259	49-400 (414)	23-320 (327)
AF-Q55DM5-F1-model_v4	Adenosine 3'-phospho 5'-phosphosulfate transporter 1	Dictyostelium discoideum	1	11.1	6.73e-06	258	26-403 (414)	1-335 (359)
AF-Q8IXU6-F1-model_v4	Solute carrier family 35 member F2	Homo sapiens	1	15.9	5.79e-07	258	22-394 (414)	2-333 (374)
AF-Q55C66-F1-model_v4	Crt homolog 3	Dictyostelium discoideum	1	10	7.13e-07	258	1-414 (414)	10-421 (478)
AF-Q92F91-F1-model_v4	Putative sugar uptake protein lin0215	Listeria innocua Clip11262	1	12.2	5.47e-06	256	51-395 (414)	2-282 (286)
AF-Q29EY2-F1-model_v4	Adenosine 3'-phospho 5'-phosphosulfate transporter 2	Drosophila pseudoobscura pseudoobscura	1	15.9	5.11e-07	256	1-414 (414)	1-391 (392)
AF-Q8AWB6-F1-model_v4	Solute carrier family 35 member B1	Gallus gallus	1	11.8	5.94e-06	255	23-394 (414)	1-314 (325)
AF-A2AKQ0-F1-model_v4	UDP-glucuronic acid/UDP-N-acetylgalactosamine transporter	Mus musculus	1	12.8	2.28e-06	255	1-414 (414)	5-348 (355)
AF-Q8WZJ9-F1-model_v4	UDP-galactose transporter homolog 1	Schizosaccharomyces pombe 972h-	1	10.7	1.82e-05	254	45-410 (414)	2-319 (322)
AF-Q15B89-F1-model_v4	UDP-N-acetylglucosamine/UDP-glucose/GDP-mannose transporter	Sus scrofa	1	12	8.64e-06	253	26-414 (414)	1-336 (343)
AF-Q9SRE4-F1-model_v4	UDP-rhamnose/UDP-galactose transporter 1	Arabidopsis thaliana	1	11.6	5.03e-06	253	31-414 (414)	2-319 (347)
AF-Q8BGF8-F1-model_v4	Solute carrier family 35 member D3	Mus musculus	1	13.2	8.64e-06	253	44-407 (414)	4-310 (422)
AF-Q6ZL17-F1-model_v4	CMP-sialic acid transporter 2	Oryza sativa Japonica Group	1	15.2	1.64e-06	251	12-395 (414)	16-349 (356)
AF-Q76EJ3-F1-model_v4	UDP-N-acetylglucosamine/UDP-glucose/GDP-mannose transporter	Homo sapiens	1	15.4	2.93e-06	249	11-413 (414)	1-332 (337)
AF-Q5RKL7-F1-model_v4	Solute carrier family 35 member E4	Rattus norvegicus	1	12.3	7.02e-06	249	22-414 (414)	4-347 (350)
AF-Q95YI5-F1-model_v4	UDP-sugar transporter UST74c	Drosophila melanogaster	1	13	2.02e-06	249	34-413 (414)	46-365 (373)
AF-Q9FL41-F1-model_v4	WAT1-related protein At5g07050	Arabidopsis thaliana	1	11	3.18e-06	249	31-413 (414)	2-360 (402)
AF-P37511-F1-model_v4	Uncharacterized transporter YyaM	Bacillus subtilis subsp. subtilis str. 168	1	15.4	4.44e-06	248	51-414 (414)	6-302 (305)
AF-B0B8F4-F1-model_v4	S-adenosylmethionine/S-adenosylhomocysteine transporter	Chlamydia trachomatis 434/Bu	1	12.4	6.73e-06	247	34-401 (414)	2-321 (327)
AF-Q9LV20-F1-model_v4	WAT1-related protein At3g18200	Arabidopsis thaliana	1	13.8	3.92e-06	247	34-411 (414)	18-364 (383)
AF-Q8YAF7-F1-model_v4	Putative sugar uptake protein lmo0169	Listeria monocytogenes EGD-e	1	11.6	1.75e-05	246	51-395 (414)	2-282 (285)
AF-P35206-F1-model_v4	Mannosyl phosphorylinositol ceramide synthase regulatory protein CSG2	Saccharomyces cerevisiae S288C	1	12	2.19e-06	246	51-402 (414)	3-408 (410)
AF-O31448-F1-model_v4	Uncharacterized transporter YbhF	Bacillus subtilis subsp. subtilis str. 168	1	13.5	1.2e-05	245	45-413 (414)	3-297 (306)
AF-Q08794-F1-model_v4	Uncharacterized transporter YcxC	Bacillus subtilis subsp. subtilis str. 168	1	13.8	7.95e-06	245	47-394 (414)	9-296 (312)
AF-A2VE55-F1-model_v4	UDP-N-acetylglucosamine/UDP-glucose/GDP-mannose transporter	Bos taurus	1	14.3	2.02e-06	245	15-414 (414)	2-348 (355)
AF-F4JMI7-F1-model_v4	WAT1-related protein At4g16620	Arabidopsis thaliana	1	12.7	5.47e-06	245	37-413 (414)	2-357 (359)
AF-Q762D5-F1-model_v4	UDP-N-acetylglucosamine/UDP-glucose/GDP-mannose transporter	Mus musculus	1	15	4.63e-06	244	48-414 (414)	12-316 (326)
AF-Q9SX90-F1-model_v4	Putative purine permease 20	Arabidopsis thaliana	1	12.1	3.32e-06	244	1-413 (414)	2-386 (389)
AF-Q9C654-F1-model_v4	Probable purine permease 23	Arabidopsis thaliana	1	11.9	1.28e-06	242	1-407 (414)	1-383 (394)
AF-A8MRY9-F1-model_v4	UDP-N-acetylglucosamine transporter UGNT1	Arabidopsis thaliana	1	15.2	4.09e-06	241	1-399 (414)	2-342 (344)
AF-Q9LI65-F1-model_v4	WAT1-related protein At3g30340	Arabidopsis thaliana	1	10.1	1.2e-05	241	47-414 (414)	7-343 (364)
AF-Q94JU2-F1-model_v4	WAT1-related protein At3g28050	Arabidopsis thaliana	1	13	2.1e-06	240	49-414 (414)	10-351 (367)
AF-Q9GSB0-F1-model_v4	Crt homolog 1	Dictyostelium discoideum	1	12.1	7.43e-07	240	1-407 (414)	1-411 (473)
AF-Q92F94-F1-model_v4	Putative sugar uptake protein lin0212	Listeria innocua Clip11262	1	11.1	2.77e-05	239	51-395 (414)	2-282 (285)
AF-Q8GXB4-F1-model_v4	WAT1-related protein At1g09380	Arabidopsis thaliana	1	13.3	3.05e-06	239	47-407 (414)	4-338 (374)
AF-Q1MIM3-F1-model_v4	Riboflavin transporter	Rhizobium leguminosarum bv. viciae 3841	1	11.6	1.11e-05	238	47-401 (414)	15-298 (302)
AF-Q94B65-F1-model_v4	UDP-galactose/UDP-glucose transporter 7	Arabidopsis thaliana	1	12.6	1.68e-05	238	49-413 (414)	12-314 (323)
AF-Q9LQZ0-F1-model_v4	Putative purine permease 15	Arabidopsis thaliana	1	11.1	1.45e-06	238	1-408 (414)	1-387 (387)
AF-P60944-F1-model_v4	Probable glucose uptake protein GlcU	Staphylococcus aureus subsp. aureus N315	1	11.6	4.37e-05	237	50-394 (414)	4-284 (287)
AF-Q755H7-F1-model_v4	UDP-galactose transporter homolog 1	Eremothecium gossypii ATCC 10895	1	11.5	1.26e-05	237	47-408 (414)	6-324 (324)
AF-Q88UI3-F1-model_v4	Putative sugar uptake protein lp_2503	Lactiplantibacillus plantarum WCFS1	1	11.1	6.35e-05	236	51-395 (414)	2-282 (285)
AF-D5RAW5-F1-model_v4	Riboflavin transporter ImpX	Fusobacterium nucleatum subsp. nucleatum ATCC 23726	1	12.8	6.73e-06	236	47-394 (414)	3-296 (299)
AF-Q9SZ96-F1-model_v4	UDP-rhamnose/UDP-galactose transporter 5	Arabidopsis thaliana	1	13.4	1.82e-05	236	30-393 (414)	3-297 (335)
AF-P60945-F1-model_v4	Probable glucose uptake protein GlcU	Staphylococcus aureus subsp. aureus MW2	1	11.6	5.38e-05	234	50-394 (414)	4-284 (287)
AF-F4KD68-F1-model_v4	WAT1-related protein At5g45370	Arabidopsis thaliana	1	10	9.78e-06	233	29-414 (414)	1-380 (381)
AF-Q9FGG3-F1-model_v4	WAT1-related protein At5g64700	Arabidopsis thaliana	1	12.5	1.98e-05	232	51-407 (414)	8-341 (359)
AF-Q6GEH7-F1-model_v4	Probable glucose uptake protein GlcU	Staphylococcus aureus subsp. aureus MRSA252	1	11.6	6.62e-05	231	50-394 (414)	4-284 (287)
AF-Q8CNF2-F1-model_v4	Probable glucose uptake protein GlcU	Staphylococcus epidermidis ATCC 12228	1	10.8	5.61e-05	231	51-394 (414)	5-284 (287)
AF-P60943-F1-model_v4	Probable glucose uptake protein GlcU	Staphylococcus aureus subsp. aureus Mu50	1	11.6	7.2e-05	230	50-394 (414)	4-284 (287)
AF-Q6CR04-F1-model_v4	UDP-galactose transporter homolog 1	Kluyveromyces lactis NRRL Y-1140	1	12.1	3.27e-05	230	40-407 (414)	2-331 (339)
AF-Q5HDV2-F1-model_v4	Probable glucose uptake protein GlcU	Staphylococcus aureus subsp. aureus COL	1	11.6	7.5e-05	229	50-394 (414)	4-284 (287)
AF-Q5HLZ2-F1-model_v4	Probable glucose uptake protein GlcU	Staphylococcus epidermidis RP62A	1	11.1	7.2e-05	229	51-394 (414)	5-284 (287)
AF-O31859-F1-model_v4	Uncharacterized transporter YojE	Bacillus subtilis subsp. subtilis str. 168	1	13.4	1.42e-05	229	44-407 (414)	2-295 (298)
AF-Q56X95-F1-model_v4	WAT1-related protein At3g28130	Arabidopsis thaliana	1	8.6	2.38e-06	229	32-407 (414)	1-342 (355)
AF-P0A1U2-F1-model_v4	Biotin transporter	Salmonella enterica subsp. enterica serovar Typhimurium str. LT2	1	11.1	6.09e-05	228	53-412 (414)	2-298 (299)
AF-Q9FDZ5-F1-model_v4	UDP-rhamnose/UDP-galactose transporter 6	Arabidopsis thaliana	1	13.6	2.07e-05	228	28-393 (414)	1-297 (335)
AF-Q61LC0-F1-model_v4	Adenosine 3'-phospho 5'-phosphosulfate transporter 2	Caenorhabditis briggsae	1	13	6.19e-06	227	47-413 (414)	41-355 (363)
AF-Q5XEZ0-F1-model_v4	WAT1-related protein At1g01070	Arabidopsis thaliana	1	12.9	9.39e-06	227	36-414 (414)	2-360 (365)
AF-Q9ZUI8-F1-model_v4	WAT1-related protein At1g60050	Arabidopsis thaliana	1	12.4	8.28e-06	227	36-414 (414)	2-362 (374)
AF-P61402-F1-model_v4	Probable glucose uptake protein GlcU	Bacillus cereus ATCC 10987	1	13.5	4.56e-05	226	51-395 (414)	2-282 (285)
AF-P0ADP6-F1-model_v4	Biotin transporter	Escherichia coli O157:H7	1	10.8	0.000109	226	53-407 (414)	2-295 (299)
AF-B8B350-F1-model_v4	CMP-sialic acid transporter 1	Oryza sativa Indica Group	1	10.4	2.77e-05	226	51-400 (414)	3-310 (322)
AF-B8B7Q4-F1-model_v4	CMP-sialic acid transporter 2	Oryza sativa Indica Group	1	15.4	6.46e-06	226	10-395 (414)	14-349 (356)
AF-Q9M0B8-F1-model_v4	WAT1-related protein At4g30420	Arabidopsis thaliana	1	11.3	1.68e-05	225	54-413 (414)	2-335 (373)
AF-Q4UDS9-F1-model_v4	Putative chloroquine resistance transporter	Theileria annulata	1	10.4	3.92e-06	225	1-414 (414)	1-404 (430)
AF-P40419-F1-model_v4	Probable glucose uptake protein GlcU	Priestia megaterium	1	13.3	0.000152	224	51-395 (414)	2-283 (286)
AF-F4HZQ7-F1-model_v4	WAT1-related protein At1g21890	Arabidopsis thaliana	1	12.3	7.02e-06	223	38-414 (414)	2-360 (389)
AF-Q0V9U2-F1-model_v4	Solute carrier family 35 member F2	Xenopus tropicalis	1	12.9	1.36e-05	223	2-414 (414)	1-361 (391)
AF-Q9FXH5-F1-model_v4	Purine permease 14	Arabidopsis thaliana	1	11.4	2.48e-06	223	1-408 (414)	1-393 (393)
AF-Q9ZF37-F1-model_v4	Putative sugar uptake protein	Lactobacillus helveticus	1	12	0.000165	222	52-392 (414)	3-279 (280)
AF-Q6G765-F1-model_v4	Probable glucose uptake protein GlcU	Staphylococcus aureus subsp. aureus MSSA476	1	11.4	0.000123	222	50-394 (414)	4-284 (287)
AF-Q9CDF7-F1-model_v4	Putative sugar uptake protein YxfA	Lactococcus lactis subsp. lactis Il1403	1	14.8	3.55e-05	222	51-399 (414)	3-294 (295)
AF-Q6FSF8-F1-model_v4	UDP-galactose transporter homolog 1	[Candida] glabrata CBS 138	1	12.1	1.68e-05	222	29-412 (414)	1-362 (362)
AF-Q6PGC7-F1-model_v4	Solute carrier family 35 member E3	Mus musculus	1	10.7	3.86e-05	221	41-410 (414)	7-311 (313)
AF-Q5PP32-F1-model_v4	WAT1-related protein At3g45870	Arabidopsis thaliana	1	10.9	2.34e-05	221	41-414 (414)	2-355 (385)
AF-Q816V0-F1-model_v4	Probable glucose uptake protein GlcU	Bacillus cereus ATCC 14579	1	13	6.9e-05	220	51-395 (414)	3-283 (286)
AF-Q4PT23-F1-model_v4	WAT1-related protein At1g25270	Arabidopsis thaliana	1	12.3	3.01e-05	219	51-407 (414)	3-332 (355)
AF-P71356-F1-model_v4	Uncharacterized transporter HI_0687	Haemophilus influenzae Rd KW20	1	11.9	4.19e-05	218	53-393 (414)	6-296 (304)
AF-Q03697-F1-model_v4	Putative nucleotide-sugar transporter YMD8	Saccharomyces cerevisiae S288C	1	11.9	2.15e-05	217	49-412 (414)	4-392 (442)
AF-P29086-F1-model_v4	Uncharacterized transporter in sor 3'region	Acidianus ambivalens	1	18.1	4.75e-05	216	170-413 (414)	26-253 (253)
AF-O34428-F1-model_v4	Uncharacterized protein YjlA	Bacillus subtilis subsp. subtilis str. 168	1	10.8	4.75e-05	216	46-414 (414)	2-319 (324)
AF-Q9C508-F1-model_v4	Probable purine permease 18	Arabidopsis thaliana	1	15	3.18e-06	216	1-407 (414)	1-379 (390)
AF-Q84L08-F1-model_v4	GDP-fucose transporter 1	Arabidopsis thaliana	1	13.6	4.37e-05	215	36-414 (414)	2-316 (341)
AF-F4JN00-F1-model_v4	CMP-sialic acid transporter 4	Arabidopsis thaliana	1	13.2	1.42e-05	215	10-399 (414)	1-351 (352)
AF-Q501F8-F1-model_v4	WAT1-related protein At4g08300	Arabidopsis thaliana	1	11.9	1.48e-05	215	55-413 (414)	13-347 (373)
AF-Q500Z4-F1-model_v4	WAT1-related protein At1g11450	Arabidopsis thaliana	1	13.2	9e-06	214	34-413 (414)	3-352 (352)
AF-P60951-F1-model_v4	Putative sugar uptake protein LJ_0170	Lactobacillus johnsonii NCC 533	1	12.3	0.000146	213	53-395 (414)	4-286 (287)
AF-P42194-F1-model_v4	Protein PecM	Dickeya dadantii 3937	1	15.2	8.64e-06	213	80-414 (414)	2-293 (297)
AF-Q654D9-F1-model_v4	CMP-sialic acid transporter 1	Oryza sativa Japonica Group	1	11.1	5.84e-05	213	51-393 (414)	3-303 (322)
AF-Q8LGE9-F1-model_v4	CMP-sialic acid transporter 1	Arabidopsis thaliana	1	12.1	2.25e-05	213	47-412 (414)	6-339 (340)
AF-Q9SUD5-F1-model_v4	WAT1-related protein At4g28040	Arabidopsis thaliana	1	13.4	3.01e-05	213	45-407 (414)	3-322 (359)
AF-Q9VVD9-F1-model_v4	Adenosine 3'-phospho 5'-phosphosulfate transporter 2	Drosophila melanogaster	1	15.7	9.39e-06	212	1-414 (414)	11-392 (396)
AF-Q9H1N7-F1-model_v4	Adenosine 3'-phospho 5'-phosphosulfate transporter 2	Homo sapiens	1	14.3	6.73e-06	211	5-410 (414)	47-392 (401)
AF-Q5R831-F1-model_v4	Adenosine 3'-phospho 5'-phosphosulfate transporter 2	Pongo abelii	1	13.4	7.62e-06	211	1-410 (414)	24-392 (401)
AF-A6WUW2-F1-model_v4	Riboflavin transporter	Brucella anthropi ATCC 49188	1	12.4	4.56e-05	210	58-401 (414)	2-282 (284)
AF-Q1PFJ4-F1-model_v4	Probable purine permease 17	Arabidopsis thaliana	1	14	4.09e-06	210	1-407 (414)	1-387 (398)
AF-Q8NYG6-F1-model_v4	Putative ribose uptake protein RbsU	Staphylococcus aureus subsp. aureus MW2	1	10.2	0.000321	209	51-394 (414)	5-290 (293)
AF-Q5HJA6-F1-model_v4	Putative ribose uptake protein RbsU	Staphylococcus aureus subsp. aureus COL	1	10.2	0.000349	208	51-394 (414)	5-290 (293)
AF-P60949-F1-model_v4	Putative ribose uptake protein RbsU	Lactobacillus johnsonii NCC 533	1	11.8	0.000296	208	49-395 (414)	3-295 (296)
AF-Q8CN16-F1-model_v4	Putative ribose uptake protein RbsU	Staphylococcus epidermidis ATCC 12228	1	11	0.000129	207	47-394 (414)	5-290 (293)
AF-P44579-F1-model_v4	Uncharacterized transporter HI_0223	Haemophilus influenzae Rd KW20	1	7.3	0.000159	207	44-402 (414)	4-297 (300)
AF-Q6BMV3-F1-model_v4	UDP-galactose transporter homolog 1	Debaryomyces hansenii CBS767	1	13.9	2.44e-05	207	46-414 (414)	7-353 (354)
AF-Q8W4R9-F1-model_v4	WAT1-related protein At4g19185	Arabidopsis thaliana	1	11.2	2.15e-05	207	24-414 (414)	1-369 (398)
AF-O68826-F1-model_v4	Probable biotin transporter	Pseudomonas aeruginosa PAO1	1	15.1	0.0001	206	54-401 (414)	3-285 (286)
AF-Q9X4M3-F1-model_v4	Putative ribose uptake protein RbsU	Latilactobacillus sakei subsp. sakei 23K	1	11.2	0.000159	206	49-394 (414)	3-291 (294)
AF-Q9M131-F1-model_v4	WAT1-related protein At4g01430	Arabidopsis thaliana	1	14.4	2.25e-05	206	51-407 (414)	9-336 (365)
AF-Q04835-F1-model_v4	Uncharacterized membrane protein YMR253C	Saccharomyces cerevisiae S288C	1	11.8	1.02e-05	206	1-414 (414)	28-409 (414)
AF-Q5HL85-F1-model_v4	Putative ribose uptake protein RbsU	Staphylococcus epidermidis RP62A	1	11.3	0.000146	205	47-394 (414)	5-290 (293)
AF-Q6GCK2-F1-model_v4	Putative ribose uptake protein RbsU	Staphylococcus aureus subsp. aureus MSSA476	1	10.2	0.00043	205	51-394 (414)	5-290 (293)
AF-O07881-F1-model_v4	Glucose uptake protein GlcU	Staphylococcus xylosus	1	12.7	0.000284	204	51-408 (414)	2-288 (288)
AF-Q6GK41-F1-model_v4	Putative ribose uptake protein RbsU	Staphylococcus aureus subsp. aureus MRSA252	1	10.2	0.000448	204	51-394 (414)	5-290 (293)
AF-P0ADP5-F1-model_v4	Biotin transporter	Escherichia coli K-12	1	11.2	0.00023	204	53-407 (414)	2-295 (299)
AF-Q84L09-F1-model_v4	GDP-mannose transporter GONST2	Arabidopsis thaliana	1	12.7	2.44e-05	204	22-398 (414)	59-374 (375)
AF-Q90X48-F1-model_v4	Probable UDP-sugar transporter protein SLC35A5	Danio rerio	1	12.7	2.07e-05	203	1-414 (414)	5-419 (440)
AF-P14182-F1-model_v4	Protein LicB	Haemophilus influenzae Rd KW20	1	12.2	8.5e-05	202	50-393 (414)	2-284 (292)
AF-Q2AAF6-F1-model_v4	GDP-mannose transporter	Komagataella pastoris	1	15.1	0.000109	202	37-414 (414)	2-327 (329)
AF-A6QPI1-F1-model_v4	Probable UDP-sugar transporter protein SLC35A5	Bos taurus	1	12.3	5.38e-05	202	31-414 (414)	2-419 (425)
AF-Q1JQ66-F1-model_v4	Solute carrier family 35 member E3	Danio rerio	1	9.4	8.15e-05	201	34-410 (414)	4-311 (313)
AF-Q18779-F1-model_v4	UDP-sugar transporter sqv-7	Caenorhabditis elegans	1	11.4	6.62e-05	201	48-414 (414)	9-312 (329)
AF-Q08980-F1-model_v4	Probable transport protein YPL264C	Saccharomyces cerevisiae S288C	1	13.4	5.84e-05	201	51-407 (414)	16-339 (353)
AF-A7E558-F1-model_v4	GDP-mannose transporter	Sclerotinia sclerotiorum 1980 UF-70	1	12.1	3.41e-05	201	1-413 (414)	5-376 (391)
AF-Q7SBC5-F1-model_v4	GDP-mannose transporter	Neurospora crassa OR74A	1	13.7	2.77e-05	200	1-413 (414)	4-377 (392)
AF-Q7Q5D4-F1-model_v4	Adenosine 3'-phospho 5'-phosphosulfate transporter 2	Anopheles gambiae	1	13.3	2.25e-05	199	7-414 (414)	1-369 (377)
AF-Q17CE7-F1-model_v4	Adenosine 3'-phospho 5'-phosphosulfate transporter 2	Aedes aegypti	1	15.3	2.88e-05	199	1-413 (414)	1-375 (382)
AF-A4IHW3-F1-model_v4	Probable UDP-sugar transporter protein SLC35A4	Xenopus tropicalis	1	12.2	3.41e-05	198	15-392 (414)	4-316 (321)
AF-Q01IU9-F1-model_v4	CMP-sialic acid transporter 4	Oryza sativa Indica Group	1	13.7	4.02e-05	198	34-414 (414)	25-365 (405)
AF-P44170-F1-model_v4	Uncharacterized protein HI_1376	Haemophilus influenzae Rd KW20	1	9	0.000105	197	51-400 (414)	3-290 (291)
AF-Q61420-F1-model_v4	CMP-sialic acid transporter	Mus musculus	1	11	3.86e-05	197	51-408 (414)	13-336 (336)
AF-B0DI84-F1-model_v4	GDP-mannose transporter	Laccaria bicolor S238N-H82	1	13.9	4.75e-05	197	44-414 (414)	6-339 (340)
AF-Q9M129-F1-model_v4	WAT1-related protein At4g01450	Arabidopsis thaliana	1	13.8	4.75e-05	197	44-403 (414)	7-328 (361)
AF-Q6DCG9-F1-model_v4	Probable UDP-sugar transporter protein SLC35A5	Xenopus laevis	1	11.7	6.9e-05	197	29-407 (414)	1-381 (413)
AF-A1L4X0-F1-model_v4	Protein CLT2, chloroplastic	Arabidopsis thaliana	1	14.6	1.2e-05	197	1-395 (414)	47-419 (431)
AF-O08520-F1-model_v4	CMP-sialic acid transporter	Cricetulus griseus	1	12.1	5.38e-05	196	51-413 (414)	13-333 (336)
AF-P78382-F1-model_v4	CMP-sialic acid transporter	Homo sapiens	1	10.9	5.16e-05	196	51-408 (414)	13-336 (337)
AF-Q9UTK8-F1-model_v4	GDP-mannose transporter	Schizosaccharomyces pombe 972h-	1	13.5	7.82e-05	196	31-413 (414)	1-327 (345)
AF-A2R9P4-F1-model_v4	GDP-mannose transporter	Aspergillus niger CBS 513.88	1	13.7	6.9e-05	195	1-413 (414)	1-360 (381)
AF-A6RJQ8-F1-model_v4	GDP-mannose transporter	Botrytis cinerea B05.10	1	12.1	4.95e-05	195	1-413 (414)	5-377 (392)
AF-P0A1U3-F1-model_v4	Biotin transporter	Salmonella enterica subsp. enterica serovar Typhi	1	11.5	0.000508	194	53-412 (414)	2-299 (299)
AF-P60946-F1-model_v4	Putative ribose uptake protein RbsU	Staphylococcus aureus subsp. aureus Mu50	1	10.1	0.000508	192	51-394 (414)	5-290 (293)
AF-Q9Y2D2-F1-model_v4	UDP-N-acetylglucosamine transporter	Homo sapiens	1	13.5	7.2e-05	192	48-393 (414)	2-312 (325)
AF-Q6YC49-F1-model_v4	UDP-N-acetylglucosamine transporter	Bos taurus	1	12.9	0.0001	192	44-393 (414)	2-313 (326)
AF-Q9S845-F1-model_v4	GDP-mannose transporter GONST3	Arabidopsis thaliana	1	11	4.02e-05	192	4-411 (414)	1-357 (372)
AF-A1CZJ3-F1-model_v4	GDP-mannose transporter 1	Aspergillus fischeri NRRL 181	1	13.7	6.09e-05	192	1-413 (414)	7-361 (382)
AF-P60947-F1-model_v4	Putative ribose uptake protein RbsU	Staphylococcus aureus subsp. aureus N315	1	10.4	0.000575	191	51-394 (414)	5-290 (293)
AF-A5DIN8-F1-model_v4	GDP-mannose transporter	Meyerozyma guilliermondii ATCC 6260	1	12.6	0.000212	191	34-412 (414)	14-352 (353)
AF-Q05B73-F1-model_v4	Probable UDP-sugar transporter protein SLC35A4	Bos taurus	1	13.5	7.82e-05	190	27-394 (414)	7-321 (324)
AF-Q02334-F1-model_v4	UDP-galactose translocator 1	Caenorhabditis elegans	1	12.5	6.35e-05	189	1-394 (414)	1-351 (355)
AF-Q4WTQ6-F1-model_v4	GDP-mannose transporter	Aspergillus fumigatus Af293	1	13.8	4.75e-05	189	2-413 (414)	1-361 (382)
AF-Q0CA27-F1-model_v4	GDP-mannose transporter	Aspergillus terreus NIH2624	1	12.5	6.35e-05	189	1-413 (414)	1-363 (384)
AF-Q6K8S7-F1-model_v4	CMP-sialic acid transporter 5	Oryza sativa Japonica Group	1	12.9	6.9e-05	189	46-414 (414)	38-389 (405)
AF-Q922Q5-F1-model_v4	Adenosine 3'-phospho 5'-phosphosulfate transporter 2	Mus musculus	1	15.3	6.35e-05	188	3-407 (414)	13-357 (369)
AF-P0CS04-F1-model_v4	GDP-mannose transporter 2	Cryptococcus neoformans var. neoformans JEC21	1	12.1	1.9e-05	188	1-410 (414)	8-414 (420)
AF-Q91ZR7-F1-model_v4	Probable UDP-sugar transporter protein SLC35A4	Rattus norvegicus	1	13.5	9.23e-05	187	22-394 (414)	1-321 (324)
AF-Q6AXR5-F1-model_v4	UDP-N-acetylglucosamine transporter	Rattus norvegicus	1	12.8	0.000203	187	44-393 (414)	2-313 (326)
AF-Q7X7C4-F1-model_v4	CMP-sialic acid transporter 4	Oryza sativa Japonica Group	1	12.8	9.23e-05	187	46-414 (414)	38-365 (405)
AF-A1C9R4-F1-model_v4	GDP-mannose transporter	Aspergillus clavatus NRRL 1	1	10.9	5.38e-05	186	2-413 (414)	1-361 (381)
AF-B0Y384-F1-model_v4	GDP-mannose transporter	Aspergillus fumigatus A1163	1	13.8	6.35e-05	185	1-413 (414)	1-361 (382)
AF-Q6C0U0-F1-model_v4	GDP-mannose transporter	Yarrowia lipolytica CLIB122	1	14.3	0.000172	184	51-410 (414)	9-326 (326)
AF-P0CP32-F1-model_v4	UDP-galactose transporter homolog 1	Cryptococcus neoformans var. neoformans JEC21	1	12.8	5.84e-05	184	44-407 (414)	2-410 (412)
AF-P0CS05-F1-model_v4	GDP-mannose transporter 2	Cryptococcus neoformans var. neoformans B-3501A	1	12.3	3.41e-05	184	1-410 (414)	8-414 (420)
AF-P39314-F1-model_v4	Inner membrane protein YtfF	Escherichia coli K-12	1	13.1	0.000308	183	49-393 (414)	2-305 (321)
AF-Q9D321-F1-model_v4	Probable UDP-sugar transporter protein SLC35A4	Mus musculus	1	12.8	0.000146	183	28-393 (414)	2-320 (324)
AF-Q6FRE5-F1-model_v4	GDP-mannose transporter	[Candida] glabrata CBS 138	1	13	0.000221	183	36-403 (414)	2-323 (324)
AF-Q8R1T4-F1-model_v4	UDP-N-acetylglucosamine transporter	Mus musculus	1	14.4	0.00024	183	48-393 (414)	2-313 (326)
AF-Q1DTI4-F1-model_v4	GDP-mannose transporter	Coccidioides immitis RS	1	12.9	8.15e-05	183	22-413 (414)	2-367 (387)
AF-Q9C5H6-F1-model_v4	CMP-sialic acid transporter 3	Arabidopsis thaliana	1	12.1	0.00025	183	46-407 (414)	37-366 (405)
AF-Q6GQ70-F1-model_v4	Solute carrier family 35 member B1	Xenopus laevis	1	14	0.00038	182	47-398 (414)	8-313 (320)
AF-A3LWX1-F1-model_v4	GDP-mannose transporter	Scheffersomyces stipitis CBS 6054	1	13.5	0.000364	182	39-412 (414)	2-327 (327)
AF-Q2UTL1-F1-model_v4	GDP-mannose transporter	Aspergillus oryzae RIB40	1	13.1	7.2e-05	182	1-413 (414)	5-360 (381)
AF-Q8AXS6-F1-model_v4	Solute carrier family 35 member B1	Xenopus tropicalis	1	12.5	0.00025	180	47-398 (414)	10-316 (323)
AF-A7TR80-F1-model_v4	GDP-mannose transporter 1	Vanderwaltozyma polyspora DSM 70294	1	13.9	0.00043	180	51-411 (414)	19-332 (332)
AF-Q54I86-F1-model_v4	Solute carrier family 35 member B1	Dictyostelium discoideum	1	13.1	0.0001	180	30-414 (414)	35-376 (392)
AF-Q82ZT8-F1-model_v4	Putative ribose uptake protein RbsU	Enterococcus faecalis V583	1	11.6	0.000651	179	46-395 (414)	4-294 (295)
AF-A0JMG9-F1-model_v4	Probable UDP-sugar transporter protein SLC35A4	Danio rerio	1	11.9	0.000123	179	30-393 (414)	7-312 (314)
AF-C8Z830-F1-model_v4	GDP-mannose transporter 1	Saccharomyces cerevisiae EC1118	1	12.3	0.000396	179	24-402 (414)	4-331 (337)
AF-Q10354-F1-model_v4	Uncharacterized transporter C22E12.01	Schizosaccharomyces pombe 972h-	1	13.8	0.000272	179	22-407 (414)	7-362 (374)
AF-Q4P9R2-F1-model_v4	UDP-galactose transporter homolog 1	Ustilago maydis 521	1	14.2	0.000146	179	51-407 (414)	2-380 (391)
AF-Q5AS82-F1-model_v4	GDP-mannose transporter 1	Aspergillus nidulans FGSC A4	1	13.6	6.62e-05	178	1-414 (414)	2-364 (379)
AF-Q8GY97-F1-model_v4	CMP-sialic acid transporter 2	Arabidopsis thaliana	1	13.5	0.000284	178	34-407 (414)	28-368 (406)
AF-Q6J163-F1-model_v4	Auxin-induced protein 5NG4	Pinus taeda	1	13.1	8.5e-05	178	35-414 (414)	2-362 (410)
AF-Q9BS91-F1-model_v4	Probable UDP-sugar transporter protein SLC35A5	Homo sapiens	1	12.1	0.000335	178	26-414 (414)	1-419 (424)
AF-Q6V7K3-F1-model_v4	Solute carrier family 35 member B1	Rattus norvegicus	1	13.4	0.000396	176	53-414 (414)	16-322 (322)
AF-B3LHR7-F1-model_v4	GDP-mannose transporter 1	Saccharomyces cerevisiae RM11-1a	1	12.1	0.000575	176	26-412 (414)	5-337 (337)
AF-Q5A477-F1-model_v4	GDP-mannose transporter	Candida albicans SC5314	1	13.7	0.000146	176	23-412 (414)	38-370 (371)
AF-Q753T9-F1-model_v4	GDP-mannose transporter	Eremothecium gossypii ATCC 10895	1	13.9	0.000396	174	51-402 (414)	18-325 (329)
AF-Q29Q28-F1-model_v4	UDP-galactose/UDP-glucose transporter 2	Arabidopsis thaliana	1	13.9	0.000487	174	52-414 (414)	22-317 (345)
AF-P40107-F1-model_v4	GDP-mannose transporter 1	Saccharomyces cerevisiae S288C	1	12.3	0.000599	173	26-412 (414)	5-337 (337)
AF-A6ZTW6-F1-model_v4	GDP-mannose transporter 1	Saccharomyces cerevisiae YJM789	1	12.7	0.000467	173	26-412 (414)	5-337 (337)
AF-P97858-F1-model_v4	Solute carrier family 35 member B1	Mus musculus	1	13.3	0.000529	172	53-414 (414)	16-322 (322)
AF-P78383-F1-model_v4	Solute carrier family 35 member B1	Homo sapiens	1	13.5	0.00038	172	53-412 (414)	16-321 (322)
AF-Q5N855-F1-model_v4	CMP-sialic acid transporter 3	Oryza sativa Japonica Group	1	10.9	0.000871	172	47-401 (414)	38-354 (402)
AF-P0CP33-F1-model_v4	UDP-galactose transporter homolog 1	Cryptococcus neoformans var. neoformans B-3501A	1	12.3	0.000159	171	44-407 (414)	2-410 (412)
AF-Q4PFQ1-F1-model_v4	GDP-mannose transporter	Ustilago maydis 521	1	12.4	0.000109	171	3-414 (414)	15-455 (471)
AF-P0CS02-F1-model_v4	GDP-mannose transporter 1	Cryptococcus neoformans var. neoformans JEC21	1	13.5	0.000187	170	1-407 (414)	1-392 (397)
AF-Q5R4D7-F1-model_v4	Probable UDP-sugar transporter protein SLC35A5	Pongo abelii	1	12.1	0.000396	170	28-414 (414)	2-419 (424)
AF-Q8MII5-F1-model_v4	Solute carrier family 35 member B1	Bos taurus	1	15.1	0.000625	169	53-414 (414)	16-322 (322)
AF-Q8MXJ9-F1-model_v4	Adenosine 3'-phospho 5'-phosphosulfate transporter 1	Caenorhabditis elegans	1	11.7	0.000212	169	31-411 (414)	94-424 (425)
AF-Q88RZ3-F1-model_v4	Putative ribose uptake protein RbsU	Lactiplantibacillus plantarum WCFS1	1	9.9	0.00163	168	51-394 (414)	5-292 (294)
AF-Q921R7-F1-model_v4	Probable UDP-sugar transporter protein SLC35A5	Mus musculus	1	12.7	0.000552	167	33-414 (414)	8-435 (437)
AF-A1DA52-F1-model_v4	GDP-mannose transporter 2	Aspergillus fischeri NRRL 181	1	11.4	0.000284	166	24-400 (414)	1-355 (357)
AF-B8A7Q8-F1-model_v4	CMP-sialic acid transporter 3	Oryza sativa Indica Group	1	10.9	0.00163	166	47-401 (414)	38-354 (402)
AF-Q7Z0V9-F1-model_v4	Putative chloroquine resistance transporter	Plasmodium chabaudi	1	10.7	9.62e-05	166	1-407 (414)	4-405 (424)
AF-Q96G79-F1-model_v4	Probable UDP-sugar transporter protein SLC35A4	Homo sapiens	1	13.2	0.000487	165	17-393 (414)	3-320 (324)
AF-Q7Z5S9-F1-model_v4	Transmembrane protein 144	Homo sapiens	1	12.5	0.00112	165	42-395 (414)	2-342 (345)
AF-P0CS03-F1-model_v4	GDP-mannose transporter 1	Cryptococcus neoformans var. neoformans B-3501A	1	13.1	0.000261	165	1-407 (414)	1-392 (397)
AF-C7GUZ7-F1-model_v4	GDP-mannose transporter 1	Saccharomyces cerevisiae JAY291	1	12.6	0.000769	164	26-402 (414)	5-331 (337)
AF-C8Z742-F1-model_v4	Probable GDP-mannose transporter 2	Saccharomyces cerevisiae EC1118	1	12.6	0.000708	164	36-407 (414)	2-335 (341)
AF-A4RM13-F1-model_v4	GDP-mannose transporter	Pyricularia oryzae 70-15	1	12.5	0.00038	164	22-412 (414)	31-378 (394)
AF-Q2HA88-F1-model_v4	GDP-mannose transporter	Chaetomium globosum CBS 148.51	1	13.6	0.000203	164	1-412 (414)	21-379 (394)
AF-Q9GSD8-F1-model_v4	Putative chloroquine resistance transporter	Plasmodium berghei	1	9.9	0.000159	164	25-411 (414)	32-410 (425)
AF-Q66HX0-F1-model_v4	Solute carrier family 35 member B1	Danio rerio	1	15.3	0.000625	163	49-414 (414)	18-329 (329)
AF-A8PTV6-F1-model_v4	GDP-mannose transporter	Malassezia globosa CBS 7966	1	12.8	0.000159	161	1-414 (414)	1-458 (484)
AF-Q6CYD0-F1-model_v4	GDP-mannose transporter	Kluyveromyces lactis NRRL Y-1140	1	13.9	0.000836	160	58-411 (414)	21-325 (330)
AF-A8N9T6-F1-model_v4	GDP-mannose transporter	Coprinopsis cinerea okayama7#130	1	14.6	0.000284	159	74-413 (414)	30-355 (360)
AF-Q7REK3-F1-model_v4	Putative chloroquine resistance transporter	Plasmodium yoelii yoelii	1	10.1	0.00014	159	25-411 (414)	32-409 (424)
AF-Q0UG89-F1-model_v4	GDP-mannose transporter	Parastagonospora nodorum SN15	1	12.3	0.000738	158	3-413 (414)	11-361 (381)
AF-Q9N623-F1-model_v4	Chloroquine resistance transporter	Plasmodium falciparum	1	9.5	0.000296	158	26-407 (414)	33-405 (424)
AF-Q9VDD7-F1-model_v4	Solute carrier family 35 member B1 homolog	Drosophila melanogaster	1	12.8	0.00169	157	48-414 (414)	6-322 (338)
AF-Q6NM25-F1-model_v4	UDP-galactose/UDP-glucose transporter 5	Arabidopsis thaliana	1	10.8	0.00156	157	29-414 (414)	1-334 (347)
AF-Q5AQY2-F1-model_v4	GDP-mannose transporter 2	Aspergillus nidulans FGSC A4	1	11.5	0.000575	157	25-399 (414)	1-355 (357)
AF-A7TES5-F1-model_v4	GDP-mannose transporter 2	Vanderwaltozyma polyspora DSM 70294	1	13.9	0.000836	156	31-408 (414)	2-332 (332)
AF-Q6C4X5-F1-model_v4	UDP-galactose transporter homolog 1	Yarrowia lipolytica CLIB122	1	12	0.000738	156	30-400 (414)	29-364 (365)
AF-Q8IBZ9-F1-model_v4	Putative chloroquine resistance transporter	Plasmodium falciparum 3D7	1	9.7	0.000396	156	26-407 (414)	33-405 (424)
AF-Q9VEI3-F1-model_v4	Adenosine 3'-phospho 5'-phosphosulfate transporter 1	Drosophila melanogaster	1	9.6	0.000412	156	15-414 (414)	120-464 (465)
AF-Q8LES0-F1-model_v4	UDP-N-acetylglucosamine transporter ROCK1	Arabidopsis thaliana	1	11.8	0.000187	155	64-394 (414)	19-313 (325)
AF-Q9LDX3-F1-model_v4	UDP-galactose/UDP-glucose transporter 4	Arabidopsis thaliana	1	13.6	0.00177	155	54-392 (414)	26-310 (349)
AF-Q9GSD7-F1-model_v4	Putative chloroquine resistance transporter	Plasmodium knowlesi	1	10.3	0.000212	151	25-407 (414)	32-404 (424)
AF-Q6NMB6-F1-model_v4	UDP-galactose/UDP-glucose transporter 5B	Arabidopsis thaliana	1	11.9	0.00257	149	29-414 (414)	1-342 (344)
AF-Q5R9A1-F1-model_v4	Adenosine 3'-phospho 5'-phosphosulfate transporter 1	Pongo abelii	1	12	0.00121	146	48-414 (414)	108-430 (432)
AF-Q8VEH0-F1-model_v4	Transmembrane protein 144	Mus musculus	1	11.4	0.00521	139	42-395 (414)	2-345 (348)
AF-Q9VMU8-F1-model_v4	UDP-galactose transporter senju	Drosophila melanogaster	1	11.6	0.00156	139	50-414 (414)	13-377 (388)
AF-A6QQU6-F1-model_v4	Transmembrane protein 144	Bos taurus	1	11.5	0.00668	129	46-395 (414)	2-345 (348)
AF-Q10000-F1-model_v4	Transmembrane protein 144 homolog	Caenorhabditis elegans	1	8.2	0.0153	122	48-395 (414)	3-343 (345)
AF-Q8TB61-F1-model_v4	Adenosine 3'-phospho 5'-phosphosulfate transporter 1	Homo sapiens	1	11.4	0.0059	117	20-414 (414)	82-430 (432)
AF-Q91ZN5-F1-model_v4	Adenosine 3'-phospho 5'-phosphosulfate transporter 1	Mus musculus	1	10.4	0.0135	115	44-414 (414)	105-429 (431)
AF-O86230-F1-model_v4	Uncharacterized transporter HI_0976.1	Haemophilus influenzae Rd KW20	1	13.3	0.171	93	232-403 (414)	2-169 (170)
AF-Q4IM48-F1-model_v4	Probable transporter MCH1	Fusarium graminearum PH-1	0.41	8.8	0.94	48	1-359 (414)	3-555 (572)
AF-P9WG89-F1-model_v4	Multidrug resistance protein B homolog	Mycobacterium tuberculosis H37Rv	0.35	13.6	1.16	46	142-409 (414)	1-287 (540)
AF-P9WG88-F1-model_v4	Multidrug resistance protein B homolog	Mycobacterium tuberculosis CDC1551	0.3	14.1	1.42	44	140-409 (414)	4-287 (540)

## Sheet: AFDB50
Target	Description	Scientific Name	Prob.	Seq. Id.	E-Value	Score	Query Pos.	Target Pos.
AF-A0A6P7LDH2-F1-model_v4	solute carrier family 35 member F5 isoform X2	Betta splendens	1	31.3	1.07e-18	825	23-407 (414)	6-449 (457)
AF-A0A3P8ZRE9-F1-model_v4	Solute carrier family 35 member F5	Esox lucius	1	28.9	3.29e-18	823	30-414 (414)	12-457 (484)
AF-A0A315VSL0-F1-model_v4	Uncharacterized protein	Gambusia affinis	1	28.6	1.19e-17	790	30-414 (414)	47-503 (508)
AF-A0A6B2LBJ4-F1-model_v4	TPT domain-containing protein	Arcella intermedia	1	32.8	2.25e-15	744	54-395 (414)	2-303 (303)
AF-T0PSV4-F1-model_v4	Uncharacterized protein	Saprolegnia diclina VS20	1	25.5	2.02e-16	742	1-414 (414)	2-373 (374)
AF-A0A0X8HUD7-F1-model_v4	HFL222Cp	Eremothecium sinecaudum	1	24.2	3.13e-15	698	40-413 (414)	2-392 (396)
AF-G7E7K8-F1-model_v4	Uncharacterized protein	Mixia osmundae IAM 14324	1	24.2	3.55e-15	684	1-412 (414)	1-416 (416)
AF-A0A194S3N6-F1-model_v4	Uncharacterized protein	Rhodotorula graminis WP1	1	26.7	1.83e-15	681	50-407 (414)	2-350 (403)
AF-A0A2P5D4X5-F1-model_v4	EamA domain containing protein	Parasponia andersonii	1	24.8	2.84e-14	585	34-404 (414)	24-428 (429)
AF-A0A6J0BK04-F1-model_v4	putative thiamine transporter SLC35F3 isoform X1	Neodiprion lecontei	1	20	1.27e-13	574	1-414 (414)	51-463 (564)
AF-A0A7R9G6I8-F1-model_v4	Hypothetical protein	Timema shepardi	1	25.9	4.13e-14	565	26-414 (414)	32-490 (513)
AF-A0A364L264-F1-model_v4	EamA domain-containing protein	Talaromyces amestolkiae	1	24.9	2.79e-13	537	31-407 (414)	1-444 (457)
AF-A0A182N9V8-F1-model_v4	Uncharacterized protein	Anopheles dirus	1	16	1.47e-12	537	1-414 (414)	84-536 (667)
AF-A0A0D1DPY9-F1-model_v4	Uncharacterized protein	Ustilago maydis 521	1	19.3	1.47e-12	515	34-414 (414)	15-590 (618)
AF-A0A087SPJ2-F1-model_v4	Putative vacuolar membrane protein	Auxenochlorella protothecoides	1	23.9	3.11e-12	500	31-414 (414)	1-399 (401)
AF-A0A668UNY8-F1-model_v4	Solute carrier family 35 member F3b	Oreochromis aureus	1	16	2.29e-11	487	5-414 (414)	84-465 (488)
AF-A0A135UWR7-F1-model_v4	Uncharacterized protein	Colletotrichum nymphaeae SA-01	1	15.1	3.19e-11	483	1-414 (414)	111-534 (534)
AF-A0A087SBX9-F1-model_v4	Solute carrier family 35 member G1	Auxenochlorella protothecoides	1	12.3	1.87e-09	456	33-414 (414)	12-349 (352)
AF-A0A6B2L9V4-F1-model_v4	Uncharacterized protein	Arcella intermedia	1	17.5	5.08e-09	448	47-395 (414)	4-297 (328)
AF-A0A839AEB4-F1-model_v4	DMT family transporter	Stappia albiluteola	1	14.9	1.32e-08	440	49-414 (414)	3-300 (300)
AF-W0FSI2-F1-model_v4	DMT superfamily drug/metabolite transporter	uncultured bacterium Contigcl_1738	1	15.2	1.63e-08	437	31-411 (414)	1-310 (311)
AF-A0A315VU13-F1-model_v4	Uncharacterized protein	Gambusia affinis	1	16.4	1.11e-10	436	16-414 (414)	35-408 (437)
AF-A0A2N0VH61-F1-model_v4	EamA/RhaT family transporter	Rhodohalobacter barkolensis	1	14.8	2.57e-08	435	43-399 (414)	2-298 (299)
AF-A0A1I5ZE99-F1-model_v4	Permease of the drug/metabolite transporter (DMT) superfamily	Roseivivax halotolerans	1	13.5	1.32e-08	434	51-407 (414)	11-305 (307)
AF-A0A1M6MQE6-F1-model_v4	EamA domain-containing membrane protein RarD	Dethiosulfatibacter aminovorans DSM 17477	1	13.2	1.08e-08	433	47-408 (414)	2-304 (304)
AF-A0A536PRW3-F1-model_v4	EamA/RhaT family transporter	Chloroflexi bacterium	1	11.8	1.77e-08	430	1-412 (414)	16-350 (350)
AF-A0A1U9JPW9-F1-model_v4	Uncharacterized protein	Aquaspirillum sp. LM1	1	12.4	7.9e-08	426	44-394 (414)	3-286 (299)
AF-A0A7R7IDZ5-F1-model_v4	Transporter	Lachnospiraceae bacterium TB5	1	14.7	3.74e-08	424	44-407 (414)	3-297 (304)
AF-A0A3B9B866-F1-model_v4	EamA/RhaT family transporter	Lachnospiraceae bacterium	1	14.4	2.41e-09	424	1-408 (414)	1-332 (332)
AF-A0A813EV94-F1-model_v4	Hypothetical protein	Polarella glacialis	1	15.7	1.87e-09	424	1-414 (414)	1-376 (377)
AF-A0A364KRF2-F1-model_v4	EamA domain-containing protein	Talaromyces amestolkiae	1	16.7	1.99e-10	424	1-414 (414)	3-434 (435)
AF-A0A7V7QNI6-F1-model_v4	EamA family transporter	Candidatus Galacturonibacter soehngenii	1	16	2.68e-08	422	44-414 (414)	3-300 (302)
AF-A0A369H232-F1-model_v4	Uncharacterized protein	Ophiocordyceps camponoti-saundersi (nom. inval.)	1	16.1	3.27e-10	422	1-407 (414)	47-473 (493)
AF-A0A318CG92-F1-model_v4	DMT(Drug/metabolite transporter) superfamily permease	Pokkaliibacter plantistimulans	1	12.7	6.98e-08	420	47-399 (414)	3-293 (294)
AF-A0A1W0WDK2-F1-model_v4	Uncharacterized protein	Hypsibius dujardini	1	13.7	1.29e-09	420	1-407 (414)	1-394 (528)
AF-A0A1S9DQA1-F1-model_v4	Major facilitator superfamily MFS_1	Aspergillus oryzae	1	16	3.01e-10	420	1-407 (414)	630-1029 (1040)
AF-D1BTH3-F1-model_v4	Uncharacterized protein	Xylanimonas cellulosilytica DSM 15894	1	16	8.95e-08	419	50-407 (414)	4-294 (297)
AF-A0A1I6WM39-F1-model_v4	Permease of the drug/metabolite transporter (DMT) superfamily	Paenibacillus sp. BC26	1	17.1	1.92e-08	417	46-395 (414)	4-291 (302)
AF-A0A1Y2WN15-F1-model_v4	EamA domain-containing protein	Daldinia sp. EC12	1	14.9	2.77e-10	417	1-407 (414)	39-453 (458)
AF-A0A2D9YSJ1-F1-model_v4	ABC transporter permease	Maritimibacter sp.	1	16.9	5e-08	416	50-404 (414)	2-281 (282)
AF-A0A7J4IBV5-F1-model_v4	DMT family transporter	Candidatus Woesearchaeota archaeon	1	12.9	5.67e-08	414	46-411 (414)	2-300 (301)
AF-A0A3N5WHQ5-F1-model_v4	DMT family transporter	Chloroflexi bacterium	1	12.6	8.24e-08	413	47-394 (414)	4-289 (293)
AF-A0A1W0WDP1-F1-model_v4	Uncharacterized protein	Hypsibius dujardini	1	17.7	1.17e-08	409	45-407 (414)	53-393 (464)
AF-D7BBC4-F1-model_v4	Uncharacterized protein	Meiothermus silvanus DSM 9946	1	11.1	2.75e-07	408	46-393 (414)	3-283 (286)
AF-A0A531DEL4-F1-model_v4	DMT family transporter	Mesorhizobium sp.	1	16.2	8.37e-09	404	29-413 (414)	3-308 (332)
AF-A0A3C1FDK4-F1-model_v4	Uncharacterized protein	Propionibacteriaceae bacterium	1	13.8	8.95e-08	402	47-407 (414)	5-298 (300)
AF-A0A839WGB4-F1-model_v4	Drug/metabolite transporter (DMT)-like permease	Atlantibacter sp. RC6	1	16.8	6.42e-08	401	51-393 (414)	2-289 (293)
AF-A0A1W0WCP9-F1-model_v4	Uncharacterized protein	Hypsibius dujardini	1	13.8	3.65e-09	400	1-414 (414)	1-389 (455)
AF-A0A7Y0JF33-F1-model_v4	DMT family transporter	Streptomyces sp. GMY02	1	11.8	6.16e-08	399	1-397 (414)	5-323 (333)
AF-A0A543DXX2-F1-model_v4	Putative blue pigment (Indigoidine) exporter	Pseudonocardia kunmingensis	1	12	2.23e-07	397	23-393 (414)	1-293 (299)
AF-A0A285C7Z7-F1-model_v4	EamA domain-containing membrane protein RarD	Streptomyces sp. TLI_55	1	15.1	1.89e-07	395	43-396 (414)	7-294 (324)
AF-A0A2M6YVZ4-F1-model_v4	Uncharacterized protein	Ignavibacteriales bacterium CG07_land_8_20_14_0_80_59_12	1	13.3	4.6e-08	394	1-414 (414)	12-354 (354)
AF-A0A7X0IX52-F1-model_v4	Drug/metabolite transporter (DMT)-like permease	Rhizobium lusitanum	1	15.6	1.15e-07	393	47-410 (414)	7-296 (306)
AF-H1S9Q5-F1-model_v4	Uncharacterized protein	Cupriavidus basilensis OR16	1	13.6	8.95e-08	392	44-405 (414)	3-299 (300)
AF-A0A4V1YUC7-F1-model_v4	DMT family transporter	Bacteroides eggerthii	1	13.7	6.98e-08	391	45-411 (414)	2-302 (304)
AF-A0A6N7ZST3-F1-model_v4	DMT family transporter	Roseibium sp. RKSG952	1	14.8	1.15e-07	390	51-397 (414)	2-288 (305)
AF-A0A0E0AYB2-F1-model_v4	Uncharacterized protein	Oryza glumipatula	1	13.8	1.17e-08	389	1-407 (414)	88-441 (462)
AF-A0A4R6W024-F1-model_v4	Drug/metabolite transporter (DMT)-like permease	Maritalea mobilis	1	13.3	1.41e-07	388	47-401 (414)	3-292 (296)
AF-A0A0L7T6B2-F1-model_v4	Uncharacterized protein	Erwinia iniecta	1	11.4	2.53e-07	388	29-403 (414)	1-295 (297)
AF-A0A2S5KKF5-F1-model_v4	EamA family transporter	Proteobacteria bacterium 228	1	12.4	2.64e-07	388	43-400 (414)	3-289 (305)
AF-A0A4D7H8P4-F1-model_v4	DMT family transporter	Haloprofundus sp. MHR1	1	15.7	2.64e-07	388	49-414 (414)	4-308 (308)
AF-A0A101V9I6-F1-model_v4	Uncharacterized protein	Desulfitibacter sp. BRH_c19	1	16.3	1.47e-07	387	49-393 (414)	3-285 (305)
AF-A0A101VCC0-F1-model_v4	Uncharacterized protein	Desulfitibacter sp. BRH_c19	1	13.4	2.75e-07	387	47-407 (414)	3-297 (305)
AF-A0A2H6BBS9-F1-model_v4	Uncharacterized protein	Methylopila sp. Yamaguchi	1	13.7	6.16e-08	387	6-408 (414)	12-324 (324)
AF-A0A1D1ZWY4-F1-model_v4	TPT domain-containing protein	Auxenochlorella protothecoides	1	12.6	1.38e-08	387	1-414 (414)	52-409 (409)
AF-A0A1W0WU99-F1-model_v4	EamA domain-containing protein	Hypsibius dujardini	1	16	8.17e-10	386	1-407 (414)	1-424 (452)
AF-A0A7Z0L8P3-F1-model_v4	DMT family transporter	Gemella palaticanis	1	13.3	2.53e-07	385	48-396 (414)	6-284 (285)
AF-K0KF35-F1-model_v4	Solute carrier family 35 member F5	Wickerhamomyces ciferrii NRRL Y-1031	1	27.8	1.24e-09	385	93-403 (414)	14-312 (313)
AF-A0A3B0VDY2-F1-model_v4	Permease of the drug/metabolite transporter (DMT) superfamily	hydrothermal vent metagenome	1	15.4	1.7e-08	385	1-406 (414)	5-348 (349)
AF-A0A183IGX9-F1-model_v4	TPT domain-containing protein	Soboliphyme baturini	1	15.9	1.63e-08	385	48-407 (414)	8-315 (367)
AF-A0A3E0TZE4-F1-model_v4	DMT family transporter	Thalassotalea euphylliae	1	14.6	3.53e-07	384	51-395 (414)	5-283 (289)
AF-S7U2Y1-F1-model_v4	Uncharacterized protein	Desulfovibrio sp. X2	1	15.5	4.8e-08	383	1-394 (414)	2-343 (347)
AF-A0A1R4A686-F1-model_v4	DME family DMT superfamily transporter	Cuniculiplasma divulgatum	1	14	1.74e-07	382	51-394 (414)	8-285 (290)
AF-A0A5J6MSF3-F1-model_v4	Multidrug transporter	Hypericibacter adhaerens	1	16.5	5.44e-08	382	46-408 (414)	9-295 (295)
AF-A0A3N4RAA5-F1-model_v4	O-acetylserine/cysteine efflux transporter	Acinetobacter sp. BIGb0102	1	14.1	7.15e-07	381	51-413 (414)	5-291 (294)
AF-V6ARX3-F1-model_v4	Uncharacterized protein	Candidatus Nitrosotenuis uzonensis	1	13.4	4.72e-07	380	48-393 (414)	9-289 (293)
AF-A0A532UMR6-F1-model_v4	Uncharacterized protein	Planctomycetes bacterium B3_Pla	1	16.1	4.53e-07	380	47-403 (414)	11-305 (306)
AF-C1AAE9-F1-model_v4	Hypothetical membrane protein	Gemmatimonas aurantiaca T-27	1	15.3	3.9e-08	380	34-394 (414)	9-315 (325)
AF-A0A6B2LAE2-F1-model_v4	TPT domain-containing protein	Arcella intermedia	1	15	3.59e-08	379	51-404 (414)	2-306 (307)
AF-A0A3M1UW52-F1-model_v4	Uncharacterized protein	Euryarchaeota archaeon	1	13.6	5.81e-07	378	53-396 (414)	6-287 (297)
AF-A0A292E8H7-F1-model_v4	EamA family transporter	Rhizobium sp. ACO-34A	1	13	3.84e-07	378	51-406 (414)	15-309 (310)
AF-A0A3N5N4H9-F1-model_v4	DMT family transporter	Betaproteobacteria bacterium	1	13.6	1.01e-07	378	31-404 (414)	1-307 (311)
AF-A0A3C1FCN7-F1-model_v4	Uncharacterized protein	Propionibacteriaceae bacterium	1	14	2.99e-07	377	47-414 (414)	3-294 (298)
AF-A0A7Z0M5F3-F1-model_v4	EamA family transporter	Streptococcus danieliae	1	14.6	2.99e-07	377	44-399 (414)	4-300 (301)
AF-A0A1A9F475-F1-model_v4	Uncharacterized protein	Marinobacterium aestuarii	1	12.5	5.81e-07	376	45-400 (414)	3-284 (290)
AF-A0A6N8A6I3-F1-model_v4	DMT family transporter	Roseibium sp. RKSG952	1	13.9	1.67e-07	376	48-413 (414)	10-299 (302)
AF-A0A534IC39-F1-model_v4	DMT family transporter	Gammaproteobacteria bacterium	1	12.5	3.12e-07	375	46-408 (414)	3-296 (296)
AF-A0A1K1SZV4-F1-model_v4	Permease of the drug/metabolite transporter (DMT) superfamily	Amycolatopsis australiensis	1	15.3	3.84e-07	375	48-392 (414)	11-285 (300)
AF-A0A381Q889-F1-model_v4	Uncharacterized protein	marine metagenome	1	13.4	2.87e-07	375	51-402 (414)	18-309 (310)
AF-A0A0A2E9T9-F1-model_v4	Putative DMT superfamily transporter inner membrane protein	Porphyromonas macacae	1	14.4	1.7e-08	375	47-407 (414)	2-300 (311)
AF-C4LF80-F1-model_v4	Uncharacterized protein	Tolumonas auensis DSM 9187	1	12.9	2.43e-07	375	51-395 (414)	20-301 (311)
AF-A0A4Q3VP97-F1-model_v4	DMT family transporter	Chitinophagaceae bacterium	1	17.2	1.36e-07	373	51-394 (414)	12-295 (306)
AF-A0A2G6DJU1-F1-model_v4	EamA family transporter	Proteobacteria bacterium	1	13.2	5.22e-08	373	10-394 (414)	23-350 (354)
AF-A0A839UXH2-F1-model_v4	Drug/metabolite transporter (DMT)-like permease	Simiduia aestuariiviva	1	14.8	6.98e-08	372	46-395 (414)	6-301 (305)
AF-A0A379DJ72-F1-model_v4	Putative DMT superfamily transporter inner membrane protein	Porphyromonas macacae	1	15.5	3.9e-08	372	44-407 (414)	3-307 (311)
AF-A0A2S5GKA9-F1-model_v4	EamA/RhaT family transporter	Achromobacter spanius	1	16.6	4.17e-07	371	53-401 (414)	3-293 (294)
AF-A0A1I4LHX6-F1-model_v4	EamA-like transporter family protein	Marinobacter zhejiangensis	1	13.6	6.58e-07	371	53-406 (414)	5-295 (296)
AF-A0A0S8KLE2-F1-model_v4	Uncharacterized protein	Anaerolineae bacterium SM23_84	1	16.2	1.97e-07	371	53-414 (414)	3-304 (306)
AF-A0A226X521-F1-model_v4	Permease of the drug/metabolite transporter (DMT) superfamily	Caballeronia sordidicola	1	12.3	1.41e-07	371	1-403 (414)	6-342 (343)
AF-A0A231NQT4-F1-model_v4	Uncharacterized protein	Acetobacterium sp. MES1	1	14.2	3.53e-07	370	51-414 (414)	4-293 (294)
AF-A0A3M1K516-F1-model_v4	DMT family transporter	Candidatus Dadabacteria bacterium	1	14.6	1.89e-07	370	46-393 (414)	15-289 (294)
AF-A0A2V2SRY4-F1-model_v4	Uncharacterized protein	Candidatus Rokubacteria bacterium	1	13.3	6.32e-07	370	50-398 (414)	19-303 (304)
AF-A0A411DWN2-F1-model_v4	Int-tm_transporter_17	Parasacculina yatsui	1	14.3	9.73e-08	370	44-414 (414)	11-331 (336)
AF-A0A087SR37-F1-model_v4	Phosphoenolpyruvate/phosphate translocator 2, chloroplastic	Auxenochlorella protothecoides	1	13.2	9.49e-09	370	1-411 (414)	42-383 (384)
AF-A0A087SPQ9-F1-model_v4	Triose phosphate/phosphate translocator TPT, chloroplastic	Auxenochlorella protothecoides	1	11.9	1.15e-07	369	31-414 (414)	1-316 (316)
AF-A0A3A8AYV4-F1-model_v4	DMT family transporter	Roseovarius spongiae	1	13	3.53e-07	368	51-414 (414)	8-310 (320)
AF-A0A1H7ZYV8-F1-model_v4	Permease of the drug/metabolite transporter (DMT) superfamily	Stigmatella aurantiaca	1	10.7	3.39e-07	367	4-408 (414)	1-321 (324)
AF-A0A0R2KS50-F1-model_v4	DMT family permease	Ligilactobacillus ceti DSM 22408	1	11.6	3.12e-07	367	48-407 (414)	4-303 (326)
AF-A0A1W0WK80-F1-model_v4	Uncharacterized protein	Hypsibius dujardini	1	16.2	1.08e-08	367	23-414 (414)	1-394 (429)
AF-A0A6H5K1Z3-F1-model_v4	EamA domain-containing protein	Ectocarpus sp. CCAP 1310/34	1	25.6	2.01e-08	366	135-393 (414)	80-340 (384)
AF-A0A3L8P7T9-F1-model_v4	DMT family transporter	Marmoricola mangrovicus	1	13.3	4.72e-07	365	51-401 (414)	8-291 (291)
AF-A0A2M7DWP9-F1-model_v4	Uncharacterized protein	Bacteroidetes bacterium CG02_land_8_20_14_3_00_31_25	1	14.3	6.58e-07	365	44-401 (414)	3-298 (299)
AF-A0A849ZMN4-F1-model_v4	DMT family transporter	Candidatus Sumerlaeia bacterium	1	13.6	1.47e-07	365	50-414 (414)	9-307 (316)
AF-A0A7T1KKC0-F1-model_v4	DMT family transporter	Thalassospira sp. A40-3	1	15.8	1.13e-06	364	47-408 (414)	4-296 (296)
AF-A0A0W4ZSV4-F1-model_v4	Uncharacterized protein	Pneumocystis carinii B80	1	13.9	9.33e-08	364	1-414 (414)	1-358 (369)
AF-A0A357TK53-F1-model_v4	EamA family transporter	Oscillospiraceae bacterium	1	13.6	6.06e-07	363	47-406 (414)	3-303 (304)
AF-A0A4Q7RF53-F1-model_v4	Threonine/homoserine efflux transporter RhtA	Microbacterium sp. BK664	1	13.3	8.11e-07	363	50-414 (414)	10-300 (307)
AF-A0A5J6MVX4-F1-model_v4	Membrane protein	Hypericibacter adhaerens	1	13.3	7.15e-07	363	47-402 (414)	11-312 (313)
AF-A0A2C6DIE0-F1-model_v4	EamA family transporter	Budvicia aquatica	1	14	5.35e-07	363	42-414 (414)	2-313 (320)
AF-A0A124IGX9-F1-model_v4	Uncharacterized protein	Desulfitibacter sp. BRH_c19	1	16.2	4.92e-07	362	51-402 (414)	9-293 (295)
AF-A0A5J6MWK8-F1-model_v4	Uncharacterized protein	Hypericibacter adhaerens	1	15.1	7.77e-07	362	49-411 (414)	7-296 (297)
AF-A0A2E9XMK4-F1-model_v4	EamA family transporter	Porticoccaceae bacterium	1	13.4	1.89e-07	362	22-405 (414)	1-334 (338)
AF-A0A4D8XR02-F1-model_v4	Solute carrier family 35, member E1	Salvia splendens	1	13.9	1.56e-08	362	1-407 (414)	46-434 (530)
AF-A0A243DTT1-F1-model_v4	EamA family transporter	Bacillus thuringiensis serovar darmstadiensis	1	13.1	3.84e-07	361	46-393 (414)	2-289 (294)
AF-A0A1M6M3S3-F1-model_v4	Permease of the drug/metabolite transporter (DMT) superfamily	Dethiosulfatibacter aminovorans DSM 17477	1	12.1	5.81e-07	361	47-412 (414)	4-304 (316)
AF-A0A2E5FH02-F1-model_v4	Uncharacterized protein	bacterium	1	14.6	1.28e-06	360	47-395 (414)	2-289 (290)
AF-A0A1T4WGN6-F1-model_v4	Permease of the drug/metabolite transporter (DMT) superfamily	Paradesulfovibrio bizertensis DSM 18034	1	18.3	8.95e-08	360	48-412 (414)	3-291 (292)
AF-W8I1B5-F1-model_v4	Putative transporter, permease protein	Ensifer adhaerens OV14	1	13.8	1.51e-06	360	51-403 (414)	3-294 (299)
AF-A0A2H0RPU6-F1-model_v4	Uncharacterized protein	Candidatus Peregrinibacteria bacterium CG10_big_fil_rev_8_21_14_0_10_55_24	1	12.1	4.72e-07	360	51-394 (414)	13-296 (317)
AF-A0A315W1F0-F1-model_v4	GDP-fucose transporter 1	Gambusia affinis	1	12.8	9.73e-08	360	34-410 (414)	20-345 (444)
AF-A0A1G6WVX6-F1-model_v4	O-acetylserine/cysteine efflux transporter	Glycomyces harbinensis	1	18	3.84e-07	359	57-414 (414)	2-289 (297)
AF-A0A1V0LDB7-F1-model_v4	EamA family transporter	Kosakonia radicincitans DSM 16656	1	10.6	1.23e-06	359	51-407 (414)	5-300 (305)
AF-A0A1M6K8G5-F1-model_v4	Permease of the drug/metabolite transporter (DMT) superfamily	Dethiosulfatibacter aminovorans DSM 17477	1	13.6	1.47e-07	359	38-393 (414)	2-296 (313)
AF-A0A839JEH2-F1-model_v4	DMT family transporter	Propioniciclava sp. MC1683	1	11.2	6.06e-07	358	47-393 (414)	4-293 (310)
AF-A0A2V6PNU6-F1-model_v4	Uncharacterized protein	Candidatus Rokubacteria bacterium	1	14.3	2.47e-08	358	1-408 (414)	82-412 (412)
AF-D9QQD0-F1-model_v4	Uncharacterized protein	Acetohalobium arabaticum DSM 5501	1	15.5	8.45e-07	357	51-403 (414)	8-295 (296)
AF-A0A1M6L0R8-F1-model_v4	EamA domain-containing membrane protein RarD	Dethiosulfatibacter aminovorans DSM 17477	1	12.6	4.17e-07	357	47-407 (414)	7-291 (299)
AF-A0A3M1VLD3-F1-model_v4	DMT family transporter	Candidatus Dadabacteria bacterium	1	14.1	6.06e-07	357	47-413 (414)	3-294 (304)
AF-A0A0Q9M5G6-F1-model_v4	Uncharacterized protein	Phycicoccus sp. Soil748	1	13	9.98e-07	357	58-395 (414)	2-292 (305)
AF-A0A1L8NVI4-F1-model_v4	Drug/metabolite exporter YedA	Escherichia coli	1	15.8	4.17e-07	357	49-413 (414)	6-302 (306)
AF-A0A1S8TA49-F1-model_v4	EamA-like transporter family protein	Clostridium sp. BL-8	1	13	3.53e-07	357	43-408 (414)	3-325 (325)
AF-A0A101VBC3-F1-model_v4	Uncharacterized protein	Desulfitibacter sp. BRH_c19	1	14.9	1.6e-07	356	53-408 (414)	11-311 (311)
AF-A0A242MFZ5-F1-model_v4	Permease of the drug/metabolite transporter (DMT) superfamily	Caballeronia sordidicola	1	13	1.82e-07	356	1-401 (414)	45-365 (368)
AF-A0A838JE52-F1-model_v4	DMT family transporter	Ktedonobacteraceae bacterium	1	11.7	1.33e-06	355	51-401 (414)	5-287 (288)
AF-A0A254NUC6-F1-model_v4	EamA family transporter	Saccharibacillus sp. O23	1	13.2	1.41e-07	355	1-398 (414)	14-337 (339)
AF-A0A2V9IT30-F1-model_v4	Uncharacterized protein	Acidobacteria bacterium	1	15.7	1.58e-06	354	53-396 (414)	3-286 (287)
AF-A0A7Z0L8Z8-F1-model_v4	EamA family transporter	Gemella palaticanis	1	17.3	1.54e-07	354	47-394 (414)	5-293 (295)
AF-A0A4Z0D7C3-F1-model_v4	DMT family transporter	Soehngenia longivitae	1	12.6	7.77e-07	354	48-394 (414)	2-295 (297)
AF-A0A2V2SQR7-F1-model_v4	EamA family transporter	Candidatus Rokubacteria bacterium	1	13.3	2.33e-07	354	32-414 (414)	1-302 (303)
AF-A0A1J4MSJ6-F1-model_v4	TPT domain-containing protein	Cryptosporidium andersoni	1	13.1	1.74e-07	354	50-414 (414)	7-339 (357)
AF-A0A124IGI2-F1-model_v4	Uncharacterized protein	Desulfitibacter sp. BRH_c19	1	15.3	1.79e-06	353	40-412 (414)	2-305 (309)
AF-A0A1J5R288-F1-model_v4	EamA-like transporter family protein	mine drainage metagenome	1	13.7	6.32e-07	353	47-407 (414)	9-313 (324)
AF-T0QNL3-F1-model_v4	Uncharacterized protein	Saprolegnia diclina VS20	1	11.4	2.23e-07	353	30-414 (414)	6-345 (358)
AF-J2V911-F1-model_v4	DMT(Drug/metabolite transporter) superfamily permease	Phyllobacterium sp. YR531	1	15.2	3.19e-06	352	49-398 (414)	2-284 (285)
AF-A0A010YSN7-F1-model_v4	DMT(Drug/metabolite transporter) superfamily permease	Cloacibacillus evryensis DSM 19522	1	17.5	4.34e-07	352	44-392 (414)	9-290 (293)
AF-A0A3M1VAH8-F1-model_v4	DMT family transporter	Euryarchaeota archaeon	1	15.6	2.75e-07	352	27-394 (414)	7-302 (310)
AF-A0A2D7K4L8-F1-model_v4	EamA domain-containing protein	Marinovum sp.	1	11.5	5.13e-07	352	47-410 (414)	3-312 (312)
AF-A0A1I5XWZ8-F1-model_v4	Threonine/homoserine efflux transporter RhtA	Roseivivax halotolerans	1	13.9	2.39e-06	351	50-414 (414)	2-291 (291)
AF-A0A3N5UYZ9-F1-model_v4	DMT family transporter	Chloroflexi bacterium	1	13	7.46e-07	351	47-394 (414)	4-292 (294)
AF-A0A066UQ40-F1-model_v4	Multidrug DMT transporter permease	Vibrio fortis	1	12	1.58e-06	351	47-414 (414)	3-302 (303)
AF-A0A538R6P0-F1-model_v4	DMT family transporter	Candidatus Rokubacteria bacterium	1	15.4	4.17e-07	351	49-414 (414)	6-301 (317)
AF-A0A4Q9R4E4-F1-model_v4	EamA/RhaT family transporter	Pseudomonas dryadis	1	14.7	7.46e-07	350	48-398 (414)	3-283 (284)
AF-A0A6B2LBE2-F1-model_v4	TPT domain-containing protein	Arcella intermedia	1	13.9	1.58e-06	350	54-408 (414)	2-295 (295)
AF-A0A1F6PD58-F1-model_v4	Drug/metabolite exporter YedA	Candidatus Margulisbacteria bacterium GWD2_39_127	1	12.9	1.18e-06	350	49-403 (414)	12-297 (301)
AF-A0A1G0G2Z5-F1-model_v4	Uncharacterized protein	Gammaproteobacteria bacterium RIFCSPHIGHO2_12_FULL_35_23	1	12.8	6.58e-07	350	51-408 (414)	2-307 (307)
AF-A0A8A9HYI5-F1-model_v4	EamA family transporter	Curtobacterium flaccumfaciens pv. flaccumfaciens	1	12.6	7.15e-07	350	26-401 (414)	1-294 (313)
AF-A0A5C7MDW1-F1-model_v4	DMT family transporter	Gammaproteobacteria bacterium	1	12.8	5.81e-07	350	5-406 (414)	1-317 (318)
AF-A0A543CWU4-F1-model_v4	Drug/metabolite transporter (DMT)-like permease	Actinoallomurus bryophytorum	1	14.4	5.13e-07	350	22-407 (414)	1-304 (325)
AF-A0A151EDL4-F1-model_v4	Uncharacterized protein	Candidatus Proteinoplasmatales archaeon SG8-5	1	15.9	8.81e-07	349	53-414 (414)	6-306 (306)
AF-A9U2X2-F1-model_v4	Predicted protein	Physcomitrium patens	1	11.6	3.9e-08	349	1-408 (414)	79-440 (440)
AF-A0A1J4MS56-F1-model_v4	TPT domain-containing protein	Cryptosporidium andersoni	1	15	6.16e-08	349	1-414 (414)	25-399 (497)
AF-A0A359IU38-F1-model_v4	EamA family transporter	Propionibacteriaceae bacterium	1	15.2	1.08e-06	348	56-407 (414)	2-283 (290)
AF-A0A0N0TXC7-F1-model_v4	Membrane protein	Streptomyces sp. NRRL F-7442	1	13.7	2.23e-07	348	13-414 (414)	1-310 (329)
AF-A0A315BW60-F1-model_v4	Uncharacterized protein	Limnohabitans sp. JirII-29	1	13.6	2.99e-07	348	20-413 (414)	7-332 (332)
AF-A0A411DWP1-F1-model_v4	Int-tm_transporter_28	Parasacculina yatsui	1	13.1	3.59e-08	348	33-414 (414)	3-364 (366)
AF-A0A085NG00-F1-model_v4	TPT domain-containing protein	Trichuris suis	1	14	1.67e-07	348	35-414 (414)	2-321 (420)
AF-A0A3D0FN48-F1-model_v4	EamA/RhaT family transporter	Bacteroidales bacterium	1	14	9.57e-07	347	44-398 (414)	3-294 (295)
AF-A0A3D3EW38-F1-model_v4	EamA family transporter	Candidatus Cloacimonas sp.	1	15.9	6.58e-07	347	50-414 (414)	2-297 (298)
AF-A0A6I3SHE6-F1-model_v4	EamA family transporter	Heliobacterium mobile	1	16.8	1.3e-07	347	46-414 (414)	10-301 (301)
AF-A0A1G6T309-F1-model_v4	Permease of the drug/metabolite transporter (DMT) superfamily	Kordiimonas lacus	1	15.7	1.06e-07	347	42-411 (414)	2-303 (303)
AF-G7Z601-F1-model_v4	Uncharacterized protein	Azospirillum lipoferum 4B	1	15.3	1.47e-07	347	51-394 (414)	18-301 (305)
AF-A0A4R6VXC2-F1-model_v4	Threonine/homoserine efflux transporter RhtA	Maritalea mobilis	1	10.8	1.33e-06	347	34-414 (414)	8-323 (325)
AF-A0A2N1QPU0-F1-model_v4	EamA/RhaT family transporter	Synergistetes bacterium HGW-Synergistetes-2	1	13.5	1.2e-07	347	4-406 (414)	1-338 (339)
AF-A0A841ERC2-F1-model_v4	Drug/metabolite transporter (DMT)-like permease	Arcicella rosea	1	15.3	2.29e-06	346	51-400 (414)	3-286 (287)
AF-A0A1Y5IEP8-F1-model_v4	Putative phosphate/phosphoenolpyruvate translocator protein	Ostreococcus tauri	1	12.2	4.42e-08	346	1-404 (414)	22-404 (406)
AF-A0A3D9VH38-F1-model_v4	EamA domain-containing membrane protein RarD	Bacillus mycoides	1	13.6	8.11e-07	345	46-393 (414)	2-289 (295)
AF-A0A7T4X3I8-F1-model_v4	EamA family transporter	Jeotgalicoccus sp. ATCC 8456	1	15.1	4.53e-07	345	44-394 (414)	2-294 (300)
AF-M0ILZ6-F1-model_v4	DMT (Drug/metabolite family transporter) superfamily permease	Haloferax mucosum ATCC BAA-1512	1	12.5	1.58e-06	345	31-414 (414)	1-317 (325)
AF-A0A1I7K6R9-F1-model_v4	Permease of the drug/metabolite transporter (DMT) superfamily	Alicyclobacillus macrosporangiidus	1	13.6	8.81e-07	345	50-414 (414)	16-317 (326)
AF-A0A7U3UZR5-F1-model_v4	Putative integral membrane protein	Streptomyces sp. SN-593	1	13.9	2.33e-07	345	48-414 (414)	13-396 (403)
AF-A0A2N7DEX8-F1-model_v4	Uncharacterized protein	Vibrio sp. 10N.286.49.B3	1	13.6	1.33e-06	344	51-397 (414)	3-277 (281)
AF-A0A5N3S189-F1-model_v4	DMT family transporter	Vibrio fortis	1	14.2	1.18e-06	344	48-407 (414)	2-287 (292)
AF-A0A1F8HA33-F1-model_v4	Uncharacterized protein	Candidatus Yanofskybacteria bacterium RIFCSPLOWO2_12_FULL_43_11b	1	11.4	1.51e-06	344	49-394 (414)	4-286 (294)
AF-A0A3A9BBI3-F1-model_v4	DMT family transporter	bacterium D16-34	1	16.2	1.67e-07	344	51-411 (414)	14-314 (331)
AF-A0A353B164-F1-model_v4	Uncharacterized protein	Planctomycetaceae bacterium	1	18.2	1.41e-07	344	22-407 (414)	3-326 (358)
AF-A0A074TRL8-F1-model_v4	Membrane protein	Thioclava dalianensis	1	13.8	3.47e-06	343	53-410 (414)	2-284 (284)
AF-A0A4Z0D7D7-F1-model_v4	EamA/RhaT family transporter	Soehngenia longivitae	1	17	2.64e-07	343	47-398 (414)	4-288 (289)
AF-A0A842TZV7-F1-model_v4	EamA family transporter	Candidatus Lokiarchaeota archaeon	1	12.2	1.33e-06	343	49-394 (414)	7-308 (313)
AF-A0A7C8RGL6-F1-model_v4	Triose-phosphate Transporter	Orbilia oligospora	1	15	3.9e-08	343	1-407 (414)	125-554 (590)
AF-A0A316CQ46-F1-model_v4	EamA domain-containing membrane protein RarD	Oceanotoga teriensis	1	14.1	4.92e-07	342	48-396 (414)	2-284 (287)
AF-A0A538KI84-F1-model_v4	DMT family transporter	Actinomycetia bacterium	1	14.7	3.33e-06	342	55-411 (414)	2-287 (287)
AF-A0A3C1FBK5-F1-model_v4	Uncharacterized protein	Propionibacteriaceae bacterium	1	10.8	2.99e-07	342	51-395 (414)	3-293 (294)
AF-A0A1U9JRH1-F1-model_v4	Uncharacterized protein	Aquaspirillum sp. LM1	1	13.8	1.28e-06	342	50-393 (414)	6-290 (295)
AF-A0A2E8IUC8-F1-model_v4	Uncharacterized protein	bacterium	1	13.7	1.86e-06	342	47-408 (414)	6-302 (302)
AF-A3IS88-F1-model_v4	Uncharacterized protein	Crocosphaera chwakensis CCY0110	1	14.9	4.53e-07	342	51-414 (414)	3-336 (336)
AF-A0A7G6RPT3-F1-model_v4	DMT family transporter	Rhizobium lusitanum	1	16.6	1.08e-06	341	48-395 (414)	5-286 (286)
AF-A0A538R1P4-F1-model_v4	DMT family transporter	Candidatus Rokubacteria bacterium	1	15.2	2.6e-06	341	46-394 (414)	3-289 (293)
AF-A0A2H0RQE9-F1-model_v4	Uncharacterized protein	Candidatus Peregrinibacteria bacterium CG10_big_fil_rev_8_21_14_0_10_55_24	1	15.5	9.18e-07	341	44-414 (414)	2-298 (307)
AF-A0A1W0WGU1-F1-model_v4	Putative Solute carrier family 35 member G1	Hypsibius dujardini	1	14.6	8.24e-08	341	1-413 (414)	68-451 (470)
AF-A0A1F5JPK7-F1-model_v4	Uncharacterized protein	Candidatus Daviesbacteria bacterium RIFCSPHIGHO2_02_FULL_36_13	1	13.8	1.13e-06	340	51-400 (414)	3-291 (292)
AF-I1LT42-F1-model_v4	Uncharacterized protein	Glycine max	1	11.2	2.64e-07	340	11-400 (414)	1-362 (363)
AF-A0A286UJ46-F1-model_v4	TPT-domain-containing	Pyrrhoderma noxium	1	12.9	3.04e-08	340	1-414 (414)	26-422 (555)
AF-A0A432F408-F1-model_v4	EamA/RhaT family transporter	Aquificaceae bacterium	1	12.4	1.94e-06	339	51-414 (414)	5-291 (292)
AF-A0A1Y2F9F1-F1-model_v4	TPT domain-containing protein	Neocallimastix californiae	1	14.4	2.82e-06	339	50-400 (414)	2-301 (302)
AF-A0A6M0QB94-F1-model_v4	DMT family transporter	Bacillus mesophilus	1	15.4	2.53e-07	339	47-404 (414)	5-303 (304)
AF-A0A090M166-F1-model_v4	Triose-phosphate transporter domain	Ostreococcus tauri	1	13.9	2.64e-07	339	35-404 (414)	46-359 (361)
AF-A0A7Y4P5E0-F1-model_v4	EamA family transporter	Pelistega europaea	1	12.5	5.96e-06	338	50-406 (414)	4-294 (295)
AF-A0A3N5UUR5-F1-model_v4	DMT family transporter	Chloroflexi bacterium	1	15.1	3.47e-06	338	50-395 (414)	4-297 (298)
AF-A0A3A9BA37-F1-model_v4	EamA family transporter	bacterium D16-34	1	14.4	3.25e-07	338	44-396 (414)	7-306 (308)
AF-A0A7S1Y702-F1-model_v4	Hypothetical protein	Grammatophora oceanica	1	11.4	5.81e-07	338	49-407 (414)	8-315 (344)
AF-A0A1G7AYX9-F1-model_v4	Threonine/homoserine efflux transporter RhtA	Glycomyces harbinensis	1	12.8	1.74e-07	338	1-407 (414)	7-362 (370)
AF-A0A4D8YMJ9-F1-model_v4	Probable purine permease	Salvia splendens	1	11.6	7.27e-08	338	19-414 (414)	171-528 (529)
AF-A0A1X7JGW0-F1-model_v4	Uncharacterized membrane protein	Paracoccus sp. J56	1	12.1	1.28e-06	337	45-414 (414)	2-300 (300)
AF-A0A1Y5IAU2-F1-model_v4	DMT family transporter: phosphate/phosphoenolpyruvate	Ostreococcus tauri	1	12.9	3.77e-06	337	49-406 (414)	2-307 (308)
AF-A0A4D8Y867-F1-model_v4	Solute carrier family 35, member E1	Salvia splendens	1	13.5	2.68e-08	337	1-414 (414)	40-411 (411)
AF-A0A7G7FFP1-F1-model_v4	DMT family transporter	Aeromonas hydrophila	1	11.2	4.65e-06	336	51-397 (414)	3-299 (301)
AF-A0A099PFB2-F1-model_v4	Uncharacterized protein	Nitrincola sp. A-D6	1	11.9	3.84e-07	336	44-395 (414)	2-296 (307)
AF-A0A2V9WHT6-F1-model_v4	Uncharacterized protein	Acidobacteria bacterium	1	12.3	5.35e-07	336	33-413 (414)	4-318 (351)
AF-A0A1Y5I400-F1-model_v4	Glucose-6-phosphate/phosphate and phosphoenolpyruvate/phosphate antiporter	Ostreococcus tauri	1	11.5	2.14e-07	336	13-414 (414)	2-355 (355)
AF-I1MA53-F1-model_v4	WAT1-related protein	Glycine max	1	11.3	3.68e-07	336	34-414 (414)	5-349 (363)
AF-I1MTG4-F1-model_v4	TPT domain-containing protein	Glycine max	1	13.9	1.15e-07	336	1-412 (414)	37-382 (382)
AF-A0A1S8TLV1-F1-model_v4	EamA-like transporter family protein	Clostridium sp. BL-8	1	18	2.99e-07	335	49-402 (414)	7-295 (297)
AF-A0A1L3ZJ39-F1-model_v4	ABC transporter permease	Rhizobium leguminosarum	1	13.1	4.84e-06	334	46-392 (414)	4-275 (276)
AF-U7GHH9-F1-model_v4	Uncharacterized protein	Labrenzia sp. C1B10	1	12.8	3.62e-06	334	43-399 (414)	4-286 (292)
AF-A0A4R6VXN0-F1-model_v4	Drug/metabolite transporter (DMT)-like permease	Maritalea mobilis	1	13.7	3.19e-06	334	51-414 (414)	10-302 (311)
AF-A0A7Y2HVU0-F1-model_v4	EamA family transporter	Phycisphaerales bacterium	1	12.6	2.33e-07	334	31-414 (414)	1-314 (334)
AF-A0A4V3RYF9-F1-model_v4	EamA/RhaT family transporter	Marinicauda algicola	1	16.9	7.9e-08	334	22-414 (414)	5-336 (336)
AF-A0A1W0WNC8-F1-model_v4	EamA domain-containing protein	Hypsibius dujardini	1	18	1.5e-08	334	1-414 (414)	97-486 (496)
AF-A0A1G0G071-F1-model_v4	Uncharacterized protein	Gammaproteobacteria bacterium RIFCSPHIGHO2_12_FULL_35_23	1	10.4	3.19e-06	333	46-394 (414)	9-292 (293)
AF-A0A7W7YV77-F1-model_v4	Drug/metabolite transporter (DMT)-like permease	Shinella fusca	1	15.4	2.39e-06	333	49-397 (414)	3-290 (295)
AF-A0A126UX53-F1-model_v4	EamA domain-containing protein	Falsihalocynthiibacter arcticus	1	12.1	8.45e-07	333	46-410 (414)	7-304 (304)
AF-A0A7D4PUK9-F1-model_v4	DMT family transporter	Microbacterium hominis	1	12.6	2.71e-06	333	22-414 (414)	5-313 (316)
AF-A0A6H5J3C9-F1-model_v4	Uncharacterized protein	Trichogramma brassicae	1	11.1	9.57e-07	333	47-394 (414)	3-306 (321)
AF-A0A2G2JW37-F1-model_v4	Uncharacterized protein	Blastopirellula sp.	1	15.1	3.12e-07	333	1-407 (414)	2-352 (356)
AF-A0A849ZEI8-F1-model_v4	DMT family transporter	Candidatus Sumerlaeia bacterium	1	13.9	7.46e-07	332	46-395 (414)	10-290 (291)
AF-A0A315CZH2-F1-model_v4	EamA family transporter	Limnohabitans sp. Hippo4	1	12.9	1.08e-06	332	53-395 (414)	13-297 (303)
AF-A0A0F5PDC5-F1-model_v4	Uncharacterized protein	Sphingomonas sp. SRS2	1	13.5	1.71e-06	332	22-394 (414)	1-298 (305)
AF-A0A3C1ACJ3-F1-model_v4	EamA family transporter	Bacteroidales bacterium	1	11.6	1.71e-06	332	35-403 (414)	2-307 (308)
AF-A0A538JWY6-F1-model_v4	Uncharacterized protein	Actinomycetia bacterium	1	10	3.93e-06	332	49-394 (414)	11-290 (312)
AF-T0Q2S1-F1-model_v4	Uncharacterized protein	Saprolegnia diclina VS20	1	12.5	3.12e-07	332	36-412 (414)	2-309 (332)
AF-A0A2K9Z3A9-F1-model_v4	Putative permease	Rhizobium leguminosarum	1	11.1	3.68e-07	332	1-406 (414)	4-369 (370)
AF-A0A812ETX9-F1-model_v4	Uncharacterized protein	Candidatus Nitrosotenuis uzonensis	1	15.9	7.46e-07	331	33-398 (414)	16-325 (326)
AF-A0A1F7H652-F1-model_v4	Uncharacterized protein	Candidatus Roizmanbacteria bacterium RIFCSPHIGHO2_02_FULL_39_9	1	13.3	4.34e-07	330	46-411 (414)	2-302 (302)
AF-A0A842VVK2-F1-model_v4	EamA family transporter	Candidatus Lokiarchaeota archaeon	1	15.2	4.65e-06	329	57-394 (414)	2-278 (287)
AF-A3DMB1-F1-model_v4	Uncharacterized protein	Staphylothermus marinus F1	1	12.3	1.94e-06	329	13-405 (414)	1-308 (309)
AF-A0A3D3LWN8-F1-model_v4	EamA family transporter	Rothia sp.	1	12.5	1.71e-06	329	44-414 (414)	9-307 (313)
AF-A0A3C1FD61-F1-model_v4	EamA family transporter	Propionibacteriaceae bacterium	1	12.8	1.33e-06	329	51-414 (414)	8-298 (328)
AF-A0A101VC45-F1-model_v4	Uncharacterized protein	Desulfitibacter sp. BRH_c19	1	13.1	1.18e-06	329	36-393 (414)	3-318 (331)
AF-A0A0K8W6H6-F1-model_v4	UDP-sugar transporter UST74c	Bactrocera latifrons	1	12.3	5.35e-07	329	22-413 (414)	1-344 (354)
AF-A0A1L8D171-F1-model_v4	EamA family transporter	Carboxydothermus islandicus	1	14.2	9.57e-07	328	46-394 (414)	4-288 (290)
AF-A0A0Q8PR89-F1-model_v4	Uncharacterized protein	Nocardioides sp. Root190	1	13.1	4.1e-06	328	57-414 (414)	3-298 (298)
AF-J8JWE3-F1-model_v4	Uncharacterized protein	Bacillus cereus VD107	1	11.1	6.48e-06	328	51-407 (414)	9-299 (301)
AF-A0A316AYR6-F1-model_v4	Drug/metabolite transporter (DMT)-like permease	Fibrobacter sp. UWR4	1	19.8	2.87e-07	328	48-394 (414)	4-296 (302)
AF-A0A087SM36-F1-model_v4	Solute carrier family 35 member E3	Auxenochlorella protothecoides	1	12.9	1.28e-06	328	46-413 (414)	2-316 (351)
AF-A0A842VGU3-F1-model_v4	EamA family transporter	Candidatus Lokiarchaeota archaeon	1	12.5	4.34e-07	328	42-394 (414)	2-289 (372)
AF-A0A7C7LE97-F1-model_v4	DMT family transporter	Candidatus Poribacteria bacterium	1	17.2	3.47e-06	327	49-404 (414)	4-286 (287)
AF-A0A7X2JER5-F1-model_v4	EamA family transporter	Eubacterium sp. BIOML-A2	1	11.8	5.26e-06	327	46-406 (414)	2-287 (288)
AF-I1MGS5-F1-model_v4	Uncharacterized protein	Glycine max	1	14.8	4e-07	327	44-410 (414)	20-345 (358)
AF-A0A087SNS7-F1-model_v4	Putative sugar phosphate/phosphate translocator	Auxenochlorella protothecoides	1	10.1	1.97e-07	327	1-407 (414)	1-377 (447)
AF-A0A3N2B9H3-F1-model_v4	Drug/metabolite transporter (DMT)-like permease	Bogoriella caseilytica	1	12.4	3.33e-06	327	51-395 (414)	8-291 (461)
AF-Q1N008-F1-model_v4	Uncharacterized protein	Bermanella marisrubri	1	13.2	2.82e-06	326	51-398 (414)	10-296 (296)
AF-A0A0A8B4D9-F1-model_v4	Uncharacterized protein	Berryella intestinalis	1	15.4	5.72e-06	326	50-412 (414)	2-296 (296)
AF-I7EVG4-F1-model_v4	Uncharacterized protein	Phaeobacter inhibens DSM 17395	1	11	6.48e-06	326	50-399 (414)	5-292 (296)
AF-A0A0G0RE70-F1-model_v4	Uncharacterized protein	Candidatus Woesebacteria bacterium GW2011_GWA1_39_21	1	14.9	1.28e-06	326	47-393 (414)	4-297 (308)
AF-A0A094QFJ0-F1-model_v4	Uncharacterized protein	freshwater metagenome	1	11.6	2.82e-06	326	48-414 (414)	12-323 (324)
AF-A0A6N7ZW00-F1-model_v4	DMT family transporter	Roseibium sp. RKSG952	1	10.6	2.6e-06	326	2-393 (414)	1-318 (327)
AF-A0A371P9Q0-F1-model_v4	EamA family transporter	Aeromicrobium endophyticum	1	11.2	5.13e-07	326	1-403 (414)	10-344 (351)
AF-A0A286UWZ8-F1-model_v4	UDP-galactose transporter	Pyrrhoderma noxium	1	11.8	1.15e-07	326	1-394 (414)	89-461 (641)
AF-A0A660C721-F1-model_v4	Threonine/homoserine efflux transporter RhtA	Prauserella rugosa	1	12.9	5.26e-06	325	51-403 (414)	2-282 (283)
AF-A0A7U4U8X9-F1-model_v4	Threonine transporter	Aeromonas hydrophila	1	13.4	5.49e-06	325	46-403 (414)	3-282 (284)
AF-A9DFZ1-F1-model_v4	Permease of the drug/metabolite transporter (DMT) superfamily	Hoeflea phototrophica DFL-43	1	14.4	1.08e-06	325	47-407 (414)	2-288 (291)
AF-A0A318CBU2-F1-model_v4	Uncharacterized protein	Pokkaliibacter plantistimulans	1	13.1	3.33e-06	325	51-413 (414)	3-289 (299)
AF-A0A5J6N2W7-F1-model_v4	Uncharacterized protein	Hypericibacter adhaerens	1	12.3	7.04e-06	325	50-393 (414)	16-299 (302)
AF-A0A2M8DQX0-F1-model_v4	Uncharacterized protein	Candidatus Komeilibacteria bacterium CG_4_9_14_0_8_um_filter_36_9	1	14.9	1.23e-06	325	44-403 (414)	2-297 (303)
AF-A0A1J4MTS5-F1-model_v4	TPT domain-containing protein	Cryptosporidium andersoni	1	13.9	2.8e-08	325	1-414 (414)	3-478 (682)
AF-A0A3S0YZW1-F1-model_v4	DMT family transporter	Halomonas nanhaiensis	1	12.5	3.47e-06	324	46-402 (414)	14-307 (308)
AF-A0A087SF99-F1-model_v4	UDP-glucuronic acid/UDP-N-acetylgalactosamine transporter	Auxenochlorella protothecoides	1	11.5	3.39e-07	324	48-414 (414)	16-334 (366)
AF-A0A1G0FWM9-F1-model_v4	Uncharacterized protein	Gammaproteobacteria bacterium RIFCSPHIGHO2_12_FULL_35_23	1	13.9	1.58e-06	323	46-399 (414)	8-292 (293)
AF-A0A1G0G315-F1-model_v4	Uncharacterized protein	Gammaproteobacteria bacterium RIFCSPHIGHO2_12_FULL_35_23	1	13	3.06e-06	323	51-414 (414)	6-305 (305)
AF-A0A1F6AGU4-F1-model_v4	Uncharacterized protein	Candidatus Gottesmanbacteria bacterium RIFCSPLOWO2_01_FULL_43_11b	1	14.1	1.94e-06	323	47-394 (414)	3-296 (306)
AF-B7RQ36-F1-model_v4	Possible transporter, RhaT family, DMT superfamily	Roseobacter sp. GAI101	1	11.5	2.2e-06	323	22-403 (414)	2-322 (323)
AF-A0A5J6N675-F1-model_v4	Membrane protein	Hypericibacter adhaerens	1	11.9	9.57e-07	323	26-414 (414)	1-328 (333)
AF-A0A0N4WQ23-F1-model_v4	Uncharacterized protein	Haemonchus placei	1	11.7	8.81e-07	323	46-395 (414)	5-350 (354)
AF-A0A1D1ZWM9-F1-model_v4	Uncharacterized protein	Auxenochlorella protothecoides	1	14.2	2.33e-07	323	1-401 (414)	13-382 (383)
AF-A0A1H3IYF2-F1-model_v4	Permease of the drug/metabolite transporter (DMT) superfamily	Eubacterium barkeri	1	14.3	6.48e-06	322	47-392 (414)	3-273 (285)
AF-A0A1M6M3S8-F1-model_v4	Permease of the drug/metabolite transporter (DMT) superfamily	Dethiosulfatibacter aminovorans DSM 17477	1	14	6.86e-07	322	47-397 (414)	4-291 (306)
AF-G7W5B7-F1-model_v4	DMT(Drug/metabolite transporter) superfamily permease	Desulfosporosinus orientis DSM 765	1	12.5	4.65e-06	322	44-414 (414)	4-311 (311)
AF-A0A7C3US22-F1-model_v4	DMT family transporter	Candidatus Poribacteria bacterium	1	10.2	7.34e-06	322	32-401 (414)	1-318 (318)
AF-A0A6I2XXP9-F1-model_v4	EamA family transporter	Actinomycetia bacterium	1	13.5	7.65e-06	321	44-414 (414)	4-309 (321)
AF-A0A0Q8AXG0-F1-model_v4	Uncharacterized protein	Rhizobium sp. Root564	1	10.8	9.18e-07	321	22-395 (414)	7-312 (322)
AF-A0A1J0ADJ1-F1-model_v4	Permeases of the drug/metabolite transporter (DMT) superfamily	Gloeomargarita lithophora Alchichica-D10	1	16.3	9.18e-07	321	51-412 (414)	6-317 (329)
AF-A0A2G2K6N3-F1-model_v4	EamA family transporter	Blastopirellula sp.	1	14.8	2.94e-06	320	53-403 (414)	4-290 (292)
AF-A0A552LWF7-F1-model_v4	DMT family transporter	Microcystis flos-aquae Mf_WU_F_19750830_S460	1	14.5	1.79e-06	320	46-393 (414)	8-298 (300)
AF-I1MSJ6-F1-model_v4	TPT domain-containing protein	Glycine max	1	13.8	6.06e-07	320	29-414 (414)	16-362 (378)
AF-I1MC70-F1-model_v4	WAT1-related protein	Glycine max	1	10.1	1.33e-06	320	23-414 (414)	1-374 (389)
AF-A0A7Y3NK05-F1-model_v4	EamA family transporter	Sphingomonas sp. ID1715	1	14.5	3.93e-06	319	59-404 (414)	2-277 (278)
AF-A0A2D5IID2-F1-model_v4	EamA family transporter	Marinovum sp.	1	11.8	4.84e-06	318	45-403 (414)	4-291 (295)
AF-A0A3D3M0I0-F1-model_v4	EamA family transporter RarD	Rothia sp.	1	12.9	2.82e-06	318	48-407 (414)	10-303 (305)
AF-A0A090M1U1-F1-model_v4	Drug/metabolite transporter	Ostreococcus tauri	1	15.1	7.46e-07	318	1-400 (414)	55-375 (376)
AF-A0A672U352-F1-model_v4	Solute carrier family 35 member A2	Strigops habroptila	1	10.9	1.1e-07	318	23-414 (414)	1-369 (383)
AF-A0A3M3DAK5-F1-model_v4	Uncharacterized protein	Pseudomonas amygdali pv. lachrymans	1	17	2.99e-07	318	2-394 (414)	61-372 (383)
AF-A0A1E4EK28-F1-model_v4	Multidrug DMT transporter permease	bacterium SCN 62-11	1	11.3	5.05e-06	317	50-398 (414)	4-291 (295)
AF-A0A5J6N3C2-F1-model_v4	Uncharacterized protein	Hypericibacter adhaerens	1	11.7	5.96e-06	317	31-414 (414)	1-322 (323)
AF-M5PRT9-F1-model_v4	DMT(Drug/metabolite transporter) superfamily permease	Desulfocurvibacter africanus PCS	1	12.4	2.39e-06	317	29-414 (414)	1-328 (329)
AF-C4L9D4-F1-model_v4	Uncharacterized protein	Tolumonas auensis DSM 9187	1	11.7	7.04e-06	316	52-395 (414)	3-273 (283)
AF-A0A377G6E6-F1-model_v4	Probable amino-acid metabolite efflux pump	Fluoribacter dumoffii	1	13.6	5.72e-06	316	51-414 (414)	5-297 (297)
AF-A0A3M1KFT5-F1-model_v4	DMT family transporter	Candidatus Dadabacteria bacterium	1	12.9	3.47e-06	316	51-413 (414)	6-283 (301)
AF-A0A1M6IC80-F1-model_v4	Permease of the drug/metabolite transporter (DMT) superfamily	Dethiosulfatibacter aminovorans DSM 17477	1	12.1	2.11e-06	316	49-393 (414)	7-289 (303)
AF-A0A3N9UEA9-F1-model_v4	DMT family transporter	Lysinibacillus composti	1	15.1	1.51e-06	316	41-414 (414)	2-316 (319)
AF-A0A5C9D6X1-F1-model_v4	Uncharacterized protein	Spirochaetes bacterium	1	14.6	6.86e-07	316	47-414 (414)	9-314 (326)
AF-A0A7S0Q5V3-F1-model_v4	Hypothetical protein	Coccolithus braarudii	1	12.3	1.45e-06	316	53-394 (414)	9-323 (344)
AF-C6TIF5-F1-model_v4	WAT1-related protein	Glycine max	1	13.3	5.81e-07	316	45-414 (414)	4-343 (350)
AF-A0A7Y5C0S4-F1-model_v4	DMT family transporter	Flavobacteriales bacterium	1	15	8.45e-07	315	46-394 (414)	2-289 (294)
AF-A0A1F6PTU1-F1-model_v4	Uncharacterized protein	Candidatus Margulisbacteria bacterium GWD2_39_127	1	13.2	2.11e-06	315	44-392 (414)	5-281 (298)
AF-K0MRV6-F1-model_v4	Membrane protein, putative	Lacticaseibacillus paracasei	1	13.5	1.71e-06	315	47-414 (414)	63-346 (348)
AF-A0A1H6U8I7-F1-model_v4	O-acetylserine/cysteine efflux transporter	Demequina mangrovi	1	12.6	5.05e-06	314	51-414 (414)	5-292 (304)
AF-A0A7M1KYG2-F1-model_v4	DMT family transporter	Comamonas thiooxydans	1	14.3	3.06e-06	314	31-400 (414)	1-308 (309)
AF-A0A3M1UAJ2-F1-model_v4	DMT family transporter	Euryarchaeota archaeon	1	12.2	9.18e-07	314	48-414 (414)	5-313 (313)
AF-A0A2N3IC30-F1-model_v4	EamA-like transporter family	Raineya orbicola	1	13.2	1.23e-06	314	51-414 (414)	8-315 (317)
AF-A0A0V8TAI6-F1-model_v4	Uncharacterized protein	Cellulomonas sp. B6	1	14.8	4.1e-06	314	51-394 (414)	5-287 (327)
AF-A0A521LGP9-F1-model_v4	EamA/RhaT family transporter	Nitrospirae bacterium	1	15.6	2.71e-06	314	34-414 (414)	2-309 (360)
AF-A0A1B0CRW3-F1-model_v4	Ubiquinone biosynthesis protein COQ4 homolog, mitochondrial	Lutzomyia longipalpis	1	12.6	1.67e-07	314	1-397 (414)	170-509 (789)
AF-A0A536PBY9-F1-model_v4	DMT family transporter	Chloroflexi bacterium	1	14.5	7.46e-07	313	51-407 (414)	7-301 (303)
AF-A0A3N5UMT2-F1-model_v4	EamA family transporter	Chloroflexi bacterium	1	12.4	7.34e-06	313	49-414 (414)	3-310 (310)
AF-T0PXH3-F1-model_v4	RarD protein	Saprolegnia diclina VS20	1	9.3	5.26e-06	313	48-414 (414)	3-306 (313)
AF-A0A096PA22-F1-model_v4	Triose-phosphate transporter domain	Ostreococcus tauri	1	12.7	1.6e-07	313	1-402 (414)	22-393 (394)
AF-A3DME4-F1-model_v4	Uncharacterized protein	Staphylothermus marinus F1	1	14.6	4.27e-06	312	46-393 (414)	2-281 (284)
AF-A0A345ZAV4-F1-model_v4	EamA family transporter	Candidatus Chromulinivorax destructor	1	12.8	5.05e-06	312	53-400 (414)	2-299 (304)
AF-A0A2V8RYC4-F1-model_v4	Uncharacterized protein	Acidobacteria bacterium	1	16.2	1.13e-06	312	47-394 (414)	8-293 (305)
AF-A0A7W2A8R4-F1-model_v4	EamA family transporter	Paenactinomyces guangxiensis	1	13.9	9.03e-06	312	52-414 (414)	2-306 (306)
AF-A0A3M1VGF7-F1-model_v4	EamA domain-containing protein	Euryarchaeota archaeon	1	13	5.49e-06	312	51-395 (414)	3-304 (306)
AF-A0A3D1DJZ8-F1-model_v4	Uncharacterized protein	Planctomycetaceae bacterium	1	14.1	3.33e-06	312	46-394 (414)	15-305 (311)
AF-A0A2Z5ZKF9-F1-model_v4	Drug/metabolite transporter integral membrane protein	Acetobacter orientalis	1	11.6	1.18e-06	312	1-410 (414)	1-332 (359)
AF-A0A149VPQ0-F1-model_v4	O-acetylserine/cysteine export protein	Ferrovum sp. PN-J185	1	14	3.06e-06	311	43-398 (414)	5-278 (280)
AF-A0A0S3KB17-F1-model_v4	Uncharacterized protein	Enterococcus silesiacus	1	15.4	7.46e-07	311	44-404 (414)	4-304 (307)
AF-A0A6C0P7K2-F1-model_v4	DMT family transporter	Paenibacillus rhizovicinus	1	15.4	2.75e-07	311	51-414 (414)	30-328 (328)
AF-A0A534XQ28-F1-model_v4	Uncharacterized protein	Deltaproteobacteria bacterium	1	12.7	3.77e-06	311	1-414 (414)	1-330 (339)
AF-A0A1M5NKT4-F1-model_v4	Drug/metabolite transporter, DME family	Streptoalloteichus hindustanus	1	11.8	7.97e-06	311	40-395 (414)	2-294 (339)
AF-W8IQJ4-F1-model_v4	Uncharacterized protein	Ensifer adhaerens OV14	1	12.9	1.08e-06	311	22-413 (414)	15-335 (349)
AF-A0A1Z4T557-F1-model_v4	Uncharacterized protein	Calothrix sp. NIES-4105	1	12.2	1.94e-06	311	53-407 (414)	15-325 (352)
AF-A0A4R6VKG2-F1-model_v4	EamA-like transporter family protein	Maritalea mobilis	1	11.6	2.94e-06	310	47-408 (414)	3-303 (303)
AF-A0A7J5QP28-F1-model_v4	DMT family transporter	Bacteroides xylanisolvens	1	11.8	5.72e-06	310	53-414 (414)	8-303 (303)
AF-A0A840X8U0-F1-model_v4	Putative blue pigment (Indigoidine) exporter	Chryseoglobus frigidaquae	1	13.5	5.96e-06	310	46-414 (414)	2-305 (317)
AF-A0A096PBN3-F1-model_v4	Triose-phosphate transporter domain	Ostreococcus tauri	1	9.4	2.94e-06	310	34-413 (414)	9-340 (343)
AF-J8JXH1-F1-model_v4	Uncharacterized protein	Bacillus cereus VD107	1	16.2	2.82e-06	309	50-395 (414)	6-287 (295)
AF-A0A7Y5HDN2-F1-model_v4	DMT family transporter	Candidatus Brocadiae bacterium	1	12.8	3.33e-06	309	24-414 (414)	1-315 (321)
AF-A0A7S1Y3D9-F1-model_v4	Hypothetical protein	Grammatophora oceanica	1	13.7	2.71e-06	309	53-407 (414)	3-312 (324)
AF-I1LF77-F1-model_v4	WAT1-related protein	Glycine max	1	12.2	4.65e-06	309	41-407 (414)	2-334 (347)
AF-S5T576-F1-model_v4	Uncharacterized protein	Corynebacterium maris DSM 45190	1	13.1	1.08e-06	309	48-414 (414)	3-344 (373)
AF-A0A853CBR9-F1-model_v4	Drug/metabolite transporter (DMT)-like permease	Nocardioides thalensis	1	15.3	2.82e-06	308	54-414 (414)	2-297 (297)
AF-A0A2M7U3P7-F1-model_v4	Uncharacterized protein	Candidatus Roizmanbacteria bacterium CG_4_10_14_0_2_um_filter_36_9	1	10.9	3.47e-06	308	47-399 (414)	4-299 (300)
AF-A0A5N3S2N6-F1-model_v4	DMT family transporter	Vibrio fortis	1	12.5	1.68e-05	308	47-404 (414)	4-302 (303)
AF-A0A1I1P1F3-F1-model_v4	O-acetylserine/cysteine efflux transporter	Klenkia taihuensis	1	12.8	6.21e-06	308	51-411 (414)	5-304 (332)
AF-A0A7S0Q8D1-F1-model_v4	Hypothetical protein	Coccolithus braarudii	1	14.8	4e-07	308	1-414 (414)	35-390 (390)
AF-A0A099FCT7-F1-model_v4	EamA domain-containing protein	Paracoccus sphaerophysae	1	9.6	7.34e-06	307	51-403 (414)	3-285 (286)
AF-A0A126V353-F1-model_v4	Multidrug DMT transporter permease	Falsihalocynthiibacter arcticus	1	14.8	1.33e-06	307	31-404 (414)	4-299 (300)
AF-D7BEM4-F1-model_v4	Uncharacterized protein	Meiothermus silvanus DSM 9946	1	15.4	1.71e-06	306	51-399 (414)	5-288 (289)
AF-A0A381QG32-F1-model_v4	Uncharacterized protein	marine metagenome	1	11	1.83e-05	306	51-392 (414)	9-287 (290)
AF-A0A2S5KTY1-F1-model_v4	EamA/RhaT family transporter	Proteobacteria bacterium 228	1	14.9	3.06e-06	306	51-413 (414)	3-292 (297)
AF-A0A3L8NXI8-F1-model_v4	EamA family transporter	Marmoricola mangrovicus	1	14.1	4.65e-06	306	51-394 (414)	5-280 (301)
AF-A0A1M6GTE6-F1-model_v4	Permease of the drug/metabolite transporter (DMT) superfamily	Dethiosulfatibacter aminovorans DSM 17477	1	13.2	1.55e-05	306	47-404 (414)	4-297 (302)
AF-A0A840XKG2-F1-model_v4	O-acetylserine/cysteine efflux transporter	Chryseoglobus frigidaquae	1	13.3	5.05e-06	306	51-393 (414)	5-279 (302)
AF-A0A2V2SM73-F1-model_v4	EamA family transporter	Candidatus Rokubacteria bacterium	1	13.6	3.84e-07	306	22-414 (414)	2-330 (330)
AF-A0A2V9VSH9-F1-model_v4	Uncharacterized protein	Acidobacteria bacterium	1	11.1	7.04e-06	306	14-407 (414)	16-335 (347)
AF-A0A1Y5I0S4-F1-model_v4	Glucose-6-phosphate/phosphate and phosphoenolpyruvate/phosphate antiporter	Ostreococcus tauri	1	10.6	5.58e-07	306	24-414 (414)	1-354 (403)
AF-A0A194S684-F1-model_v4	Uncharacterized protein	Rhodotorula graminis WP1	1	13	2.75e-07	306	50-395 (414)	10-365 (547)
AF-A0A840XI74-F1-model_v4	DME family drug/metabolite transporter	Chryseoglobus frigidaquae	1	13.1	6.48e-06	305	50-413 (414)	3-296 (296)
AF-A0A1R3XLA0-F1-model_v4	Probable blue pigment (Indigoidine) exporter	Microbacterium sp. RU1D	1	13.9	1.11e-05	305	51-413 (414)	7-289 (297)
AF-A0A1H8DZI7-F1-model_v4	Permease of the drug/metabolite transporter (DMT) superfamily	Stigmatella aurantiaca	1	13.2	1.37e-05	305	49-413 (414)	17-308 (312)
AF-A0A066TXE3-F1-model_v4	Multidrug transporter	Amycolatopsis rifamycinica	1	12.6	1.49e-05	305	51-395 (414)	6-287 (322)
AF-A0A3Q9KYV4-F1-model_v4	DMT family transporter	Streptomyces griseoviridis	1	14.6	1.45e-06	305	47-414 (414)	9-325 (330)
AF-A0A3N2FWT9-F1-model_v4	Chloramphenicol-sensitive protein RarD	Rathayibacter sp. PhB127	1	12.8	4.46e-06	305	1-407 (414)	1-330 (332)
AF-A0A291GU35-F1-model_v4	EamA family transporter	Brachybacterium ginsengisoli	1	12.5	5.72e-06	305	51-414 (414)	5-292 (354)
AF-A0A345IK15-F1-model_v4	EamA/RhaT family transporter	Deinococcus wulumuqiensis	1	16.2	1.64e-06	304	48-397 (414)	4-283 (285)
AF-A0A1U9JP94-F1-model_v4	Uncharacterized protein	Aquaspirillum sp. LM1	1	11.2	1.45e-06	304	49-411 (414)	2-306 (306)
AF-A0A5J6N658-F1-model_v4	Uncharacterized protein	Hypericibacter adhaerens	1	12	7.34e-06	304	53-395 (414)	5-287 (315)
AF-A0A543CL31-F1-model_v4	Drug/metabolite transporter (DMT)-like permease	Actinoallomurus bryophytorum	1	12	4.46e-06	304	50-413 (414)	12-303 (337)
AF-V6AR34-F1-model_v4	Putative Uncharacterized transporter MTH_841	Candidatus Nitrosotenuis uzonensis	1	12.3	1.64e-06	304	4-406 (414)	20-352 (353)
AF-G7E9D8-F1-model_v4	TPT domain-containing protein	Mixia osmundae IAM 14324	1	14.1	7.9e-08	304	1-407 (414)	167-535 (682)
AF-A0A521K1E6-F1-model_v4	DMT family transporter	Nitrospirae bacterium	1	12.5	1.26e-05	303	32-394 (414)	1-294 (296)
AF-A0A090M3M3-F1-model_v4	Drug/metabolite transporter	Ostreococcus tauri	1	14.9	1.79e-06	303	53-409 (414)	16-318 (326)
AF-A0A2M6YZZ0-F1-model_v4	Multidrug DMT transporter permease	Ignavibacteriales bacterium CG07_land_8_20_14_0_80_59_12	1	14.9	7.65e-06	303	50-414 (414)	7-309 (328)
AF-I1LFM6-F1-model_v4	TPT domain-containing protein	Glycine max	1	12.2	2.49e-06	303	34-412 (414)	2-315 (345)
AF-G7E505-F1-model_v4	TPT domain-containing protein	Mixia osmundae IAM 14324	1	14.9	7.15e-07	303	1-397 (414)	6-363 (363)
AF-A0A1Y2DP67-F1-model_v4	Uncharacterized protein	Neocallimastix californiae	1	15.5	6.42e-08	303	1-409 (414)	1-365 (373)
AF-A0A835B6W9-F1-model_v4	Uncharacterized protein	Digitaria exilis	1	13.8	9.98e-07	303	3-408 (414)	1-376 (376)
AF-A0A422QXY3-F1-model_v4	EamA/RhaT family transporter	Methylarcula marina	1	11.5	5.86e-05	302	53-401 (414)	2-285 (286)
AF-A0A3D5U8H4-F1-model_v4	Uncharacterized protein	Candidatus Cloacimonas sp.	1	11.9	6.21e-06	302	51-406 (414)	5-294 (295)
AF-A0A849L4B1-F1-model_v4	DMT family transporter	Halovulum dunhuangense	1	14.5	1.21e-05	302	46-410 (414)	9-295 (296)
AF-A0A2G9SRS2-F1-model_v4	Uncharacterized protein	[Chlorobium] sp. 445	1	12.2	4.46e-06	302	49-400 (414)	13-305 (306)
AF-A0A453LAL6-F1-model_v4	Uncharacterized protein	Aegilops tauschii subsp. strangulata	1	12.2	4.84e-06	302	47-414 (414)	12-322 (324)
AF-A0A1I7LA32-F1-model_v4	Permease of the drug/metabolite transporter (DMT) superfamily	Alicyclobacillus macrosporangiidus	1	15.6	3.19e-06	302	42-394 (414)	4-331 (344)
AF-A0A2D0AM56-F1-model_v4	Uncharacterized protein	Roseateles aquatilis	1	13.2	2.94e-06	302	49-414 (414)	3-307 (349)
AF-A0A0V0G906-F1-model_v4	Putative solute carrier family 35 member c2	Triatoma dimidiata	1	11	1.23e-06	302	39-407 (414)	21-341 (395)
AF-A0A1J4MXU3-F1-model_v4	TPT domain-containing protein	Cryptosporidium andersoni	1	14.2	5.58e-07	302	1-400 (414)	1-345 (415)
AF-A0A6B2CEF9-F1-model_v4	EamA family transporter	Thermogladius sp.	1	15.7	1.16e-05	301	50-394 (414)	2-285 (286)
AF-A0A5J6N1Q8-F1-model_v4	Uncharacterized protein	Hypericibacter adhaerens	1	16.6	5.26e-06	301	49-413 (414)	2-302 (302)
AF-Q1N3F1-F1-model_v4	Membrane protein	Bermanella marisrubri	1	11.6	2.82e-06	301	48-414 (414)	5-311 (311)
AF-A0A1Y2EMA1-F1-model_v4	Uncharacterized protein	Neocallimastix californiae	1	11.6	2.2e-06	301	50-409 (414)	2-306 (329)
AF-A0A6B2L7Q2-F1-model_v4	Uncharacterized protein	Arcella intermedia	1	14.3	4.34e-07	301	54-414 (414)	2-354 (372)
AF-A0A7J4IUF2-F1-model_v4	DMT family transporter	Candidatus Woesearchaeota archaeon	1	15.5	1.94e-06	300	47-395 (414)	2-287 (288)
AF-A0A166GKY4-F1-model_v4	Uncharacterized protein	Secundilactobacillus collinoides	1	13.4	3.19e-06	300	48-412 (414)	3-291 (295)
AF-A0A7J4IE23-F1-model_v4	EamA family transporter	Candidatus Woesearchaeota archaeon	1	13.3	6.21e-06	300	50-397 (414)	3-295 (296)
AF-A0A1M6KJR6-F1-model_v4	Permease of the drug/metabolite transporter (DMT) superfamily	Dethiosulfatibacter aminovorans DSM 17477	1	16.2	1.71e-06	300	51-406 (414)	4-298 (299)
AF-A0A317PTN6-F1-model_v4	Drug/metabolite transporter (DMT)-like permease	Hoeflea marina	1	10.4	9.03e-06	300	47-414 (414)	5-301 (302)
AF-A0A2M7S022-F1-model_v4	Uncharacterized protein	Elusimicrobia bacterium CG_4_10_14_0_8_um_filter_37_32	1	12.5	1.37e-05	300	50-408 (414)	7-303 (303)
AF-A0A4Q1KI38-F1-model_v4	DMT family transporter	Sphingobium fluviale	1	13.1	3.06e-06	300	44-414 (414)	13-307 (307)
AF-A0A2T0RBL8-F1-model_v4	Drug/metabolite transporter (DMT)-like permease	Kineococcus rhizosphaerae	1	13.3	3.77e-06	300	47-412 (414)	10-309 (310)
AF-S5SX22-F1-model_v4	Uncharacterized protein	Corynebacterium maris DSM 45190	1	11.5	9.18e-07	300	24-414 (414)	1-362 (392)
AF-A0A1W0WNC7-F1-model_v4	G_PROTEIN_RECEP_F1_2 domain-containing protein	Hypsibius dujardini	1	17.2	2.53e-07	300	1-414 (414)	443-851 (880)
AF-A0A2V9IFM9-F1-model_v4	Uncharacterized protein	Acidobacteria bacterium	1	12.2	7.34e-06	299	47-393 (414)	5-281 (286)
AF-A0A2D8P5R3-F1-model_v4	Uncharacterized protein	Maritimibacter sp.	1	13.3	1.11e-05	299	48-393 (414)	3-285 (288)
AF-A0A1T4VXE6-F1-model_v4	EamA-like transporter family protein	Paradesulfovibrio bizertensis DSM 18034	1	14.4	6.75e-06	299	51-393 (414)	9-290 (304)
AF-A0A5C7M6F4-F1-model_v4	DMT family transporter	Gammaproteobacteria bacterium	1	12.2	6.48e-06	299	47-394 (414)	11-291 (306)
AF-A0A5J6MVR7-F1-model_v4	Membrane protein	Hypericibacter adhaerens	1	11.8	1.37e-05	299	46-394 (414)	20-305 (306)
AF-A0A2M6YV70-F1-model_v4	EamA/RhaT family transporter	Candidatus Roizmanbacteria bacterium CG07_land_8_20_14_0_80_34_15	1	18.5	8.11e-07	298	45-399 (414)	3-298 (299)
AF-A0A087SEJ4-F1-model_v4	GDP-mannose transporter GONST1	Auxenochlorella protothecoides	1	11.5	5.49e-06	298	5-399 (414)	1-345 (355)
AF-A0A2D5IJF1-F1-model_v4	Protein RarD	Marinovum sp.	1	12.8	9.82e-06	297	47-403 (414)	3-291 (293)
AF-Q1N638-F1-model_v4	Membrane protein	Bermanella marisrubri	1	12.2	1.16e-05	297	53-403 (414)	5-292 (294)
AF-A0A0W0XS22-F1-model_v4	Transmembrane protein	Legionella rubrilucens	1	14.1	7.77e-07	297	49-392 (414)	5-289 (294)
AF-A0A5P8NZR0-F1-model_v4	DMT family transporter	Sulfurimonas lithotrophica	1	13.4	3.77e-06	297	34-394 (414)	2-290 (295)
AF-A0A1I1N1M5-F1-model_v4	Chloramphenicol-sensitive protein RarD	Klenkia taihuensis	1	11.6	5.96e-06	297	47-414 (414)	3-303 (304)
AF-A0A194SBC3-F1-model_v4	TPT domain-containing protein	Rhodotorula graminis WP1	1	13.1	4.17e-07	297	1-407 (414)	74-454 (505)
AF-A0A2J6XTH6-F1-model_v4	EamA family transporter	Dictyoglomus sp. NZ13-RE01	1	14.4	2.94e-06	296	51-401 (414)	5-282 (283)
AF-A0A849WG02-F1-model_v4	DMT family transporter	Candidatus Brocadiae bacterium	1	13.9	1.49e-05	296	49-393 (414)	8-291 (309)
AF-A0A0A2E5G7-F1-model_v4	Uncharacterized protein	Porphyromonas macacae	1	14.8	1.13e-06	296	47-393 (414)	2-296 (312)
AF-A0A2V7YM82-F1-model_v4	Multidrug DMT transporter permease	Acidobacteria bacterium	1	11.7	2.89e-05	296	47-414 (414)	4-298 (312)
AF-A0A292EG44-F1-model_v4	Uncharacterized protein	Rhizobium sp. ACO-34A	1	12.3	4.27e-06	296	1-398 (414)	15-345 (346)
AF-A0A4D8Y2X7-F1-model_v4	Probable purine permease	Salvia splendens	1	11.6	1.45e-06	296	16-414 (414)	34-389 (403)
AF-A0A067LFF8-F1-model_v4	Uncharacterized protein	Jatropha curcas	1	15.7	8.95e-08	296	1-394 (414)	86-453 (470)
AF-A0A5C7MCJ4-F1-model_v4	DMT family transporter	Gammaproteobacteria bacterium	1	15.2	1.64e-06	295	50-394 (414)	9-288 (295)
AF-A0A2M7GQC5-F1-model_v4	EamA/RhaT family transporter	Rhodobacterales bacterium CG15_BIG_FIL_POST_REV_8_21_14_020_59_13	1	15.5	1.49e-05	295	51-393 (414)	11-290 (300)
AF-A0A4R6VVW1-F1-model_v4	Drug/metabolite transporter (DMT)-like permease	Maritalea mobilis	1	16.1	1.33e-06	295	47-414 (414)	11-305 (305)
AF-A0A094Q4H8-F1-model_v4	Uncharacterized protein	freshwater metagenome	1	10.6	2.94e-06	295	22-414 (414)	8-336 (336)
AF-A0A536PQ91-F1-model_v4	EamA family transporter	Chloroflexi bacterium	1	14.2	7.65e-06	295	51-407 (414)	7-313 (344)
AF-A0A6B2L662-F1-model_v4	Uncharacterized protein	Arcella intermedia	1	15.4	3.53e-07	295	33-414 (414)	22-391 (398)
AF-A0A2C6DL99-F1-model_v4	EamA/RhaT family transporter	Budvicia aquatica	1	14.1	1.49e-05	294	48-397 (414)	3-282 (283)
AF-A0A849L5P8-F1-model_v4	DMT family transporter	Halovulum dunhuangense	1	9.4	2.66e-05	294	56-414 (414)	2-287 (287)
AF-A0A849WCZ2-F1-model_v4	EamA family transporter	Candidatus Brocadiae bacterium	1	14	3.19e-06	294	51-395 (414)	5-283 (289)
AF-D7BHW8-F1-model_v4	Uncharacterized protein	Meiothermus silvanus DSM 9946	1	12.8	7.34e-06	294	50-401 (414)	6-295 (295)
AF-A0A1M5AZ20-F1-model_v4	EamA domain-containing membrane protein RarD	Streptoalloteichus hindustanus	1	10.5	2.66e-05	294	53-414 (414)	2-298 (316)
AF-A0A2N0VLN0-F1-model_v4	EamA family transporter	Rhodohalobacter barkolensis	1	15.5	1.58e-06	294	26-393 (414)	1-308 (318)
AF-A0A6B1CPZ9-F1-model_v4	DMT family transporter	Gemmatimonadetes bacterium	1	11.2	7.65e-06	294	49-414 (414)	2-329 (334)
AF-A0A359F991-F1-model_v4	EamA family transporter	Propionibacteriaceae bacterium	1	10.1	4.65e-06	294	1-406 (414)	34-369 (370)
AF-A0A4D8YQ66-F1-model_v4	TPT domain-containing protein	Salvia splendens	1	13	2.53e-07	294	1-414 (414)	1-398 (411)
AF-A0A256J368-F1-model_v4	EamA family transporter	Halorubrum ezzemoulense	1	12.7	2.25e-05	293	51-400 (414)	6-295 (296)
AF-A0A1B7L347-F1-model_v4	Uncharacterized protein	Mangrovibacter phragmitis	1	14.8	3.93e-06	293	28-394 (414)	2-298 (301)
AF-A0A1U9JRC5-F1-model_v4	Uncharacterized protein	Aquaspirillum sp. LM1	1	11.6	2.89e-05	293	26-398 (414)	1-303 (304)
AF-A0A842TQ74-F1-model_v4	EamA family transporter	Candidatus Lokiarchaeota archaeon	1	9.4	3.14e-05	293	51-401 (414)	8-304 (306)
AF-A0A1H2BNU3-F1-model_v4	Permease of the drug/metabolite transporter (DMT) superfamily	Mucilaginibacter mallensis	1	14.1	4.84e-06	293	49-414 (414)	11-330 (339)
AF-A0A0D2BTI2-F1-model_v4	Uncharacterized protein	Cladophialophora immunda	1	10.5	1.04e-06	293	47-394 (414)	16-336 (357)
AF-A0A1W0X2U2-F1-model_v4	Peptidase M12A domain-containing protein	Hypsibius dujardini	1	14.5	1.18e-06	293	26-394 (414)	1-337 (933)
AF-A0A2T0R068-F1-model_v4	Drug/metabolite transporter (DMT)-like permease	Kineococcus rhizosphaerae	1	13.2	3.28e-05	292	51-394 (414)	5-285 (307)
AF-A0A1H7AF28-F1-model_v4	Permease of the drug/metabolite transporter (DMT) superfamily	Demequina mangrovi	1	15.2	2.07e-05	292	52-414 (414)	17-313 (323)
AF-A0A2P8E2M5-F1-model_v4	Drug/metabolite transporter (DMT)-like permease	Haloactinopolyspora alba	1	14	1.43e-05	292	28-394 (414)	1-294 (338)
AF-A0A090M294-F1-model_v4	Solute carrier family 35 member SLC35F1/F2/F6	Ostreococcus tauri	1	14	2.2e-06	292	34-395 (414)	14-328 (386)
AF-A0A1W0WKV6-F1-model_v4	Solute carrier family 35 member F1	Hypsibius dujardini	1	15	2.6e-06	292	1-393 (414)	1-340 (389)
AF-A0A497XDN7-F1-model_v4	Drug/metabolite transporter (DMT)-like permease	Sulfurisoma sediminicola	1	14.6	5.72e-06	291	51-392 (414)	7-288 (292)
AF-A0A2S5KIZ0-F1-model_v4	EamA family transporter	Proteobacteria bacterium 228	1	13.7	3.62e-06	291	47-392 (414)	3-289 (293)
AF-A0A6P3Q8L2-F1-model_v4	transmembrane protein 241	Pteropus vampyrus	1	10.9	9.82e-06	291	45-400 (414)	3-300 (301)
AF-A0A536PRV1-F1-model_v4	DMT family transporter	Chloroflexi bacterium	1	14.5	2.82e-06	291	16-414 (414)	11-332 (332)
AF-A0A2V7Z287-F1-model_v4	Uncharacterized protein	Acidobacteria bacterium	1	15.3	6.75e-06	290	54-393 (414)	3-276 (288)
AF-A0A345ZBI6-F1-model_v4	Uncharacterized protein	Candidatus Chromulinivorax destructor	1	12.9	1.16e-05	290	53-400 (414)	2-298 (299)
AF-A0A371NYX3-F1-model_v4	EamA family transporter	Aeromicrobium endophyticum	1	13.2	1.16e-05	290	51-393 (414)	5-279 (311)
AF-A0A849ZSF4-F1-model_v4	DMT family transporter	Candidatus Sumerlaeia bacterium	1	17.3	1.23e-06	290	44-404 (414)	18-324 (324)
AF-A0A3C1FF31-F1-model_v4	Uncharacterized protein	Propionibacteriaceae bacterium	1	12	1.39e-06	289	1-394 (414)	2-321 (334)
AF-A0A842VTK4-F1-model_v4	EamA family transporter	Candidatus Lokiarchaeota archaeon	1	12.6	9.98e-07	289	35-407 (414)	2-334 (336)
AF-A0A444PQV2-F1-model_v4	DMT family transporter	Labedella phragmitis	1	14.7	1.58e-06	289	1-394 (414)	15-358 (378)
AF-A0A356SF03-F1-model_v4	Uncharacterized protein	Halieaceae bacterium	1	13.8	1.26e-05	288	78-403 (414)	4-265 (268)
AF-A0A839UU45-F1-model_v4	Drug/metabolite transporter (DMT)-like permease	Simiduia aestuariiviva	1	12.8	4.97e-05	288	48-397 (414)	4-279 (291)
AF-A0A4V3DMV8-F1-model_v4	Chloramphenicol-sensitive protein RarD	Pseudomonas brenneri	1	10.6	1.83e-05	288	40-412 (414)	2-298 (298)
AF-A0A2N3I2U1-F1-model_v4	EamA-like transporter family	Raineya orbicola	1	11.3	1.33e-06	288	22-394 (414)	3-319 (322)
AF-A0A2D7LDJ1-F1-model_v4	EamA domain-containing protein	Marinovum sp.	1	12.5	2.16e-05	288	47-413 (414)	5-317 (327)
AF-A0A6P4J0U0-F1-model_v4	adenosine 3'-phospho 5'-phosphosulfate transporter 2-like	Drosophila kikkawai	1	15.3	3.47e-06	288	44-414 (414)	25-358 (364)
AF-A0A1J4MQC7-F1-model_v4	Uncharacterized protein	Cryptosporidium andersoni	1	13.5	3.39e-07	288	32-407 (414)	1-430 (1001)
AF-A0A354BAP3-F1-model_v4	EamA family transporter	Acidimicrobiaceae bacterium	1	10.8	2.07e-05	287	51-395 (414)	2-278 (278)
AF-A0A7C4HE75-F1-model_v4	DMT family transporter	Staphylothermus marinus	1	13.1	1.68e-05	287	50-392 (414)	6-283 (288)
AF-A0A5D8QB33-F1-model_v4	DMT family transporter	Calorimonas adulescens	1	13	3.93e-06	287	51-393 (414)	7-278 (298)
AF-A0A1Z4SSR3-F1-model_v4	Uncharacterized protein	Calothrix sp. NIES-4105	1	12.8	3.77e-06	287	1-393 (414)	1-317 (324)
AF-A0A534I9G0-F1-model_v4	DMT family transporter	Gammaproteobacteria bacterium	1	14.1	2.29e-06	287	1-414 (414)	3-314 (421)
AF-A0A6J7J7I8-F1-model_v4	Unannotated protein	freshwater metagenome	1	14.1	1.02e-05	286	50-394 (414)	2-280 (282)
AF-A0A087SU17-F1-model_v4	Putative transporter	Auxenochlorella protothecoides	1	14.4	2.45e-05	286	68-401 (414)	2-288 (289)
AF-A0A1M6CEI9-F1-model_v4	Threonine/homoserine efflux transporter RhtA	Dethiosulfatibacter aminovorans DSM 17477	1	13.5	4.46e-06	286	47-408 (414)	2-301 (301)
AF-A0A0M8Z1G4-F1-model_v4	Membrane protein	Streptomyces sp. NRRL F-7442	1	14.4	1.26e-05	286	55-394 (414)	2-286 (314)
AF-A0A1I4E639-F1-model_v4	Threonine/homoserine efflux transporter RhtA	Mesorhizobium albiziae	1	12.5	1.37e-05	286	22-398 (414)	6-314 (315)
AF-A0A3P6H468-F1-model_v4	EamA domain-containing protein	Brassica oleracea	1	13.4	8.45e-07	286	26-414 (414)	34-392 (418)
AF-A0A832E1Y2-F1-model_v4	DMT family transporter	Calditrichia bacterium	1	17	3.42e-05	285	49-374 (414)	10-272 (274)
AF-A0A534A8Y3-F1-model_v4	Drug/metabolite exporter YedA	Gammaproteobacteria bacterium	1	12.5	5.26e-06	285	13-395 (414)	2-296 (301)
AF-A0A3D1DQM1-F1-model_v4	EamA/RhaT family transporter	Planctomycetaceae bacterium	1	14.6	7.04e-06	285	48-414 (414)	13-298 (312)
AF-A0A117S4R1-F1-model_v4	Uncharacterized protein	Desulfitibacter sp. BRH_c19	1	13	8.31e-06	285	50-394 (414)	12-293 (312)
AF-A0A2U8DZI0-F1-model_v4	Uncharacterized protein	Ereboglobus luteus	1	10.5	7.65e-06	285	2-401 (414)	28-371 (372)
AF-A0A4Y2L5D4-F1-model_v4	Solute carrier family 35 member G1	Araneus ventricosus	1	17.2	1.45e-06	285	22-414 (414)	5-332 (373)
AF-C1L3N5-F1-model_v4	Solute carrier family 35 member F1	Schistosoma japonicum	1	14.3	1.82e-07	285	45-395 (414)	15-388 (404)
AF-A0A1Y5I8I8-F1-model_v4	Uncharacterized protein	Ostreococcus tauri	1	15.5	8.11e-07	285	1-414 (414)	50-424 (542)
AF-A0A107FLB8-F1-model_v4	Uncharacterized protein	Burkholderia ubonensis	1	13.9	2.35e-05	284	81-404 (414)	3-271 (271)
AF-A0A7Y2EXL9-F1-model_v4	DMT family transporter	Flavobacteriales bacterium	1	15.4	5.26e-06	284	54-394 (414)	2-284 (288)
AF-A0A5C5WWT4-F1-model_v4	EamA-like transporter family protein	Rubripirellula amarantea	1	12.5	1.76e-05	284	51-395 (414)	3-298 (299)
AF-A0A0P8BXK7-F1-model_v4	DMT superfamily drug/metabolite transporter	Rhodobacteraceae bacterium HLUCCA09	1	9.5	1.49e-05	284	22-414 (414)	1-307 (309)
AF-A0A0V1BAS7-F1-model_v4	Solute carrier family 35 member C2	Trichinella spiralis	1	11.5	4.84e-06	284	44-413 (414)	39-355 (385)
AF-A0A843D9R5-F1-model_v4	DMT family transporter	Methanocorpusculaceae archaeon	1	11	2.07e-05	283	48-394 (414)	2-284 (289)
AF-A0A1T4W5G1-F1-model_v4	Chloramphenicol-sensitive protein RarD	Paradesulfovibrio bizertensis DSM 18034	1	10.6	1.43e-05	283	50-407 (414)	11-300 (309)
AF-A0A1H6XZF6-F1-model_v4	Threonine/homoserine efflux transporter RhtA	Demequina mangrovi	1	11.3	3.87e-05	283	37-395 (414)	2-306 (356)
AF-A0A6N7ZZL5-F1-model_v4	DMT family transporter	Roseibium sp. RKSG952	1	13.5	2.45e-05	282	58-398 (414)	2-261 (262)
AF-A0A7Y5QTU6-F1-model_v4	Uncharacterized protein	Flavobacteriales bacterium	1	14.6	5.86e-05	282	53-395 (414)	2-281 (282)
AF-A0A2V8RE51-F1-model_v4	Uncharacterized protein	Acidobacteria bacterium	1	13.8	2.55e-05	282	49-414 (414)	4-314 (315)
AF-A0A440KC36-F1-model_v4	DMT family transporter	Mesorhizobium sp.	1	13.4	6.48e-06	282	32-399 (414)	13-340 (341)
AF-A0A1W0WNB0-F1-model_v4	Putative Solute carrier family 35 member F4	Hypsibius dujardini	1	17	8.95e-08	282	1-409 (414)	26-415 (433)
AF-A0A167NMD8-F1-model_v4	Uncharacterized protein	Calocera viscosa TUFC12733	1	12.1	1.71e-06	282	53-414 (414)	20-403 (556)
AF-A0A1R0LLT9-F1-model_v4	Uncharacterized protein	Streptomyces sp. IMTB 2501	1	12.6	2.25e-05	281	51-414 (414)	2-305 (311)
AF-A0A1I7JVF1-F1-model_v4	Permease of the drug/metabolite transporter (DMT) superfamily	Alicyclobacillus macrosporangiidus	1	14.5	2.82e-06	281	25-393 (414)	1-302 (322)
AF-A0A3D0FN90-F1-model_v4	EamA family transporter	Bacteroidales bacterium	1	12.5	2.66e-05	280	47-395 (414)	2-296 (298)
AF-A0A1V4E5C7-F1-model_v4	EamA family transporter	Streptomyces sp. GKU 895	1	15.6	5.72e-06	280	47-413 (414)	6-301 (325)
AF-A0A1W0WNH0-F1-model_v4	EamA domain-containing protein	Hypsibius dujardini	1	16.4	6.98e-08	280	1-414 (414)	29-444 (471)
AF-A0A2N3I9W4-F1-model_v4	EamA-like transporter family	Raineya orbicola	1	11	4.2e-05	279	47-393 (414)	3-285 (289)
AF-A0A496LIH8-F1-model_v4	DMT family transporter	Campylobacter sp.	1	12.6	7.04e-06	279	46-407 (414)	4-295 (297)
AF-A0A6N8A4Y8-F1-model_v4	EamA family transporter RarD	Roseibium sp. RKSG952	1	12.4	3.14e-05	279	47-414 (414)	11-306 (308)
AF-A0A0M0KDH8-F1-model_v4	Uncharacterized protein	Halalkalibacterium halodurans	1	14.8	7.04e-06	279	47-414 (414)	3-311 (311)
AF-A0A7S1IEU1-F1-model_v4	Hypothetical protein	Eutreptiella gymnastica	1	11.8	7.04e-06	279	24-414 (414)	1-326 (348)
AF-A0A3P6GEX2-F1-model_v4	EamA domain-containing protein	Brassica oleracea	1	13.5	1.33e-06	279	37-412 (414)	2-347 (470)
AF-A0A1R4A5Y3-F1-model_v4	DME family DMT superfamily transporter	Cuniculiplasma divulgatum	1	11.6	1.91e-05	278	46-395 (414)	2-278 (280)
AF-A0A1F8BMT4-F1-model_v4	Uncharacterized protein	Candidatus Woesebacteria bacterium RIFCSPLOWO2_01_FULL_39_25	1	11.9	1.83e-05	278	53-394 (414)	2-282 (283)
AF-A0A0P9QVJ7-F1-model_v4	Uncharacterized protein	Pseudomonas amygdali pv. eriobotryae	1	17.5	1.02e-05	278	51-414 (414)	4-294 (296)
AF-A0A2V9W7Y3-F1-model_v4	EamA family transporter	Acidobacteria bacterium	1	14.2	4.46e-06	278	40-395 (414)	4-295 (299)
AF-A0A2T2RYK1-F1-model_v4	EamA family transporter	Cyanobacteria bacterium QS_8_64_29	1	16.4	6.21e-06	278	47-393 (414)	2-295 (299)
AF-A0A254NMV2-F1-model_v4	EamA family transporter	Saccharibacillus sp. O23	1	13.9	3.62e-06	278	47-414 (414)	5-319 (336)
AF-A0A5J6MY82-F1-model_v4	Uncharacterized protein	Hypericibacter adhaerens	1	11.1	1.21e-05	278	22-397 (414)	2-333 (340)
AF-A0A1H3F7G0-F1-model_v4	Threonine/homoserine efflux transporter RhtA	Eubacterium barkeri	1	17.1	6.21e-06	277	49-397 (414)	3-290 (299)
AF-A0A3M1V2K1-F1-model_v4	DMT family transporter	Euryarchaeota archaeon	1	14.9	5.72e-06	277	52-393 (414)	7-296 (299)
AF-A0A4R8MBU7-F1-model_v4	Putative membrane protein	Aminivibrio pyruvatiphilus	1	15.7	2.71e-06	277	48-394 (414)	2-300 (301)
AF-A0A2V8HE24-F1-model_v4	Uncharacterized protein	Acidobacteria bacterium	1	14.2	3.77e-06	277	53-395 (414)	15-304 (314)
AF-A0A1Y5IDQ5-F1-model_v4	UAA transporter	Ostreococcus tauri	1	11.6	2.78e-05	277	3-407 (414)	1-344 (346)
AF-A0A2W4S4P8-F1-model_v4	Uncharacterized protein	bacterium	1	13.1	6.48e-06	277	49-414 (414)	13-329 (358)
AF-A0A7V1Q253-F1-model_v4	DMT family transporter	Phycisphaerales bacterium	1	12.9	1.28e-06	277	1-414 (414)	12-381 (413)
AF-A0A6B3IA99-F1-model_v4	DMT family transporter	Streptomyces sp. SID8455	1	15	6.37e-05	276	61-400 (414)	2-279 (280)
AF-A0A150H257-F1-model_v4	TPT domain-containing protein	Gonium pectorale	1	13.5	2.66e-05	276	68-408 (414)	2-285 (285)
AF-A0A1R1AA04-F1-model_v4	Uncharacterized protein	Paenibacillus sp. FSL A5-0031	1	10.8	1.83e-05	276	51-394 (414)	2-296 (297)
AF-G6YDW1-F1-model_v4	Uncharacterized protein	Mesorhizobium amorphae CCNWGS0123	1	12	7.97e-06	276	48-413 (414)	3-298 (302)
AF-A0A7C3YM16-F1-model_v4	Uncharacterized protein	Candidatus Poribacteria bacterium	1	15.5	4.1e-06	276	52-394 (414)	17-295 (304)
AF-A0A545SSR4-F1-model_v4	DMT family transporter	Exilibacterium tricleocarpae	1	11.9	2.16e-05	276	51-414 (414)	12-295 (306)
AF-A0A6V8MQ00-F1-model_v4	Membrane protein	Geomonas paludis	1	16.1	3.06e-06	276	51-394 (414)	8-299 (332)
AF-A0A3P7WJL9-F1-model_v4	Uncharacterized protein	Heligmosomoides polygyrus	1	13.4	1.07e-05	276	55-395 (414)	2-285 (340)
AF-A0A2K9DV45-F1-model_v4	EamA family transporter	Microbacterium hominis	1	12.8	1.91e-05	276	55-403 (414)	2-294 (349)
AF-I1JDE8-F1-model_v4	WAT1-related protein	Glycine max	1	12.4	1.21e-05	276	32-407 (414)	1-356 (361)
AF-A0A835AVY7-F1-model_v4	Uncharacterized protein	Digitaria exilis	1	11.8	9.03e-06	276	28-414 (414)	2-353 (377)
AF-G7E8X5-F1-model_v4	Uncharacterized protein	Mixia osmundae IAM 14324	1	12.5	4.6e-08	276	1-414 (414)	130-668 (672)
AF-A0A6N7ZVA3-F1-model_v4	DMT family transporter	Roseibium sp. RKSG952	1	15.8	1.11e-05	275	47-393 (414)	11-294 (304)
AF-A0A1B2DBU3-F1-model_v4	Multidrug transporter	Paenibacillus sp. BIHB4019	1	12	4.65e-06	275	32-413 (414)	1-329 (329)
AF-A0A509MQI4-F1-model_v4	FAD-dependent oxidoreductase	Marinobacter halodurans	1	12.3	5.72e-06	275	18-395 (414)	49-347 (355)
AF-A0A432T4K4-F1-model_v4	EamA family transporter	Sulfurovum sp.	1	15.2	5.72e-06	274	51-394 (414)	3-287 (292)
AF-U3A3M5-F1-model_v4	EamA domain-containing protein	Vibrio proteolyticus NBRC 13287	1	12.8	2.16e-05	274	49-393 (414)	2-288 (306)
AF-A0A0N0TX30-F1-model_v4	Membrane protein	Streptomyces sp. NRRL F-7442	1	13.4	2.29e-06	274	3-414 (414)	1-333 (392)
AF-G7DYA7-F1-model_v4	EamA domain-containing protein	Mixia osmundae IAM 14324	1	13.6	4.1e-06	274	1-413 (414)	65-431 (472)
AF-A0A6N8A4T7-F1-model_v4	Uncharacterized protein	Roseibium sp. RKSG952	1	14.8	4.65e-06	274	31-407 (414)	1-315 (499)
AF-W8I3X6-F1-model_v4	Uncharacterized protein	Ensifer adhaerens OV14	1	13.4	8.89e-05	273	48-394 (414)	4-288 (293)
AF-A0A3M1U9R1-F1-model_v4	DMT family transporter	Euryarchaeota archaeon	1	13.9	7.04e-06	273	46-394 (414)	2-296 (297)
AF-A0A536PN32-F1-model_v4	EamA family transporter	Chloroflexi bacterium	1	13.1	1.31e-05	273	53-393 (414)	18-297 (307)
AF-A0A1J4MVP5-F1-model_v4	TPT domain-containing protein	Cryptosporidium andersoni	1	13.3	5.35e-07	273	44-414 (414)	18-368 (394)
AF-A0A8B4G2N4-F1-model_v4	Putative DMT superfamily transporter inner membrane protein	Eikenella corrodens	1	17	4.38e-05	272	167-414 (414)	31-267 (267)
AF-A0A7D7SGT6-F1-model_v4	DMT family transporter	Neisseria shayeganii	1	12.2	1.07e-05	272	51-393 (414)	2-284 (292)
AF-M5PTK4-F1-model_v4	Putative permease, DMT superfamily	Desulfocurvibacter africanus PCS	1	14.9	2.02e-06	272	50-411 (414)	3-298 (298)
AF-A0A7C3UMY9-F1-model_v4	DMT family transporter	Candidatus Poribacteria bacterium	1	13.6	2.2e-06	272	46-393 (414)	13-302 (308)
AF-A0A6C0BLB3-F1-model_v4	Uncharacterized protein	viral metagenome	1	11.7	2.45e-05	272	47-413 (414)	7-326 (348)
AF-A0A835BM37-F1-model_v4	Uncharacterized protein	Digitaria exilis	1	11.2	7.46e-07	272	1-407 (414)	184-562 (1136)
AF-A0A545TLG2-F1-model_v4	DMT family transporter	Exilibacterium tricleocarpae	1	14.3	9.03e-06	271	53-398 (414)	2-289 (290)
AF-A0A7J4B9T7-F1-model_v4	DMT family transporter	Desulfurococcaceae archaeon	1	13.7	3.02e-05	271	49-393 (414)	4-287 (291)
AF-A0A094S601-F1-model_v4	Protein rarD	freshwater metagenome	1	11.8	3.02e-05	271	47-411 (414)	3-302 (302)
AF-A0A4R4PMC6-F1-model_v4	Uncharacterized protein	Streptomyces sp. 8K308	1	12.5	2.35e-05	271	53-413 (414)	5-291 (317)
AF-A0A4U0XZF2-F1-model_v4	Uncharacterized protein	Friedmanniomyces simplex	1	15.2	3.53e-07	271	1-413 (414)	7-399 (433)
AF-A0A7V2SJ31-F1-model_v4	DMT family transporter	Nitratifractor salsuginis	1	15.8	1.26e-05	270	56-393 (414)	2-275 (280)
AF-A0A849L664-F1-model_v4	DMT family transporter	Halovulum dunhuangense	1	13.8	2.78e-05	270	56-401 (414)	2-283 (284)
AF-A0A1G9T3K7-F1-model_v4	Uncharacterized membrane protein	Halogranum gelatinilyticum	1	12.4	2.16e-05	270	21-401 (414)	3-325 (326)
AF-I1JJL2-F1-model_v4	TPT domain-containing protein	Glycine max	1	16	1.11e-05	270	33-414 (414)	44-357 (376)
AF-S7TKM8-F1-model_v4	Uncharacterized protein	Desulfovibrio sp. X2	1	16.6	5.05e-06	269	49-408 (414)	2-297 (297)
AF-A0A1H8W8B9-F1-model_v4	Uncharacterized membrane protein	Rhodopseudomonas pseudopalustris	1	12.9	3.47e-06	269	1-414 (414)	2-339 (341)
AF-A0A7Y0JBL3-F1-model_v4	EamA family transporter	Streptomyces sp. GMY02	1	14.7	5.96e-06	269	1-394 (414)	94-421 (425)
AF-A0A1F6PNT0-F1-model_v4	Uncharacterized protein	Candidatus Margulisbacteria bacterium GWD2_39_127	1	13.4	1.26e-05	268	47-394 (414)	3-284 (291)
AF-A0A2A5W9M1-F1-model_v4	Uncharacterized protein	Candidatus Thioglobus sp. MED-G23	1	12.5	1.11e-05	268	47-408 (414)	3-292 (292)
AF-A0A1J0AGV4-F1-model_v4	Permeases of the drug/metabolite transporter (DMT) superfamily	Gloeomargarita lithophora Alchichica-D10	1	14.8	3.28e-05	268	51-393 (414)	5-291 (294)
AF-A0A415EJV7-F1-model_v4	DMT family transporter	Acidaminococcus sp. AM05-11	1	11.9	4.2e-05	268	48-394 (414)	3-282 (297)
AF-A0A7W4F8E8-F1-model_v4	DMT family transporter	Serratia sp. OS31	1	15.8	2.45e-05	268	52-410 (414)	12-306 (307)
AF-A0A4Q1KLC2-F1-model_v4	DMT family transporter	Sphingobium fluviale	1	12.2	3.02e-05	268	26-394 (414)	1-295 (310)
AF-A0A1Y5HYJ9-F1-model_v4	Putative phosphate/phosphoenolpyru	Ostreococcus tauri	1	12.3	1.71e-06	268	6-412 (414)	8-396 (399)
AF-A0A345ZA65-F1-model_v4	Uncharacterized protein	Candidatus Chromulinivorax destructor	1	11.5	1.83e-05	267	53-396 (414)	2-294 (295)
AF-A0A7W5RJR3-F1-model_v4	Drug/metabolite transporter (DMT)-like permease	Rhizobium sp. BK393	1	12	2.45e-05	267	44-412 (414)	3-301 (302)
AF-A0A2V9PHE7-F1-model_v4	Uncharacterized protein	Acidobacteria bacterium	1	13.8	5.49e-06	267	10-393 (414)	2-311 (337)
AF-A0A538QXY8-F1-model_v4	DMT family transporter	Candidatus Rokubacteria bacterium	1	13.8	9.82e-06	267	47-392 (414)	4-290 (383)
AF-A0A6H5JQE9-F1-model_v4	Uncharacterized protein	Ectocarpus sp. CCAP 1310/34	1	13.3	1.07e-05	267	47-394 (414)	13-344 (429)
AF-A0A0D0DQ97-F1-model_v4	Unplaced genomic scaffold scaffold_284, whole genome shotgun sequence	Paxillus rubicundulus Ve08.2h10	1	13.1	2.82e-06	267	1-408 (414)	170-532 (532)
AF-A0A117S4H6-F1-model_v4	Uncharacterized protein	Desulfitibacter sp. BRH_c19	1	14.6	4.2e-05	266	58-407 (414)	2-282 (287)
AF-A0A6J1U5N4-F1-model_v4	transmembrane protein 241 isoform X2	Notechis scutatus	1	11.5	0.000124	266	53-400 (414)	7-294 (295)
AF-A0A1Y2DMD6-F1-model_v4	TPT-domain-containing protein	Neocallimastix californiae	1	17.2	1.21e-05	266	48-399 (414)	2-299 (300)
AF-A0A524HK37-F1-model_v4	DMT family transporter	Candidatus Brocadiae bacterium	1	16.3	6.75e-06	266	50-395 (414)	13-299 (312)
AF-A0A5C6E7Y7-F1-model_v4	EamA-like transporter family protein	Novipirellula aureliae	1	12.4	8.31e-06	266	50-414 (414)	20-360 (390)
AF-A0A087SP66-F1-model_v4	Putative sugar phosphate/phosphate translocator	Auxenochlorella protothecoides	1	14.7	7.04e-06	265	31-403 (414)	2-315 (370)
AF-A0A840XLU0-F1-model_v4	Drug/metabolite transporter (DMT)-like permease	Chryseoglobus frigidaquae	1	12.6	0.000119	264	51-395 (414)	2-283 (283)
AF-A0A2H0QBY2-F1-model_v4	Uncharacterized protein	Alphaproteobacteria bacterium CG11_big_fil_rev_8_21_14_0_20_44_7	1	13.7	9.42e-06	264	44-404 (414)	3-291 (291)
AF-A0A839UR79-F1-model_v4	Drug/metabolite transporter (DMT)-like permease	Simiduia aestuariiviva	1	13.9	9.03e-06	264	48-414 (414)	6-319 (330)
AF-A0A3P9AFS2-F1-model_v4	Solute carrier family 35 member E4	Esox lucius	1	15	2.49e-06	264	28-410 (414)	8-336 (372)
AF-A0A0C9ZZG1-F1-model_v4	Unplaced genomic scaffold scaffold_11, whole genome shotgun sequence	Pisolithus microcarpus 441	1	12.4	1.83e-05	264	20-394 (414)	2-328 (375)
AF-G7EA66-F1-model_v4	Uncharacterized protein	Mixia osmundae IAM 14324	1	11.8	3.19e-06	264	1-393 (414)	59-402 (435)
AF-A0A6G1BNU2-F1-model_v4	TPT domain-containing protein	Oryza meyeriana var. granulata	1	11.6	4.46e-06	264	1-394 (414)	54-409 (443)
AF-A0A3Q3GD21-F1-model_v4	Solute carrier family 35 member F1	Labrus bergylta	1	13.4	2.2e-06	264	17-408 (414)	86-431 (467)
AF-A0A369HAV2-F1-model_v4	DNA helicase	Ophiocordyceps camponoti-saundersi (nom. inval.)	1	12.8	1.26e-05	264	1-397 (414)	39-397 (921)
AF-A0A7S1IF35-F1-model_v4	Hypothetical protein	Eutreptiella gymnastica	1	16.9	5.18e-05	263	162-407 (414)	24-263 (301)
AF-A0A1X0U8J4-F1-model_v4	Uncharacterized protein	Rhodococcus sp. 1163	1	14	6.11e-05	263	51-414 (414)	6-299 (301)
AF-A0A1G3JUC1-F1-model_v4	Uncharacterized protein	Sphingomonadales bacterium RIFCSPHIGHO2_01_FULL_65_20	1	13.6	1.37e-05	263	47-396 (414)	14-309 (312)
AF-A0A2G9STU3-F1-model_v4	Uncharacterized protein	[Chlorobium] sp. 445	1	14.6	2.89e-05	263	31-396 (414)	1-309 (313)
AF-A0A1V5ZX40-F1-model_v4	EamA-like transporter family protein	Synergistetes bacterium ADurb.Bin155	1	12.3	6.64e-05	263	46-407 (414)	9-302 (313)
AF-A0A7U3UPF7-F1-model_v4	Putative integral membrane protein	Streptomyces sp. SN-593	1	13.4	0.000109	263	46-393 (414)	2-277 (318)
AF-A0A6H5JJG5-F1-model_v4	DMT protein	Ectocarpus sp. CCAP 1310/34	1	14.3	2.29e-06	263	1-414 (414)	61-474 (500)
AF-A0A0A8B5P7-F1-model_v4	Uncharacterized protein	Berryella intestinalis	1	11.6	8.52e-05	261	49-400 (414)	2-283 (289)
AF-A0A519ZJ88-F1-model_v4	DMT family transporter	Rubrivivax sp.	1	12.7	2.35e-05	261	51-400 (414)	3-296 (297)
AF-A0A2W2E915-F1-model_v4	Multidrug DMT transporter permease	Nonomuraea aridisoli	1	13.7	2.16e-05	261	41-394 (414)	5-304 (329)
AF-A0A3C1PKY5-F1-model_v4	EamA family transporter	Bacteroidales bacterium	1	14.7	6.48e-06	261	51-407 (414)	44-339 (351)
AF-G7DVF2-F1-model_v4	TPT domain-containing protein	Mixia osmundae IAM 14324	1	14	3.19e-06	261	1-414 (414)	255-609 (615)
AF-A0A843HWN0-F1-model_v4	EamA family transporter	Sulfolobus sp.	1	12	4.2e-05	260	47-393 (414)	2-273 (274)
AF-A0A226WYD2-F1-model_v4	Permease of the drug/metabolite transporter (DMT) superfamily	Caballeronia sordidicola	1	15	3.02e-05	260	44-414 (414)	4-308 (309)
AF-A0A6I2XZD5-F1-model_v4	EamA family transporter	Actinomycetia bacterium	1	13.7	1.11e-05	260	51-414 (414)	2-306 (311)
AF-A0A1A8TR83-F1-model_v4	EamA-like transporter family protein	Marinomonas spartinae	1	12.1	1.55e-05	260	48-408 (414)	17-323 (323)
AF-G7DT10-F1-model_v4	Uncharacterized protein	Mixia osmundae IAM 14324	1	10.9	2.02e-06	260	1-394 (414)	433-867 (1048)
AF-A0A5C9D748-F1-model_v4	Uncharacterized protein	Spirochaetes bacterium	1	13.1	1.62e-05	259	50-393 (414)	9-281 (288)
AF-A0A101V6C2-F1-model_v4	Uncharacterized protein	Desulfitibacter sp. BRH_c19	1	12.4	1.31e-05	259	51-410 (414)	3-299 (299)
AF-L0GY63-F1-model_v4	DMT(Drug/metabolite transporter) superfamily permease	Thioflavicoccus mobilis 8321	1	13.5	1.76e-05	259	35-394 (414)	2-292 (304)
AF-V8FY53-F1-model_v4	Membrane protein	Pelistega indica	1	12.6	7.84e-05	259	35-399 (414)	2-304 (305)
AF-A0A543CG06-F1-model_v4	Drug/metabolite transporter (DMT)-like permease	Actinoallomurus bryophytorum	1	13.7	3.42e-05	259	49-393 (414)	4-283 (308)
AF-A0A5J6MVG4-F1-model_v4	Membrane protein	Hypericibacter adhaerens	1	14.9	1.16e-05	259	51-414 (414)	4-299 (313)
AF-A0A318C5I4-F1-model_v4	Uncharacterized protein	Pokkaliibacter plantistimulans	1	15.1	8.67e-06	259	47-414 (414)	9-316 (316)
AF-A0A1G2CHR3-F1-model_v4	Uncharacterized protein	Candidatus Liptonbacteria bacterium RIFCSPLOWO2_01_FULL_45_15	1	13.5	1.76e-05	258	50-406 (414)	2-286 (287)
AF-A0A3C0IIA9-F1-model_v4	EamA/RhaT family transporter	Ruminococcus sp.	1	9.7	2.25e-05	258	47-403 (414)	5-289 (291)
AF-A0A7S1BQM2-F1-model_v4	Hypothetical protein	Corethron hystrix	1	13.4	4.46e-06	258	17-414 (414)	48-382 (383)
AF-A0A7K2N105-F1-model_v4	EamA family transporter	Streptomyces sp. SID6013	1	15	9.66e-05	258	166-413 (414)	164-399 (418)
AF-A0A246JMJ7-F1-model_v4	EamA family transporter	Roseateles aquatilis	1	13.3	1.43e-05	257	1-394 (414)	19-346 (350)
AF-A0A1W6L6G7-F1-model_v4	Uncharacterized protein	Rhizobacter gummiphilus	1	12.2	1.49e-05	256	22-392 (414)	2-289 (301)
AF-G7E5C9-F1-model_v4	Uncharacterized protein	Mixia osmundae IAM 14324	1	12.6	4.1e-06	256	1-411 (414)	136-515 (567)
AF-G7E0G8-F1-model_v4	TPT domain-containing protein	Mixia osmundae IAM 14324	1	13.2	1.43e-05	256	1-414 (414)	69-454 (595)
AF-A0A813E5G8-F1-model_v4	Hypothetical protein	Polarella glacialis	1	13	3.87e-05	256	51-414 (414)	5-329 (686)
AF-A0A3D1WBC8-F1-model_v4	EamA domain-containing protein	Betaproteobacteria bacterium	1	14.8	1.86e-06	255	3-414 (414)	1-341 (349)
AF-A0A226X2Z8-F1-model_v4	Permease of the drug/metabolite transporter (DMT) superfamily	Caballeronia sordidicola	1	12.6	5.4e-05	255	27-407 (414)	29-345 (354)
AF-A0A1E4EW56-F1-model_v4	Uncharacterized protein	bacterium SCN 62-11	1	13.7	3.71e-05	254	57-394 (414)	2-273 (277)
AF-A0A1G8QHJ3-F1-model_v4	Threonine/homoserine efflux transporter RhtA	Natribacillus halophilus	1	15	1.68e-05	254	48-393 (414)	3-286 (297)
AF-A0A543E3J8-F1-model_v4	Inner membrane transporter RhtA	Pseudonocardia kunmingensis	1	12.9	7.84e-05	254	47-414 (414)	8-306 (314)
AF-G6YEE7-F1-model_v4	Uncharacterized protein	Mesorhizobium amorphae CCNWGS0123	1	14.6	1.99e-05	254	47-395 (414)	3-280 (330)
AF-A0A1D1ZRU6-F1-model_v4	TPT domain-containing protein	Auxenochlorella protothecoides	1	13.5	1.11e-05	254	55-414 (414)	16-317 (433)
AF-A0A2D7D0G3-F1-model_v4	Uncharacterized protein	Marinovum sp.	1	12.8	4.38e-05	253	58-404 (414)	2-276 (277)
AF-A0A315E2B2-F1-model_v4	EamA family transporter	Limnohabitans sp. Hippo4	1	11.9	0.000159	253	62-393 (414)	2-274 (281)
AF-A0A4V6MX66-F1-model_v4	EamA family transporter	Pseudomonas dryadis	1	16.2	1.55e-05	253	47-396 (414)	4-286 (297)
AF-A0A3M1V4U3-F1-model_v4	DMT family transporter	Euryarchaeota archaeon	1	14.3	2.16e-05	253	47-402 (414)	5-298 (299)
AF-A0A5J6MZD2-F1-model_v4	Uncharacterized protein	Hypericibacter adhaerens	1	16.2	1.02e-05	253	47-411 (414)	6-304 (305)
AF-A0A1Y2FAW4-F1-model_v4	TPT-domain-containing protein	Neocallimastix californiae	1	16.1	1.51e-06	253	1-412 (414)	1-381 (409)
AF-A0A1Y5IEE4-F1-model_v4	UAA transporter family-domain-containing protein	Ostreococcus tauri	1	12	8.67e-06	253	17-399 (414)	241-569 (570)
AF-A0A1Y5IBF8-F1-model_v4	TPT domain-containing protein	Ostreococcus tauri	1	10.8	2.25e-05	253	34-413 (414)	129-463 (704)
AF-A0A1F6AI19-F1-model_v4	EamA domain-containing protein	Candidatus Gottesmanbacteria bacterium RIFCSPLOWO2_01_FULL_43_11b	1	14.4	2.55e-05	252	51-393 (414)	3-297 (299)
AF-A0A7J3LN21-F1-model_v4	DMT family transporter	Candidatus Woesearchaeota archaeon	1	11.6	5.86e-05	252	47-394 (414)	2-298 (307)
AF-A0A3A8BAE9-F1-model_v4	DMT family transporter	Roseovarius spongiae	1	14.9	1.49e-05	252	24-412 (414)	1-334 (335)
AF-A0A7L1H6H5-F1-model_v4	S35B2 protein	Nycticryphes semicollaris	1	12.1	5.05e-06	252	11-414 (414)	81-429 (431)
AF-A0A2H0NIF0-F1-model_v4	Uncharacterized protein	Candidatus Gottesmanbacteria bacterium CG11_big_fil_rev_8_21_14_0_20_37_11	1	13.7	2.07e-05	251	51-395 (414)	2-284 (287)
AF-A0A7X3GIU7-F1-model_v4	EamA family transporter	Paenibacillus sp. MMS18-CY102	1	15.1	1.43e-05	251	48-403 (414)	13-314 (315)
AF-A0A2D7LEF2-F1-model_v4	EamA domain-containing protein	Marinovum sp.	1	13.1	4.03e-05	251	46-414 (414)	6-319 (322)
AF-A0A1D1ZSP1-F1-model_v4	Uncharacterized protein	Auxenochlorella protothecoides	1	11.5	2.71e-06	251	1-408 (414)	88-465 (465)
AF-A0A2A5PKT3-F1-model_v4	EamA/RhaT family transporter	Acinetobacter sp. YT-02	1	12.2	0.000188	250	54-398 (414)	3-285 (286)
AF-A0A7J4I0X5-F1-model_v4	DMT family transporter	Candidatus Woesearchaeota archaeon	1	12.3	1.49e-05	250	47-395 (414)	2-294 (295)
AF-H1S5G1-F1-model_v4	Uncharacterized protein	Cupriavidus basilensis OR16	1	13.6	1.49e-05	250	49-408 (414)	2-313 (313)
AF-A0A286UJ76-F1-model_v4	UAA transporter	Pyrrhoderma noxium	1	11.6	1.83e-05	250	1-395 (414)	1-338 (339)
AF-G7DZH2-F1-model_v4	TPT domain-containing protein	Mixia osmundae IAM 14324	1	12.6	2.82e-06	250	1-413 (414)	71-407 (447)
AF-A0A7K2D8S1-F1-model_v4	DMT family transporter	Acidimicrobiaceae bacterium	1	12.1	0.000381	249	51-394 (414)	2-275 (277)
AF-A0A1H3CAT7-F1-model_v4	Threonine/homoserine efflux transporter RhtA	Eubacterium barkeri	1	12.4	7.84e-05	249	51-397 (414)	3-283 (284)
AF-A0A8B4GHY3-F1-model_v4	EamA-like transporter family	Eikenella corrodens	1	13.6	6.11e-05	249	55-403 (414)	18-302 (305)
AF-A0A494XYV4-F1-model_v4	DMT family transporter	Trinickia fusca	1	14.1	4.76e-05	249	1-393 (414)	7-332 (336)
AF-A0A7S1BHD4-F1-model_v4	Hypothetical protein	Corethron hystrix	1	11.2	1.55e-05	249	4-414 (414)	1-386 (393)
AF-A0A6H5JG64-F1-model_v4	TPT domain-containing protein	Ectocarpus sp. CCAP 1310/34	1	12.8	5.72e-06	249	1-405 (414)	569-949 (950)
AF-A0A1F4U711-F1-model_v4	Uncharacterized protein	candidate division WOR-1 bacterium RIFOXYC2_FULL_46_14	1	14.8	2.89e-05	248	56-401 (414)	2-272 (275)
AF-Q1N6K8-F1-model_v4	EamA domain-containing protein	Bermanella marisrubri	1	15.6	3.28e-05	248	50-394 (414)	2-280 (283)
AF-A0A087SF78-F1-model_v4	Adenosine 3'-phospho 5'-phosphosulfate transporter 1	Auxenochlorella protothecoides	1	10.2	0.000114	248	28-402 (414)	1-332 (346)
AF-A0A134DK08-F1-model_v4	Multidrug DMT transporter permease	Microbacterium hominis	1	14	7.97e-06	248	47-413 (414)	8-321 (363)
AF-A0A7S0PZ44-F1-model_v4	Hypothetical protein	Coccolithus braarudii	1	12.2	2.16e-05	248	22-414 (414)	15-377 (382)
AF-A0A7G3AEA1-F1-model_v4	Putative calcium-dependent channel	Lutzomyia longipalpis	1	11.7	3.56e-05	248	45-414 (414)	4-324 (1232)
AF-A0A7D7RMP6-F1-model_v4	DMT family transporter	Neisseria shayeganii	1	13.4	5.18e-05	247	56-402 (414)	7-295 (296)
AF-G7W6W5-F1-model_v4	Putative permease, DMT superfamily	Desulfosporosinus orientis DSM 765	1	12.2	3.56e-05	247	47-414 (414)	3-316 (316)
AF-A0A6I6YL66-F1-model_v4	Drug/metabolite DMT transporter permease	Rhodococcus rhodochrous	1	15	7.22e-05	247	51-407 (414)	10-304 (328)
AF-A0A2T0QXL2-F1-model_v4	Drug/metabolite transporter (DMT)-like permease	Kineococcus rhizosphaerae	1	11.1	1.99e-05	247	51-414 (414)	14-298 (345)
AF-A0A536P7G3-F1-model_v4	DMT family transporter	Chloroflexi bacterium	1	13.7	3.62e-06	247	1-394 (414)	120-458 (467)
AF-A0A3M0ZWH8-F1-model_v4	EamA domain-containing protein	Candidatus Dadabacteria bacterium	1	11.7	0.000129	246	51-394 (414)	5-279 (282)
AF-A0A7Y3EG18-F1-model_v4	DMT family transporter	Gemmatimonadetes bacterium	1	15.5	7.22e-05	246	51-414 (414)	5-300 (306)
AF-A0A087SIL3-F1-model_v4	Putative UDP-sugar transporter	Auxenochlorella protothecoides	1	13.5	0.000109	246	48-413 (414)	7-309 (311)
AF-A0A3N5HUZ5-F1-model_v4	DMT family transporter	Candidatus Rokubacteria bacterium	1	14.6	1.55e-05	246	51-393 (414)	72-356 (364)
AF-A0A7U3VSG8-F1-model_v4	Putative membrane protein	Streptomyces sp. SN-593	1	11.5	1.43e-05	246	44-394 (414)	3-372 (402)
AF-A0A2E8IRP0-F1-model_v4	Transporter	bacterium	1	12.7	5.4e-05	245	49-398 (414)	8-296 (300)
AF-A0A1Y5FNB8-F1-model_v4	Uncharacterized protein	Gammaproteobacteria bacterium 54_18_T64	1	14.4	5.86e-05	245	50-413 (414)	2-298 (302)
AF-A0A2P8DWI6-F1-model_v4	Drug/metabolite transporter (DMT)-like permease	Haloactinopolyspora alba	1	14.8	3.28e-05	245	15-394 (414)	2-301 (308)
AF-A0A1Y5I6W2-F1-model_v4	DMT family transporter: drug/metabolite	Ostreococcus tauri	1	14.7	1.16e-05	245	34-400 (414)	11-308 (309)
AF-A0A7S0Q8F6-F1-model_v4	Hypothetical protein	Coccolithus braarudii	1	14.3	1.21e-05	245	1-393 (414)	9-344 (367)
AF-A0A0W4ZP74-F1-model_v4	TPT domain-containing protein	Pneumocystis carinii B80	1	12.1	4.76e-05	245	32-414 (414)	41-378 (398)
AF-A0A0D2EXU5-F1-model_v4	Unplaced genomic scaffold supercont1.5, whole genome shotgun sequence	Fonsecaea pedrosoi CBS 271.37	1	13.5	1.71e-06	245	1-394 (414)	17-371 (425)
AF-A0A1H8EEE8-F1-model_v4	Permease of the drug/metabolite transporter (DMT) superfamily	Actinacidiphila rubida	1	12.3	1.99e-05	245	30-414 (414)	9-323 (448)
AF-A0A521RUX6-F1-model_v4	DMT family transporter	Nitrospirae bacterium	1	17.6	3.42e-05	244	167-407 (414)	21-250 (259)
AF-A0A5J6N1N9-F1-model_v4	ABC transporter permease	Hypericibacter adhaerens	1	11.4	3.71e-05	244	22-398 (414)	3-307 (310)
AF-A0A5E4ZAR4-F1-model_v4	Multidrug DMT transporter permease	Pandoraea terrae	1	12.5	2.66e-05	243	51-394 (414)	19-303 (307)
AF-A0A369H8I3-F1-model_v4	TPT domain-containing protein	Ophiocordyceps camponoti-saundersi (nom. inval.)	1	13.7	3.02e-05	243	1-403 (414)	1-330 (331)
AF-A0A813EDN9-F1-model_v4	Hypothetical protein	Polarella glacialis	1	15.3	3.56e-05	243	33-407 (414)	12-337 (344)
AF-A0A6H5JQQ4-F1-model_v4	Uncharacterized protein	Ectocarpus sp. CCAP 1310/34	1	14.2	7.22e-05	243	12-407 (414)	5-346 (348)
AF-A0A183IKF2-F1-model_v4	EamA domain-containing protein	Soboliphyme baturini	1	9.8	4.97e-05	243	44-409 (414)	68-408 (591)
AF-A0A0Q9LPY8-F1-model_v4	Uncharacterized protein	Phycicoccus sp. Soil748	1	15.6	7.84e-05	242	168-414 (414)	40-262 (271)
AF-G6Y8C0-F1-model_v4	EamA domain-containing protein	Mesorhizobium amorphae CCNWGS0123	1	11.3	0.000285	242	51-394 (414)	2-276 (278)
AF-G7E2Y7-F1-model_v4	Uncharacterized protein	Mixia osmundae IAM 14324	1	10.7	6.64e-05	242	44-412 (414)	2-371 (377)
AF-A0A150GVV5-F1-model_v4	TPT domain-containing protein	Gonium pectorale	1	11.7	2.35e-05	242	44-410 (414)	4-331 (500)
AF-A0A6H5IY12-F1-model_v4	Uncharacterized protein	Trichogramma brassicae	1	12.5	9.42e-06	242	1-414 (414)	13-418 (545)
AF-A0A162B2C9-F1-model_v4	Uncharacterized protein	Daucus carota subsp. sativus	1	15	7.34e-06	242	24-411 (414)	1-360 (740)
AF-A0A6I2XYX1-F1-model_v4	EamA family transporter	Actinomycetia bacterium	1	13	5.4e-05	241	51-395 (414)	2-276 (277)
AF-A0A2V7YRA6-F1-model_v4	Uncharacterized protein	Acidobacteria bacterium	1	12.9	3.87e-05	241	51-394 (414)	7-286 (287)
AF-A0A847MXH3-F1-model_v4	DMT family transporter	Intrasporangiaceae bacterium	1	13.4	2.78e-05	241	84-413 (414)	11-289 (297)
AF-A0A6I3SZ59-F1-model_v4	EamA family transporter	Pseudoduganella buxea	1	12.9	0.000129	241	47-413 (414)	13-300 (300)
AF-A0A7C4NMS2-F1-model_v4	DMT family transporter	Staphylothermus marinus	1	13	3.71e-05	241	44-398 (414)	22-305 (306)
AF-A0A3D9UPJ8-F1-model_v4	Transporter family-2 protein	Calidifontibacter indicus	1	14.7	6.93e-05	241	35-411 (414)	2-334 (335)
AF-A0A519LT39-F1-model_v4	Permease	Flavobacterium sp.	1	19	0.00035	240	169-394 (414)	3-224 (226)
AF-A0A3D3EYY8-F1-model_v4	Uncharacterized protein	Candidatus Cloacimonas sp.	1	14.8	0.000309	240	166-413 (414)	20-257 (260)
AF-A0A346A2X3-F1-model_v4	DMT family transporter	Pseudolabrys taiwanensis	1	16.2	6.64e-05	240	34-396 (414)	28-323 (330)
AF-A0A194S2S9-F1-model_v4	TPT domain-containing protein	Rhodotorula graminis WP1	1	11.6	2.78e-05	240	1-412 (414)	4-382 (383)
AF-A0A6N7VQ24-F1-model_v4	DMT family transporter	Fusobacterium sp. FSA-380-WT-2B	1	14.1	2.45e-05	239	45-393 (414)	2-297 (302)
AF-A0A2E5QQP2-F1-model_v4	Uncharacterized protein	Roseibacillus sp.	1	12.9	7.53e-05	239	26-414 (414)	39-344 (349)
AF-A0A1D1ZRK0-F1-model_v4	TPT domain-containing protein	Auxenochlorella protothecoides	1	11.9	6.64e-05	239	1-414 (414)	3-356 (370)
AF-A0A328B9T7-F1-model_v4	EamA/RhaT family transporter	Phenylobacterium kunshanense	1	15.1	3.28e-05	238	48-401 (414)	11-292 (293)
AF-A0A2J9H8U7-F1-model_v4	EamA/RhaT family transporter	Burkholderia glumae	1	13.5	3.14e-05	238	47-414 (414)	4-297 (300)
AF-A0A066WRS3-F1-model_v4	Permease	Flavobacterium seoulense	1	18.8	3.56e-05	237	169-394 (414)	36-257 (259)
AF-A0A2S6RS21-F1-model_v4	Riboflavin transporter	Alphaproteobacteria bacterium MarineAlpha9_Bin6	1	12.8	2.55e-05	237	58-405 (414)	2-277 (278)
AF-A0A7S0Q337-F1-model_v4	Hypothetical protein	Coccolithus braarudii	1	11.1	8.31e-06	237	22-414 (414)	3-418 (451)
AF-A0A5D8QD76-F1-model_v4	EamA family transporter	Calorimonas adulescens	1	13.8	0.00014	236	49-393 (414)	2-281 (283)
AF-A0A6J7NUZ2-F1-model_v4	Unannotated protein	freshwater metagenome	1	15.4	0.00035	236	50-394 (414)	4-279 (283)
AF-A0A1I4MB95-F1-model_v4	EamA-like transporter family protein	Marinobacter zhejiangensis	1	13.5	9.66e-05	236	47-394 (414)	2-283 (286)
AF-F6EKY8-F1-model_v4	Drug/metabolite transporter, DME family	Hoyosella subflava DQS3-9A1	1	15.4	7.53e-05	236	51-394 (414)	17-300 (305)
AF-A0A2G6MZM7-F1-model_v4	EamA family transporter	Desulfobacterales bacterium	1	11.5	0.000101	236	22-402 (414)	2-307 (317)
AF-A0A6J7JX64-F1-model_v4	Unannotated protein	freshwater metagenome	1	14.3	8.89e-05	235	45-402 (414)	2-291 (292)
AF-A0A6J0ANS0-F1-model_v4	UDP-N-acetylglucosamine/UDP-glucose/GDP-mannose transporter isoform X3	Vicugna pacos	1	17.3	5.86e-05	235	74-414 (414)	7-285 (295)
AF-A0A6H5JGJ9-F1-model_v4	TPT domain-containing protein	Ectocarpus sp. CCAP 1310/34	1	12.3	4.1e-06	235	22-414 (414)	29-386 (388)
AF-A0A2D7D560-F1-model_v4	EamA domain-containing protein	Marinovum sp.	1	16.1	0.00045	234	51-395 (414)	3-279 (282)
AF-A0A4R6VPZ8-F1-model_v4	EamA-like transporter family protein	Maritalea mobilis	1	12	0.00018	234	47-399 (414)	12-305 (308)
AF-A0A2M9ZPD6-F1-model_v4	Uncharacterized protein	Leptospira perolatii	1	13	1.91e-05	234	47-414 (414)	9-320 (331)
AF-A0A7S1I075-F1-model_v4	Hypothetical protein	Eutreptiella gymnastica	1	12.2	1.68e-05	234	22-412 (414)	3-334 (375)
AF-A0A369HDZ0-F1-model_v4	Uncharacterized protein	Ophiocordyceps camponoti-saundersi (nom. inval.)	1	13.4	9.82e-06	234	1-395 (414)	1-360 (416)
AF-A0A3M1VMF6-F1-model_v4	EamA family transporter	Candidatus Dadabacteria bacterium	1	11.4	2.78e-05	233	51-401 (414)	2-287 (288)
AF-A0A1G0G042-F1-model_v4	EamA domain-containing protein	Gammaproteobacteria bacterium RIFCSPHIGHO2_12_FULL_35_23	1	11.5	0.000262	233	47-394 (414)	4-294 (299)
AF-A0A8A4E2X0-F1-model_v4	DMT family transporter	Burkholderia pseudomallei	1	10.4	0.000336	233	47-393 (414)	4-287 (302)
AF-A0A087SBC8-F1-model_v4	UDP-galactose transporter 2	Auxenochlorella protothecoides	1	14.4	0.000273	233	170-414 (414)	27-272 (309)
AF-G4NGT7-F1-model_v4	TPT domain-containing protein	Pyricularia oryzae 70-15	1	12.1	0.000109	233	22-414 (414)	4-335 (378)
AF-A0A067QXW1-F1-model_v4	Solute carrier family 35 member F1	Zootermopsis nevadensis	1	14.5	2.45e-05	233	1-414 (414)	69-431 (480)
AF-A0A6P4JA20-F1-model_v4	uncharacterized transporter YdeD-like	Drosophila kikkawai	1	13.4	0.000627	232	168-395 (414)	2-219 (224)
AF-C6TCV8-F1-model_v4	TPT domain-containing protein	Glycine max	1	11.2	0.000114	232	39-412 (414)	2-323 (323)
AF-A0A6B2LF33-F1-model_v4	TPT domain-containing protein	Arcella intermedia	1	16.3	0.000273	231	182-412 (414)	2-231 (237)
AF-A0A3C1PGX3-F1-model_v4	EamA domain-containing protein	Bacteroidales bacterium	1	13.7	0.000213	231	53-395 (414)	2-286 (287)
AF-A0A0A6URP1-F1-model_v4	Permease, DMT family protein	Actinoplanes utahensis	1	12.1	4.76e-05	231	46-392 (414)	2-293 (318)
AF-A0A3P6GHX2-F1-model_v4	TPT domain-containing protein	Brassica oleracea	1	12.7	3.56e-05	231	20-398 (414)	49-361 (362)
AF-A0A519Z874-F1-model_v4	DMT family transporter	Rubrivivax sp.	1	18.3	0.000414	230	185-414 (414)	3-227 (232)
AF-A0A1A8T4G8-F1-model_v4	EamA-like transporter family protein	Marinomonas spartinae	1	11.9	0.000204	230	51-403 (414)	3-307 (308)
AF-A0A4T2C0F9-F1-model_v4	EamA/RhaT family transporter	Subtercola vilae	1	13.1	4.76e-05	230	48-414 (414)	6-326 (346)
AF-A0A1Y5IDF5-F1-model_v4	WAT1-related protein	Ostreococcus tauri	1	12.4	8.89e-05	230	1-407 (414)	19-356 (366)
AF-A0A671UT10-F1-model_v4	UDP-N-acetylglucosamine/UDP-glucose/GDP-mannose transporter-like	Sparus aurata	1	11.2	7.84e-05	229	33-407 (414)	11-325 (338)
AF-A0A673MT18-F1-model_v4	Solute carrier family 35 member F1-like	Sinocyclocheilus rhinocerous	1	10.4	8.52e-05	229	34-414 (414)	22-365 (365)
AF-A0A6H5JE24-F1-model_v4	Uncharacterized protein	Ectocarpus sp. CCAP 1310/34	1	13.5	6.21e-06	229	1-414 (414)	9-367 (410)
AF-A0A2U8E0B0-F1-model_v4	Uncharacterized protein	Ereboglobus luteus	1	14.6	0.000153	228	53-393 (414)	2-278 (284)
AF-A0A087SL48-F1-model_v4	Putative sugar phosphate/phosphate translocator	Auxenochlorella protothecoides	1	12.2	0.000166	228	49-413 (414)	2-310 (328)
AF-A9CXC7-F1-model_v4	Putative membrane protein	Hoeflea phototrophica DFL-43	1	13.9	6.37e-05	228	24-395 (414)	26-346 (347)
AF-K0KSY6-F1-model_v4	Putative membrane protein	Wickerhamomyces ciferrii NRRL Y-1031	1	17	1.99e-05	228	43-394 (414)	2-341 (374)
AF-A0A2M9ZPA6-F1-model_v4	Uncharacterized protein	Leptospira perolatii	1	13.2	0.000241	227	63-393 (414)	3-276 (282)
AF-A0A2V6UL09-F1-model_v4	Uncharacterized protein	Candidatus Rokubacteria bacterium	1	14.6	5.63e-05	227	47-395 (414)	3-293 (293)
AF-A0A7C3IJ92-F1-model_v4	EamA domain-containing protein	Armatimonadetes bacterium	1	11.3	6.64e-05	227	50-393 (414)	3-291 (294)
AF-A0A1D1ZUE1-F1-model_v4	Uncharacterized protein	Auxenochlorella protothecoides	1	13.1	4.2e-05	227	26-394 (414)	38-342 (385)
AF-A0A2L2Y8C1-F1-model_v4	Solute carrier family 35 member G1	Parasteatoda tepidariorum	1	13.7	4.97e-05	227	8-412 (414)	62-398 (408)
AF-A0A6N7ZRY3-F1-model_v4	DMT family transporter	Roseibium sp. RKSG952	1	11.5	0.000251	226	50-397 (414)	2-296 (296)
AF-A0A6I1I4T6-F1-model_v4	EamA family transporter	Janthinobacterium sp. FT14W	1	11.5	0.000297	226	51-393 (414)	14-285 (301)
AF-A0A1X6ZWN1-F1-model_v4	EamA-like transporter family protein	Roseivivax jejudonensis	1	14.7	6.11e-05	226	47-394 (414)	4-300 (302)
AF-A0A2E8CS06-F1-model_v4	EamA domain-containing protein	Verrucomicrobiales bacterium	1	14.5	0.000114	226	51-404 (414)	5-301 (303)
AF-A0A2S5KTP6-F1-model_v4	EamA family transporter	Proteobacteria bacterium 228	1	15.4	6.64e-05	225	51-394 (414)	17-301 (303)
AF-A0A087ST93-F1-model_v4	Xylulose 5-phosphate/phosphate translocator, chloroplastic	Auxenochlorella protothecoides	1	15.2	0.000531	224	166-409 (414)	17-268 (269)
AF-A0A7Y2EYU5-F1-model_v4	DMT family transporter	Flavobacteriales bacterium	1	15.6	4.03e-05	224	59-393 (414)	2-286 (300)
AF-E0XTN8-F1-model_v4	7 permeases of the drug/metabolite transporter (Dmt) superfamily	uncultured nuHF1 cluster bacterium HF0130_31E21	1	11.9	0.000101	224	6-404 (414)	1-322 (325)
AF-A0A7C8UBQ9-F1-model_v4	TPT domain-containing protein	Orbilia oligospora	1	14.9	0.000381	224	165-407 (414)	23-264 (333)
AF-A0A838J4N5-F1-model_v4	EamA family transporter	Ktedonobacteraceae bacterium	1	10.7	0.000146	224	49-397 (414)	3-374 (375)
AF-B9KAP9-F1-model_v4	Uncharacterized protein	Thermotoga neapolitana DSM 4359	1	15.5	0.000146	223	167-414 (414)	33-248 (248)
AF-A0A1V6A2N0-F1-model_v4	Putative inner membrane transporter YedA	Synergistetes bacterium ADurb.Bin155	1	12.1	0.000231	223	50-414 (414)	4-300 (300)
AF-A0A752VRM2-F1-model_v4	DMT family transporter	Salmonella enterica subsp. enterica serovar Carrau	1	12.9	0.000251	223	49-407 (414)	9-320 (323)
AF-A0A2S5KRU9-F1-model_v4	EamA/RhaT family transporter	Proteobacteria bacterium 228	1	12.6	7.22e-05	222	48-404 (414)	6-305 (310)
AF-A0A7S0Q415-F1-model_v4	Hypothetical protein	Coccolithus braarudii	1	12.1	0.000101	222	1-414 (414)	56-412 (458)
AF-A0A356PTF5-F1-model_v4	EamA family transporter	Oscillospiraceae bacterium	1	16.4	0.000839	221	152-402 (414)	1-233 (234)
AF-A0A087SB53-F1-model_v4	Solute carrier family 35 member G1	Auxenochlorella protothecoides	1	13.6	0.000105	221	53-413 (414)	2-308 (357)
AF-A0A0Q9U5D3-F1-model_v4	Uncharacterized protein	Paenibacillus sp. Soil787	1	15.1	0.000213	220	48-393 (414)	3-285 (289)
AF-A0A0M2V5T4-F1-model_v4	Multidrug DMT transporter permease	Arsukibacterium ikkense	1	13	0.000188	220	51-400 (414)	4-279 (295)
AF-A0A120K175-F1-model_v4	HBR181Cp	Eremothecium sinecaudum	1	12.7	1.76e-05	220	56-408 (414)	12-352 (352)
AF-A0A0E0B184-F1-model_v4	TPT domain-containing protein	Oryza glumipatula	1	13.3	0.000414	219	45-414 (414)	2-313 (343)
AF-A0A090N3B4-F1-model_v4	Triose-phosphate transporter domain	Ostreococcus tauri	1	9.1	8.18e-05	219	34-413 (414)	33-367 (382)
AF-A0A1J5QXR7-F1-model_v4	EamA-like transporter family protein	mine drainage metagenome	1	11.3	0.000196	218	48-395 (414)	3-283 (295)
AF-A0A353B7X4-F1-model_v4	EamA domain-containing protein	Planctomycetaceae bacterium	1	10.9	0.000365	218	161-414 (414)	44-291 (305)
AF-A0A7X3KH24-F1-model_v4	EamA family transporter	Paenibacillus sp. MMS18-CY102	1	12.6	7.22e-05	218	48-394 (414)	13-303 (319)
AF-A0A6L8KUM6-F1-model_v4	EamA family transporter	Duganella sp. CY15W	1	12.2	0.000188	217	51-413 (414)	2-303 (307)
AF-A0A537JZ23-F1-model_v4	EamA family transporter	Bacteroidetes bacterium	1	11.2	0.000196	217	49-414 (414)	10-313 (314)
AF-A0A1G0ZKC6-F1-model_v4	Uncharacterized protein	Lentisphaerae bacterium GWF2_52_8	1	14.1	0.000188	216	47-399 (414)	3-301 (302)
AF-A0A162ACQ8-F1-model_v4	TPT domain-containing protein	Daucus carota subsp. sativus	1	13.2	0.000119	216	31-412 (414)	1-314 (387)
AF-A0A7S1YK29-F1-model_v4	Hypothetical protein	Grammatophora oceanica	1	12.3	3.02e-05	216	1-414 (414)	60-476 (537)
AF-A0A1F6AHF5-F1-model_v4	Uncharacterized protein	Candidatus Gottesmanbacteria bacterium RIFCSPLOWO2_01_FULL_43_11b	1	12.1	0.000135	215	51-393 (414)	3-282 (287)
AF-A0A136LZC2-F1-model_v4	EamA-like transporter family protein	candidate division WS6 bacterium OLB20	1	13.7	0.000159	215	51-395 (414)	2-287 (288)
AF-A0A1A8TE00-F1-model_v4	Aromatic amino acid exporter YddG	Marinomonas spartinae	1	11.2	0.000129	215	51-393 (414)	5-292 (306)
AF-A0A6C0BKU2-F1-model_v4	EamA domain-containing protein	viral metagenome	1	9.7	0.000509	215	50-396 (414)	9-321 (322)
AF-A0A0D0DWM6-F1-model_v4	Unplaced genomic scaffold scaffold_687, whole genome shotgun sequence	Paxillus rubicundulus Ve08.2h10	1	13.2	6.93e-05	215	2-392 (414)	1-353 (358)
AF-A0A124SDK2-F1-model_v4	Probable purine permease	Cynara cardunculus var. scolymus	1	12.4	4.03e-05	215	1-414 (414)	10-389 (401)
AF-A0A6H5JMM1-F1-model_v4	TPT domain-containing protein	Ectocarpus sp. CCAP 1310/34	1	14.7	1.68e-05	215	1-395 (414)	1-389 (496)
AF-S3D2B1-F1-model_v4	Uncharacterized protein	Glarea lozoyensis ATCC 20868	1	10.1	2.35e-05	215	1-414 (414)	9-388 (699)
AF-A0A2M8DRN7-F1-model_v4	EamA domain-containing protein	Candidatus Komeilibacteria bacterium CG_4_9_14_0_8_um_filter_36_9	1	11.9	0.000285	214	52-393 (414)	2-294 (295)
AF-A0A087SMI8-F1-model_v4	Solute carrier family 35 member F6	Auxenochlorella protothecoides	1	11.8	5.86e-05	214	55-414 (414)	8-367 (392)
AF-A0A1M5LH03-F1-model_v4	Permease of the drug/metabolite transporter (DMT) superfamily	Streptoalloteichus hindustanus	1	13.6	0.000129	213	48-414 (414)	11-312 (339)
AF-A0A1J4MAN0-F1-model_v4	Uncharacterized protein	Cryptosporidium andersoni	1	11.9	5.63e-05	213	20-412 (414)	15-419 (446)
AF-A0A536PNH4-F1-model_v4	DMT family transporter	Chloroflexi bacterium	1	11	0.000654	212	51-393 (414)	2-280 (282)
AF-A0A521J5S0-F1-model_v4	EamA family transporter	Gottschalkiaceae bacterium	1	14.7	0.000222	212	50-395 (414)	4-285 (286)
AF-A0A6P6NII7-F1-model_v4	UDP-N-acetylglucosamine/UDP-glucose/GDP-mannose transporter-like isoform X1	Carassius auratus	1	10.9	0.000105	212	34-406 (414)	14-333 (333)
AF-A0A7S0Q031-F1-model_v4	Hypothetical protein	Coccolithus braarudii	1	12	0.000129	212	32-414 (414)	22-354 (411)
AF-A0A6H5JPW1-F1-model_v4	Uncharacterized protein	Ectocarpus sp. CCAP 1310/34	1	13.4	5.18e-05	212	1-401 (414)	1-336 (427)
AF-A0A672U828-F1-model_v4	Solute carrier family 35 member B3	Strigops habroptila	1	13.3	2.45e-05	212	1-410 (414)	82-444 (453)
AF-A6CXM1-F1-model_v4	Uncharacterized protein	Vibrio mediterranei AK1	1	14.4	0.000173	211	171-407 (414)	2-235 (237)
AF-A0A854KH40-F1-model_v4	EamA family transporter	Bacillus thuringiensis serovar shandongiensis	1	13.7	0.000129	211	51-413 (414)	4-300 (302)
AF-T0R306-F1-model_v4	Uncharacterized protein	Saprolegnia diclina VS20	1	12.7	2.89e-05	211	48-414 (414)	9-397 (401)
AF-A0A815T2Z7-F1-model_v4	Hypothetical protein	Rotaria sp. Silwood1	1	15.6	2.25e-05	211	29-402 (414)	107-419 (421)
AF-A0A2H0N3Y7-F1-model_v4	Uncharacterized protein	Candidatus Magasanikbacteria bacterium CG11_big_fil_rev_8_21_14_0_20_39_34	1	12.2	0.000309	210	51-395 (414)	3-285 (286)
AF-A0A3M1VJ19-F1-model_v4	Uncharacterized protein	Candidatus Dadabacteria bacterium	1	13.8	0.00103	210	49-395 (414)	2-287 (290)
AF-A0A087SKV6-F1-model_v4	Putative sugar phosphate/phosphate translocator	Auxenochlorella protothecoides	1	13.9	6.93e-05	210	2-399 (414)	41-402 (403)
AF-A0A0P9GQZ1-F1-model_v4	Uncharacterized protein	Acidiplasma aeolicum	1	11.9	0.000188	209	51-394 (414)	4-290 (291)
AF-A0A813EN67-F1-model_v4	Hypothetical protein	Polarella glacialis	1	11.7	8.89e-05	209	1-407 (414)	2-393 (406)
AF-A0A2J6WN30-F1-model_v4	EamA family transporter	Calditerrivibrio nitroreducens	1	13.5	0.000153	208	50-393 (414)	2-275 (279)
AF-A0A087SQ21-F1-model_v4	Putative sugar phosphate/phosphate translocator	Auxenochlorella protothecoides	1	13.2	0.000222	208	52-409 (414)	7-311 (341)
AF-A0A5C5YBV5-F1-model_v4	EamA-like transporter family protein	Crateriforma conspicua	1	12.8	0.000124	207	1-394 (414)	2-343 (346)
AF-A0A838J6W6-F1-model_v4	EamA family transporter	Ktedonobacteraceae bacterium	1	13.3	0.00122	206	44-346 (414)	9-249 (252)
AF-A0A7Y4LCQ6-F1-model_v4	DMT family transporter	Pelistega europaea	1	12	0.000509	206	50-395 (414)	4-289 (297)
AF-A0A1J5R163-F1-model_v4	Putative DMT superfamily transporter inner membrane protein	mine drainage metagenome	1	13.4	0.000531	205	25-374 (414)	1-273 (288)
AF-B1ZTK6-F1-model_v4	Sugar transport family protein	Opitutus terrae PB90-1	1	12.1	0.000654	205	50-394 (414)	2-292 (296)
AF-A0A7S1BIK9-F1-model_v4	Hypothetical protein	Corethron hystrix	1	10.8	0.000124	205	47-414 (414)	155-488 (493)
AF-A0A1V6A350-F1-model_v4	EamA-like transporter family protein	Synergistetes bacterium ADurb.Bin155	1	12.2	0.000213	204	50-394 (414)	4-284 (286)
AF-M5Q2R1-F1-model_v4	Putative membrane protein	Desulfocurvibacter africanus PCS	1	11.2	0.000285	204	46-395 (414)	2-291 (293)
AF-A0A315D1T1-F1-model_v4	EamA family transporter	Limnohabitans sp. Hippo4	1	13.9	0.000839	204	51-397 (414)	4-298 (299)
AF-A0A6B2L982-F1-model_v4	Uncharacterized protein	Arcella intermedia	1	9.3	0.000627	203	42-407 (414)	22-330 (335)
AF-A0A2E6SAU5-F1-model_v4	Uncharacterized protein	Roseibacillus sp.	1	14.4	0.00201	202	60-402 (414)	2-275 (276)
AF-A0A1G0YVK6-F1-model_v4	EamA domain-containing protein	Lentisphaerae bacterium GWF2_52_8	1	12.7	0.00045	202	51-396 (414)	2-282 (283)
AF-A0A1Y5IDW7-F1-model_v4	Integral membrane protein-like protein	Ostreococcus tauri	1	15.2	0.000213	202	1-393 (414)	28-353 (361)
AF-A0A136LZB5-F1-model_v4	EamA-like transporter family protein	candidate division WS6 bacterium OLB20	1	13.7	0.000222	201	51-392 (414)	3-285 (288)
AF-A0A5J5DB18-F1-model_v4	TPT domain-containing protein	Etheostoma spectabile	1	10.7	0.000105	201	39-407 (414)	2-294 (488)
AF-A0A843IN86-F1-model_v4	DMT family transporter	Methanocorpusculaceae archaeon	1	13.6	0.00095	200	162-394 (414)	22-241 (246)
AF-A0A6J1UQ13-F1-model_v4	adenosine 3'-phospho 5'-phosphosulfate transporter 2 isoform X1	Notechis scutatus	1	14	5.18e-05	200	1-410 (414)	102-451 (458)
AF-A0A7J7NI14-F1-model_v4	Probable purine permease	Kingdonia uniflora	1	12.2	6.11e-05	200	125-414 (414)	240-525 (528)
AF-W7W9Z5-F1-model_v4	Putative gamma-glutamyltransferase YwrD	Methylibium sp. T29	1	16.1	0.000135	200	13-393 (414)	541-839 (843)
AF-A0A5C6FYH5-F1-model_v4	Uncharacterized protein	Crateriforma conspicua	1	14.1	0.000553	199	50-393 (414)	4-299 (300)
AF-A0A2G6DCW1-F1-model_v4	EamA family transporter	Proteobacteria bacterium	1	11	0.000262	199	84-413 (414)	3-282 (306)
AF-I1JLT6-F1-model_v4	TPT domain-containing protein	Glycine max	1	8.6	0.000322	199	32-408 (414)	1-330 (330)
AF-A0A085MWR8-F1-model_v4	Uncharacterized protein	Trichuris suis	1	12.8	0.000173	199	1-409 (414)	20-364 (389)
AF-A0A494TEE3-F1-model_v4	DMT family transporter	Sphingomonas paeninsulae	1	18.4	0.000336	198	167-393 (414)	44-255 (261)
AF-A0A0N4X9U8-F1-model_v4	CRT-like domain-containing protein	Haemonchus placei	1	14.8	0.000105	198	152-406 (414)	18-334 (348)
AF-A0A842TQ63-F1-model_v4	Uncharacterized protein	Candidatus Lokiarchaeota archaeon	1	12.4	3.28e-05	198	51-403 (414)	31-422 (476)
AF-A0A6G1HER1-F1-model_v4	NAD(P)-binding protein	Aulographum hederae CBS 113979	1	13.1	0.000577	197	52-393 (414)	40-329 (625)
AF-A0A1S9DIK0-F1-model_v4	Lipase class 3	Aspergillus oryzae	1	13.8	0.000101	197	1-401 (414)	7-345 (1197)
AF-A0A1H9KM75-F1-model_v4	EamA domain-containing membrane protein RarD	Chelativorans sp. A52C2	1	14	0.000601	196	52-414 (414)	10-299 (303)
AF-A0A096P8J5-F1-model_v4	Triose-phosphate transporter domain	Ostreococcus tauri	1	14.4	0.000231	196	31-412 (414)	1-320 (323)
AF-A0A453IBQ0-F1-model_v4	TPT domain-containing protein	Aegilops tauschii subsp. strangulata	1	18	0.00156	196	165-399 (414)	160-389 (392)
AF-A0A813E689-F1-model_v4	Hypothetical protein	Polarella glacialis	1	11.8	0.000874	196	24-411 (414)	80-421 (437)
AF-A0A6P6NJG1-F1-model_v4	UDP-N-acetylglucosamine/UDP-glucose/GDP-mannose transporter-like isoform X3	Carassius auratus	1	11.9	0.000654	195	170-406 (414)	37-270 (270)
AF-A0A4Y2L3G3-F1-model_v4	Solute carrier family 35 member G1	Araneus ventricosus	1	12.5	0.000336	195	58-414 (414)	3-301 (394)
AF-A0A2V2L912-F1-model_v4	EamA/RhaT family transporter	Meridianimarinicoccus roseus	1	11	0.000213	194	54-400 (414)	3-290 (309)
AF-A0A010YD01-F1-model_v4	Putative permease, DMT superfamily	Cloacibacillus evryensis DSM 19522	1	15	0.000654	193	80-395 (414)	1-260 (260)
AF-A0A2V2S928-F1-model_v4	Uncharacterized protein	Candidatus Rokubacteria bacterium	1	15.1	0.0015	193	69-396 (414)	2-265 (266)
AF-A0A7D7NBK3-F1-model_v4	EamA family transporter	Neisseria shayeganii	1	10.7	0.0017	193	54-408 (414)	3-292 (292)
AF-A0A6B1CKP8-F1-model_v4	Uncharacterized protein	Gemmatimonadetes bacterium	1	12.7	0.00095	193	21-393 (414)	3-310 (312)
AF-A0A6B2LE24-F1-model_v4	EamA domain-containing protein	Arcella intermedia	1	17.8	0.00099	191	175-412 (414)	3-238 (266)
AF-A0A2G6J6M0-F1-model_v4	Uncharacterized protein	Proteobacteria bacterium	1	14.8	0.000654	191	168-399 (414)	34-265 (267)
AF-A0A162A9H5-F1-model_v4	WAT1-related protein	Daucus carota subsp. sativus	1	13.1	0.000159	191	34-414 (414)	2-340 (392)
AF-A0A1Y5I9G3-F1-model_v4	UDP-galactose transporter related protein	Ostreococcus tauri	1	13.9	0.000431	191	22-408 (414)	5-350 (563)
AF-A0A7S1BQU4-F1-model_v4	Hypothetical protein	Corethron hystrix	1	13.7	0.00209	190	169-414 (414)	2-244 (248)
AF-A0A395RUU2-F1-model_v4	Duf250 domain membrane protein	Fusarium sporotrichioides	1	15.9	0.000531	190	107-410 (414)	10-285 (312)
AF-A0A6B2LF73-F1-model_v4	TPT domain-containing protein	Arcella intermedia	1	14.8	0.00095	189	171-408 (414)	2-252 (252)
AF-A0A534AVY8-F1-model_v4	DMT family transporter	Gammaproteobacteria bacterium	1	12.7	0.00095	189	135-393 (414)	4-290 (296)
AF-A0A1G0ZJI9-F1-model_v4	EamA domain-containing protein	Lentisphaerae bacterium GWF2_52_8	1	10.3	0.00292	189	50-401 (414)	3-299 (300)
AF-A0A813ES55-F1-model_v4	Hypothetical protein	Polarella glacialis	1	12.3	0.000654	189	43-407 (414)	5-321 (351)
AF-A0A1Y5I7X1-F1-model_v4	TPT domain-containing protein	Ostreococcus tauri	1	15	0.000627	188	167-410 (414)	13-248 (273)
AF-A0A7X3GE94-F1-model_v4	EamA family transporter	Paenibacillus sp. MMS18-CY102	1	12.2	0.00185	187	51-395 (414)	2-291 (291)
AF-A0A7L1VFM0-F1-model_v4	S35E3 protein	Sitta europaea	1	10.8	0.00117	187	46-410 (414)	2-301 (303)
AF-I1LFJ5-F1-model_v4	Uncharacterized protein	Glycine max	1	13	0.000397	187	29-412 (414)	17-374 (403)
AF-A0A1W0WNL5-F1-model_v4	Putative thiamine transporter SLC35F3	Hypsibius dujardini	1	18.2	0.000262	187	2-407 (414)	29-404 (409)
AF-A0A1F6AIB7-F1-model_v4	Uncharacterized protein	Candidatus Gottesmanbacteria bacterium RIFCSPLOWO2_01_FULL_43_11b	1	12.3	0.00218	186	50-393 (414)	2-289 (294)
AF-A0A1I7K6V1-F1-model_v4	EamA domain-containing membrane protein RarD	Alicyclobacillus macrosporangiidus	1	11.6	0.00442	186	51-393 (414)	3-296 (297)
AF-A0A7G2IHI4-F1-model_v4	(bread wheat) hypothetical protein	Triticum aestivum	1	11.6	0.000241	186	15-414 (414)	234-605 (645)
AF-A0A6G1C5A1-F1-model_v4	Uncharacterized protein	Oryza meyeriana var. granulata	1	13.6	0.00117	186	28-411 (414)	192-542 (899)
AF-A0A096P900-F1-model_v4	UAA transporter	Ostreococcus tauri	1	13.9	0.000365	184	1-411 (414)	56-419 (424)
AF-A0A4D8YBI5-F1-model_v4	Solute carrier family 35 (Adenosine 3'-phospho 5'-phosphosulfate transporter), member B3	Salvia splendens	1	13.4	0.00138	184	52-392 (414)	23-308 (753)
AF-A0A6H5JBT2-F1-model_v4	PS_pyruv_trans domain-containing protein	Ectocarpus sp. CCAP 1310/34	1	13.2	9.26e-05	184	1-408 (414)	548-956 (956)
AF-A0A7S1BA99-F1-model_v4	Hypothetical protein	Corethron hystrix	1	13.9	0.000509	183	53-408 (414)	7-329 (329)
AF-A9U1U5-F1-model_v4	Predicted protein	Physcomitrium patens	1	11.1	0.00122	183	22-414 (414)	2-358 (369)
AF-A0A194SBP5-F1-model_v4	Uncharacterized protein	Rhodotorula graminis WP1	1	11.4	0.000397	183	1-414 (414)	36-391 (768)
AF-A0A1A9EYQ9-F1-model_v4	EamA domain-containing protein	Marinobacterium aestuarii	1	17.1	0.0015	181	189-414 (414)	4-228 (229)
AF-A0A106QD56-F1-model_v4	EamA domain-containing protein	Burkholderia ubonensis	1	13.3	0.000553	181	51-407 (414)	12-299 (367)
AF-A0A254NHC6-F1-model_v4	EamA family transporter	Saccharibacillus sp. O23	1	13.9	0.000772	180	1-399 (414)	4-325 (335)
AF-A0A1Q8AQX8-F1-model_v4	Uncharacterized protein	Crenarchaeota archaeon 13_1_20CM_2_51_8	1	12.4	0.00461	179	29-386 (414)	5-284 (286)
AF-A0A3M1V497-F1-model_v4	DMT family transporter	Euryarchaeota archaeon	1	12.2	0.00218	179	49-393 (414)	2-284 (287)
AF-B9D4Y3-F1-model_v4	Carboxylate/Amino Acid/Amine Transporter	Campylobacter rectus RM3267	1	16.2	0.00112	179	33-410 (414)	27-343 (343)
AF-A0A5C6FS89-F1-model_v4	EamA-like transporter family protein	Crateriforma conspicua	1	12.5	0.000553	179	3-394 (414)	19-360 (363)
AF-A0A6J3A6D4-F1-model_v4	solute carrier family 35 member E2A isoform X1	Vicugna pacos	1	14.5	0.000509	179	1-376 (414)	15-335 (467)
AF-W7W9R6-F1-model_v4	Carboxylate/amino acid/amine transporter	Methylibium sp. T29	1	17.9	0.00133	178	151-393 (414)	1-236 (246)
AF-A0A536LTN6-F1-model_v4	EamA domain-containing protein	Chloroflexi bacterium	1	14.5	0.00156	178	49-393 (414)	3-286 (290)
AF-A0A6B2L9A1-F1-model_v4	Uncharacterized protein	Arcella intermedia	1	12	0.00144	178	52-412 (414)	14-325 (336)
AF-A0A6B2L801-F1-model_v4	Uncharacterized protein	Arcella intermedia	1	12	0.000322	178	82-404 (414)	6-335 (358)
AF-A0A3Q3GA43-F1-model_v4	Solute carrier family 35 member C2	Labrus bergylta	1	14.4	0.000839	178	76-414 (414)	45-344 (371)
AF-A0A813E7W1-F1-model_v4	Hypothetical protein	Polarella glacialis	1	12.8	0.00317	178	34-402 (414)	95-420 (769)
AF-A0A5C5Y023-F1-model_v4	Uncharacterized protein	Crateriforma conspicua	1	12.5	0.000273	177	1-393 (414)	30-383 (384)
AF-A0A0D2FB86-F1-model_v4	Unplaced genomic scaffold supercont1.2, whole genome shotgun sequence	Fonsecaea pedrosoi CBS 271.37	1	15.6	0.000129	177	38-401 (414)	3-403 (404)
AF-A0A813ES77-F1-model_v4	Hypothetical protein	Polarella glacialis	1	13.3	0.000681	177	1-412 (414)	71-446 (630)
AF-A0A2H0NFL9-F1-model_v4	EamA domain-containing protein	Candidatus Gottesmanbacteria bacterium CG11_big_fil_rev_8_21_14_0_20_37_11	1	11.1	0.00258	176	51-396 (414)	3-284 (287)
AF-A0A4R6VU64-F1-model_v4	Uncharacterized protein	Maritalea mobilis	1	11	0.00247	176	47-393 (414)	4-282 (293)
AF-A0A2G6FGV9-F1-model_v4	Uncharacterized protein	Desulfobacterales bacterium	1	13.3	0.000336	175	47-394 (414)	3-291 (292)
AF-A0A2V9W7J9-F1-model_v4	EamA domain-containing protein	Acidobacteria bacterium	1	13.7	0.00071	175	46-413 (414)	4-317 (335)
AF-A0A1Y2FRJ3-F1-model_v4	UAA transporter	Neocallimastix californiae	1	13	0.00359	174	153-407 (414)	39-305 (315)
AF-G7EAR0-F1-model_v4	TPT domain-containing protein	Mixia osmundae IAM 14324	1	11.8	0.000309	174	1-392 (414)	30-405 (410)
AF-A0A813ETH4-F1-model_v4	Hypothetical protein	Polarella glacialis	1	9.9	0.00127	174	24-413 (414)	5-360 (512)
AF-A0A0A8B8I3-F1-model_v4	Uncharacterized protein	Berryella intestinalis	1	10.6	0.00209	173	80-393 (414)	2-257 (288)
AF-A0A7S0Q4B1-F1-model_v4	Hypothetical protein	Coccolithus braarudii	1	13.3	0.000627	173	1-414 (414)	25-369 (398)
AF-A0A2D5CLY8-F1-model_v4	EamA domain-containing protein	Marinovum sp.	1	11.6	0.0115	172	50-396 (414)	2-281 (282)
AF-A0A118K4R7-F1-model_v4	Uncharacterized protein	Cynara cardunculus var. scolymus	1	16.6	0.00163	172	169-392 (414)	119-310 (314)
AF-A0A3D8SEV4-F1-model_v4	UDP-galactose transporter	Coleophoma cylindrospora	1	12.9	0.000231	172	44-407 (414)	13-408 (827)
AF-A0A7S0Q2R4-F1-model_v4	Hypothetical protein	Coccolithus braarudii	1	11.9	0.000431	171	31-414 (414)	1-353 (390)
AF-A0A0D2DKB6-F1-model_v4	Unplaced genomic scaffold supercont1.5, whole genome shotgun sequence	Fonsecaea pedrosoi CBS 271.37	1	12.7	0.00035	171	1-407 (414)	41-470 (527)
AF-A0A2H6A8A7-F1-model_v4	Uncharacterized protein	bacterium HR34	1	14.1	0.00317	168	50-395 (414)	2-304 (305)
AF-G7DST5-F1-model_v4	Uncharacterized protein	Mixia osmundae IAM 14324	1	12.3	0.000654	168	6-407 (414)	13-355 (362)
AF-A0A286UFW6-F1-model_v4	TPT-domain-containing	Pyrrhoderma noxium	1	11.9	0.000805	168	9-414 (414)	2-376 (417)
AF-A0A067QV19-F1-model_v4	Solute carrier family 35 member C2	Zootermopsis nevadensis	1	13.6	0.000911	168	123-407 (414)	111-434 (500)
AF-A0A7R9EP50-F1-model_v4	Hypothetical protein	Timema bartmani	1	11.8	0.000322	168	23-413 (414)	149-492 (533)
AF-A0A5C6FN63-F1-model_v4	Uncharacterized protein	Crateriforma conspicua	1	14.6	0.00228	167	168-393 (414)	44-276 (278)
AF-A0A2I2UUM2-F1-model_v4	Solute carrier family 35 member B2	Felis catus	1	11	0.0017	167	1-414 (414)	118-465 (467)
AF-A0A243DYC0-F1-model_v4	Multidrug transporter	Bacillus thuringiensis serovar darmstadiensis	1	15.4	0.00304	165	167-414 (414)	19-258 (260)
AF-A0A4R6G2T2-F1-model_v4	EamA-like transporter family protein	Salegentibacter sp. 24	1	10.4	0.00269	164	84-396 (414)	2-261 (262)
AF-C1LHB8-F1-model_v4	GDP-fucose transporter	Schistosoma japonicum	1	14.9	0.00825	164	185-414 (414)	4-227 (277)
AF-A0A7Y7QJS7-F1-model_v4	Uncharacterized protein	Candidatus Gracilibacteria bacterium	1	16.2	0.00501	164	47-396 (414)	2-287 (289)
AF-C6TAJ9-F1-model_v4	TPT domain-containing protein	Glycine max	1	12.8	0.00617	163	32-344 (414)	1-249 (250)
AF-A0A7Y3IAM0-F1-model_v4	DMT family transporter	Gemmatimonadetes bacterium	1	16	0.0312	162	51-340 (414)	5-231 (237)
AF-A0A819KEC6-F1-model_v4	Hypothetical protein	Adineta steineri	1	14.3	0.00163	162	170-414 (414)	18-282 (288)
AF-A0A353B3V7-F1-model_v4	Uncharacterized protein	Planctomycetaceae bacterium	1	12.8	0.00292	162	51-397 (414)	23-314 (315)
AF-A0A094PX37-F1-model_v4	Uncharacterized protein	freshwater metagenome	1	14	0.00568	161	65-394 (414)	2-292 (296)
AF-C1LF09-F1-model_v4	Solute carrier family 35 member B1	Schistosoma japonicum	1	13	0.00391	160	48-408 (414)	5-327 (327)
AF-A0A382N1F8-F1-model_v4	EamA domain-containing protein	marine metagenome	1	11.6	0.00643	159	51-393 (414)	4-285 (289)
AF-A0A7H4LFW2-F1-model_v4	Genome assembly, chromosome: II	Triticum aestivum	1	16.2	0.000153	159	107-394 (414)	42-317 (321)
AF-A0A1B0CE68-F1-model_v4	Putative solute carrier family 35 member f2-like trichogramma pretiosum	Lutzomyia longipalpis	1	17	0.0154	158	171-414 (414)	2-240 (248)
AF-A0A813EWY6-F1-model_v4	Hypothetical protein	Polarella glacialis	1	11.2	0.00177	157	169-414 (414)	19-278 (280)
AF-A0A6B2L7R3-F1-model_v4	Uncharacterized protein	Arcella intermedia	1	12	0.000839	157	44-393 (414)	3-291 (371)
AF-A0A453LAM5-F1-model_v4	Uncharacterized protein	Aegilops tauschii subsp. strangulata	1	12.5	0.0136	156	23-318 (414)	1-222 (222)
AF-F8KXL4-F1-model_v4	EamA domain-containing protein	Parachlamydia acanthamoebae UV-7	1	13	0.00974	156	56-404 (414)	2-300 (301)
AF-A0A182NSN4-F1-model_v4	MMS19 nucleotide excision repair protein	Anopheles dirus	1	14.2	0.00247	156	80-413 (414)	32-340 (1268)
AF-I1M629-F1-model_v4	Uncharacterized protein	Glycine max	1	15.4	0.00247	155	125-393 (414)	8-259 (266)
AF-A0A096PBD7-F1-model_v4	Triose-phosphate transporter domain	Ostreococcus tauri	1	10.6	0.0136	155	80-407 (414)	1-271 (274)
AF-A0A813E495-F1-model_v4	Hypothetical protein	Polarella glacialis	1	15.3	0.00331	155	29-359 (414)	1-330 (331)
AF-A0A1F6DXL5-F1-model_v4	EamA domain-containing protein	Candidatus Kaiserbacteria bacterium RIFCSPHIGHO2_02_FULL_55_20	1	12.3	0.000911	154	81-396 (414)	3-303 (307)
AF-A0A4D8YFV8-F1-model_v4	Solute carrier family 35 (UDP-sugar transporter), member A1/2/3	Salvia splendens	1	11.7	0.00117	154	12-414 (414)	15-361 (429)
AF-A0A7S1Y487-F1-model_v4	Hypothetical protein	Grammatophora oceanica	1	11	0.00424	153	1-398 (414)	66-410 (460)
AF-A0A7J9XJK3-F1-model_v4	EamA-like transporter family protein	Pseudonocardiaceae bacterium	1	13.8	0.0067	152	1-395 (414)	2-325 (340)
AF-A6D399-F1-model_v4	Uncharacterized protein	Vibrio mediterranei AK1	1	15.3	0.0086	148	167-413 (414)	4-232 (244)
AF-A0A7J3KHV6-F1-model_v4	EamA domain-containing protein	Staphylothermus marinus	1	13.7	0.0276	148	30-339 (414)	15-247 (248)
AF-A0A7J4J447-F1-model_v4	EamA family transporter	Candidatus Woesearchaeota archaeon	1	13.2	0.0215	147	41-342 (414)	7-224 (229)
AF-A0A090M1C7-F1-model_v4	Nucleotide-sugar transporter	Ostreococcus tauri	1	12.5	0.0102	147	24-392 (414)	1-304 (317)
AF-A0A1W0WQN0-F1-model_v4	Solute carrier family 35 member B1	Hypsibius dujardini	1	12.8	0.00127	146	1-396 (414)	102-437 (438)
AF-A0A0K8LE80-F1-model_v4	Probable sugar phosphate/phosphate translocator At4g32390	Aspergillus udagawae	1	13.7	0.00792	146	81-407 (414)	371-650 (661)
AF-A0A7R9EUW5-F1-model_v4	Hypothetical protein	Timema bartmani	1	10.4	0.00643	146	1-414 (414)	449-893 (932)
AF-A0A1Y2ECB6-F1-model_v4	TPT-domain-containing protein	Neocallimastix californiae	1	10	0.012	140	61-414 (414)	3-309 (376)
AF-A0A531B1X4-F1-model_v4	DMT family transporter	Mesorhizobium sp.	1	15	0.113	133	198-401 (414)	2-194 (195)
AF-A0A6J3A952-F1-model_v4	solute carrier family 35 member E2A isoform X5	Vicugna pacos	1	14	0.0198	133	1-330 (414)	15-291 (334)
AF-A0A1Q3F9J9-F1-model_v4	Putative adenosine 3'-phospho 5'-phosphosulfate transporter 1	Culex tarsalis	1	11.6	0.00424	133	15-413 (414)	127-467 (477)
AF-A0A382N5A1-F1-model_v4	EamA domain-containing protein	marine metagenome	1	13.8	0.134	132	53-302 (414)	13-204 (205)
AF-A0A150H3U8-F1-model_v4	EamA domain-containing protein	Gonium pectorale	1	12.9	0.011	129	137-396 (414)	351-722 (723)
AF-A0A4V5NEE2-F1-model_v4	TPT domain-containing protein	Friedmanniomyces simplex	1	11.8	0.012	125	1-414 (414)	2-359 (641)
AF-A0A096PBG4-F1-model_v4	Uncharacterized protein	Ostreococcus tauri	1	12.6	0.0454	124	58-403 (414)	2-289 (715)
AF-A0A531K1Z5-F1-model_v4	DMT family transporter	Mesorhizobium sp.	1	25.4	0.151	122	168-277 (414)	30-129 (129)
AF-A0A1I6RVC3-F1-model_v4	EamA-like transporter family protein	Paenibacillus sp. BC26	1	13.8	0.00407	122	167-411 (414)	10-263 (263)
AF-A0A6J3AA51-F1-model_v4	solute carrier family 35 member B1 isoform X2	Vicugna pacos	1	14.7	0.0514	121	166-414 (414)	77-313 (314)
AF-A0A813ET63-F1-model_v4	Hypothetical protein	Polarella glacialis	1	15.6	0.0325	118	65-332 (414)	22-266 (282)
AF-A0A3Q7S7U7-F1-model_v4	solute carrier family 35 member F2 isoform X3	Callorhinus ursinus	1	12.7	0.016	118	58-414 (414)	2-264 (358)
AF-G7DUR1-F1-model_v4	Sulfotransfer_1 domain-containing protein	Mixia osmundae IAM 14324	1	11.5	0.0687	118	1-398 (414)	31-391 (760)
AF-A0A7S0Q0D2-F1-model_v4	Hypothetical protein	Coccolithus braarudii	1	12.2	0.0243	117	46-398 (414)	50-374 (403)
AF-A0A6B2L2J6-F1-model_v4	Uncharacterized protein	Arcella intermedia	1	12.4	0.0959	117	51-414 (414)	4-304 (495)
AF-A0A433DD02-F1-model_v4	EamA domain-containing protein	Jimgerdemannia flammicorona	1	12.3	0.0999	112	1-326 (414)	6-281 (393)
AF-A0A645H998-F1-model_v4	Putative inner membrane transporter YedA	bioreactor metagenome	1	8.8	0.118	109	213-414 (414)	2-210 (210)
AF-A0A6I2Y1W8-F1-model_v4	Uncharacterized protein	Actinomycetia bacterium	1	11.3	0.158	107	48-397 (414)	6-310 (332)
AF-A0A2N1TTJ4-F1-model_v4	EamA domain-containing protein	Planctomycetes bacterium HGW-Planctomycetes-1	1	13.6	0.211	103	86-316 (414)	34-218 (225)
AF-A0A453IBQ6-F1-model_v4	TPT domain-containing protein	Aegilops tauschii subsp. strangulata	1	15.5	0.104	102	165-413 (414)	96-320 (364)
AF-A0A2V9ICB5-F1-model_v4	EamA domain-containing protein	Acidobacteria bacterium	1	11.3	0.527	98	24-290 (414)	1-205 (207)
AF-A0A3D1DIX3-F1-model_v4	EamA/RhaT family transporter	Planctomycetaceae bacterium	1	13.3	0.151	98	166-393 (414)	2-228 (230)
AF-A0A2N1QM98-F1-model_v4	EamA domain-containing protein	Synergistetes bacterium HGW-Synergistetes-2	1	16.5	1.49	95	167-293 (414)	71-193 (195)
AF-A0A7L3IPJ8-F1-model_v4	S35F1 protein	Pardalotus punctatus	1	14.5	0.943	93	71-297 (414)	26-202 (208)
AF-A0A2I2UGK9-F1-model_v4	Solute carrier family 35 member F3	Felis catus	1	15.8	0.128	93	137-407 (414)	171-457 (488)
AF-A0A6P5NQL3-F1-model_v4	WAT1-related protein	Arachis duranensis	1	15.5	0.0435	91	168-414 (414)	4-268 (273)
AF-A0A242M385-F1-model_v4	Permease of the drug/metabolite transporter (DMT) superfamily	Caballeronia sordidicola	0.98	14.4	1.37	79	94-306 (414)	8-190 (191)
AF-A0A7G1I9Y5-F1-model_v4	MFS domain-containing protein	Mycobacterium kansasii	0.96	13.9	0.123	74	124-413 (414)	5-291 (343)
AF-A0A087SQN4-F1-model_v4	Uncharacterized protein	Auxenochlorella protothecoides	0.95	13.1	0.428	72	22-411 (414)	1-276 (557)
AF-A0A4Z2F8Y7-F1-model_v4	Transmembrane protein 144	Liparis tanakae	0.9	10.1	0.465	67	6-395 (414)	1-334 (337)

## Sheet: GMGCL_ID
Target	Prob.	Seq. Id.	E-Value	Score	Query Pos.	Target Pos.
GMGC10.027_564_349.BMUL_2554_trun_0	1	13.1	0.00485	166	51-395 (414)	2-252 (253)
GMGC10.043_375_500.UNKNOWN_trun_0	1	15.3	0.00943	132	194-411 (414)	1-225 (253)
GMGC10.033_717_239.UNKNOWN_trun_0	1	12.3	0.153	111	49-341 (414)	4-240 (253)
GMGC10.004_469_799.UNKNOWN_trun_0	1	17.7	0.0477	95	82-329 (414)	6-225 (228)
GMGC10.250_993_172.UNKNOWN_trun_0	0.99	14	0.741	84	125-279 (414)	83-213 (218)
GMGC10.202_766_644.YDED_trun_0	0.98	13.7	0.285	79	34-297 (414)	15-251 (253)
GMGC10.188_341_488.UNKNOWN_trun_0	0.97	15.3	0.18	77	95-343 (414)	6-213 (253)
GMGC10.007_182_733.UNKNOWN_trun_1	0.87	11.9	1.38	65	1-317 (414)	2-236 (253)
GMGC10.083_646_476.UNKNOWN_trun_0	0.63	11.1	6.17	55	32-297 (414)	3-193 (195)
GMGC10.044_082_170.GLYA_trun_0	0.51	13.8	0.951	51	140-363 (414)	6-232 (233)
GMGC10.275_765_728.ENC_03340_trun_1	0.41	12.8	0.741	48	167-395 (414)	22-252 (253)
GMGC10.005_514_142.EMRB_trun_1	0.35	12.2	1.12	46	133-363 (414)	6-252 (253)
GMGC10.046_195_457.EMRB_trun_0	0.33	12.5	1.5	45	135-387 (414)	5-252 (253)
GMGC10.146_777_408.UNKNOWN_trun_0	0.25	15.2	2.37	42	167-342 (414)	48-225 (253)
GMGC10.041_317_886.UNKNOWN_trun_0	0.23	12.1	2.8	41	147-343 (414)	1-216 (239)
GMGC10.169_396_069.PROP2_trun_0	0.23	12.3	3.6	41	167-346 (414)	32-232 (244)
GMGC10.304_115_338.UNKNOWN_trun_2	0.21	9.3	2.92	40	167-408 (414)	3-253 (253)
GMGC10.034_759_286.UNKNOWN_trun_0	0.2	10.6	4.08	39	167-412 (414)	6-223 (223)
GMGC10.167_652_854.NORB_trun_0	0.18	12.5	2.92	38	167-389 (414)	7-227 (232)
GMGC10.032_097_090.PROP_trun_1	0.18	11.6	3.75	38	140-377 (414)	3-250 (253)
GMGC10.034_933_169.NORB_trun_0	0.18	10.5	3.91	38	167-393 (414)	23-252 (253)
GMGC10.139_483_355.UNKNOWN_trun_1	0.18	12.2	2.92	38	167-393 (414)	24-252 (253)
GMGC10.304_115_338.UNKNOWN_trun_1	0.18	11.8	3.45	38	167-376 (414)	9-223 (253)
GMGC10.042_033_338.UNKNOWN_trun_0	0.16	10.4	3.91	37	167-346 (414)	10-175 (208)
GMGC10.005_408_382.SCLAV_4823_trun_0	0.16	9	4.43	37	144-386 (414)	1-250 (253)
GMGC10.190_247_862.SLC22A2_trun_0	0.12	14.9	6.71	33	167-339 (414)	3-164 (239)
GMGC10.013_889_640.YCAD_trun_0	0.09	12.5	9.76	30	167-339 (414)	12-172 (175)

## Sheet: MGNIFY_ESM30
Target	Prob.	Seq. Id.	E-Value	Score	Query Pos.	Target Pos.
MGYP001503068933	1	19.2	7.76e-12	491	24-401 (414)	1-406 (407)
MGYP001054299073	1	16.4	5.08e-09	465	48-398 (414)	3-289 (290)
MGYP000314666247	1	15.1	2.57e-08	445	46-394 (414)	4-291 (295)
MGYP002858173687	1	13	2.47e-08	439	47-399 (414)	7-298 (299)
MGYP000048066028	1	10.9	1.84e-08	430	44-402 (414)	6-314 (315)
MGYP000580123451	1	17.6	1.22e-08	425	50-394 (414)	13-299 (301)
MGYP000173801282	1	14.5	3.74e-08	422	50-395 (414)	2-286 (287)
MGYP003614603387	1	14.2	3.58e-08	421	46-404 (414)	3-295 (296)
MGYP001453737574	1	17.2	1.7e-08	415	44-401 (414)	4-286 (289)
MGYP001445419845	1	11.9	7.9e-08	414	51-408 (414)	5-299 (299)
MGYP000038171772	1	13.2	6.97e-08	413	44-400 (414)	3-303 (307)
MGYP001766205930	1	13.1	3.58e-08	410	47-402 (414)	2-301 (305)
MGYP001775315986	1	11.7	1.6e-07	403	46-392 (414)	4-279 (284)
MGYP001348624155	1	14.5	2.14e-07	403	44-400 (414)	3-293 (294)
MGYP000100196872	1	11.2	1.06e-07	402	24-394 (414)	1-297 (299)
MGYP000164657170	1	13.1	4.23e-08	401	22-393 (414)	3-297 (308)
MGYP001405750424	1	14.1	1.97e-07	399	46-398 (414)	4-299 (300)
MGYP000147269745	1	14.5	1.35e-07	398	50-395 (414)	2-291 (298)
MGYP001048324039	1	16.4	6.69e-08	396	51-408 (414)	5-297 (297)
MGYP000062446091	1	15	5.76e-09	396	1-414 (414)	57-417 (423)
MGYP000919465357	1	14.7	6.69e-08	393	44-394 (414)	3-284 (294)
MGYP000096462917	1	14.2	1.97e-07	392	43-394 (414)	5-297 (313)
MGYP000162013350	1	16.9	4.16e-07	391	50-395 (414)	5-283 (284)
MGYP000088297237	1	15.1	9.72e-08	387	47-414 (414)	6-310 (316)
MGYP000335793483	1	13.2	3.58e-08	386	49-412 (414)	8-317 (317)
MGYP000164960616	1	14.7	5.43e-08	384	48-398 (414)	3-305 (311)
MGYP000338809715	1	15.8	3.58e-08	382	33-414 (414)	66-377 (383)
MGYP000588755832	1	15.2	2.33e-07	381	48-414 (414)	3-292 (292)
MGYP001817557583	1	16.2	2.86e-07	380	50-394 (414)	2-286 (288)
MGYP000011615568	1	13.4	3.68e-07	380	54-414 (414)	3-298 (298)
MGYP000066359022	1	16.8	9.72e-08	379	33-396 (414)	4-291 (292)
MGYP000195901852	1	16.2	1.6e-07	379	53-394 (414)	10-288 (297)
MGYP001245408223	1	11.5	4.72e-07	378	47-402 (414)	5-289 (290)
MGYP000686215266	1	14.3	6.31e-07	378	45-414 (414)	3-299 (299)
MGYP001212100862	1	13.2	1.97e-07	377	44-395 (414)	5-288 (292)
MGYP001587120364	1	17.4	6.97e-08	377	46-395 (414)	5-297 (301)
MGYP001159352246	1	14.6	2.14e-07	377	50-407 (414)	5-306 (311)
MGYP000076656251	1	12.8	3.38e-07	376	48-412 (414)	3-297 (298)
MGYP003645835085	1	13.6	2.99e-07	375	53-406 (414)	5-295 (298)
MGYP002290002144	1	16.1	1.35e-07	374	46-404 (414)	10-307 (308)
MGYP000322761247	1	14	1.06e-07	373	47-411 (414)	5-302 (303)
MGYP000179555636	1	13.8	5.9e-08	373	1-406 (414)	1-347 (348)
MGYP000029300077	1	13.5	1.3e-07	372	44-398 (414)	4-301 (302)
MGYP000284523754	1	14.6	3.53e-07	372	44-393 (414)	4-291 (303)
MGYP000648497331	1	12.3	5.66e-08	372	44-404 (414)	4-325 (327)
MGYP003566621545	1	16.3	5.43e-08	371	47-396 (414)	3-290 (291)
MGYP000151761816	1	13.8	1.41e-07	371	43-414 (414)	5-312 (313)
MGYP000265564459	1	13.2	1.3e-07	371	41-413 (414)	2-313 (318)
MGYP000321369876	1	16.2	4.41e-08	371	33-407 (414)	13-334 (336)
MGYP000164964253	1	18.7	2.05e-07	370	51-395 (414)	2-284 (286)
MGYP002603756041	1	12.4	2.91e-08	370	31-409 (414)	1-309 (326)
MGYP000506710801	1	12.8	2.33e-07	369	46-403 (414)	23-334 (338)
MGYP000093514702	1	12.2	2.14e-07	368	23-390 (414)	1-323 (325)
MGYP003977637657	1	13.4	3.68e-07	367	47-397 (414)	4-292 (296)
MGYP000451072175	1	11.2	2.05e-07	367	51-407 (414)	11-307 (310)
MGYP000171325165	1	14.1	7.57e-08	366	47-408 (414)	4-296 (296)
MGYP001020071400	1	16.1	7.15e-07	366	51-394 (414)	3-287 (297)
MGYP000429255573	1	14.3	4.53e-07	366	51-394 (414)	5-281 (297)
MGYP000080905606	1	16	1.84e-08	366	15-409 (414)	4-339 (347)
MGYP000142888429	1	11.6	9.97e-07	365	50-393 (414)	2-293 (296)
MGYP000339062541	1	15.2	9.56e-07	364	50-396 (414)	2-298 (299)
MGYP003385077458	1	16.4	1.35e-07	364	46-411 (414)	4-311 (311)
MGYP001195933116	1	14.6	2.53e-07	363	44-402 (414)	2-293 (294)
MGYP000936054212	1	15.6	8.23e-08	363	23-394 (414)	3-305 (311)
MGYP000061454119	1	20.8	1.17e-08	363	49-401 (414)	18-331 (335)
MGYP003945681649	1	16.2	8.23e-08	361	49-404 (414)	3-291 (293)
MGYP000530688060	1	15.3	5.13e-07	361	46-414 (414)	5-303 (303)
MGYP003631431208	1	14.5	7.15e-07	360	48-394 (414)	14-293 (294)
MGYP001148721798	1	14.4	1.53e-07	359	46-389 (414)	2-285 (286)
MGYP000503316792	1	15.3	4.23e-08	359	45-410 (414)	3-304 (304)
MGYP001797126752	1	12.4	3.83e-07	359	22-408 (414)	1-307 (307)
MGYP002348046837	1	12.9	4.92e-07	359	48-401 (414)	16-309 (310)
MGYP001298270404	1	12.6	4.92e-07	359	47-411 (414)	3-313 (313)
MGYP001606605404	1	13.7	6.86e-07	358	47-393 (414)	4-286 (298)
MGYP000037970221	1	15.3	3.83e-07	358	44-412 (414)	6-299 (300)
MGYP001667881701	1	15	9.72e-08	358	46-405 (414)	3-304 (305)
MGYP001351507780	1	17.7	5e-08	358	35-403 (414)	3-309 (310)
MGYP000334572244	1	15	1.89e-07	358	49-407 (414)	10-317 (321)
MGYP001828207639	1	15	1.13e-06	357	51-410 (414)	9-313 (319)
MGYP001454405193	1	17.3	4.72e-07	355	59-394 (414)	2-276 (282)
MGYP000666252276	1	16.9	1.81e-07	355	46-399 (414)	2-291 (293)
MGYP002633145765	1	14.3	2.53e-07	354	31-390 (414)	1-299 (300)
MGYP000326467105	1	11.8	1.04e-06	354	51-392 (414)	15-292 (308)
MGYP003583913910	1	12.4	1.45e-06	353	51-401 (414)	5-289 (291)
MGYP001433710660	1	15.8	1.06e-07	353	47-394 (414)	3-286 (292)
MGYP003949776603	1	15.5	7.15e-07	353	49-400 (414)	10-295 (296)
MGYP000276173709	1	14.5	8.94e-08	353	44-408 (414)	3-306 (306)
MGYP000191153149	1	13.1	2.75e-07	353	34-414 (414)	10-320 (320)
MGYP000145835836	1	15.9	4.6e-08	353	48-411 (414)	10-321 (322)
MGYP000043375949	1	13.2	8.8e-07	353	31-413 (414)	1-319 (324)
MGYP000836863794	1	14	2.86e-07	353	45-414 (414)	2-321 (339)
MGYP000928633005	1	12.2	3.38e-07	352	47-404 (414)	3-289 (291)
MGYP000579649023	1	17.2	3.11e-07	352	51-398 (414)	6-292 (302)
MGYP000079454897	1	14.4	4.06e-08	352	24-408 (414)	1-322 (322)
MGYP001432878254	1	12.8	5.57e-07	351	50-393 (414)	4-293 (296)
MGYP001655880051	1	13.6	8.44e-07	351	48-402 (414)	10-299 (300)
MGYP002777032998	1	16.9	3.3e-08	351	47-406 (414)	17-322 (323)
MGYP000060686105	1	11.9	2.11e-06	350	38-397 (414)	2-289 (290)
MGYP000078772249	1	14	2.39e-06	350	51-394 (414)	9-290 (292)
MGYP000007180990	1	14.1	1.23e-06	350	47-395 (414)	3-298 (299)
MGYP003286153532	1	12	2.11e-06	349	53-397 (414)	2-280 (281)
MGYP000265444416	1	15.4	9.32e-08	349	47-407 (414)	3-306 (310)
MGYP000070421719	1	11.1	3.11e-07	349	24-407 (414)	1-308 (320)
MGYP000089838614	1	16	7.57e-08	349	44-411 (414)	7-362 (378)
MGYP001069233900	1	16.9	2.33e-07	348	46-393 (414)	4-290 (293)
MGYP000332968090	1	17.1	1.06e-07	348	47-413 (414)	3-292 (301)
MGYP000655927279	1	14.6	3.38e-07	348	44-414 (414)	3-309 (309)
MGYP000159073325	1	15	8.58e-08	348	44-414 (414)	6-308 (314)
MGYP003452310533	1	13.6	1.78e-06	347	53-397 (414)	2-291 (292)
MGYP000502636372	1	14.7	1.23e-06	347	50-407 (414)	7-296 (311)
MGYP000145026598	1	14.1	8.94e-08	347	44-413 (414)	3-315 (315)
MGYP001431327749	1	11.9	1.86e-06	347	50-414 (414)	18-323 (326)
MGYP001008763440	1	15.9	3.24e-07	346	51-394 (414)	3-290 (291)
MGYP000093883717	1	11.8	1.18e-06	346	46-405 (414)	3-293 (294)
MGYP000309565879	1	12.1	1.39e-06	346	51-407 (414)	11-305 (312)
MGYP000000188278	1	13.6	9.17e-07	345	46-397 (414)	3-295 (296)
MGYP003344577713	1	18	5e-08	345	44-394 (414)	3-294 (298)
MGYP000837512286	1	14.3	1.47e-07	345	31-394 (414)	1-304 (315)
MGYP000287795962	1	11.5	1.78e-06	344	53-395 (414)	2-288 (290)
MGYP003294044784	1	17	1.6e-07	344	47-408 (414)	3-307 (307)
MGYP000320568143	1	13.4	9.56e-07	343	50-394 (414)	2-290 (293)
MGYP000461438939	1	14.8	2.14e-07	343	47-414 (414)	8-295 (296)
MGYP000146601680	1	15.5	9.17e-07	343	53-393 (414)	9-294 (298)
MGYP000342223151	1	15.2	1.67e-07	343	45-407 (414)	3-298 (308)
MGYP001031135151	1	13.6	2.29e-06	343	53-414 (414)	7-310 (310)
MGYP000137047325	1	12.7	2.33e-07	343	32-408 (414)	1-318 (318)
MGYP000333179031	1	14.2	6.41e-08	343	13-408 (414)	1-334 (334)
MGYP000320658632	1	13.3	4.72e-07	342	51-414 (414)	3-286 (286)
MGYP000430655477	1	14.2	2.82e-06	342	47-394 (414)	5-289 (293)
MGYP000977863285	1	13.7	2.53e-07	342	31-393 (414)	1-304 (305)
MGYP000340534163	1	16.5	2.53e-07	342	49-398 (414)	14-317 (318)
MGYP001363761402	1	13.8	1.41e-07	342	23-407 (414)	1-359 (363)
MGYP003289959910	1	14	7.77e-07	341	47-399 (414)	2-289 (290)
MGYP001069548037	1	13.5	1.64e-06	341	53-394 (414)	2-282 (291)
MGYP001159751702	1	14.5	2.23e-07	341	51-400 (414)	7-292 (293)
MGYP000718201474	1	11.4	2.94e-06	341	46-394 (414)	7-295 (299)
MGYP000504840776	1	16.5	8.23e-08	341	47-404 (414)	3-301 (303)
MGYP000515990296	1	13.9	6.58e-07	341	48-395 (414)	6-300 (304)
MGYP000183348568	1	16.2	5e-08	341	47-414 (414)	4-320 (321)
MGYP000085349078	1	17.9	9.32e-08	341	39-414 (414)	8-316 (325)
MGYP000903225789	1	15.4	1.6e-07	341	51-412 (414)	6-304 (333)
MGYP000193345787	1	11.8	1.06e-07	341	28-413 (414)	40-378 (419)
MGYP000320654384	1	14.5	4.16e-07	340	48-395 (414)	4-286 (287)
MGYP000100094506	1	13.8	4.53e-07	340	50-405 (414)	3-289 (292)
MGYP000877786901	1	12.3	7.15e-07	340	47-403 (414)	3-290 (293)
MGYP000383306087	1	13.7	2.39e-06	340	51-408 (414)	4-299 (299)
MGYP000314256164	1	14.6	1.78e-06	340	44-395 (414)	3-298 (299)
MGYP000480024870	1	13.3	1.89e-07	340	46-401 (414)	3-299 (300)
MGYP000624390468	1	14.4	8.94e-08	340	45-405 (414)	5-306 (306)
MGYP000332371048	1	13.5	5.81e-07	340	46-414 (414)	16-305 (308)
MGYP000064838325	1	12.8	1.18e-06	340	31-407 (414)	1-307 (314)
MGYP000145909380	1	15.6	4.72e-07	339	51-393 (414)	2-273 (277)
MGYP000338939357	1	15.7	6.58e-07	339	28-394 (414)	7-289 (290)
MGYP003590375672	1	14.7	9.17e-07	339	56-407 (414)	2-294 (296)
MGYP003575743768	1	13.9	1.33e-06	339	42-394 (414)	4-296 (302)
MGYP000173814729	1	13.2	2.29e-06	339	46-394 (414)	4-303 (305)
MGYP001562203345	1	14.8	6.58e-07	339	28-395 (414)	1-304 (306)
MGYP000057372776	1	13.8	4.53e-07	339	28-411 (414)	1-304 (308)
MGYP000070453194	1	16.6	5.34e-07	339	50-402 (414)	22-314 (315)
MGYP001304132547	1	14.6	1.45e-06	338	47-395 (414)	3-281 (288)
MGYP001760874499	1	14.7	1.33e-06	338	46-399 (414)	11-289 (290)
MGYP001099492084	1	15.9	3.38e-07	338	46-393 (414)	2-287 (292)
MGYP000327281086	1	14.4	4.92e-07	338	51-403 (414)	6-297 (298)
MGYP003556899039	1	15.6	6.58e-07	338	37-393 (414)	2-295 (298)
MGYP000079449113	1	12.1	4.92e-07	338	29-396 (414)	1-300 (305)
MGYP000318039531	1	13	2.29e-06	338	51-414 (414)	2-304 (305)
MGYP002725588693	1	12.9	4.1e-06	337	50-400 (414)	4-291 (292)
MGYP000176754484	1	14	1.45e-06	337	45-394 (414)	2-293 (297)
MGYP000325919488	1	13.6	2.53e-07	337	44-394 (414)	3-299 (303)
MGYP000667030140	1	13.1	2.14e-07	337	47-403 (414)	3-308 (309)
MGYP000172590560	1	15.7	9.72e-08	337	11-407 (414)	1-328 (352)
MGYP000448038681	1	17.5	2.75e-07	336	47-396 (414)	2-291 (292)
MGYP000264148427	1	12.6	6.31e-07	336	36-400 (414)	4-302 (303)
MGYP000099787732	1	14.6	2.11e-06	336	50-399 (414)	9-302 (303)
MGYP000948604435	1	14.3	1.45e-06	336	49-411 (414)	4-305 (305)
MGYP000341270720	1	13.6	2.39e-06	336	51-409 (414)	3-298 (307)
MGYP000081788791	1	11.9	8.1e-07	336	26-414 (414)	1-315 (315)
MGYP000146962320	1	12.6	1.94e-06	335	47-407 (414)	3-288 (290)
MGYP000183385279	1	14.2	8.44e-07	335	31-414 (414)	1-297 (298)
MGYP000157993579	1	14.6	4.34e-07	335	48-399 (414)	9-305 (307)
MGYP002624217797	1	13.9	7.77e-07	335	42-411 (414)	4-311 (311)
MGYP000039352783	1	11.9	1.97e-07	335	47-400 (414)	50-333 (338)
MGYP000188438816	1	14.9	8.58e-08	335	1-414 (414)	1-374 (374)
MGYP000036850779	1	16.8	1.1e-07	334	46-393 (414)	6-290 (294)
MGYP003515992025	1	14.5	7.77e-07	334	47-398 (414)	3-295 (296)
MGYP001430872949	1	12.2	1.13e-06	334	44-408 (414)	5-296 (296)
MGYP002640407009	1	16.2	4.34e-07	334	47-398 (414)	4-296 (297)
MGYP001068889339	1	13.8	3.06e-06	334	44-393 (414)	4-296 (298)
MGYP001017170481	1	15.6	1.67e-07	334	44-395 (414)	5-293 (306)
MGYP000473913563	1	13.7	3.19e-06	334	51-414 (414)	13-315 (315)
MGYP000337603213	1	14.8	1.57e-06	333	50-407 (414)	2-305 (309)
MGYP001093369513	1	13.8	1.51e-06	332	51-393 (414)	2-286 (288)
MGYP001282662398	1	13.6	9.97e-07	332	47-412 (414)	3-314 (314)
MGYP000149026721	1	11.8	1.71e-06	332	27-413 (414)	6-328 (380)
MGYP000160944809	1	13.5	6.31e-07	331	46-408 (414)	4-298 (299)
MGYP000073575039	1	10.2	1.08e-06	331	17-412 (414)	2-320 (321)
MGYP003419365645	1	12.2	1.39e-06	330	51-394 (414)	2-288 (289)
MGYP000568768863	1	14.9	6.86e-07	330	48-397 (414)	5-290 (291)
MGYP000145779178	1	13.1	7.15e-07	330	47-395 (414)	3-297 (298)
MGYP001124775556	1	14.3	1.64e-06	330	41-407 (414)	2-296 (298)
MGYP000984796854	1	16.2	6.05e-07	330	51-403 (414)	7-297 (299)
MGYP000137113142	1	14.3	6.58e-07	330	6-396 (414)	1-331 (352)
MGYP001343657091	1	13.7	4.72e-07	329	41-403 (414)	2-295 (296)
MGYP002632323613	1	13.2	7.77e-07	329	44-394 (414)	7-295 (297)
MGYP002776429745	1	12.2	3.33e-06	329	51-414 (414)	10-298 (299)
MGYP000039799702	1	13.9	8.1e-07	329	35-399 (414)	3-306 (310)
MGYP001952118192	1	10.6	2.11e-06	328	51-394 (414)	5-282 (290)
MGYP001229735816	1	13	1.33e-06	328	48-402 (414)	3-291 (292)
MGYP002767209855	1	13.4	4.16e-07	328	47-398 (414)	3-290 (293)
MGYP000271840028	1	15.7	9.17e-07	328	46-394 (414)	4-290 (299)
MGYP000126475841	1	13.1	6.58e-07	328	47-411 (414)	6-303 (303)
MGYP000149041498	1	16	6.58e-07	328	36-394 (414)	2-297 (307)
MGYP000326952425	1	15.5	2.75e-07	328	53-413 (414)	18-314 (318)
MGYP001024016480	1	11.4	4.84e-06	327	50-395 (414)	2-274 (276)
MGYP000309153207	1	15.6	6.31e-07	327	47-394 (414)	3-287 (288)
MGYP000616129755	1	13.8	1.78e-06	327	46-408 (414)	2-291 (291)
MGYP000036965204	1	15.6	7.77e-07	327	46-394 (414)	2-290 (293)
MGYP000421607477	1	14.4	9.97e-07	327	47-394 (414)	4-290 (293)
MGYP000176862077	1	14	7.15e-07	327	46-400 (414)	11-293 (294)
MGYP002700310467	1	13	1.33e-06	327	47-408 (414)	3-297 (297)
MGYP000449498206	1	17.7	4.92e-07	327	48-396 (414)	9-296 (298)
MGYP000069170306	1	16.3	1.39e-06	327	51-413 (414)	5-288 (298)
MGYP000544034884	1	14.6	2.29e-06	327	48-396 (414)	4-288 (301)
MGYP000167907252	1	16.7	1.89e-07	327	50-395 (414)	10-302 (303)
MGYP000055246157	1	15.8	1.86e-06	326	48-401 (414)	3-292 (293)
MGYP001754426550	1	15	4.92e-07	326	47-404 (414)	5-308 (312)
MGYP000226588653	1	12	2.99e-07	326	51-408 (414)	21-313 (313)
MGYP001065859250	1	13.8	2.94e-06	325	44-386 (414)	3-276 (277)
MGYP003341554911	1	13.9	1.04e-06	325	48-386 (414)	4-282 (284)
MGYP000146678243	1	15.3	8.1e-07	325	47-398 (414)	4-292 (293)
MGYP002537839093	1	15.4	1.71e-06	325	46-394 (414)	4-290 (295)
MGYP003384836389	1	14.5	2.02e-06	325	49-404 (414)	3-293 (296)
MGYP000338942320	1	16	1.71e-06	325	47-395 (414)	4-296 (297)
MGYP000084270386	1	13.6	2.29e-06	325	47-408 (414)	7-301 (301)
MGYP003654545587	1	14.4	9.56e-07	325	53-414 (414)	5-303 (303)
MGYP000041615535	1	13.5	3.77e-06	325	50-395 (414)	16-305 (307)
MGYP000063625721	1	14.9	2.7e-06	325	51-413 (414)	3-313 (315)
MGYP000868994262	1	14.6	3.33e-06	324	50-393 (414)	4-284 (289)
MGYP000196803540	1	11.5	9.17e-07	324	44-398 (414)	4-290 (292)
MGYP001806849259	1	13.2	1.39e-06	324	50-408 (414)	2-293 (294)
MGYP001379968015	1	14.5	1.51e-06	324	50-407 (414)	2-295 (303)
MGYP000317064012	1	12.7	1.13e-06	324	48-394 (414)	7-301 (306)
MGYP000167689820	1	12.7	4.45e-06	324	47-400 (414)	11-305 (306)
MGYP001458677404	1	12.7	4.1e-06	324	51-409 (414)	17-313 (314)
MGYP000511677866	1	15.8	2.14e-07	324	50-396 (414)	6-317 (318)
MGYP000146310791	1	15.4	6.15e-08	324	48-412 (414)	3-311 (359)
MGYP000179559507	1	15.7	6.58e-07	323	46-394 (414)	3-288 (294)
MGYP003364959315	1	14.9	2.2e-06	323	48-412 (414)	3-299 (300)
MGYP000657763883	1	15.7	8.44e-07	323	41-394 (414)	4-295 (301)
MGYP003997275385	1	13.5	6.86e-07	323	47-394 (414)	8-296 (302)
MGYP000061843272	1	14.1	9.56e-07	323	51-404 (414)	14-309 (312)
MGYP003590485607	1	13.9	5.57e-07	322	47-401 (414)	3-292 (293)
MGYP000350037657	1	13.9	2.59e-06	322	51-394 (414)	10-290 (294)
MGYP000340400843	1	14.3	1.57e-06	322	51-402 (414)	8-295 (296)
MGYP000846059034	1	12.9	5.95e-06	322	49-405 (414)	2-298 (301)
MGYP000080960490	1	13.4	3.38e-07	322	42-413 (414)	5-302 (302)
MGYP000140778188	1	12.6	2.49e-06	322	31-407 (414)	1-302 (306)
MGYP000047148565	1	16	1.35e-07	322	51-406 (414)	2-334 (335)
MGYP000188547421	1	13.2	1.23e-06	321	42-396 (414)	4-287 (291)
MGYP001797846859	1	14.8	2.2e-06	321	50-393 (414)	3-289 (292)
MGYP000325646311	1	13.8	1.51e-06	321	44-400 (414)	3-294 (295)
MGYP003293424524	1	14.9	9.17e-07	321	43-394 (414)	2-293 (299)
MGYP001945991311	1	16.4	7.77e-07	321	50-408 (414)	7-301 (301)
MGYP003583965446	1	13.6	4.34e-07	321	47-401 (414)	7-303 (304)
MGYP000101600776	1	14.8	1.86e-06	320	47-395 (414)	4-286 (288)
MGYP000717977041	1	13.7	1.78e-06	320	48-395 (414)	3-285 (294)
MGYP000076610787	1	12.6	3.33e-06	320	49-407 (414)	4-290 (299)
MGYP000155644697	1	13.6	2.94e-06	320	43-408 (414)	2-299 (299)
MGYP001031773154	1	11.6	1.33e-06	320	39-394 (414)	3-298 (303)
MGYP001806080015	1	13.2	6.05e-07	320	48-401 (414)	14-309 (310)
MGYP000318413283	1	13	2.11e-06	320	47-414 (414)	2-302 (310)
MGYP000158966608	1	16.5	1.04e-06	320	31-394 (414)	1-302 (311)
MGYP003649593335	1	12.6	1.51e-06	320	44-400 (414)	11-310 (312)
MGYP000632736249	1	14.6	1.78e-06	319	46-392 (414)	3-286 (292)
MGYP003818141677	1	12	1.94e-06	319	47-414 (414)	3-293 (293)
MGYP000182017511	1	12.1	2.2e-06	319	51-396 (414)	5-296 (297)
MGYP000310967612	1	12.6	1.51e-06	319	49-393 (414)	2-296 (297)
MGYP000878489877	1	13.2	2.49e-06	319	51-396 (414)	14-294 (297)
MGYP000038298289	1	11	4.64e-06	319	51-414 (414)	13-325 (336)
MGYP000184240044	1	15.4	1.39e-06	318	53-397 (414)	2-280 (281)
MGYP000330180036	1	13.2	7.77e-07	318	44-403 (414)	4-289 (291)
MGYP000337509758	1	14.9	1.78e-06	318	50-397 (414)	4-291 (291)
MGYP000084356104	1	15.3	6.58e-07	318	49-394 (414)	9-290 (301)
MGYP002778019879	1	14.9	6.05e-07	318	25-413 (414)	1-341 (346)
MGYP003600729628	1	11.6	5.26e-06	317	29-406 (414)	1-297 (301)
MGYP000141496516	1	13.9	5.26e-06	317	53-393 (414)	22-301 (304)
MGYP000057618383	1	13.2	1.28e-06	317	48-414 (414)	9-312 (312)
MGYP000064027796	1	14.7	7.15e-07	317	45-411 (414)	8-336 (337)
MGYP000330466238	1	13.2	8.44e-07	316	47-394 (414)	3-293 (295)
MGYP001500546608	1	11.8	1.23e-06	316	48-410 (414)	10-301 (302)
MGYP000169368481	1	13.1	5.13e-07	316	3-393 (414)	1-311 (332)
MGYP000154621604	1	11.5	7.15e-07	316	50-393 (414)	19-294 (359)
MGYP000176755248	1	12.1	4.84e-06	315	50-395 (414)	2-285 (286)
MGYP000333035361	1	13.2	1.23e-06	315	47-413 (414)	3-296 (296)
MGYP003109666340	1	12.1	1.16e-05	315	47-403 (414)	4-299 (300)
MGYP000321366493	1	14.7	1.45e-06	315	52-394 (414)	20-297 (301)
MGYP000061145100	1	12.3	1.45e-06	315	51-395 (414)	4-311 (312)
MGYP000447357421	1	11.7	2.2e-06	315	53-394 (414)	9-300 (323)
MGYP000320174176	1	13.6	7.15e-07	315	46-409 (414)	4-317 (326)
MGYP000432043991	1	13.5	2.59e-06	314	53-395 (414)	2-282 (285)
MGYP001128553024	1	12.8	6.75e-06	314	44-402 (414)	3-292 (293)
MGYP000013853091	1	9.9	7.03e-06	314	54-395 (414)	2-296 (299)
MGYP000834807797	1	12.7	2.7e-06	314	48-394 (414)	3-292 (302)
MGYP001434148855	1	10.8	9.03e-06	314	44-394 (414)	4-297 (304)
MGYP000438012117	1	14	3.06e-06	314	51-394 (414)	12-304 (306)
MGYP000457020383	1	11.7	2.49e-06	314	48-414 (414)	13-316 (317)
MGYP001599611414	1	10.3	5.48e-06	314	10-403 (414)	1-318 (319)
MGYP000663033278	1	16.4	4.72e-07	313	46-396 (414)	2-287 (290)
MGYP000146899577	1	10	7.03e-06	313	51-395 (414)	2-291 (292)
MGYP000600839724	1	14.1	1.78e-06	313	53-393 (414)	3-283 (293)
MGYP000176754355	1	15	1.57e-06	313	50-394 (414)	5-285 (295)
MGYP002650525678	1	14.4	1.71e-06	313	51-408 (414)	4-306 (306)
MGYP000249648603	1	15.2	2.11e-06	313	46-394 (414)	7-295 (307)
MGYP001330777417	1	11.3	5.95e-06	313	49-394 (414)	13-299 (308)
MGYP000654469712	1	15.1	8.44e-07	313	46-403 (414)	15-309 (314)
MGYP000338671887	1	11.9	1.33e-06	312	49-395 (414)	3-286 (291)
MGYP002381654722	1	12.2	1.94e-06	312	48-395 (414)	4-288 (292)
MGYP000088116580	1	11.6	8.8e-07	312	31-412 (414)	1-285 (293)
MGYP000028149389	1	12.5	1.28e-06	312	54-414 (414)	2-296 (297)
MGYP002777417096	1	12.7	2.94e-06	312	53-394 (414)	14-296 (300)
MGYP000491513186	1	14	7.77e-07	312	48-407 (414)	3-296 (306)
MGYP000707655039	1	14.7	1.71e-06	311	49-394 (414)	8-292 (300)
MGYP000465473753	1	14.6	2.11e-06	311	51-403 (414)	5-301 (302)
MGYP000981868653	1	12.7	1.18e-06	311	46-407 (414)	3-312 (316)
MGYP000086891090	1	14.7	3.19e-06	310	48-393 (414)	3-280 (281)
MGYP000190812737	1	14.8	3.77e-06	310	76-414 (414)	4-283 (283)
MGYP001496819857	1	12.3	2.2e-06	310	47-408 (414)	3-290 (290)
MGYP001374558243	1	13.2	3.19e-06	310	47-397 (414)	2-288 (305)
MGYP000940152756	1	15.7	7.15e-07	310	51-405 (414)	13-307 (308)
MGYP003365066937	1	14.6	1.23e-06	310	51-414 (414)	11-309 (309)
MGYP002971397441	1	15.7	4.53e-07	310	32-406 (414)	1-315 (316)
MGYP002766873790	1	14.3	2.7e-06	309	51-394 (414)	2-287 (288)
MGYP001041098690	1	15.1	6.31e-07	309	31-394 (414)	1-296 (299)
MGYP001765547931	1	16.6	1.71e-06	309	46-394 (414)	4-290 (300)
MGYP000085062130	1	14.4	9.03e-06	309	43-399 (414)	4-302 (303)
MGYP000326962300	1	9.6	6.75e-06	309	50-407 (414)	7-303 (306)
MGYP000196203216	1	12.7	7.77e-07	309	41-408 (414)	5-313 (313)
MGYP000084182896	1	12.9	1.04e-06	309	23-407 (414)	1-310 (316)
MGYP000162016797	1	15.1	1.64e-06	308	51-395 (414)	6-281 (294)
MGYP000933766169	1	12.7	3.47e-06	308	44-399 (414)	6-291 (308)
MGYP000152578382	1	12.9	2.02e-06	308	44-403 (414)	3-301 (312)
MGYP000579401543	1	11.5	7.97e-06	308	52-414 (414)	9-316 (318)
MGYP003341545376	1	12	1.04e-06	308	46-408 (414)	3-322 (322)
MGYP001487219833	1	16.2	1.04e-06	307	51-405 (414)	3-296 (297)
MGYP000328616497	1	15.4	8.3e-06	307	49-394 (414)	10-297 (301)
MGYP000076596583	1	19.2	4.34e-07	307	48-394 (414)	11-302 (304)
MGYP000185607044	1	15.2	2.02e-06	307	43-394 (414)	13-297 (309)
MGYP003673729328	1	17.1	8.44e-07	307	47-414 (414)	8-310 (310)
MGYP001107238857	1	14.3	2.2e-06	307	44-414 (414)	7-308 (310)
MGYP000621240972	1	14.1	1.57e-06	306	51-394 (414)	5-282 (291)
MGYP000194564690	1	15.3	4.64e-06	306	48-394 (414)	8-291 (293)
MGYP001151361732	1	13.7	2.7e-06	306	44-397 (414)	5-293 (296)
MGYP000141199632	1	14.4	7.15e-07	306	44-407 (414)	5-305 (309)
MGYP001433921304	1	15.3	6.05e-07	306	51-414 (414)	6-312 (314)
MGYP000190368095	1	14.9	3.68e-07	306	25-412 (414)	1-387 (388)
MGYP000433427742	1	12.5	1.78e-06	305	48-403 (414)	6-289 (290)
MGYP000193108561	1	13.7	2.39e-06	305	51-394 (414)	7-291 (293)
MGYP000973992346	1	15.5	1.57e-06	305	47-394 (414)	3-290 (298)
MGYP000070611014	1	13.3	1.57e-06	305	39-401 (414)	2-298 (299)
MGYP001740750360	1	15.4	9.97e-07	305	47-394 (414)	5-292 (301)
MGYP001792517646	1	12.8	5.26e-06	305	34-393 (414)	2-300 (304)
MGYP000323891284	1	12.6	7.77e-07	305	45-392 (414)	2-297 (311)
MGYP000327273487	1	15.9	2.82e-06	304	53-394 (414)	2-272 (273)
MGYP001247286139	1	15.7	5.48e-06	304	51-394 (414)	5-277 (287)
MGYP000062138330	1	13.6	5.26e-06	304	53-403 (414)	2-287 (288)
MGYP003078268275	1	15.3	2.02e-06	304	47-390 (414)	4-287 (288)
MGYP000318628812	1	11.4	2.49e-06	304	44-396 (414)	2-291 (293)
MGYP001820967326	1	15.8	9.17e-07	304	47-393 (414)	3-289 (295)
MGYP000192096758	1	14.7	7.03e-06	304	47-408 (414)	4-295 (296)
MGYP001170803746	1	11.9	1.51e-06	304	50-394 (414)	12-297 (300)
MGYP000075105646	1	12.5	6.75e-06	304	52-413 (414)	10-303 (316)
MGYP000117753113	1	12.1	5.95e-06	304	50-407 (414)	4-314 (319)
MGYP000086817279	1	11.1	3.06e-06	304	41-407 (414)	9-319 (321)
MGYP000163627425	1	12.4	2.02e-06	304	51-414 (414)	6-321 (323)
MGYP000185000688	1	12.2	1.13e-06	304	12-414 (414)	4-333 (364)
MGYP000114836426	1	16.6	2.02e-06	303	47-395 (414)	3-288 (291)
MGYP001814266105	1	10.2	6.47e-06	303	47-393 (414)	3-273 (294)
MGYP000182715282	1	13.4	5.95e-06	303	50-398 (414)	2-296 (297)
MGYP000295393601	1	12.9	1.57e-06	303	48-404 (414)	3-296 (300)
MGYP000873964513	1	15.7	1.08e-06	303	47-406 (414)	3-302 (303)
MGYP000158484109	1	15.7	2.02e-06	303	47-393 (414)	2-285 (304)
MGYP003335866024	1	10.5	1.37e-05	303	47-414 (414)	8-314 (314)
MGYP000161604577	1	15.5	6.05e-07	303	39-394 (414)	4-310 (325)
MGYP000129742691	1	13.6	2.2e-06	303	44-412 (414)	6-333 (333)
MGYP000231398665	1	14.4	5.48e-06	301	47-393 (414)	3-290 (295)
MGYP000099938511	1	10.9	9.81e-06	301	46-394 (414)	8-291 (296)
MGYP002777867236	1	14.5	3.33e-06	301	49-397 (414)	2-290 (300)
MGYP000141773814	1	12	1.37e-05	301	46-394 (414)	2-306 (308)
MGYP000154679736	1	12.7	3.62e-06	301	22-414 (414)	1-314 (343)
MGYP000067782972	1	16.2	4.27e-06	300	50-390 (414)	3-288 (289)
MGYP003591796061	1	15.2	8.66e-06	300	48-407 (414)	3-288 (290)
MGYP003327412443	1	12.3	1.94e-06	300	47-394 (414)	3-286 (291)
MGYP001132523004	1	11.6	6.47e-06	300	49-406 (414)	2-295 (296)
MGYP000096839862	1	15	2.94e-06	300	50-395 (414)	2-280 (297)
MGYP000193958073	1	14.5	5.71e-06	300	44-397 (414)	2-296 (297)
MGYP001891066176	1	14.2	3.77e-06	300	51-398 (414)	13-299 (299)
MGYP000095651753	1	13.6	1.64e-06	300	22-395 (414)	1-306 (315)
MGYP003588742805	1	14.2	1.23e-06	300	51-399 (414)	7-291 (352)
MGYP002138709083	1	13	4.84e-06	300	55-407 (414)	2-299 (375)
MGYP001036748734	1	12.8	1.91e-05	299	53-395 (414)	2-278 (278)
MGYP003627692361	1	11.4	7.03e-06	299	50-401 (414)	2-283 (284)
MGYP000086894213	1	14.5	7.03e-06	299	49-396 (414)	7-284 (291)
MGYP002407461623	1	14.5	1.21e-05	299	56-414 (414)	2-291 (291)
MGYP002519279870	1	11.2	2.94e-06	299	47-408 (414)	3-291 (291)
MGYP000055852877	1	12.4	3.47e-06	299	51-394 (414)	5-281 (292)
MGYP000144022375	1	14.8	3.19e-06	299	50-393 (414)	5-291 (293)
MGYP000415683107	1	15.2	3.77e-06	299	49-397 (414)	8-291 (296)
MGYP000141176197	1	11.4	1.61e-05	299	51-392 (414)	2-286 (299)
MGYP000095740020	1	14.2	3.62e-06	299	51-393 (414)	3-300 (301)
MGYP001013628317	1	13.2	6.58e-07	299	44-393 (414)	3-299 (303)
MGYP002514771595	1	15.8	2.7e-06	299	45-404 (414)	3-302 (304)
MGYP000088098843	1	15.5	1.51e-06	299	48-414 (414)	4-303 (321)
MGYP003663224122	1	14.8	1.26e-05	298	50-404 (414)	2-292 (294)
MGYP000331608314	1	13	9.03e-06	298	50-394 (414)	2-294 (295)
MGYP000247296188	1	14.7	1.71e-06	298	47-394 (414)	4-292 (298)
MGYP003949411701	1	12.8	1.64e-06	298	51-394 (414)	8-291 (298)
MGYP002716994503	1	14.3	9.17e-07	298	47-413 (414)	3-298 (306)
MGYP000063520011	1	17.1	2.59e-06	298	47-401 (414)	12-314 (333)
MGYP000183924380	1	14.3	3.11e-07	298	1-394 (414)	7-346 (357)
MGYP000445088029	1	12.2	1.71e-06	297	51-405 (414)	3-284 (285)
MGYP003343725877	1	14.8	1.57e-06	297	51-393 (414)	2-279 (287)
MGYP001256360900	1	15.4	4.45e-06	297	51-408 (414)	2-297 (297)
MGYP001270402384	1	15.8	1.08e-06	297	49-411 (414)	4-300 (300)
MGYP000435559676	1	13.3	4.1e-06	297	47-393 (414)	4-285 (301)
MGYP000072929701	1	16.2	1.94e-06	297	46-402 (414)	4-300 (304)
MGYP000077551286	1	12.9	4.45e-06	297	50-414 (414)	2-313 (313)
MGYP000220621057	1	14.2	2.11e-06	297	43-414 (414)	3-315 (316)
MGYP000182071791	1	12.4	6.05e-07	297	1-398 (414)	1-357 (361)
MGYP000185634640	1	12.5	1.45e-06	297	4-414 (414)	1-367 (449)
MGYP000075067772	1	13.3	6.21e-06	296	48-395 (414)	4-285 (291)
MGYP000181216888	1	15	1.91e-05	296	50-395 (414)	2-296 (296)
MGYP000158474004	1	14	8.3e-06	296	51-406 (414)	3-297 (298)
MGYP001456510768	1	12.9	3.27e-05	296	51-397 (414)	2-299 (300)
MGYP001626137519	1	15.3	4.84e-06	296	46-403 (414)	4-300 (301)
MGYP000408465337	1	13.4	7.03e-06	296	51-393 (414)	11-296 (303)
MGYP001823472351	1	14.9	2.02e-06	296	25-393 (414)	1-303 (306)
MGYP003945932155	1	11.5	2.59e-06	296	36-407 (414)	2-313 (315)
MGYP000316957428	1	12	4.27e-06	296	44-414 (414)	3-324 (324)
MGYP000047023707	1	11.5	4.1e-06	296	4-410 (414)	1-348 (355)
MGYP000332370262	1	13.5	4.64e-06	295	50-395 (414)	2-277 (279)
MGYP000058939417	1	15	9.81e-06	295	53-395 (414)	2-283 (284)
MGYP000270518801	1	15.8	1.37e-05	295	58-400 (414)	2-286 (287)
MGYP003301746817	1	13.1	3.62e-06	295	47-396 (414)	3-287 (289)
MGYP000311803816	1	14.6	1.11e-05	295	49-398 (414)	3-291 (292)
MGYP000008680593	1	13.9	2.2e-06	295	34-414 (414)	2-300 (300)
MGYP001128793707	1	16	1.94e-06	295	51-406 (414)	13-301 (302)
MGYP000196548774	1	13.6	2.82e-06	295	47-408 (414)	3-304 (304)
MGYP000066299475	1	12.3	1.02e-05	295	25-395 (414)	1-311 (311)
MGYP003639827382	1	12.7	1.45e-06	295	51-411 (414)	3-310 (314)
MGYP002737718520	1	14.3	2.59e-06	294	51-393 (414)	2-279 (284)
MGYP001803138090	1	15.2	1.64e-06	294	44-401 (414)	9-287 (288)
MGYP000144140870	1	12.4	7.03e-06	294	47-398 (414)	5-288 (289)
MGYP003295319001	1	15	2.82e-06	294	51-414 (414)	6-293 (295)
MGYP001109815289	1	9.6	1.37e-05	294	48-392 (414)	5-288 (296)
MGYP000081808477	1	15.8	1.18e-06	294	31-394 (414)	1-300 (305)
MGYP000094199447	1	13.8	1.45e-06	294	15-398 (414)	6-332 (357)
MGYP001181470285	1	12.4	7.97e-06	293	47-404 (414)	13-298 (299)
MGYP000766859271	1	13.4	6.47e-06	293	45-401 (414)	4-301 (302)
MGYP000052232371	1	14.5	1.23e-06	293	12-397 (414)	3-312 (316)
MGYP000249134191	1	12.8	2.39e-06	293	21-414 (414)	2-337 (337)
MGYP003518863566	1	10.3	3.41e-05	292	47-387 (414)	3-281 (282)
MGYP000318072247	1	10.6	7.03e-06	292	50-393 (414)	4-281 (293)
MGYP001370770892	1	15.2	2.49e-06	292	49-402 (414)	6-297 (298)
MGYP001579995784	1	14.2	6.47e-06	292	53-394 (414)	16-298 (300)
MGYP000070299839	1	13.9	1.91e-05	292	49-408 (414)	6-310 (310)
MGYP000316990773	1	15.2	8.1e-07	292	25-398 (414)	1-311 (321)
MGYP000320061243	1	12.8	4.84e-06	291	46-398 (414)	2-282 (283)
MGYP001365148667	1	13.5	2.02e-06	291	47-394 (414)	3-289 (290)
MGYP001810263381	1	12.8	7.97e-06	291	50-395 (414)	8-289 (298)
MGYP001397674213	1	13.8	6.47e-06	291	51-411 (414)	8-303 (303)
MGYP000035222532	1	11.3	8.66e-06	291	50-395 (414)	29-300 (304)
MGYP000049285660	1	12.6	9.97e-07	291	22-393 (414)	3-306 (311)
MGYP000324177618	1	13.4	1.61e-05	291	47-395 (414)	8-312 (317)
MGYP000382110594	1	14.9	1.43e-05	290	53-398 (414)	8-293 (294)
MGYP000315357486	1	14.7	8.3e-06	290	50-396 (414)	4-296 (296)
MGYP000182106456	1	13.2	3.47e-06	290	31-393 (414)	1-290 (301)
MGYP003591501859	1	14.2	2.29e-06	290	49-394 (414)	12-300 (303)
MGYP000787658482	1	14.5	2.29e-06	290	47-398 (414)	8-304 (311)
MGYP000323532761	1	12.2	5.95e-06	290	3-398 (414)	1-320 (321)
MGYP002682702108	1	12.2	9.03e-06	290	42-395 (414)	5-315 (325)
MGYP001226040200	1	14.9	2.02e-06	289	47-404 (414)	3-286 (288)
MGYP000194524669	1	14.6	1.26e-05	289	49-394 (414)	11-287 (291)
MGYP002624904559	1	14.9	5.26e-06	289	49-394 (414)	4-292 (296)
MGYP001026030307	1	14.8	7.64e-06	289	44-394 (414)	3-282 (301)
MGYP001105030634	1	13.2	3.06e-06	289	42-394 (414)	2-295 (301)
MGYP001332699486	1	14.2	2.2e-06	289	46-394 (414)	3-292 (301)
MGYP000064161173	1	15.2	1.94e-06	289	49-394 (414)	8-295 (304)
MGYP001316093583	1	12.7	2.94e-06	289	48-407 (414)	3-301 (305)
MGYP000069434755	1	12.4	5.04e-06	289	48-398 (414)	7-305 (309)
MGYP003571421212	1	14.6	1.75e-05	288	46-375 (414)	3-274 (274)
MGYP002518066106	1	17.8	7.64e-06	288	48-384 (414)	4-280 (281)
MGYP000085475829	1	13.8	2.35e-05	288	53-393 (414)	2-284 (285)
MGYP000190450127	1	10.6	9.41e-06	288	51-394 (414)	2-287 (288)
MGYP000069165407	1	13.3	7.97e-06	288	48-393 (414)	2-289 (291)
MGYP000044070523	1	13.3	1.68e-05	288	53-413 (414)	7-299 (299)
MGYP001572661897	1	10.6	1.55e-05	288	36-409 (414)	2-301 (305)
MGYP000462036732	1	12.8	7.64e-06	288	47-393 (414)	4-291 (306)
MGYP001557215778	1	12.5	1.16e-05	288	51-393 (414)	20-298 (311)
MGYP000146507898	1	15.2	3.19e-06	288	47-403 (414)	3-314 (318)
MGYP002639645583	1	12.5	1.07e-05	287	61-402 (414)	2-276 (277)
MGYP000316863049	1	13.7	7.33e-06	287	47-393 (414)	5-282 (284)
MGYP000165662855	1	16.2	9.03e-06	287	51-394 (414)	6-284 (285)
MGYP000893204772	1	15.6	3.47e-06	287	45-396 (414)	5-288 (290)
MGYP000361698500	1	13.2	3.33e-06	287	28-393 (414)	1-307 (316)
MGYP000337520787	1	13.8	6.05e-07	287	3-403 (414)	12-334 (335)
MGYP000156238298	1	14.6	1.33e-06	287	30-398 (414)	80-377 (378)
MGYP000388873116	1	10.4	6.75e-06	286	47-394 (414)	3-278 (281)
MGYP000513046817	1	12.4	3.93e-06	286	53-399 (414)	2-284 (285)
MGYP000060412156	1	13.4	7.33e-06	286	55-394 (414)	2-274 (289)
MGYP000749115503	1	12	1.83e-05	286	51-405 (414)	3-290 (290)
MGYP000078054118	1	13.8	1.94e-06	286	51-405 (414)	8-292 (293)
MGYP000400852392	1	12.6	6.47e-06	286	49-393 (414)	7-284 (302)
MGYP000082384186	1	13.2	4.57e-05	286	51-393 (414)	12-293 (312)
MGYP000182514815	1	14.4	6.58e-07	286	2-414 (414)	44-380 (427)
MGYP000079241888	1	12.9	1.43e-05	285	50-395 (414)	7-283 (284)
MGYP000903443617	1	14.6	7.97e-06	285	53-398 (414)	15-301 (302)
MGYP000069978644	1	14.8	5.71e-06	285	51-401 (414)	20-301 (304)
MGYP000141181165	1	13.4	4.84e-06	284	51-398 (414)	8-285 (286)
MGYP000039759093	1	13.3	2.35e-05	284	50-414 (414)	2-287 (288)
MGYP000061085546	1	13.9	1.21e-05	284	48-403 (414)	3-294 (297)
MGYP000061751362	1	15.6	4.84e-06	284	47-405 (414)	3-299 (300)
MGYP000676684946	1	17.1	4.84e-06	284	50-395 (414)	4-285 (300)
MGYP001545679024	1	14.7	1.39e-06	284	50-396 (414)	5-300 (303)
MGYP000409118265	1	11.5	1.78e-06	284	31-398 (414)	1-301 (303)
MGYP001071616826	1	15	3.33e-06	284	55-393 (414)	2-288 (306)
MGYP000338349609	1	13.8	3.62e-06	284	46-394 (414)	7-294 (328)
MGYP000150229838	1	14.8	3.47e-06	284	48-414 (414)	15-314 (359)
MGYP000170857614	1	13.6	4.1e-06	283	50-395 (414)	4-280 (281)
MGYP000051826534	1	12.9	4.84e-06	283	50-399 (414)	8-293 (294)
MGYP000317700587	1	13.8	1.49e-05	283	46-397 (414)	4-297 (297)
MGYP000432447618	1	16.4	3.93e-06	283	47-410 (414)	3-307 (307)
MGYP000073964802	1	14.2	2.2e-06	283	51-413 (414)	4-312 (312)
MGYP000064088665	1	12.2	3.01e-05	282	51-405 (414)	2-296 (299)
MGYP000963491018	1	14.2	5.26e-06	282	48-411 (414)	6-301 (301)
MGYP001025942241	1	14.5	1.51e-06	282	48-406 (414)	7-311 (312)
MGYP000388385777	1	14.6	1.21e-05	281	55-393 (414)	2-284 (288)
MGYP003583425881	1	13.8	5.04e-06	281	47-395 (414)	4-280 (291)
MGYP000681018736	1	10.6	2.66e-05	281	50-393 (414)	4-287 (292)
MGYP001491585016	1	15.4	2.59e-06	281	32-394 (414)	1-293 (296)
MGYP000100226395	1	15.4	6.21e-06	281	51-403 (414)	11-300 (302)
MGYP000076089780	1	13	2.89e-05	281	53-402 (414)	2-308 (310)
MGYP000073693382	1	15.6	1.68e-05	281	54-404 (414)	16-313 (313)
MGYP000866539670	1	13.3	1.51e-06	281	31-392 (414)	1-345 (346)
MGYP001627324272	1	11.3	1.11e-05	280	49-393 (414)	4-290 (291)
MGYP001306436060	1	12.5	2.07e-05	280	52-390 (414)	11-291 (292)
MGYP000143106962	1	13.3	5.95e-06	280	51-414 (414)	8-297 (297)
MGYP001765669447	1	10.5	4.57e-05	279	49-393 (414)	2-290 (291)
MGYP000330094418	1	14	7.64e-06	279	49-393 (414)	4-294 (302)
MGYP003599810714	1	14.5	1.71e-06	279	1-390 (414)	1-312 (326)
MGYP000326802396	1	13.1	6.21e-06	279	15-395 (414)	4-332 (335)
MGYP000319756256	1	11.7	5.71e-06	279	50-394 (414)	7-291 (361)
MGYP000594005669	1	14.7	1.37e-05	278	48-398 (414)	3-285 (286)
MGYP002783782773	1	12.2	1.26e-05	278	50-394 (414)	19-293 (296)
MGYP001379233169	1	13.2	5.62e-05	278	51-397 (414)	2-299 (300)
MGYP001358464626	1	11.8	6.75e-06	278	48-394 (414)	12-300 (302)
MGYP000193047538	1	11.6	9.41e-06	278	51-395 (414)	14-298 (306)
MGYP000312252118	1	15.2	1.13e-06	278	25-393 (414)	5-304 (308)
MGYP000137875488	1	13.1	6.47e-06	278	1-402 (414)	1-314 (315)
MGYP001229874753	1	16.2	4.1e-06	277	46-396 (414)	4-282 (286)
MGYP000055859659	1	15.8	6.47e-06	277	50-394 (414)	4-297 (309)
MGYP001559158515	1	12.7	1.07e-05	277	48-395 (414)	12-290 (315)
MGYP000067352687	1	13	1.75e-05	276	70-408 (414)	2-275 (275)
MGYP001105871889	1	12.3	1.99e-05	276	50-395 (414)	2-294 (295)
MGYP000044781541	1	15.8	7.33e-06	276	46-394 (414)	12-297 (301)
MGYP000101639369	1	14.3	1.11e-05	276	51-393 (414)	3-302 (304)
MGYP000331557254	1	13.8	2.59e-06	276	34-414 (414)	51-364 (364)
MGYP000194522312	1	11.7	4.57e-05	275	52-402 (414)	2-280 (281)
MGYP000138629508	1	10.1	1.26e-05	275	51-394 (414)	2-283 (287)
MGYP003599328182	1	13	2.16e-05	275	51-403 (414)	5-290 (291)
MGYP000324279560	1	11.3	4.45e-06	275	32-392 (414)	1-296 (309)
MGYP000155506328	1	13.4	5.04e-06	275	51-414 (414)	16-304 (310)
MGYP000316878062	1	13.6	9.03e-06	274	51-399 (414)	3-288 (290)
MGYP003330561201	1	15.2	2.11e-06	274	31-393 (414)	1-291 (294)
MGYP003289264392	1	12.2	1.49e-05	274	50-395 (414)	3-299 (300)
MGYP000327156849	1	10.8	1.61e-05	274	51-394 (414)	19-299 (308)
MGYP000137704320	1	14.3	5.71e-06	274	48-394 (414)	14-301 (311)
MGYP001405626198	1	14.4	3.33e-06	274	43-408 (414)	14-327 (327)
MGYP000194140702	1	14.8	2.39e-06	274	1-414 (414)	11-364 (367)
MGYP000035077591	1	13.4	1.21e-05	273	51-394 (414)	15-293 (303)
MGYP000079575700	1	14.8	4.64e-06	273	51-394 (414)	20-293 (306)
MGYP000651117073	1	13.8	2.16e-05	272	50-390 (414)	3-284 (285)
MGYP001472135905	1	12.8	4.96e-05	272	49-393 (414)	2-287 (291)
MGYP001426979151	1	13.4	3.14e-05	272	50-393 (414)	7-289 (299)
MGYP002591459527	1	16.4	5.04e-06	272	48-393 (414)	16-299 (300)
MGYP000046763562	1	13.7	1.31e-05	272	47-393 (414)	8-299 (300)
MGYP000157983529	1	13.2	2.89e-05	272	50-394 (414)	2-297 (301)
MGYP000153613386	1	11.5	2.25e-05	272	45-399 (414)	6-302 (303)
MGYP000316843367	1	11.6	5.71e-06	272	1-399 (414)	1-335 (336)
MGYP000049722185	1	11.8	3.71e-05	271	51-390 (414)	5-278 (280)
MGYP002861849713	1	15.1	9.03e-06	271	51-396 (414)	4-276 (281)
MGYP000331687298	1	12.3	7.64e-06	271	49-393 (414)	2-287 (289)
MGYP000097143325	1	12.6	7.03e-06	271	50-393 (414)	2-289 (290)
MGYP000170555166	1	13.7	8.3e-06	271	51-408 (414)	2-290 (290)
MGYP003296146333	1	14	9.41e-06	271	33-392 (414)	3-291 (292)
MGYP001822537567	1	10.5	0.000109	271	52-394 (414)	2-286 (293)
MGYP002709337663	1	13.4	5.95e-06	271	47-393 (414)	2-285 (293)
MGYP000081610636	1	12.5	1.49e-05	271	44-414 (414)	4-297 (297)
MGYP001354636376	1	13.5	1.99e-05	271	50-395 (414)	4-299 (301)
MGYP000425975594	1	9.9	1.83e-05	271	48-394 (414)	10-298 (302)
MGYP000090568419	1	14.5	4.84e-06	271	44-394 (414)	3-294 (307)
MGYP000311836773	1	11.2	1.31e-05	271	22-401 (414)	1-316 (316)
MGYP000426033866	1	14.2	9.81e-06	270	54-403 (414)	2-285 (286)
MGYP000223745758	1	13.1	2.45e-05	270	50-393 (414)	4-295 (297)
MGYP000523547299	1	14.4	5.95e-06	270	47-394 (414)	7-294 (303)
MGYP003365017372	1	12	1.07e-05	270	47-414 (414)	4-304 (304)
MGYP000039675842	1	12.2	5.95e-06	270	46-397 (414)	5-295 (308)
MGYP001775621917	1	16.4	7.45e-07	270	44-407 (414)	5-299 (309)
MGYP000194581073	1	15.8	2.94e-06	270	50-414 (414)	8-340 (348)
MGYP000167272844	1	12	3.33e-06	270	1-405 (414)	3-354 (355)
MGYP003449664420	1	11.7	1.61e-05	269	56-400 (414)	2-277 (283)
MGYP003576128655	1	14.2	8.52e-05	269	53-395 (414)	2-283 (284)
MGYP003588502537	1	12.8	1.43e-05	269	47-398 (414)	3-286 (287)
MGYP003563413118	1	13.1	8.66e-06	269	48-402 (414)	6-289 (290)
MGYP001551848594	1	14.3	4.1e-06	269	50-393 (414)	15-287 (293)
MGYP000079585243	1	13.2	1.91e-05	269	47-396 (414)	5-301 (302)
MGYP000161432108	1	12.9	7.03e-06	269	42-414 (414)	8-303 (303)
MGYP000698699158	1	16.3	6.47e-06	269	50-401 (414)	5-304 (306)
MGYP000565402727	1	14.5	1.43e-05	268	48-397 (414)	9-294 (298)
MGYP000147391660	1	16.1	6.47e-06	268	50-393 (414)	2-295 (299)
MGYP001465385158	1	12.9	1.55e-05	268	51-394 (414)	17-300 (308)
MGYP000069205530	1	13.3	8.66e-06	267	48-396 (414)	3-285 (287)
MGYP001420560793	1	12.8	9.03e-06	267	43-393 (414)	5-296 (304)
MGYP000087853585	1	13.5	1.07e-05	267	51-395 (414)	77-358 (359)
MGYP001626377177	1	10.9	3.06e-06	267	47-413 (414)	26-330 (368)
MGYP001074155685	1	12.2	7.21e-05	266	51-393 (414)	9-291 (297)
MGYP003344309695	1	11.6	0.000105	266	49-405 (414)	5-306 (306)
MGYP001037993453	1	13.3	1.99e-05	266	50-394 (414)	12-300 (310)
MGYP001006653427	1	12.9	9.03e-06	266	50-394 (414)	7-291 (311)
MGYP000078271855	1	14.9	5.26e-06	266	48-408 (414)	10-311 (311)
MGYP000309487376	1	13.1	2.77e-05	265	84-401 (414)	2-287 (287)
MGYP000397010733	1	12.2	1.21e-05	265	49-393 (414)	2-287 (288)
MGYP000244574445	1	11.9	1.07e-05	265	48-396 (414)	5-292 (293)
MGYP001003660308	1	12.7	4.76e-05	265	50-395 (414)	3-293 (294)
MGYP002784842908	1	11.6	2.16e-05	265	47-394 (414)	6-286 (295)
MGYP000063400394	1	13.2	2.25e-05	265	48-395 (414)	3-295 (296)
MGYP000169546809	1	13.2	3.27e-05	265	30-402 (414)	11-306 (308)
MGYP003584739523	1	16.5	7.33e-06	265	51-394 (414)	17-304 (310)
MGYP000088326157	1	12.8	1.07e-05	265	47-414 (414)	10-304 (312)
MGYP000326466242	1	18.4	3.93e-06	265	47-414 (414)	19-342 (342)
MGYP000039001482	1	12	2.11e-06	265	1-402 (414)	4-360 (361)
MGYP001185607010	1	10.9	8.17e-05	264	51-394 (414)	3-269 (273)
MGYP000743353673	1	11.9	2.16e-05	264	46-400 (414)	3-284 (285)
MGYP001152712875	1	13.9	1.16e-05	264	49-394 (414)	9-292 (298)
MGYP000144405721	1	13.1	3.01e-05	264	46-397 (414)	13-300 (300)
MGYP000420447743	1	13.7	3.62e-06	264	18-414 (414)	1-307 (307)
MGYP000418539963	1	13.3	1.61e-05	264	31-414 (414)	1-314 (314)
MGYP000043280219	1	11.8	3.87e-05	264	46-413 (414)	7-320 (332)
MGYP000138223899	1	11.1	1.43e-05	264	33-396 (414)	26-345 (346)
MGYP000042911677	1	10.8	3.01e-05	263	50-394 (414)	4-286 (289)
MGYP000175550029	1	14.1	6.11e-05	263	53-396 (414)	2-290 (291)
MGYP003682045489	1	11.8	6.64e-05	263	44-396 (414)	7-291 (292)
MGYP003381798658	1	12.9	1.49e-05	263	51-406 (414)	14-292 (293)
MGYP000175641790	1	11	1.68e-05	263	55-411 (414)	2-297 (297)
MGYP001772733533	1	13.9	1.68e-05	262	51-393 (414)	3-268 (272)
MGYP003667987164	1	15.2	1.99e-05	262	54-393 (414)	4-277 (283)
MGYP000882202511	1	14.6	1.99e-05	262	47-394 (414)	2-284 (286)
MGYP000049361909	1	13.8	1.16e-05	262	55-394 (414)	2-282 (286)
MGYP001627418308	1	14.3	4.96e-05	262	48-394 (414)	3-288 (292)
MGYP000052903546	1	12.7	2.55e-05	262	50-395 (414)	2-303 (304)
MGYP000076533955	1	14	1.61e-05	262	52-407 (414)	10-304 (310)
MGYP000046474841	1	12.6	1.02e-05	262	16-397 (414)	32-360 (361)
MGYP000323583867	1	12.2	0.000129	261	47-395 (414)	3-286 (287)
MGYP000049640403	1	11.3	1.31e-05	261	52-394 (414)	2-287 (288)
MGYP000694384405	1	16.9	5.26e-06	261	49-393 (414)	2-283 (291)
MGYP002766676441	1	12	2.66e-05	261	48-398 (414)	3-290 (291)
MGYP001547960761	1	9.7	9.25e-05	261	51-393 (414)	3-285 (294)
MGYP000166483021	1	10.5	1.75e-05	261	23-396 (414)	1-314 (318)
MGYP001485886125	1	12	7.52e-05	260	47-384 (414)	8-272 (273)
MGYP000144618637	1	13.7	1.75e-05	260	51-393 (414)	4-293 (295)
MGYP000045381318	1	9.9	2.25e-05	260	52-395 (414)	2-297 (297)
MGYP000845753512	1	12.5	1.26e-05	260	51-394 (414)	8-295 (298)
MGYP000090941264	1	13.6	1.83e-05	260	51-403 (414)	5-304 (306)
MGYP000043379570	1	14	1.49e-05	260	51-414 (414)	16-308 (311)
MGYP000082060801	1	14.8	6.47e-06	260	51-411 (414)	4-329 (334)
MGYP000054515875	1	12.1	2.25e-05	260	49-413 (414)	8-313 (371)
MGYP000063307813	1	13.3	2.59e-06	260	1-390 (414)	77-417 (428)
MGYP000153254533	1	13.4	4.2e-05	259	51-395 (414)	3-299 (300)
MGYP000732567955	1	12.5	3.41e-05	258	58-414 (414)	2-283 (283)
MGYP000195017246	1	14.4	5.62e-05	258	48-386 (414)	10-284 (286)
MGYP000137743785	1	14.3	2.35e-05	258	47-394 (414)	2-286 (287)
MGYP000081554976	1	10	2.35e-05	258	51-393 (414)	7-294 (295)
MGYP000064805231	1	10.5	2.66e-05	258	47-400 (414)	4-297 (298)
MGYP001627499551	1	16.6	1.49e-05	258	49-394 (414)	10-295 (301)
MGYP000184440820	1	11.1	1.43e-05	258	48-414 (414)	8-319 (319)
MGYP000098913355	1	12.5	1.68e-05	258	51-408 (414)	24-323 (325)
MGYP000156233068	1	12.8	9.03e-06	258	46-414 (414)	8-333 (333)
MGYP000353606220	1	14.2	3.41e-05	257	50-394 (414)	3-283 (288)
MGYP000600174763	1	13.8	4.38e-05	257	46-394 (414)	4-287 (289)
MGYP003189537679	1	14.9	1.26e-05	257	50-395 (414)	5-292 (296)
MGYP000604467359	1	13.5	2.55e-05	257	47-394 (414)	4-295 (297)
MGYP000076389626	1	14.2	1.16e-05	257	50-395 (414)	2-302 (303)
MGYP003093735327	1	14.7	2.94e-06	257	51-414 (414)	8-313 (315)
MGYP000317195212	1	10.5	6.11e-05	256	60-393 (414)	2-271 (282)
MGYP000365595686	1	12.5	1.91e-05	256	50-393 (414)	2-288 (291)
MGYP000340037278	1	10.4	6.64e-05	256	51-393 (414)	4-290 (293)
MGYP000277588297	1	14.9	1.16e-05	256	42-407 (414)	2-305 (313)
MGYP003320977756	1	11.8	2.35e-05	255	50-394 (414)	3-284 (286)
MGYP001088440781	1	12.2	3.14e-05	255	24-392 (414)	1-290 (296)
MGYP000219528257	1	12.9	8.3e-06	255	47-399 (414)	7-297 (298)
MGYP001881344602	1	13.6	2.66e-05	255	44-394 (414)	10-294 (298)
MGYP000567731352	1	12	4.57e-05	255	50-414 (414)	5-300 (300)
MGYP000159189270	1	11.4	0.000124	255	51-396 (414)	2-306 (307)
MGYP000193770588	1	13.7	1.07e-05	255	51-414 (414)	21-325 (326)
MGYP000459519160	1	14.6	1.61e-05	254	61-393 (414)	2-272 (281)
MGYP003589285528	1	13.4	8.88e-05	254	38-380 (414)	4-285 (286)
MGYP000350817777	1	12.7	2.66e-05	254	54-395 (414)	2-286 (287)
MGYP000040766536	1	11.3	6.64e-05	254	48-394 (414)	2-291 (292)
MGYP000335688430	1	13.7	1.75e-05	254	48-413 (414)	11-301 (301)
MGYP000083938737	1	15.2	1.16e-05	254	48-394 (414)	12-297 (301)
MGYP000245554110	1	12.5	1.37e-05	254	48-403 (414)	5-303 (304)
MGYP000170666329	1	13.8	1.16e-05	254	15-413 (414)	2-312 (316)
MGYP001823138886	1	15.7	9.65e-05	253	54-395 (414)	3-292 (293)
MGYP000314925198	1	12.7	7.33e-06	253	44-408 (414)	2-323 (323)
MGYP000399363242	1	14.5	1.02e-05	253	32-393 (414)	1-313 (329)
MGYP003601339312	1	11.2	0.000173	252	53-402 (414)	2-288 (291)
MGYP000187057460	1	15	2.66e-05	252	51-396 (414)	3-294 (298)
MGYP000258631851	1	12.5	1.26e-05	252	22-402 (414)	1-295 (299)
MGYP000084179817	1	14.6	2.55e-05	252	51-410 (414)	15-297 (303)
MGYP000328692082	1	11.2	5.62e-05	252	50-394 (414)	2-309 (310)
MGYP000149031746	1	11.6	5.39e-05	252	30-411 (414)	3-314 (314)
MGYP000093829384	1	12.1	3.01e-05	251	47-395 (414)	3-291 (291)
MGYP001036722611	1	13.5	2.66e-05	251	49-395 (414)	2-286 (291)
MGYP000091249985	1	11	0.000101	251	50-391 (414)	3-295 (296)
MGYP001547602781	1	11	4.57e-05	251	47-401 (414)	5-292 (301)
MGYP000170632708	1	11.9	1.61e-05	251	23-394 (414)	1-306 (314)
MGYP000150023637	1	11.6	2.82e-06	251	22-414 (414)	2-440 (454)
MGYP000333250090	1	11.2	7.52e-05	250	49-395 (414)	2-283 (284)
MGYP000270005175	1	11.2	4.96e-05	250	47-398 (414)	5-283 (288)
MGYP000036078616	1	11.6	1.07e-05	250	44-394 (414)	3-292 (294)
MGYP000496736885	1	13.5	1.99e-05	250	50-394 (414)	8-292 (294)
MGYP000073977077	1	8.9	1.55e-05	250	11-411 (414)	7-368 (370)
MGYP000372220753	1	13.2	7.84e-05	249	49-394 (414)	2-281 (282)
MGYP001232350865	1	13.2	5.62e-05	249	51-395 (414)	4-283 (284)
MGYP000052648159	1	11.7	8.88e-05	249	51-396 (414)	3-286 (287)
MGYP001780077627	1	12.6	6.92e-05	249	51-397 (414)	2-299 (300)
MGYP000160694640	1	13.3	1.55e-05	249	53-395 (414)	2-312 (313)
MGYP003973650041	1	15.4	1.07e-05	249	28-413 (414)	37-371 (379)
MGYP000307275461	1	12.4	6.37e-05	248	51-395 (414)	2-283 (283)
MGYP003566853339	1	15.1	3.27e-05	248	60-394 (414)	2-276 (285)
MGYP003375098142	1	12.5	0.000134	248	51-398 (414)	4-310 (313)
MGYP000976898640	1	11.4	9.25e-05	247	47-398 (414)	15-284 (295)
MGYP000087104865	1	12.3	0.000101	246	47-395 (414)	2-285 (286)
MGYP000306458314	1	10	7.21e-05	246	46-401 (414)	3-287 (288)
MGYP000326603054	1	11.9	0.000105	246	53-394 (414)	7-287 (290)
MGYP000099504453	1	11.6	7.52e-05	246	46-394 (414)	2-288 (290)
MGYP001349950869	1	11.6	5.86e-05	246	50-398 (414)	2-283 (294)
MGYP001053008834	1	11.6	8.17e-05	246	47-414 (414)	3-291 (299)
MGYP000099818877	1	14.1	2.77e-05	246	46-407 (414)	7-320 (324)
MGYP000158480648	1	12.8	5.71e-06	246	44-414 (414)	6-333 (343)
MGYP003594000117	1	16.8	1.07e-05	245	167-404 (414)	15-280 (280)
MGYP000222765699	1	13.5	0.000101	245	50-395 (414)	2-283 (284)
MGYP000085345467	1	14.8	7.21e-05	245	50-394 (414)	2-284 (285)
MGYP000308196699	1	12.7	0.000309	245	55-395 (414)	3-287 (288)
MGYP000613175545	1	11.5	4.57e-05	245	55-395 (414)	2-288 (289)
MGYP000064793874	1	13	0.000124	245	50-398 (414)	2-292 (293)
MGYP001449276612	1	12.2	0.00014	245	50-394 (414)	2-298 (301)
MGYP001374789187	1	11.5	6.37e-05	245	51-394 (414)	14-304 (308)
MGYP000092985957	1	12.8	0.000188	244	80-407 (414)	2-273 (284)
MGYP003402989847	1	11.8	0.000105	244	45-386 (414)	2-289 (290)
MGYP000910857677	1	12.2	5.17e-05	244	50-393 (414)	5-293 (294)
MGYP000039712065	1	13.2	4.76e-05	244	53-403 (414)	2-302 (303)
MGYP000321341375	1	12.5	3.27e-05	244	51-413 (414)	8-313 (315)
MGYP000326833099	1	12.2	1.83e-05	244	1-386 (414)	3-315 (319)
MGYP000344175111	1	15.6	0.000296	243	49-384 (414)	2-275 (277)
MGYP000265315566	1	16.1	4.38e-05	243	47-395 (414)	3-284 (290)
MGYP001025840927	1	11.9	8.17e-05	243	47-395 (414)	3-291 (291)
MGYP002632567824	1	11.6	9.65e-05	243	52-393 (414)	2-294 (295)
MGYP001132216587	1	12.2	6.37e-05	243	47-397 (414)	6-292 (295)
MGYP000235833040	1	12.4	5.39e-05	243	50-408 (414)	23-309 (309)
MGYP000082059440	1	13.9	2.45e-05	243	51-414 (414)	4-307 (313)
MGYP000327145621	1	15.6	5.26e-06	243	46-414 (414)	6-359 (359)
MGYP001626817897	1	12.3	0.000119	242	63-395 (414)	3-273 (274)
MGYP000866006821	1	14	3.14e-05	242	48-385 (414)	10-281 (282)
MGYP001069552324	1	14.7	2.35e-05	242	48-396 (414)	6-292 (292)
MGYP000338256414	1	13.7	4.76e-05	242	51-399 (414)	16-297 (303)
MGYP000987312744	1	18.2	3.01e-05	241	169-398 (414)	39-260 (263)
MGYP001592117341	1	14.7	0.000114	241	54-394 (414)	4-287 (291)
MGYP003562873814	1	13.2	3.71e-05	241	43-398 (414)	2-290 (291)
MGYP000269681607	1	11.7	7.84e-05	241	44-394 (414)	2-289 (292)
MGYP000147260750	1	12.6	5.86e-05	241	51-395 (414)	7-296 (297)
MGYP001048376230	1	10.4	0.000212	241	51-395 (414)	6-298 (302)
MGYP003370133301	1	10.2	0.000146	241	51-398 (414)	2-305 (305)
MGYP000078907893	1	11.9	1.75e-05	241	34-408 (414)	17-327 (329)
MGYP000051511190	1	11.6	2.89e-05	241	1-414 (414)	1-386 (391)
MGYP001104658250	1	17.8	1.68e-05	240	80-412 (414)	12-287 (288)
MGYP000212029355	1	10.9	0.000296	239	53-397 (414)	2-289 (290)
MGYP000048617863	1	12.8	0.000101	239	44-396 (414)	3-300 (331)
MGYP000326473234	1	14.6	0.000159	238	154-411 (414)	23-277 (277)
MGYP000080994230	1	12.1	8.52e-05	238	51-393 (414)	4-282 (285)
MGYP000396563760	1	15.2	4.03e-05	238	62-414 (414)	2-290 (290)
MGYP001380911719	1	10.6	3.56e-05	238	44-393 (414)	2-292 (295)
MGYP000367120144	1	15.2	8.17e-05	238	55-413 (414)	2-300 (310)
MGYP000052224017	1	12.7	4.96e-05	238	44-411 (414)	3-303 (318)
MGYP000854739247	1	12.7	4.2e-05	238	48-414 (414)	8-318 (319)
MGYP000058199895	1	11.3	6.64e-05	238	30-413 (414)	21-328 (331)
MGYP000085342796	1	14.2	8.17e-05	237	81-394 (414)	8-263 (264)
MGYP003670515876	1	11.7	0.00014	237	51-394 (414)	2-281 (283)
MGYP001598223747	1	13.5	5.86e-05	237	50-395 (414)	9-291 (300)
MGYP000745648254	1	11.1	0.000159	237	48-398 (414)	11-300 (301)
MGYP003101727657	1	14.6	2.25e-05	237	51-407 (414)	2-300 (308)
MGYP001032068330	1	15.4	4.57e-05	236	32-398 (414)	1-307 (308)
MGYP000057645287	1	11	0.000241	236	51-414 (414)	12-298 (309)
MGYP002587779092	1	12.5	4.2e-05	236	52-394 (414)	14-304 (309)
MGYP001154170309	1	14.6	1.49e-05	236	51-394 (414)	17-311 (318)
MGYP000155019181	1	10.9	4.2e-05	236	49-407 (414)	5-311 (337)
MGYP003576691426	1	14.2	2.89e-05	235	61-395 (414)	2-272 (275)
MGYP000849112060	1	12.1	7.21e-05	235	47-394 (414)	6-292 (297)
MGYP000781115036	1	13.8	3.01e-05	234	61-407 (414)	2-280 (284)
MGYP000097710189	1	10.3	5.62e-05	234	29-405 (414)	15-321 (322)
MGYP000095743501	1	11.6	2.35e-05	234	34-394 (414)	22-326 (331)
MGYP003408545442	1	15.2	0.000109	233	62-405 (414)	1-275 (283)
MGYP000321064376	1	13.7	6.64e-05	233	50-393 (414)	3-284 (289)
MGYP000167237469	1	14.6	5.86e-05	233	49-405 (414)	6-293 (294)
MGYP000338955176	1	12.8	0.000105	233	35-414 (414)	5-323 (327)
MGYP000098907279	1	12.6	4.2e-05	233	51-414 (414)	5-321 (365)
MGYP002777012200	1	11.5	1.49e-05	233	34-411 (414)	33-372 (373)
MGYP001778791853	1	16.2	1.75e-05	232	86-407 (414)	3-274 (279)
MGYP001618065338	1	13.3	0.000114	232	59-397 (414)	2-282 (282)
MGYP000873803336	1	13.7	0.000109	232	51-390 (414)	13-295 (296)
MGYP000394252840	1	15.5	6.64e-05	232	50-395 (414)	2-296 (298)
MGYP001600571048	1	13.4	2.55e-05	232	41-395 (414)	3-297 (299)
MGYP000170667593	1	12.8	6.11e-05	232	30-413 (414)	3-308 (308)
MGYP000324908823	1	9.8	2.45e-05	232	43-394 (414)	2-320 (321)
MGYP000038017020	1	11.6	8.17e-05	232	13-413 (414)	1-364 (383)
MGYP000753912838	1	14.1	0.000468	231	51-378 (414)	3-267 (268)
MGYP000314736348	1	10.5	0.00014	231	51-396 (414)	5-275 (278)
MGYP000092699294	1	12.7	9.25e-05	231	48-394 (414)	2-282 (283)
MGYP000051752554	1	14	6.92e-05	231	51-395 (414)	2-285 (287)
MGYP001192224193	1	10.4	0.000129	231	51-395 (414)	4-288 (290)
MGYP000099308126	1	11.9	0.000129	231	51-395 (414)	6-294 (295)
MGYP003290611845	1	13.6	0.000124	230	54-395 (414)	3-275 (277)
MGYP000058217658	1	14.1	9.25e-05	230	47-393 (414)	3-290 (292)
MGYP000079173649	1	10.9	6.37e-05	230	47-393 (414)	6-304 (306)
MGYP000176176571	1	12.6	0.000173	230	49-406 (414)	2-306 (307)
MGYP000170982824	1	12	3.56e-05	230	46-394 (414)	13-325 (330)
MGYP000145834506	1	12.8	0.000146	229	51-395 (414)	2-284 (285)
MGYP000045944354	1	13.7	0.000114	229	53-394 (414)	14-293 (298)
MGYP001403606315	1	13.7	0.000146	229	51-395 (414)	4-297 (300)
MGYP000976930156	1	14.2	8.52e-05	229	50-399 (414)	5-301 (308)
MGYP000147282356	1	12.9	2.66e-05	229	3-394 (414)	1-315 (318)
MGYP000190423361	1	13.2	5.39e-05	229	34-410 (414)	21-354 (368)
MGYP000154770110	1	14.5	0.000449	227	168-398 (414)	38-268 (269)
MGYP000627727237	1	10.6	0.000173	227	50-399 (414)	3-298 (299)
MGYP000497930321	1	12.2	0.00035	227	48-414 (414)	7-298 (300)
MGYP000617903104	1	13.7	0.000166	227	51-410 (414)	11-304 (304)
MGYP001544471481	1	12.9	0.000105	226	163-393 (414)	28-255 (261)
MGYP001825210795	1	12.8	0.000296	226	56-400 (414)	2-273 (274)
MGYP001030243738	1	10.8	0.000119	226	51-393 (414)	2-302 (304)
MGYP000182047116	1	16.6	1.99e-05	226	10-394 (414)	2-301 (309)
MGYP000044063930	1	10.8	0.00038	225	47-395 (414)	2-283 (284)
MGYP000147009576	1	13.4	8.88e-05	225	46-394 (414)	3-287 (289)
MGYP000190825060	1	14.2	0.000119	225	51-395 (414)	3-292 (294)
MGYP000166596702	1	12.1	0.000159	224	49-401 (414)	3-274 (275)
MGYP001568754129	1	13.5	0.000114	224	50-398 (414)	2-293 (294)
MGYP002511528324	1	11.9	0.000146	224	48-393 (414)	6-292 (294)
MGYP000338717024	1	15.6	0.000231	224	51-414 (414)	8-298 (298)
MGYP000071782900	1	12.5	5.17e-05	224	48-394 (414)	10-307 (321)
MGYP000873064316	1	14.3	0.000109	223	48-414 (414)	19-323 (338)
MGYP001810739551	1	14.5	0.000146	222	63-401 (414)	3-282 (283)
MGYP000069937646	1	13.5	9.65e-05	222	51-393 (414)	3-290 (292)
MGYP000058945317	1	13.4	0.000553	222	48-395 (414)	4-298 (302)
MGYP000070414493	1	10.4	0.000222	222	47-396 (414)	11-296 (309)
MGYP002512166940	1	13	0.000413	221	51-395 (414)	5-278 (279)
MGYP000324970331	1	14.2	8.17e-05	221	49-393 (414)	2-290 (292)
MGYP001584916344	1	15	8.88e-05	221	46-394 (414)	17-302 (304)
MGYP000047482526	1	13.5	0.00144	220	50-353 (414)	2-234 (235)
MGYP000144328428	1	10.5	0.000273	220	53-393 (414)	2-283 (286)
MGYP002570599001	1	13.5	9.65e-05	220	80-402 (414)	11-287 (288)
MGYP001767024798	1	13.2	0.000129	220	51-394 (414)	12-293 (295)
MGYP003983297333	1	14.2	0.000413	219	37-340 (414)	2-237 (239)
MGYP000317084404	1	12.5	0.000273	218	50-395 (414)	8-293 (294)
MGYP001180490109	1	14	8.17e-05	217	48-395 (414)	4-288 (290)
MGYP000146887178	1	11	0.000101	217	59-391 (414)	42-309 (310)
MGYP000074077908	1	12.6	5.86e-05	217	49-399 (414)	5-316 (317)
MGYP000335272526	1	14.5	0.00127	216	51-366 (414)	6-255 (255)
MGYP000193012414	1	16.9	0.000101	216	168-403 (414)	44-264 (265)
MGYP000052898209	1	15.9	7.21e-05	216	65-414 (414)	2-262 (332)
MGYP000479146616	1	15.9	0.000771	214	50-339 (414)	13-241 (242)
MGYP001226364819	1	13.7	0.000431	214	65-402 (414)	2-276 (277)
MGYP000194564511	1	13.1	0.000626	213	53-395 (414)	2-284 (285)
MGYP001557880381	1	11.3	0.00035	213	53-402 (414)	2-298 (299)
MGYP000313087526	1	12.2	0.000188	213	2-395 (414)	1-322 (327)
MGYP003789472533	1	10.8	0.00201	212	49-380 (414)	15-276 (277)
MGYP000058896677	1	8.9	0.000251	212	55-395 (414)	3-288 (289)
MGYP002884247372	1	11.9	0.00018	212	33-407 (414)	9-342 (363)
MGYP001564194338	1	12.4	0.000653	211	81-401 (414)	8-273 (274)
MGYP003295397072	1	9.1	0.00156	211	51-393 (414)	2-277 (286)
MGYP000058896394	1	12.3	0.000119	211	54-395 (414)	3-288 (290)
MGYP000327082084	1	10.7	5.17e-05	211	81-394 (414)	6-297 (299)
MGYP000088423927	1	13.7	0.000804	211	50-410 (414)	3-310 (312)
MGYP003111507580	1	12.4	0.000396	210	44-408 (414)	4-294 (294)
MGYP000157848296	1	12.1	0.000296	210	51-393 (414)	4-294 (295)
MGYP000190511899	1	11.8	0.000309	209	53-407 (414)	5-301 (309)
MGYP000160792884	1	13.8	0.00014	209	79-394 (414)	14-324 (341)
MGYP000406524261	1	13.4	0.00185	208	167-394 (414)	38-255 (256)
MGYP000585537460	1	10.3	0.00018	208	20-407 (414)	3-336 (356)
MGYP000361109462	1	12.1	0.000296	207	54-395 (414)	3-288 (290)
MGYP000181611007	1	11.7	0.000188	207	47-393 (414)	3-296 (298)
MGYP000181978201	1	11	0.000488	207	51-395 (414)	2-297 (298)
MGYP001530236105	1	14.4	0.00014	206	47-402 (414)	6-266 (270)
MGYP001409763628	1	11.9	0.000336	206	50-397 (414)	2-284 (285)
MGYP000144320088	1	12.2	0.000413	206	50-393 (414)	3-291 (295)
MGYP000074316991	1	11.2	0.000396	206	46-393 (414)	7-291 (306)
MGYP001042183340	1	14.2	0.000212	205	50-383 (414)	4-280 (281)
MGYP000091357634	1	12.9	0.000771	205	51-396 (414)	4-303 (305)
MGYP000151720480	1	11.4	0.000105	205	45-414 (414)	4-366 (366)
MGYP002682533031	1	13.2	0.000212	204	167-414 (414)	13-242 (242)
MGYP001228163075	1	11.4	0.000251	204	47-394 (414)	5-300 (311)
MGYP000571895733	1	14.3	0.00117	203	53-384 (414)	2-265 (266)
MGYP001817616860	1	13.6	0.000296	202	168-401 (414)	45-267 (268)
MGYP000179030710	1	13.7	0.00035	202	44-403 (414)	13-309 (310)
MGYP000155631737	1	12.9	0.000152	202	22-393 (414)	2-311 (317)
MGYP000054459551	1	13.8	0.000241	201	167-413 (414)	13-262 (367)
MGYP000099150046	1	12.2	0.000804	200	41-407 (414)	2-307 (318)
MGYP003678395087	1	16	0.00218	199	58-334 (414)	10-223 (223)
MGYP000376215369	1	14.5	0.00071	199	162-393 (414)	13-244 (247)
MGYP000055664412	1	10.3	0.00117	199	53-393 (414)	2-269 (271)
MGYP000038285575	1	11.5	0.000322	199	51-393 (414)	27-313 (316)
MGYP000035338361	1	10.6	0.000681	198	49-393 (414)	2-291 (294)
MGYP001821830741	1	12.2	0.00053	198	51-394 (414)	16-297 (298)
MGYP001582695748	1	11	0.0015	195	51-396 (414)	9-293 (294)
MGYP000066220706	1	14.2	0.00091	195	51-395 (414)	3-299 (300)
MGYP000179005413	1	10.1	0.00117	194	64-391 (414)	2-293 (293)
MGYP000691719982	1	17.9	0.000601	193	168-402 (414)	2-219 (220)
MGYP001301581084	1	15.8	0.000413	191	167-393 (414)	5-217 (218)
MGYP000159187077	1	13.3	0.00117	191	87-393 (414)	2-254 (257)
MGYP000412238859	1	16.7	0.000396	191	153-412 (414)	4-257 (263)
MGYP001107231137	1	16.9	0.000804	191	168-407 (414)	29-269 (278)
MGYP002589888428	1	11	0.00091	191	44-394 (414)	2-296 (298)
MGYP001209382835	1	15.1	0.00185	190	49-346 (414)	2-221 (233)
MGYP000061154765	1	13.6	0.000681	189	51-395 (414)	2-294 (296)
MGYP000747489114	1	13.1	0.00163	187	169-390 (414)	10-232 (233)
MGYP000040425601	1	12	0.00156	187	51-393 (414)	2-280 (283)
MGYP000176790431	1	12.1	0.000626	187	47-394 (414)	3-306 (322)
MGYP000318329082	1	14.5	0.000509	187	3-403 (414)	1-354 (356)
MGYP000163176706	1	14.6	4.96e-05	184	16-402 (414)	35-377 (379)
MGYP000083998202	1	11.3	0.00218	183	66-408 (414)	2-282 (282)
MGYP000067659479	1	13.6	0.000949	180	47-395 (414)	4-326 (405)
MGYP001336977471	1	14	0.00461	179	50-363 (414)	2-243 (247)
MGYP000132621548	1	12.5	0.00304	179	47-360 (414)	6-254 (256)
MGYP003295012003	1	12.9	0.000601	179	48-394 (414)	2-303 (304)
MGYP000036709814	1	13.7	0.000114	176	54-414 (414)	2-274 (276)
MGYP000095643227	1	17.5	0.00117	176	170-414 (414)	22-276 (302)
MGYP000603191417	1	12.6	0.00424	175	167-400 (414)	11-247 (250)
MGYP001826511454	1	16.3	0.012	174	160-311 (414)	59-204 (207)
MGYP000162187247	1	15.3	0.00759	174	167-394 (414)	6-231 (232)
MGYP001485723869	1	13.4	0.000488	174	50-395 (414)	4-289 (291)
MGYP000076188708	1	15.1	0.00407	173	167-395 (414)	22-249 (249)
MGYP000054463770	1	14.2	0.00247	169	23-399 (414)	1-309 (310)
MGYP001213752824	1	14.7	0.00257	165	168-403 (414)	21-258 (261)
MGYP002621181116	1	10.2	0.00424	165	84-399 (414)	12-271 (272)
MGYP000137572253	1	12.2	0.0243	162	46-364 (414)	5-269 (273)
MGYP000041311990	1	23.1	0.00974	161	163-319 (414)	52-205 (270)
MGYP000534237103	1	11.2	0.00209	161	51-390 (414)	2-282 (284)
MGYP001757298439	1	12.8	0.00974	160	51-394 (414)	5-290 (301)
MGYP000153164685	1	16.9	0.00091	159	167-395 (414)	21-244 (246)
MGYP000025702021	1	13.4	0.0154	154	50-392 (414)	4-252 (254)
MGYP000044037660	1	14.5	0.0101	153	163-403 (414)	4-231 (232)
MGYP003322776201	1	10.4	0.0384	150	68-343 (414)	2-224 (234)
MGYP001556458468	1	12.8	0.0214	149	1-326 (414)	1-244 (245)
MGYP000520397323	1	14.2	0.0417	147	66-302 (414)	4-178 (180)
MGYP001574596474	1	16.5	0.0606	147	61-340 (414)	3-221 (222)
MGYP000047129588	1	16.1	0.0535	146	63-302 (414)	3-182 (186)
MGYP000539585510	1	14	0.0147	145	39-395 (414)	2-249 (250)
MGYP002135538196	1	13.9	0.00359	142	51-414 (414)	6-256 (256)
MGYP002147000220	1	10	0.0253	142	51-393 (414)	8-286 (287)
MGYP000158667208	1	14.9	0.123	141	163-310 (414)	31-182 (184)
MGYP000164621960	1	14.6	0.0778	141	61-322 (414)	7-209 (210)
MGYP000332053222	1	18.9	0.0558	140	167-341 (414)	14-184 (187)
MGYP003583895496	1	11.5	0.0325	140	51-411 (414)	8-276 (276)
MGYP002852586397	1	18.4	0.00461	138	166-413 (414)	9-230 (247)
MGYP000976842692	1	11.6	0.0353	138	45-395 (414)	2-297 (305)
MGYP001566762584	1	11.1	0.0845	136	53-332 (414)	7-222 (223)
MGYP000513019423	1	13.7	0.128	128	60-297 (414)	16-191 (201)
MGYP000202371626	1	14.8	0.179	127	65-324 (414)	16-215 (216)
MGYP000076689998	1	9	0.104	127	28-344 (414)	3-249 (252)
MGYP001343532601	1	18.2	0.0582	126	88-343 (414)	22-223 (227)
MGYP000321255711	1	12.9	0.164	125	59-310 (414)	12-207 (209)
MGYP000194254384	1	11	0.0233	124	57-412 (414)	3-269 (292)
MGYP002632121043	1	14.2	0.0716	123	51-348 (414)	14-248 (249)
MGYP000173938526	1	12.5	0.282	121	168-300 (414)	67-200 (201)
MGYP000061884036	1	13.2	0.648	116	162-301 (414)	42-180 (182)
MGYP000182653493	1	14.5	0.704	116	170-302 (414)	74-207 (215)
MGYP000043862889	1	13.4	0.484	115	59-305 (414)	13-201 (202)
MGYP000048736509	1	13.5	0.0811	115	31-411 (414)	1-281 (288)
MGYP001361269731	1	12.2	0.333	114	165-318 (414)	56-209 (209)
MGYP000161874513	1	9.9	0.446	112	28-316 (414)	2-218 (218)
MGYP000930982896	1	13	0.982	104	161-310 (414)	53-199 (202)
MGYP000108215774	1	17.6	0.41	104	162-312 (414)	63-206 (206)
MGYP002601441045	1	12.8	0.0998	103	29-313 (414)	1-225 (228)
MGYP000067779646	1	12.6	0.549	102	64-299 (414)	10-194 (196)
MGYP000155333596	1	11.5	0.0998	102	64-414 (414)	5-267 (267)
MGYP003569782837	1	11.5	0.239	101	60-313 (414)	16-220 (228)
MGYP000096558907	1	11.5	1.11	100	59-305 (414)	13-198 (206)
MGYP000323512785	1	17.2	1.91	95	167-304 (414)	60-192 (193)
MGYP000090007941	1	15.3	0.734	92	168-295 (414)	61-191 (192)
MGYP001549888150	0.98	15.1	0.904	79	93-272 (414)	10-170 (174)
MGYP003383366322	0.94	12.9	0.194	71	50-408 (414)	2-266 (266)
MGYP001817253329	0.25	13.1	6.38	42	166-348 (414)	9-196 (198)
MGYP000324295842	0.25	14.2	3.87	42	167-365 (414)	51-237 (238)

## Sheet: PDB100
Target	Description	Scientific Name	Prob.	Seq. Id.	E-Value	Score	Query Pos.	Target Pos.
5y79-assembly1_B	Crystal structure of the triose-phosphate/phosphate translocator in complex with 3-phosphoglycerate	Galdieria sulphuraria	1	13.2	2.67e-06	300	36-395 (414)	2-299 (305)
6i1r-assembly1_A	Crystal structure of CMP bound CST in an outward facing conformation	Zea mays	1	9.8	1.53e-05	226	51-401 (414)	3-307 (309)
6i1r-assembly1_B	Crystal structure of CMP bound CST in an outward facing conformation	Zea mays	1	10.3	2.53e-05	219	51-401 (414)	3-308 (310)
6i1z-assembly1_A	Outward facing structure of apo CST	Zea mays	1	9.3	2.53e-05	217	51-400 (414)	3-281 (283)
6i1z-assembly1_B	Outward facing structure of apo CST	Zea mays	1	10.1	2.42e-05	212	51-400 (414)	2-288 (291)
7paf-assembly1_D	Streptococcus pneumoniae choline importer LicB in lipid nanodiscs	Streptococcus pneumoniae TIGR4	1	15.1	4.52e-05	205	52-393 (414)	2-277 (278)
6oh4-assembly2_B	X-ray crystal structure of the mouse CMP-sialic acid transporter in complex with CMP, by hanging drop vapor diffusion	Mus musculus	1	10.3	7.44e-05	204	51-393 (414)	2-295 (299)
7b0k-assembly1_A	membrane protein structure	Streptococcus pneumoniae	1	13.3	0.000281	199	52-393 (414)	2-253 (255)
5i20-assembly1_A	Crystal structure of protein	Ancylobacter novellus DSM 506	1	12.2	0.000133	194	51-408 (414)	5-287 (287)
6oh3-assembly1_A	X-ray crystal structure of the mouse CMP-sialic acid transporter in complex with CMP-sialic acid, by lipidic cubic phase	Mus musculus	1	10.1	0.000117	194	51-393 (414)	7-300 (304)
6xbo-assembly1_A	X-ray crystal structure of the mouse CMP-Sialic acid transporter in complex with 5-methyl CMP	Mus musculus	1	9.5	0.000202	192	53-393 (414)	7-305 (319)
5i20-assembly5_E	Crystal structure of protein	Ancylobacter novellus DSM 506	1	12.1	0.000122	186	46-408 (414)	4-289 (291)
5i20-assembly3_C	Crystal structure of protein	Ancylobacter novellus DSM 506	1	12.5	0.000151	178	58-395 (414)	5-277 (282)
5i20-assembly2_B	Crystal structure of protein	Ancylobacter novellus DSM 506	1	11.2	0.000281	172	58-398 (414)	5-278 (279)
5i20-assembly4_D	Crystal structure of protein	Ancylobacter novellus DSM 506	1	10.3	0.000164	172	58-395 (414)	5-278 (280)
5ogk-assembly1_A	Crystal structure of a nucleotide sugar transporter with bound nucleotide sugar.	Saccharomyces cerevisiae S288C	1	12.7	0.000281	169	58-403 (414)	6-291 (292)
5ogk-assembly2_C	Crystal structure of a nucleotide sugar transporter with bound nucleotide sugar.	Saccharomyces cerevisiae S288C	1	12.9	0.000332	166	58-403 (414)	7-293 (294)
6qsk-assembly2_G-2	Crystal structure of a nucleotide sugar transporter with bound nucleotide monophosphate.	Saccharomyces cerevisiae S288C	1	13.1	0.000646	159	58-403 (414)	7-295 (296)
5oge-assembly3_H-2	Crystal structure of a nucleotide sugar transporter	Saccharomyces cerevisiae S288C	1	13.3	0.000795	157	58-403 (414)	9-298 (299)
5oge-assembly2_B	Crystal structure of a nucleotide sugar transporter	Saccharomyces cerevisiae S288C	1	12.9	0.00142	155	58-403 (414)	9-298 (299)
5oge-assembly4_D	Crystal structure of a nucleotide sugar transporter	Saccharomyces cerevisiae S288C	1	13.5	0.000939	152	58-403 (414)	9-302 (303)
5oge-assembly1_A	Crystal structure of a nucleotide sugar transporter	Saccharomyces cerevisiae S288C	1	13.2	0.00111	151	58-403 (414)	9-298 (299)
5oge-assembly1_E	Crystal structure of a nucleotide sugar transporter	Saccharomyces cerevisiae S288C	1	13.6	0.00106	150	58-403 (414)	9-303 (304)
5oge-assembly3_C	Crystal structure of a nucleotide sugar transporter	Saccharomyces cerevisiae S288C	1	13.9	0.00116	149	58-403 (414)	9-301 (302)
5oge-assembly4_F	Crystal structure of a nucleotide sugar transporter	Saccharomyces cerevisiae S288C	1	13.4	0.00155	146	58-403 (414)	9-304 (305)
6qsk-assembly1_A	Crystal structure of a nucleotide sugar transporter with bound nucleotide monophosphate.	Saccharomyces cerevisiae S288C	1	13.2	0.00255	143	58-403 (414)	6-291 (292)
5ogk-assembly1_B	Crystal structure of a nucleotide sugar transporter with bound nucleotide sugar.	Saccharomyces cerevisiae S288C	1	11.9	0.00175	140	58-403 (414)	6-296 (297)
6ukj-assembly1_A	Single-Particle Cryo-EM Structure of Plasmodium falciparum Chloroquine Resistance Transporter (PfCRT) 7G8 Isoform	Plasmodium falciparum 7G8	1	9.6	0.00402	135	36-406 (414)	4-349 (350)
5i20-assembly6_F	Crystal structure of protein	Ancylobacter novellus DSM 506	0.9	13.4	0.218	67	167-394 (414)	28-215 (219)
