# Supplementary material
Source: Research Square preprint supplement (doi:10.21203/rs.3.rs-8903249/v1)
Supplement: Supplementary file 4 [file de9bf825f210e05c90c47b3f.xlsx]

## Sheet: Sheet1
Run Accession	Strain	PMID link (if applicable)	Notes and ISM sensivity
ERR1898728	BANANCL2	direct-to-pdf	Clone of BANAN/83/CRTRA/64, mildly resistant
ERR1898732	DJUMAK1	15710444	Classed resistant according to number of relapses after 1 mg/kg treatment in 6 mice (6/6 relapses)
ERR1898733	EATRO1157C2	15710444	Classed sensitive according to number of relapses after 1 mg/kg treatment in 6 mice (0/6 relapses)
ERR1898734	GUTR28X1	15710444	Classed sensitive according to number of relapses after 1 mg/kg treatment in 6 mice (0/6 relapses)
ERR1898735	GUTR37K1	15710444	Classed sensitive according to number of relapses after 1 mg/kg treatment in 6 mice (0/6 relapses)
ERR1898736	IL1180_ALL	9307025	Sensitive
ERR1898742	KONT1-129	Not available	Resistant
ERR1898743	KONT2-133	Not available	Resistant
ERR1898744	KONT2-155	Not available	Resistant
ERR1898750	MSOROM19K1	29032180	Resistant
ERR1898751	MSOROM7_ALL	29032180	Sensitive
ERR1898752	PAUWE73	10974163	Resistant
ERR1898755	SA267	1359750	Resistant
ERR1898756	SA268	1359750	Resistant
ERR1898763	TRT17C1	15710444	Classed intermediate resistance according to number of relapses after 1 mg/kg treatment in 5 mice (3/5 relapses)
ERR1898764	TRT21	15710444	Classed intermediate resistance according to number of relapses after 1 mg/kg treatment in 5 mice (2/5 relapses)
ERR1898765	TRT25K1	15710444	Classed resistant according to number of relapses after 1 mg/kg treatment in 6 mice (6/6 relapses)
ERR1898766	TRT37	15710444	Classed resistant according to number of relapses after 1 mg/kg treatment in 5 mice (4/5 relapses)
ERR1898770	TRT46	15710444	Classed intermediate resistance according to number of relapses after 1 mg/kg treatment in 5 mice (2/5 relapses)
ERR1898771	TRT54K1	15710444	Classed sensitive according to number of relapses after 1 mg/kg treatment in 6 mice (1/6 relapses)
ERR1898772	TRT573R	15710444	Classed resistant according to number of relapses after 1 mg/kg treatment in 6 mice (5/5 relapses)
